# Supplementary material for: Interplay between rhizospheric Pseudomonas chlororaphis strains lays the basis for beneficial bacterial consortia
Source: Front Plant Sci. 2022 Dec 15;13:1063182. doi: 10.3389/fpls.2022.1063182 (PMC9797978; doi:10.3389/fpls.2022.1063182)
Supplement: Supplementary file 6 [file Table_2.xlsx]

## Sheet: Hoja1
							Locus Tag/GeneID
Nº	Species	Strain	Origin	GeneBank sequence	NCBI RefSeq sequence	16S	rpoD	gyrB	recA
1	Pseudomonas aeruginosa (outgroup)	PAO1	Unknown	AE004091	NC_002516.2	PA0668.1/3240252	PA0576/882038	PA0004/879230	PA3617/880173
2	Pseudomonas sp.	R2-37-08W	Wheat rhizosphere	CP027728	NZ_CP027728.1	C4J93_RS00580	C4J93_RS24415	C4J93_RS00020	C4J93_RS06180
3	Pseudomonas sp.	R3-18-08	Wheat rhizosphere	CP027729	NZ_CP027729.1	C4J92_RS00575	C4J92_RS24170	C4J92_RS00020	C4J92_RS06075
4	Pseudomonas sp.	R1-43-08	Wheat rhizosphere	CP027734	NZ_CP027734.1	C4J87_RS00585	C4J87_RS23400	C4J87_RS00020	C4J87_RS05740
5	Pseudomonas sp.	R4-34-07	Wheat rhizosphere	CP027760	NZ_CP027760.1	C4J85_RS00580	C4J85_RS24750	C4J85_RS00020	C4J85_RS05810
6	Pseudomonas sp.	R4-39-08	Wheat rhizosphere	CP027733	NZ_CP027733.1	C4J88_RS00580	C4J88_RS24625	C4J88_RS00020	C4J88_RS05710
7	Pseudomonas sp.	R2-60-08W	Wheat rhizosphere	CP027731	NZ_CP027731.1	C4J90_RS00580	C4J90_RS24195	C4J90_RS00020	C4J90_RS05850
8	Pseudomonas sp.	R4-35-07	Wheat rhizosphere	CP027732	NZ_CP027732.1	C4J89_RS00575	C4J89_RS24190	C4J89_RS00020	C4J89_RS05925
9	Pseudomonas sp.	LBUM920	Spruce rhizosphere	CP027762	NZ_CP027762.1	C4J83_RS00595	C4J83_RS27565	C4J83_RS00020	C4J83_RS06190
10	Pseudomonas sp.	R5-89-07	Wheat rhizosphere	CP027727	NZ_CP027727.1	C4J94_RS00575	C4J94_RS24815	C4J94_RS00020	C4J94_RS06335
11	Pseudomonas sp.	R2-7-07	Wheat rhizosphere	CP027759	NZ_CP027759.1	C4J86_RS00585	C4J86_RS24095	C4J86_RS00020	C4J86_RS06370
12	Pseudomonas orientalis	8B	Wheat rhizosphere	CP027723	NZ_CP027723.1	C4J98_RS00585/61615367	C4J98_RS24305/61619977	C4J98_RS00020/61615258	C4J98_RS05825/61616395
13	Pseudomonas orientalis	R4-35-08	Wheat rhizosphere	CP027726	NZ_CP027726.1	C4J95_RS00580	C4J95_RS24625	C4J95_RS00020	C4J95_RS06030
14	Pseudomonas orientalis	L1-3-08	Wheat rhizosphere	CP027724	NZ_CP027724.1	C4J97_RS00585	C4J97_RS24610	C4J97_RS00020	C4J97_RS05890
15	Pseudomonas synxantha	7-79	Wheat rhizosphere	CP027755	NZ_CP027755.1	C4K02_RS00635	C4K02_RS26770	C4K02_RS00020	C4K02_RS06365
16	Pseudomonas synxantha	R2-4-08W	Strawberry rhizosphere	CP027757	NZ_CP027757.1	C4K00_RS00705	C4K00_RS25705	C4K00_RS00020	C4K00_RS06145
17	Pseudomonas synxantha	R2-54-08W	Wheat rhizosphere	CP027758	NZ_CP027758.1	C4J99_RS00575	C4J99_RS25925	C4J99_RS00020	C4J99_RS06130
18	Pseudomonas synxantha	R6-28-08	Wheat rhizosphere	CP027756	NZ_CP027756.1	C4K01_RS00570/61827991	C4K01_RS27535/61833276	C4K01_RS00020/61827882
19	Pseudomonas synxantha	30B	Wheat rhizosphere	CP027754	NZ_CP027754.1	C4K03_RS00635	C4K03_RS28825	C4K03_RS00020	C4K03_RS07010
20	Pseudomonas chlororaphis	B25	White and red clover rhizosphere	CP027753	NZ_CP027753.1	C4K04_RS00680	C4K04_RS29240	C4K04_RS00020	C4K04_RS06225
21	Pseudomonas chlororaphis	PA23	Soja root	CP008696	NZ_CP008696.1	EY04_RS00005	EY04_RS31595	EY04_RS28845	EY04_RS05535
22	Pseudomonas chlororaphis	PCL1606	Avocado rhizosphere	CP011110	NZ_CP011110.1	PCL1606_RS03320	PCL1606_RS03070	PCL1606_RS29605	PCL1606_RS23660
23	Pseudomonas chlororaphis	PCL1601	Avocado rhizosphere	GCA_001921865	GCF_001921865.1	HLB40_RS00595/61647817	HLB40_RS27615/61653221	HLB40_RS00020/61647702	HLB40_RS06120/61648922
24	Pseudomonas chlororaphis subsp. piscium	PCL1607	Avocado rhizosphere	CP027737	NZ_CP027737.1	C4K32_RS00595	C4K32_RS28180	C4K32_RS00020	C4K32_RS06585
25	Pseudomonas chlororaphis subsp. piscium	DTR133	Tomato rhizosphere	CP027735	NZ_CP027735.1	C4K34_RS00595	C4K34_RS28730	C4K34_RS00020	C4K34_RS06525
26	Pseudomonas chlororaphis subsp. piscium	ToZa7	Tomato rhizosphere	CP027739	NZ_CP027739.1	C4K30_RS00595	C4K30_RS28855	C4K30_RS00020	C4K30_RS06360
27	Pseudomonas chlororaphis subsp. piscium	ChPhzTR44	Tomato rhizosphere	CP027711	NZ_CP027711.1	C4K28_RS00595	C4K28_RS28295	C4K28_RS00020	C4K28_RS06345
28	Pseudomonas chlororaphis subsp. piscium	PCL1391	Tomato root	CP027736	NZ_CP027736.1	C4K33_RS00595	C4K33_RS27885	C4K33_RS00020	C4K33_RS06240
29	Pseudomonas chlororaphis subsp. aurantiaca	CW2	Radish rhizosphere	CP027743	NZ_CP027743.1	C4K20_RS00600	C4K20_RS28635	C4K20_RS00020	C4K20_RS06245
30	Pseudomonas chlororaphis subsp. aurantiaca	449	Maize rhizosphere	CP027741	NZ_CP027741.1	C4K22_RS00600	C4K22_RS28750	C4K22_RS00020	C4K22_RS06300
31	Pseudomonas chlororaphis subsp. aurantiaca	464	Beet rhizosphere	CP027742	NZ_CP027742.1	C4K21_RS00600	C4K21_RS28760	C4K21_RS00020	C4K21_RS06305
32	Pseudomonas chlororaphis subsp. aurantiaca	PCM2210	Beet rhizosphere	CP027717	NZ_CP027717.1	C4K16_RS00625	C4K16_RS28160	C4K16_RS00020	C4K16_RS06265
33	Pseudomonas chlororaphis subsp. aurantiaca	Q16	Alfalfa rhizosphere	CP027718	NZ_CP027718.1	C4K15_RS00600	C4K15_RS28310	C4K15_RS00020	C4K15_RS06235
34	Pseudomonas chlororaphis subsp. aurantiaca	M12	Maize rhizosphere	CP027715	NZ_CP027715.1	C4K24_RS00600	C4K24_RS27735	C4K24_RS00020	C4K24_RS06195
35	Pseudomonas chlororaphis subsp. aurantiaca	K27	White clover rhizosphere	CP027745	NZ_CP027745.1	C4K18_RS00665	C4K18_RS28640	C4K18_RS00020	C4K18_RS06500
36	Pseudomonas chlororaphis subsp. aurantiaca	M71	Tomato rhizosphere	CP027744	NZ_CP027744.1	C4K19_RS00650	C4K19_RS28125	C4K19_RS00020	C4K19_RS06630
37	Pseudomonas chlororaphis subsp. aureofaciens	P2	Potato rhizosphere	CP027719	NZ_CP027719.1	C4K14_RS00625	C4K14_RS30175	C4K14_RS00020	C4K14_RS06240
38	Pseudomonas chlororaphis subsp. aureofaciens	C50	Maize rhizosphere	CP027722	NZ_CP027722.1	C4K11_RS00625	C4K11_RS27740	C4K11_RS00020	C4K11_RS06210
39	Pseudomonas chlororaphis subsp. aureofaciens	ChPhzTR36	Tomato rhizosphere	CP027721	NZ_CP027721.1	C4K12_RS00625	C4K12_RS00625	C4K12_RS00020	C4K12_RS06440
40	Pseudomonas chlororaphis subsp. aureofaciens	66	Alfalfa rhizosphere	CP027747	NZ_CP027747.1	C4K10_RS00625	C4K10_RS28125	C4K10_RS00020	C4K10_RS06300
41	Pseudomonas chlororaphis subsp. aureofaciens	ChPhzTR38	Tomato rhizosphere	CP027752	NZ_CP027752.1	C4K05_RS00600	C4K05_RS28815	C4K05_RS00020	C4K05_RS06390
42	Pseudomonas chlororaphis subsp. aureofaciens	ChPhzTR39	Tomato rhizosphere	CP027749	NZ_CP027749.1	C4K08_RS00600	C4K08_RS29220	C4K08_RS00020	C4K08_RS06300
43	Pseudomonas chlororaphis subsp. aureofaciens	ChPhzTR18	Tomato rhizosphere	CP027751	NZ_CP027751.1	C4K06_RS00600	C4K06_RS28580	C4K06_RS00020	C4K06_RS06245
