# Supplementary material for: Interplay between rhizospheric Pseudomonas chlororaphis strains lays the basis for beneficial bacterial consortia
Source: Front Plant Sci. 2022 Dec 15;13:1063182. doi: 10.3389/fpls.2022.1063182 (PMC9797978; doi:10.3389/fpls.2022.1063182)
Supplement: Supplementary file 7 [file Table_3.xlsx]

## Sheet: pangenome
Index	Representative CDS name	Source(genome) of representative CDS	Occurrence	Occurrence(%)	COG Categoty:EggNog ID	KEGG ID	SEED	GO ID	Product	Function	Note
1	GCA_003851925.1_02811	Pseudomonas chlororaphis subsp. aureofaciens ChPhzTR39(GCA_003851925.1)	1	5.0					hypothetical protein
2	GCA_001921865.1_00763	MSCT_s PCL1601(GCA_001921865.1)	1	5.0					hypothetical protein
3	GCA_003851165.1_06015	Pseudomonas chlororaphis subsp. aurantiaca M12(GCA_003851165.1)	1	5.0					hypothetical protein
4	GCA_003850445.1_03347	Pseudomonas chlororaphis subsp. piscium PCL1391(GCA_003850445.1)	2	10.0					hypothetical protein
5	GCA_003850365.1_02463	Pseudomonas chlororaphis subsp. piscium ATCC 17809(GCA_003850365.1)	1	5.0					hypothetical protein
6	GCA_001921865.1_05772	MSCT_s PCL1601(GCA_001921865.1)	1	5.0					hypothetical protein
7	GCA_003851165.1_02299	Pseudomonas chlororaphis subsp. aurantiaca M12(GCA_003851165.1)	1	5.0					hypothetical protein
8	GCA_003851495.1_03285	Pseudomonas synxantha 2-79(GCA_003851495.1)	1	5.0					hypothetical protein
9	GCA_001921865.1_02411	MSCT_s PCL1601(GCA_001921865.1)	2	10.0					hypothetical protein
10	GCA_003850565.1_02656	CP027706_s CMR12a(GCA_003850565.1)	1	5.0					hypothetical protein
11	GCA_003850565.1_01517	CP027706_s CMR12a(GCA_003850565.1)	1	5.0					hypothetical protein
12	GCA_003850565.1_02345	CP027706_s CMR12a(GCA_003850565.1)	1	5.0					hypothetical protein
13	GCA_003851495.1_04261	Pseudomonas synxantha 2-79(GCA_003851495.1)	1	5.0					hypothetical protein
14	GCA_003850565.1_00311	CP027706_s CMR12a(GCA_003850565.1)	1	5.0					hypothetical protein
15	GCA_003850365.1_04220	Pseudomonas chlororaphis subsp. piscium ATCC 17809(GCA_003850365.1)	7	35.0					hypothetical protein
16	GCA_003850565.1_04588	CP027706_s CMR12a(GCA_003850565.1)	1	5.0					hypothetical protein
17	GCA_000963835.1_05271	CP010892_s PCL1606(GCA_000963835.1)	1	5.0					hypothetical protein
18	GCA_001921865.1_02571	MSCT_s PCL1601(GCA_001921865.1)	4	20.0					hypothetical protein
19	GCA_000264555.1_01943	Pseudomonas chlororaphis subsp. aureofaciens O6(GCA_000264555.1)	20	100.0					hypothetical protein
20	GCA_000963835.1_05546	CP010892_s PCL1606(GCA_000963835.1)	1	5.0					hypothetical protein
21	GCA_003851925.1_01720	Pseudomonas chlororaphis subsp. aureofaciens ChPhzTR39(GCA_003851925.1)	1	5.0					hypothetical protein
22	GCA_000698865.1_05762	Pseudomonas chlororaphis subsp. aureofaciens PA23(GCA_000698865.1)	1	5.0					hypothetical protein
23	GCA_000281915.1_03736	Pseudomonas chlororaphis subsp. chlororaphis 30-84(GCA_000281915.1)	1	5.0					hypothetical protein
24	GCA_003850365.1_01877	Pseudomonas chlororaphis subsp. piscium ATCC 17809(GCA_003850365.1)	4	20.0					hypothetical protein
25	GCA_003851405.1_03232	Pseudomonas chlororaphis subsp. aureofaciens 66(GCA_003851405.1)	2	10.0					hypothetical protein
26	GCA_003851925.1_02666	Pseudomonas chlororaphis subsp. aureofaciens ChPhzTR39(GCA_003851925.1)	1	5.0		K02014			hypothetical protein
27	GCA_003851785.1_03647	Pseudomonas chlororaphis subsp. aureofaciens Pb-St2(GCA_003851785.1)	1	5.0					hypothetical protein
28	GCA_003850445.1_04575	Pseudomonas chlororaphis subsp. piscium PCL1391(GCA_003850445.1)	3	15.0					hypothetical protein
29	GCA_003850445.1_02523	Pseudomonas chlororaphis subsp. piscium PCL1391(GCA_003850445.1)	2	10.0					hypothetical protein
30	GCA_003850565.1_00981	CP027706_s CMR12a(GCA_003850565.1)	1	5.0					hypothetical protein
31	GCA_000698865.1_01947	Pseudomonas chlororaphis subsp. aureofaciens PA23(GCA_000698865.1)	1	5.0					hypothetical protein
32	GCA_000963835.1_05511	CP010892_s PCL1606(GCA_000963835.1)	1	5.0					hypothetical protein
33	GCA_003850365.1_01146	Pseudomonas chlororaphis subsp. piscium ATCC 17809(GCA_003850365.1)	2	10.0					hypothetical protein
34	GCA_003850465.1_00879	Pseudomonas chlororaphis subsp. piscium PCL1607(GCA_003850465.1)	1	5.0					hypothetical protein
35	GCA_003851785.1_03538	Pseudomonas chlororaphis subsp. aureofaciens Pb-St2(GCA_003851785.1)	1	5.0					hypothetical protein
36	GCA_000698865.1_05984	Pseudomonas chlororaphis subsp. aureofaciens PA23(GCA_000698865.1)	3	15.0					hypothetical protein
37	GCA_003851925.1_03219	Pseudomonas chlororaphis subsp. aureofaciens ChPhzTR39(GCA_003851925.1)	1	5.0					hypothetical protein
38	GCA_000264555.1_00250	Pseudomonas chlororaphis subsp. aureofaciens O6(GCA_000264555.1)	19	95.0					hypothetical protein
39	GCA_003850565.1_01577	CP027706_s CMR12a(GCA_003850565.1)	1	5.0					hypothetical protein
40	GCA_003851835.1_04445	Pseudomonas chlororaphis subsp. aurantiaca DSM 19603(Type)(GCA_003851835.1)	1	5.0					hypothetical protein
41	GCA_003850365.1_01910	Pseudomonas chlororaphis subsp. piscium ATCC 17809(GCA_003850365.1)	2	10.0					hypothetical protein
42	GCA_003850365.1_00788	Pseudomonas chlororaphis subsp. piscium ATCC 17809(GCA_003850365.1)	1	5.0					hypothetical protein
43	GCA_000698865.1_03228	Pseudomonas chlororaphis subsp. aureofaciens PA23(GCA_000698865.1)	2	10.0					hypothetical protein
44	GCA_000264555.1_00588	Pseudomonas chlororaphis subsp. aureofaciens O6(GCA_000264555.1)	19	95.0					hypothetical protein
45	GCA_003850365.1_02353	Pseudomonas chlororaphis subsp. piscium ATCC 17809(GCA_003850365.1)	7	35.0					hypothetical protein
46	GCA_003850365.1_02623	Pseudomonas chlororaphis subsp. piscium ATCC 17809(GCA_003850365.1)	4	20.0					hypothetical protein
47	GCA_003851785.1_03928	Pseudomonas chlororaphis subsp. aureofaciens Pb-St2(GCA_003851785.1)	1	5.0					hypothetical protein
48	GCA_000264555.1_04417	Pseudomonas chlororaphis subsp. aureofaciens O6(GCA_000264555.1)	20	100.0		K01545			K+-transporting ATPase ATPase F chain
49	GCA_003850565.1_02818	CP027706_s CMR12a(GCA_003850565.1)	1	5.0					hypothetical protein
50	GCA_003850365.1_03946	Pseudomonas chlororaphis subsp. piscium ATCC 17809(GCA_003850365.1)	1	5.0					hypothetical protein
51	GCA_003851495.1_00574	Pseudomonas synxantha 2-79(GCA_003851495.1)	1	5.0					hypothetical protein
52	GCA_003851495.1_02113	Pseudomonas synxantha 2-79(GCA_003851495.1)	1	5.0					hypothetical protein
53	GCA_000963835.1_03723	CP010892_s PCL1606(GCA_000963835.1)	1	5.0					hypothetical protein
54	GCA_003850365.1_03292	Pseudomonas chlororaphis subsp. piscium ATCC 17809(GCA_003850365.1)	1	5.0					hypothetical protein
55	GCA_003850565.1_05049	CP027706_s CMR12a(GCA_003850565.1)	1	5.0					hypothetical protein
56	GCA_000264555.1_02993	Pseudomonas chlororaphis subsp. aureofaciens O6(GCA_000264555.1)	12	60.0					hypothetical protein
57	GCA_000281915.1_03120	Pseudomonas chlororaphis subsp. chlororaphis 30-84(GCA_000281915.1)	1	5.0					hypothetical protein
58	GCA_003851495.1_03008	Pseudomonas synxantha 2-79(GCA_003851495.1)	1	5.0					hypothetical protein
59	GCA_003851495.1_01209	Pseudomonas synxantha 2-79(GCA_003851495.1)	1	5.0					hypothetical protein
60	GCA_003851165.1_06019	Pseudomonas chlororaphis subsp. aurantiaca M12(GCA_003851165.1)	1	5.0					hypothetical protein
61	GCA_003850565.1_02166	CP027706_s CMR12a(GCA_003850565.1)	1	5.0					hypothetical protein
62	GCA_003851925.1_05111	Pseudomonas chlororaphis subsp. aureofaciens ChPhzTR39(GCA_003851925.1)	1	5.0	G:COG4993	K00117	Carbohydrates Central carbohydrate metabolism Entner-Doudoroff_Pathway Glucose dehydrogenase, PQQ-dependent (EC 1.1.5.2)		Quinoprotein glucose dehydrogenase (PQQ, quinone)		KEGG: pfl:PFL_4916 quinoprotein glucose dehydrogenase
63	GCA_000281915.1_03429	Pseudomonas chlororaphis subsp. chlororaphis 30-84(GCA_000281915.1)	1	5.0					hypothetical protein
64	GCA_000264555.1_04107	Pseudomonas chlororaphis subsp. aureofaciens O6(GCA_000264555.1)	12	60.0					hypothetical protein
65	GCA_001921865.1_00325	MSCT_s PCL1601(GCA_001921865.1)	1	5.0					hypothetical protein
66	GCA_000963835.1_03552	CP010892_s PCL1606(GCA_000963835.1)	1	5.0					hypothetical protein
67	GCA_000963835.1_00454	CP010892_s PCL1606(GCA_000963835.1)	1	5.0					hypothetical protein
68	GCA_003850445.1_04008	Pseudomonas chlororaphis subsp. piscium PCL1391(GCA_003850445.1)	4	20.0					hypothetical protein
69	GCA_003851785.1_02948	Pseudomonas chlororaphis subsp. aureofaciens Pb-St2(GCA_003851785.1)	1	5.0					hypothetical protein
70	GCA_000264555.1_03761	Pseudomonas chlororaphis subsp. aureofaciens O6(GCA_000264555.1)	16	80.0					hypothetical protein
71	GCA_000264555.1_02841	Pseudomonas chlororaphis subsp. aureofaciens O6(GCA_000264555.1)	10	50.0					hypothetical protein
72	GCA_001921865.1_01430	MSCT_s PCL1601(GCA_001921865.1)	1	5.0					hypothetical protein
73	GCA_003851205.1_02820	Pseudomonas chlororaphis subsp. aurantiaca 449(GCA_003851205.1)	2	10.0					hypothetical protein
74	GCA_003851495.1_00969	Pseudomonas synxantha 2-79(GCA_003851495.1)	1	5.0					hypothetical protein
75	GCA_003850465.1_00652	Pseudomonas chlororaphis subsp. piscium PCL1607(GCA_003850465.1)	2	10.0					hypothetical protein
76	GCA_000264555.1_02370	Pseudomonas chlororaphis subsp. aureofaciens O6(GCA_000264555.1)	5	25.0	K:COG1522				hypothetical protein
77	GCA_000281915.1_03771	Pseudomonas chlororaphis subsp. chlororaphis 30-84(GCA_000281915.1)	1	5.0					hypothetical protein
78	GCA_000963835.1_00028	CP010892_s PCL1606(GCA_000963835.1)	1	5.0					hypothetical protein
79	GCA_000963835.1_03427	CP010892_s PCL1606(GCA_000963835.1)	1	5.0					hypothetical protein
80	GCA_000264555.1_01103	Pseudomonas chlororaphis subsp. aureofaciens O6(GCA_000264555.1)	15	75.0					hypothetical protein
81	GCA_000281915.1_02992	Pseudomonas chlororaphis subsp. chlororaphis 30-84(GCA_000281915.1)	1	5.0					hypothetical protein
82	GCA_000264555.1_03869	Pseudomonas chlororaphis subsp. aureofaciens O6(GCA_000264555.1)	20	100.0					hypothetical protein
83	GCA_000264555.1_00689	Pseudomonas chlororaphis subsp. aureofaciens O6(GCA_000264555.1)	7	35.0					hypothetical protein
84	GCA_000264555.1_02113	Pseudomonas chlororaphis subsp. aureofaciens O6(GCA_000264555.1)	1	5.0					hypothetical protein
85	GCA_003851785.1_03618	Pseudomonas chlororaphis subsp. aureofaciens Pb-St2(GCA_003851785.1)	1	5.0					hypothetical protein
86	GCA_000264555.1_03650	Pseudomonas chlororaphis subsp. aureofaciens O6(GCA_000264555.1)	15	75.0					hypothetical protein
87	GCA_003850565.1_05484	CP027706_s CMR12a(GCA_003850565.1)	1	5.0					hypothetical protein
88	GCA_003851165.1_03352	Pseudomonas chlororaphis subsp. aurantiaca M12(GCA_003851165.1)	4	20.0					hypothetical protein
89	GCA_003850365.1_04585	Pseudomonas chlororaphis subsp. piscium ATCC 17809(GCA_003850365.1)	1	5.0					hypothetical protein
90	GCA_003851495.1_04240	Pseudomonas synxantha 2-79(GCA_003851495.1)	1	5.0					hypothetical protein
91	GCA_000264555.1_04690	Pseudomonas chlororaphis subsp. aureofaciens O6(GCA_000264555.1)	18	90.0					hypothetical protein
92	GCA_003850365.1_03668	Pseudomonas chlororaphis subsp. piscium ATCC 17809(GCA_003850365.1)	1	5.0					hypothetical protein
93	GCA_003850365.1_03305	Pseudomonas chlororaphis subsp. piscium ATCC 17809(GCA_003850365.1)	5	25.0					hypothetical protein
94	GCA_003851785.1_00853	Pseudomonas chlororaphis subsp. aureofaciens Pb-St2(GCA_003851785.1)	1	5.0					hypothetical protein
95	GCA_000264555.1_02530	Pseudomonas chlororaphis subsp. aureofaciens O6(GCA_000264555.1)	8	40.0					hypothetical protein
96	GCA_000281915.1_03110	Pseudomonas chlororaphis subsp. chlororaphis 30-84(GCA_000281915.1)	1	5.0					hypothetical protein
97	GCA_003851495.1_03716	Pseudomonas synxantha 2-79(GCA_003851495.1)	1	5.0					hypothetical protein
98	GCA_003851495.1_04301	Pseudomonas synxantha 2-79(GCA_003851495.1)	1	5.0					hypothetical protein
99	GCA_003851165.1_02952	Pseudomonas chlororaphis subsp. aurantiaca M12(GCA_003851165.1)	4	20.0					hypothetical protein
100	GCA_003850585.1_02577	Pseudomonas chlororaphis subsp. piscium ToZa7(GCA_003850585.1)	1	5.0					hypothetical protein
101	GCA_003850565.1_06142	CP027706_s CMR12a(GCA_003850565.1)	1	5.0					hypothetical protein
102	GCA_000264555.1_06031	Pseudomonas chlororaphis subsp. aureofaciens O6(GCA_000264555.1)	1	5.0					hypothetical protein
103	GCA_000281915.1_01350	Pseudomonas chlororaphis subsp. chlororaphis 30-84(GCA_000281915.1)	14	70.0					hypothetical protein
104	GCA_001921865.1_05951	MSCT_s PCL1601(GCA_001921865.1)	1	5.0					hypothetical protein
105	GCA_001921865.1_05712	MSCT_s PCL1601(GCA_001921865.1)	1	5.0					hypothetical protein
106	GCA_000698865.1_03451	Pseudomonas chlororaphis subsp. aureofaciens PA23(GCA_000698865.1)	1	5.0					hypothetical protein
107	GCA_003851785.1_02216	Pseudomonas chlororaphis subsp. aureofaciens Pb-St2(GCA_003851785.1)	1	5.0					hypothetical protein
108	GCA_000698865.1_05420	Pseudomonas chlororaphis subsp. aureofaciens PA23(GCA_000698865.1)	1	5.0					hypothetical protein
109	GCA_003850565.1_02474	CP027706_s CMR12a(GCA_003850565.1)	1	5.0					hypothetical protein
110	GCA_003851785.1_02484	Pseudomonas chlororaphis subsp. aureofaciens Pb-St2(GCA_003851785.1)	1	5.0					hypothetical protein
111	GCA_001921865.1_00211	MSCT_s PCL1601(GCA_001921865.1)	1	5.0					hypothetical protein
112	GCA_003850465.1_00872	Pseudomonas chlororaphis subsp. piscium PCL1607(GCA_003850465.1)	1	5.0					hypothetical protein
113	GCA_003850565.1_04805	CP027706_s CMR12a(GCA_003850565.1)	1	5.0					hypothetical protein
114	GCA_003851205.1_00190	Pseudomonas chlororaphis subsp. aurantiaca 449(GCA_003851205.1)	1	5.0					hypothetical protein
115	GCA_000264555.1_04546	Pseudomonas chlororaphis subsp. aureofaciens O6(GCA_000264555.1)	20	100.0					hypothetical protein
116	GCA_003851495.1_04477	Pseudomonas synxantha 2-79(GCA_003851495.1)	1	5.0					hypothetical protein
117	GCA_000264555.1_02230	Pseudomonas chlororaphis subsp. aureofaciens O6(GCA_000264555.1)	6	30.0					hypothetical protein
118	GCA_000281915.1_03510	Pseudomonas chlororaphis subsp. chlororaphis 30-84(GCA_000281915.1)	1	5.0					hypothetical protein
119	GCA_003851905.1_03523	Pseudomonas chlororaphis subsp. aureofaciens DSM 6698(Type)(GCA_003851905.1)	1	5.0					hypothetical protein
120	GCA_003850565.1_04870	CP027706_s CMR12a(GCA_003850565.1)	1	5.0					hypothetical protein
121	GCA_003851345.1_01363	Pseudomonas chlororaphis subsp. aurantiaca Q16(GCA_003851345.1)	2	10.0					hypothetical protein
122	GCA_003850365.1_03446	Pseudomonas chlororaphis subsp. piscium ATCC 17809(GCA_003850365.1)	1	5.0	E:COG1605	K04782	Amino Acids and Derivatives Aromatic amino acids and derivatives Chorismate:_Intermediate_for_synthesis_of_PAPA_antibiotics,_PABA,_anthranilate,_3-hydroxyanthranilate_and_more. Isochorismate pyruvate-lyase (EC 4.-.-.-)		Isochorismate lyase		KEGG: psos:POS17_0346 isochorismate pyruvate lyase
123	GCA_003851495.1_04749	Pseudomonas synxantha 2-79(GCA_003851495.1)	1	5.0					hypothetical protein
124	GCA_000698865.1_04057	Pseudomonas chlororaphis subsp. aureofaciens PA23(GCA_000698865.1)	3	15.0					hypothetical protein
125	GCA_003850445.1_03189	Pseudomonas chlororaphis subsp. piscium PCL1391(GCA_003850445.1)	3	15.0	G:ENOG410XP83	K11073			hypothetical protein
126	GCA_003850585.1_04728	Pseudomonas chlororaphis subsp. piscium ToZa7(GCA_003850585.1)	1	5.0					hypothetical protein
127	GCA_003851905.1_03685	Pseudomonas chlororaphis subsp. aureofaciens DSM 6698(Type)(GCA_003851905.1)	1	5.0					hypothetical protein
128	GCA_003851495.1_03891	Pseudomonas synxantha 2-79(GCA_003851495.1)	1	5.0					hypothetical protein
129	GCA_003851495.1_04278	Pseudomonas synxantha 2-79(GCA_003851495.1)	1	5.0					hypothetical protein
130	GCA_003851785.1_03002	Pseudomonas chlororaphis subsp. aureofaciens Pb-St2(GCA_003851785.1)	1	5.0	K:ENOG41127SZ				hypothetical protein
131	GCA_000264555.1_01692	Pseudomonas chlororaphis subsp. aureofaciens O6(GCA_000264555.1)	20	100.0					hypothetical protein
132	GCA_000698865.1_04228	Pseudomonas chlororaphis subsp. aureofaciens PA23(GCA_000698865.1)	1	5.0	H:COG0746	K03752	Cofactors, Vitamins, Prosthetic Groups, Pigments Folate and pterines Molybdenum_cofactor_biosynthesis Molybdopterin-guanine dinucleotide biosynthesis protein MobA	GO:0005737,GO:0003824,GO:0005525,GO:0046872,GO:0061603,GO:0006777	Molybdenum cofactor guanylyltransferase	Cytoplasm
133	GCA_001921865.1_02558	MSCT_s PCL1601(GCA_001921865.1)	1	5.0	K:COG1695				hypothetical protein
134	GCA_000281915.1_02671	Pseudomonas chlororaphis subsp. chlororaphis 30-84(GCA_000281915.1)	3	15.0					hypothetical protein
135	GCA_000264555.1_01383	Pseudomonas chlororaphis subsp. aureofaciens O6(GCA_000264555.1)	20	100.0					hypothetical protein
136	GCA_003850365.1_03676	Pseudomonas chlororaphis subsp. piscium ATCC 17809(GCA_003850365.1)	1	5.0					hypothetical protein
137	GCA_003851345.1_00228	Pseudomonas chlororaphis subsp. aurantiaca Q16(GCA_003851345.1)	1	5.0					hypothetical protein
138	GCA_003850565.1_05853	CP027706_s CMR12a(GCA_003850565.1)	1	5.0					hypothetical protein
139	GCA_003851405.1_02112	Pseudomonas chlororaphis subsp. aureofaciens 66(GCA_003851405.1)	1	5.0					hypothetical protein
140	GCA_000963835.1_02290	CP010892_s PCL1606(GCA_000963835.1)	1	5.0					hypothetical protein
141	GCA_003851495.1_04871	Pseudomonas synxantha 2-79(GCA_003851495.1)	1	5.0					hypothetical protein
142	GCA_003851835.1_03631	Pseudomonas chlororaphis subsp. aurantiaca DSM 19603(Type)(GCA_003851835.1)	2	10.0					hypothetical protein
143	GCA_000264555.1_04706	Pseudomonas chlororaphis subsp. aureofaciens O6(GCA_000264555.1)	18	90.0					hypothetical protein
144	GCA_003851205.1_01851	Pseudomonas chlororaphis subsp. aurantiaca 449(GCA_003851205.1)	1	5.0	S:ENOG410XWKD				hypothetical protein
145	GCA_003850565.1_02758	CP027706_s CMR12a(GCA_003850565.1)	1	5.0					hypothetical protein
146	GCA_000281915.1_04368	Pseudomonas chlororaphis subsp. chlororaphis 30-84(GCA_000281915.1)	11	55.0					hypothetical protein
147	GCA_000963835.1_01457	CP010892_s PCL1606(GCA_000963835.1)	1	5.0					hypothetical protein
148	GCA_003851925.1_05203	Pseudomonas chlororaphis subsp. aureofaciens ChPhzTR39(GCA_003851925.1)	1	5.0	FG:COG0537	K02503	Nucleosides and Nucleotides Pyrimidines pyrimidine_conversions Bis(5'-nucleosyl)-tetraphosphatase (asymmetrical) (EC 3.6.1.17)		hypothetical protein
149	GCA_003850565.1_00392	CP027706_s CMR12a(GCA_003850565.1)	1	5.0					hypothetical protein
150	GCA_003850565.1_03918	CP027706_s CMR12a(GCA_003850565.1)	2	10.0		K06135	Cofactors, Vitamins, Prosthetic Groups, Pigments Quinone cofactors Coenzyme_PQQ_synthesis Coenzyme PQQ synthesis protein A	GO:0003824,GO:0018189	Coenzyme PQQ synthesis protein	PQQ biosynthesis.	Required for coenzyme pyrroloquinoline quinone (PQQ) biosynthesis. PQQ is probably formed by cross-linking a specific glutamate to a specific tyrosine residue and excising these residues from the peptide
151	GCA_000281915.1_03639	Pseudomonas chlororaphis subsp. chlororaphis 30-84(GCA_000281915.1)	1	5.0					hypothetical protein
152	GCA_000698865.1_05437	Pseudomonas chlororaphis subsp. aureofaciens PA23(GCA_000698865.1)	1	5.0					hypothetical protein
153	GCA_003850565.1_05427	CP027706_s CMR12a(GCA_003850565.1)	1	5.0					hypothetical protein
154	GCA_000264555.1_02997	Pseudomonas chlororaphis subsp. aureofaciens O6(GCA_000264555.1)	19	95.0					hypothetical protein
155	GCA_003850585.1_00799	Pseudomonas chlororaphis subsp. piscium ToZa7(GCA_003850585.1)	3	15.0					hypothetical protein
156	GCA_003851265.1_03901	Pseudomonas chlororaphis subsp. aurantiaca M71(GCA_003851265.1)	1	5.0	S:ENOG410XNW1		Clustering-based subsystems Fatty acid metabolic cluster CBSS-246196.1.peg.364 3-oxoacyl-[acyl-carrier protein] reductase (EC 1.1.1.100)		hypothetical protein
157	GCA_003850565.1_03087	CP027706_s CMR12a(GCA_003850565.1)	1	5.0					hypothetical protein
158	GCA_000264555.1_02885	Pseudomonas chlororaphis subsp. aureofaciens O6(GCA_000264555.1)	19	95.0					hypothetical protein
159	GCA_003851785.1_02910	Pseudomonas chlororaphis subsp. aureofaciens Pb-St2(GCA_003851785.1)	1	5.0		K07100			hypothetical protein
160	GCA_003850365.1_02080	Pseudomonas chlororaphis subsp. piscium ATCC 17809(GCA_003850365.1)	4	20.0					hypothetical protein
161	GCA_003851165.1_02378	Pseudomonas chlororaphis subsp. aurantiaca M12(GCA_003851165.1)	1	5.0					hypothetical protein
162	GCA_003850565.1_04905	CP027706_s CMR12a(GCA_003850565.1)	1	5.0					hypothetical protein
163	GCA_003850365.1_03772	Pseudomonas chlororaphis subsp. piscium ATCC 17809(GCA_003850365.1)	1	5.0	L:COG2003	K03630	DNA Metabolism DNA repair DNA_repair,_bacterial DNA repair protein RadC		hypothetical protein
164	GCA_003850565.1_01595	CP027706_s CMR12a(GCA_003850565.1)	2	10.0					hypothetical protein
165	GCA_003850585.1_00794	Pseudomonas chlororaphis subsp. piscium ToZa7(GCA_003850585.1)	1	5.0					hypothetical protein
166	GCA_003850565.1_01487	CP027706_s CMR12a(GCA_003850565.1)	1	5.0					hypothetical protein
167	GCA_000281915.1_01245	Pseudomonas chlororaphis subsp. chlororaphis 30-84(GCA_000281915.1)	8	40.0					hypothetical protein
168	GCA_003850565.1_02056	CP027706_s CMR12a(GCA_003850565.1)	1	5.0					hypothetical protein
169	GCA_003850365.1_04974	Pseudomonas chlororaphis subsp. piscium ATCC 17809(GCA_003850365.1)	1	5.0					hypothetical protein
170	GCA_001921865.1_03605	MSCT_s PCL1601(GCA_001921865.1)	1	5.0					hypothetical protein
171	GCA_003851835.1_03849	Pseudomonas chlororaphis subsp. aurantiaca DSM 19603(Type)(GCA_003851835.1)	1	5.0	O:COG0625	K11209	Stress Response Oxidative stress Glutathione:_Non-redox_reactions Glutathione S-transferase (EC 2.5.1.18)		hypothetical protein		KEGG: panr:A7J50_2709 GSH-dependent disulfide-bond oxidoreductase
172	GCA_003850445.1_02601	Pseudomonas chlororaphis subsp. piscium PCL1391(GCA_003850445.1)	3	15.0					hypothetical protein
173	GCA_003850585.1_02587	Pseudomonas chlororaphis subsp. piscium ToZa7(GCA_003850585.1)	1	5.0					hypothetical protein
174	GCA_003851205.1_05829	Pseudomonas chlororaphis subsp. aurantiaca 449(GCA_003851205.1)	1	5.0					hypothetical protein
175	GCA_003851785.1_02065	Pseudomonas chlororaphis subsp. aureofaciens Pb-St2(GCA_003851785.1)	1	5.0					hypothetical protein
176	GCA_000281915.1_05949	Pseudomonas chlororaphis subsp. chlororaphis 30-84(GCA_000281915.1)	3	15.0					hypothetical protein
177	GCA_000264555.1_02782	Pseudomonas chlororaphis subsp. aureofaciens O6(GCA_000264555.1)	16	80.0					hypothetical protein
178	GCA_000264555.1_03241	Pseudomonas chlororaphis subsp. aureofaciens O6(GCA_000264555.1)	1	5.0					hypothetical protein
179	GCA_003851495.1_03162	Pseudomonas synxantha 2-79(GCA_003851495.1)	1	5.0					hypothetical protein
180	GCA_000264555.1_05020	Pseudomonas chlororaphis subsp. aureofaciens O6(GCA_000264555.1)	1	5.0					hypothetical protein
181	GCA_000281915.1_04535	Pseudomonas chlororaphis subsp. chlororaphis 30-84(GCA_000281915.1)	2	10.0					hypothetical protein
182	GCA_003851495.1_01195	Pseudomonas synxantha 2-79(GCA_003851495.1)	1	5.0					hypothetical protein
183	GCA_000963835.1_02937	CP010892_s PCL1606(GCA_000963835.1)	1	5.0					hypothetical protein
184	GCA_000264555.1_06165	Pseudomonas chlororaphis subsp. aureofaciens O6(GCA_000264555.1)	19	95.0					hypothetical protein
185	GCA_003851785.1_00245	Pseudomonas chlororaphis subsp. aureofaciens Pb-St2(GCA_003851785.1)	1	5.0					hypothetical protein
186	GCA_003851495.1_04507	Pseudomonas synxantha 2-79(GCA_003851495.1)	1	5.0					hypothetical protein
187	GCA_003850365.1_01223	Pseudomonas chlororaphis subsp. piscium ATCC 17809(GCA_003850365.1)	4	20.0	S:COG3179	K03791			hypothetical protein
188	GCA_000281915.1_05815	Pseudomonas chlororaphis subsp. chlororaphis 30-84(GCA_000281915.1)	6	30.0					hypothetical protein
189	GCA_003851495.1_01520	Pseudomonas synxantha 2-79(GCA_003851495.1)	1	5.0					hypothetical protein
190	GCA_003851785.1_02136	Pseudomonas chlororaphis subsp. aureofaciens Pb-St2(GCA_003851785.1)	1	5.0					hypothetical protein
191	GCA_000281915.1_04782	Pseudomonas chlororaphis subsp. chlororaphis 30-84(GCA_000281915.1)	9	45.0					hypothetical protein
192	GCA_003851205.1_01836	Pseudomonas chlororaphis subsp. aurantiaca 449(GCA_003851205.1)	1	5.0					hypothetical protein
193	GCA_000264555.1_02431	Pseudomonas chlororaphis subsp. aureofaciens O6(GCA_000264555.1)	1	5.0					hypothetical protein
194	GCA_000264555.1_02305	Pseudomonas chlororaphis subsp. aureofaciens O6(GCA_000264555.1)	7	35.0					hypothetical protein
195	GCA_003850365.1_01484	Pseudomonas chlororaphis subsp. piscium ATCC 17809(GCA_003850365.1)	1	5.0					hypothetical protein
196	GCA_003851495.1_04212	Pseudomonas synxantha 2-79(GCA_003851495.1)	1	5.0					hypothetical protein
197	GCA_003851835.1_03570	Pseudomonas chlororaphis subsp. aurantiaca DSM 19603(Type)(GCA_003851835.1)	1	5.0					hypothetical protein
198	GCA_001921865.1_05006	MSCT_s PCL1601(GCA_001921865.1)	1	5.0					hypothetical protein
199	GCA_003851925.1_03725	Pseudomonas chlororaphis subsp. aureofaciens ChPhzTR39(GCA_003851925.1)	1	5.0					hypothetical protein
200	GCA_000264555.1_02903	Pseudomonas chlororaphis subsp. aureofaciens O6(GCA_000264555.1)	9	45.0					hypothetical protein
201	GCA_003850565.1_05375	CP027706_s CMR12a(GCA_003850565.1)	1	5.0					hypothetical protein
202	GCA_003851905.1_03518	Pseudomonas chlororaphis subsp. aureofaciens DSM 6698(Type)(GCA_003851905.1)	1	5.0					hypothetical protein
203	GCA_000264555.1_04106	Pseudomonas chlororaphis subsp. aureofaciens O6(GCA_000264555.1)	4	20.0					hypothetical protein
204	GCA_000264555.1_05019	Pseudomonas chlororaphis subsp. aureofaciens O6(GCA_000264555.1)	1	5.0					hypothetical protein
205	GCA_003851265.1_04288	Pseudomonas chlororaphis subsp. aurantiaca M71(GCA_003851265.1)	1	5.0					hypothetical protein
206	GCA_003850565.1_02644	CP027706_s CMR12a(GCA_003850565.1)	1	5.0					hypothetical protein
207	GCA_000963835.1_02491	CP010892_s PCL1606(GCA_000963835.1)	2	10.0					hypothetical protein
208	GCA_003850365.1_02620	Pseudomonas chlororaphis subsp. piscium ATCC 17809(GCA_003850365.1)	1	5.0					hypothetical protein
209	GCA_000698865.1_01348	Pseudomonas chlororaphis subsp. aureofaciens PA23(GCA_000698865.1)	1	5.0					hypothetical protein
210	GCA_003851495.1_02051	Pseudomonas synxantha 2-79(GCA_003851495.1)	1	5.0					hypothetical protein
211	GCA_000281915.1_03108	Pseudomonas chlororaphis subsp. chlororaphis 30-84(GCA_000281915.1)	1	5.0					hypothetical protein
212	GCA_003851905.1_03525	Pseudomonas chlororaphis subsp. aureofaciens DSM 6698(Type)(GCA_003851905.1)	1	5.0					hypothetical protein
213	GCA_000264555.1_02702	Pseudomonas chlororaphis subsp. aureofaciens O6(GCA_000264555.1)	18	90.0					hypothetical protein
214	GCA_003851495.1_03140	Pseudomonas synxantha 2-79(GCA_003851495.1)	1	5.0					hypothetical protein
215	GCA_000264555.1_01687	Pseudomonas chlororaphis subsp. aureofaciens O6(GCA_000264555.1)	20	100.0					hypothetical protein
216	GCA_000281915.1_01648	Pseudomonas chlororaphis subsp. chlororaphis 30-84(GCA_000281915.1)	1	5.0					hypothetical protein
217	GCA_000281915.1_03144	Pseudomonas chlororaphis subsp. chlororaphis 30-84(GCA_000281915.1)	7	35.0					hypothetical protein
218	GCA_000264555.1_03900	Pseudomonas chlororaphis subsp. aureofaciens O6(GCA_000264555.1)	15	75.0					hypothetical protein
219	GCA_003851405.1_00230	Pseudomonas chlororaphis subsp. aureofaciens 66(GCA_003851405.1)	3	15.0					hypothetical protein
220	GCA_000264555.1_03560	Pseudomonas chlororaphis subsp. aureofaciens O6(GCA_000264555.1)	16	80.0					hypothetical protein
221	GCA_003850565.1_05671	CP027706_s CMR12a(GCA_003850565.1)	1	5.0	S:ENOG4111V75				hypothetical protein
222	GCA_003851495.1_02770	Pseudomonas synxantha 2-79(GCA_003851495.1)	1	5.0					hypothetical protein
223	GCA_000264555.1_02654	Pseudomonas chlororaphis subsp. aureofaciens O6(GCA_000264555.1)	6	30.0					hypothetical protein
224	GCA_003851265.1_03169	Pseudomonas chlororaphis subsp. aurantiaca M71(GCA_003851265.1)	1	5.0					hypothetical protein
225	GCA_000281915.1_03086	Pseudomonas chlororaphis subsp. chlororaphis 30-84(GCA_000281915.1)	1	5.0	C:COG1902		Fatty Acids, Lipids, and Isoprenoids Fatty acids Fatty_acid_degradation_regulons 2,4-dienoyl-CoA reductase [NADPH] (EC 1.3.1.34)		hypothetical protein
226	GCA_003851265.1_04014	Pseudomonas chlororaphis subsp. aurantiaca M71(GCA_003851265.1)	2	10.0					hypothetical protein
227	GCA_000264555.1_05958	Pseudomonas chlororaphis subsp. aureofaciens O6(GCA_000264555.1)	20	100.0					hypothetical protein
228	GCA_003851925.1_03285	Pseudomonas chlororaphis subsp. aureofaciens ChPhzTR39(GCA_003851925.1)	1	5.0					hypothetical protein
229	GCA_000698865.1_02346	Pseudomonas chlororaphis subsp. aureofaciens PA23(GCA_000698865.1)	3	15.0					hypothetical protein
230	GCA_000264555.1_06075	Pseudomonas chlororaphis subsp. aureofaciens O6(GCA_000264555.1)	6	30.0	L:COG3293				hypothetical protein
231	GCA_000264555.1_03710	Pseudomonas chlororaphis subsp. aureofaciens O6(GCA_000264555.1)	12	60.0					hypothetical protein
232	GCA_003851835.1_01796	Pseudomonas chlororaphis subsp. aurantiaca DSM 19603(Type)(GCA_003851835.1)	1	5.0					hypothetical protein
233	GCA_000264555.1_03208	Pseudomonas chlororaphis subsp. aureofaciens O6(GCA_000264555.1)	12	60.0					hypothetical protein
234	GCA_003850565.1_03049	CP027706_s CMR12a(GCA_003850565.1)	1	5.0					hypothetical protein
235	GCA_003851495.1_02630	Pseudomonas synxantha 2-79(GCA_003851495.1)	1	5.0					hypothetical protein
236	GCA_003850365.1_06315	Pseudomonas chlororaphis subsp. piscium ATCC 17809(GCA_003850365.1)	2	10.0					hypothetical protein
237	GCA_003851495.1_03662	Pseudomonas synxantha 2-79(GCA_003851495.1)	1	5.0	K:COG2944	K07726			hypothetical protein
238	GCA_003851495.1_04180	Pseudomonas synxantha 2-79(GCA_003851495.1)	1	5.0					hypothetical protein
239	GCA_003850365.1_03773	Pseudomonas chlororaphis subsp. piscium ATCC 17809(GCA_003850365.1)	1	5.0					hypothetical protein
240	GCA_003851905.1_03520	Pseudomonas chlororaphis subsp. aureofaciens DSM 6698(Type)(GCA_003851905.1)	1	5.0					hypothetical protein
241	GCA_003851345.1_02621	Pseudomonas chlororaphis subsp. aurantiaca Q16(GCA_003851345.1)	1	5.0					hypothetical protein
242	GCA_003851495.1_02938	Pseudomonas synxantha 2-79(GCA_003851495.1)	1	5.0					hypothetical protein
243	GCA_000264555.1_01795	Pseudomonas chlororaphis subsp. aureofaciens O6(GCA_000264555.1)	18	90.0					hypothetical protein
244	GCA_003850565.1_00769	CP027706_s CMR12a(GCA_003850565.1)	1	5.0					hypothetical protein
245	GCA_003850565.1_05847	CP027706_s CMR12a(GCA_003850565.1)	1	5.0					hypothetical protein
246	GCA_003851785.1_03853	Pseudomonas chlororaphis subsp. aureofaciens Pb-St2(GCA_003851785.1)	1	5.0	Q:COG3135	K05782			hypothetical protein
247	GCA_001921865.1_01524	MSCT_s PCL1601(GCA_001921865.1)	1	5.0					hypothetical protein
248	GCA_000264555.1_06006	Pseudomonas chlororaphis subsp. aureofaciens O6(GCA_000264555.1)	20	100.0					hypothetical protein
249	GCA_003850365.1_04025	Pseudomonas chlororaphis subsp. piscium ATCC 17809(GCA_003850365.1)	4	20.0					hypothetical protein
250	GCA_003850365.1_04920	Pseudomonas chlororaphis subsp. piscium ATCC 17809(GCA_003850365.1)	2	10.0					hypothetical protein
251	GCA_000963835.1_04878	CP010892_s PCL1606(GCA_000963835.1)	1	5.0					hypothetical protein
252	GCA_003850565.1_03235	CP027706_s CMR12a(GCA_003850565.1)	1	5.0					hypothetical protein
253	GCA_003851495.1_00194	Pseudomonas synxantha 2-79(GCA_003851495.1)	1	5.0					hypothetical protein
254	GCA_000264555.1_04942	Pseudomonas chlororaphis subsp. aureofaciens O6(GCA_000264555.1)	12	60.0	K:COG2771				hypothetical protein
255	GCA_003851495.1_02168	Pseudomonas synxantha 2-79(GCA_003851495.1)	1	5.0					hypothetical protein
256	GCA_003851495.1_02183	Pseudomonas synxantha 2-79(GCA_003851495.1)	1	5.0					hypothetical protein
257	GCA_003851495.1_02189	Pseudomonas synxantha 2-79(GCA_003851495.1)	1	5.0					hypothetical protein
258	GCA_003851905.1_03524	Pseudomonas chlororaphis subsp. aureofaciens DSM 6698(Type)(GCA_003851905.1)	1	5.0					hypothetical protein
259	GCA_000698865.1_05514	Pseudomonas chlororaphis subsp. aureofaciens PA23(GCA_000698865.1)	1	5.0					hypothetical protein
260	GCA_003850565.1_01422	CP027706_s CMR12a(GCA_003850565.1)	1	5.0					hypothetical protein
261	GCA_000698865.1_01492	Pseudomonas chlororaphis subsp. aureofaciens PA23(GCA_000698865.1)	4	20.0					hypothetical protein
262	GCA_003850565.1_03085	CP027706_s CMR12a(GCA_003850565.1)	1	5.0					hypothetical protein
263	GCA_000698865.1_02010	Pseudomonas chlororaphis subsp. aureofaciens PA23(GCA_000698865.1)	2	10.0					hypothetical protein
264	GCA_003850565.1_01984	CP027706_s CMR12a(GCA_003850565.1)	1	5.0					hypothetical protein
265	GCA_003850445.1_05009	Pseudomonas chlororaphis subsp. piscium PCL1391(GCA_003850445.1)	3	15.0					hypothetical protein
266	GCA_000698865.1_06323	Pseudomonas chlororaphis subsp. aureofaciens PA23(GCA_000698865.1)	4	20.0					hypothetical protein
267	GCA_003851165.1_04765	Pseudomonas chlororaphis subsp. aurantiaca M12(GCA_003851165.1)	3	15.0					hypothetical protein
268	GCA_001921865.1_05537	MSCT_s PCL1601(GCA_001921865.1)	1	5.0					hypothetical protein
269	GCA_000963835.1_02252	CP010892_s PCL1606(GCA_000963835.1)	6	30.0					hypothetical protein
270	GCA_001921865.1_02313	MSCT_s PCL1601(GCA_001921865.1)	1	5.0	L:COG0582				hypothetical protein
271	GCA_003850365.1_03319	Pseudomonas chlororaphis subsp. piscium ATCC 17809(GCA_003850365.1)	1	5.0					hypothetical protein
272	GCA_003850565.1_04387	CP027706_s CMR12a(GCA_003850565.1)	1	5.0					hypothetical protein
273	GCA_003850565.1_05278	CP027706_s CMR12a(GCA_003850565.1)	2	10.0					hypothetical protein
274	GCA_003851905.1_03601	Pseudomonas chlororaphis subsp. aureofaciens DSM 6698(Type)(GCA_003851905.1)	1	5.0					hypothetical protein
275	GCA_000281915.1_03292	Pseudomonas chlororaphis subsp. chlororaphis 30-84(GCA_000281915.1)	1	5.0	G:ENOG410XP83	K11073			putrescine transport system substrate-binding protein
276	GCA_000264555.1_01957	Pseudomonas chlororaphis subsp. aureofaciens O6(GCA_000264555.1)	20	100.0					hypothetical protein
277	GCA_003851925.1_00806	Pseudomonas chlororaphis subsp. aureofaciens ChPhzTR39(GCA_003851925.1)	1	5.0					hypothetical protein
278	GCA_003850365.1_03755	Pseudomonas chlororaphis subsp. piscium ATCC 17809(GCA_003850365.1)	1	5.0	S:ENOG410Y2TM				hypothetical protein
279	GCA_003851205.1_04080	Pseudomonas chlororaphis subsp. aurantiaca 449(GCA_003851205.1)	3	15.0	E:COG0410	K01996	Membrane Transport ABC transporters ABC_transporter_branched-chain_amino_acid_(TC_3.A.1.4.1) Branched-chain amino acid transport ATP-binding protein LivF (TC 3.A.1.4.1)		hypothetical protein
280	GCA_003851495.1_03764	Pseudomonas synxantha 2-79(GCA_003851495.1)	1	5.0					hypothetical protein
281	GCA_003851905.1_03473	Pseudomonas chlororaphis subsp. aureofaciens DSM 6698(Type)(GCA_003851905.1)	1	5.0	S:ENOG410XYK4				hypothetical protein
282	GCA_003851165.1_03548	Pseudomonas chlororaphis subsp. aurantiaca M12(GCA_003851165.1)	3	15.0					hypothetical protein
283	GCA_003850445.1_04707	Pseudomonas chlororaphis subsp. piscium PCL1391(GCA_003850445.1)	3	15.0					hypothetical protein
284	GCA_003851495.1_04932	Pseudomonas synxantha 2-79(GCA_003851495.1)	1	5.0					hypothetical protein
285	GCA_003851785.1_02483	Pseudomonas chlororaphis subsp. aureofaciens Pb-St2(GCA_003851785.1)	1	5.0					hypothetical protein
286	GCA_003850445.1_03393	Pseudomonas chlororaphis subsp. piscium PCL1391(GCA_003850445.1)	3	15.0	I:COG1024	K01692	Carbohydrates Fermentation Butanol_Biosynthesis Enoyl-CoA hydratase (EC 4.2.1.17)		Enoyl-CoA hydratase		KEGG: msa:Mycsm_05147 enoyl-CoA hydratase
287	GCA_000698865.1_03033	Pseudomonas chlororaphis subsp. aureofaciens PA23(GCA_000698865.1)	1	5.0					hypothetical protein
288	GCA_000963835.1_02012	CP010892_s PCL1606(GCA_000963835.1)	1	5.0					hypothetical protein
289	GCA_003851785.1_00064	Pseudomonas chlororaphis subsp. aureofaciens Pb-St2(GCA_003851785.1)	1	5.0					hypothetical protein
290	GCA_000264555.1_03372	Pseudomonas chlororaphis subsp. aureofaciens O6(GCA_000264555.1)	18	90.0					hypothetical protein
291	GCA_001921865.1_02277	MSCT_s PCL1601(GCA_001921865.1)	1	5.0					hypothetical protein
292	GCA_000698865.1_05439	Pseudomonas chlororaphis subsp. aureofaciens PA23(GCA_000698865.1)	1	5.0					hypothetical protein
293	GCA_000698865.1_04138	Pseudomonas chlororaphis subsp. aureofaciens PA23(GCA_000698865.1)	5	25.0					hypothetical protein
294	GCA_000264555.1_02168	Pseudomonas chlororaphis subsp. aureofaciens O6(GCA_000264555.1)	1	5.0	S:COG4723		Phages, Prophages, Transposable elements, Plasmids Phages, Prophages Phage_tail_proteins_2 Phage tail assembly protein I		hypothetical protein
295	GCA_000264555.1_04905	Pseudomonas chlororaphis subsp. aureofaciens O6(GCA_000264555.1)	10	50.0					hypothetical protein
296	GCA_003851835.1_03540	Pseudomonas chlororaphis subsp. aurantiaca DSM 19603(Type)(GCA_003851835.1)	1	5.0	S:ENOG410Z8T1				hypothetical protein
297	GCA_000264555.1_04464	Pseudomonas chlororaphis subsp. aureofaciens O6(GCA_000264555.1)	20	100.0	S:ENOG410XV0K				hypothetical protein
298	GCA_003850365.1_04515	Pseudomonas chlororaphis subsp. piscium ATCC 17809(GCA_003850365.1)	1	5.0					hypothetical protein
299	GCA_001921865.1_05536	MSCT_s PCL1601(GCA_001921865.1)	2	10.0	J:COG0257	K02919	Protein Metabolism Protein biosynthesis Ribosome_LSU_bacterial LSU ribosomal protein L36p	GO:0005840,GO:0003735,GO:0006412	50S ribosomal protein L36	Ribonucleoprotein
300	GCA_000963835.1_00747	CP010892_s PCL1606(GCA_000963835.1)	1	5.0					hypothetical protein
301	GCA_000264555.1_06127	Pseudomonas chlororaphis subsp. aureofaciens O6(GCA_000264555.1)	20	100.0	J:COG0267	K02913	Protein Metabolism Protein biosynthesis Ribosome_LSU_bacterial LSU ribosomal protein L33p	GO:0005840,GO:0003735,GO:0006412	50S ribosomal protein L33 3	Ribonucleoprotein
302	GCA_003850445.1_03694	Pseudomonas chlororaphis subsp. piscium PCL1391(GCA_003850445.1)	1	5.0	S:ENOG410ZU0E				hypothetical protein
303	GCA_000281915.1_03519	Pseudomonas chlororaphis subsp. chlororaphis 30-84(GCA_000281915.1)	1	5.0	S:ENOG410XNPZ	K04091			Alkanesulfonate monooxygenase		KEGG: ret:RHE_PB00119 alkanesulfonate monooxygenase
304	GCA_000281915.1_02224	Pseudomonas chlororaphis subsp. chlororaphis 30-84(GCA_000281915.1)	1	5.0					hypothetical protein
305	GCA_000264555.1_03937	Pseudomonas chlororaphis subsp. aureofaciens O6(GCA_000264555.1)	17	85.0					hypothetical protein
306	GCA_000264555.1_03938	Pseudomonas chlororaphis subsp. aureofaciens O6(GCA_000264555.1)	17	85.0	S:ENOG410Y51T		Virulence, Disease and Defense null Bacterial_cyanide_production_and_tolerance_mechanisms Cyanide insensitive terminal oxidase, putative subunit III		hypothetical protein
307	GCA_000264555.1_00791	Pseudomonas chlororaphis subsp. aureofaciens O6(GCA_000264555.1)	20	100.0					hypothetical protein
308	GCA_003850565.1_04898	CP027706_s CMR12a(GCA_003850565.1)	1	5.0	C:COG0426	K12264	Stress Response Oxidative stress Rubrerythrin Rubredoxin	GO:0005737,GO:0009055,GO:0005506,GO:0043448,GO:0055114	Rubredoxin-1	Cytoplasm
309	GCA_003851835.1_03452	Pseudomonas chlororaphis subsp. aurantiaca DSM 19603(Type)(GCA_003851835.1)	2	10.0	S:ENOG4111V1M				hypothetical protein
310	GCA_000264555.1_05692	Pseudomonas chlororaphis subsp. aureofaciens O6(GCA_000264555.1)	20	100.0	S:COG0401			GO:0016021,GO:0005886	UPF0057 membrane protein PA0567	Cell membrane
311	GCA_000264555.1_02749	Pseudomonas chlororaphis subsp. aureofaciens O6(GCA_000264555.1)	18	90.0	S:ENOG410ZBE3				hypothetical protein
312	GCA_000264555.1_02164	Pseudomonas chlororaphis subsp. aureofaciens O6(GCA_000264555.1)	1	5.0					hypothetical protein
313	GCA_000963835.1_03179	CP010892_s PCL1606(GCA_000963835.1)	3	15.0					hypothetical protein
314	GCA_000698865.1_04099	Pseudomonas chlororaphis subsp. aureofaciens PA23(GCA_000698865.1)	2	10.0					hypothetical protein
315	GCA_000963835.1_03027	CP010892_s PCL1606(GCA_000963835.1)	1	5.0					hypothetical protein
316	GCA_000963835.1_03493	CP010892_s PCL1606(GCA_000963835.1)	1	5.0	FJ:COG4445	K06169	RNA Metabolism RNA processing and modification tRNA_modification_Bacteria tRNA-(ms[2]io[6]A)-hydroxylase (EC 1.-.-.-)		tRNA-(ms[2]io[6]A)-hydroxylase		KEGG: pre:PCA10_36930 tRNA-(ms(2)io(6)A)-hydroxylase
317	GCA_003850365.1_03751	Pseudomonas chlororaphis subsp. piscium ATCC 17809(GCA_003850365.1)	1	5.0	S:ENOG410Y51T		Virulence, Disease and Defense null Bacterial_cyanide_production_and_tolerance_mechanisms Cyanide insensitive terminal oxidase, putative subunit III		hypothetical protein
318	GCA_003850365.1_01992	Pseudomonas chlororaphis subsp. piscium ATCC 17809(GCA_003850365.1)	4	20.0					hypothetical protein
319	GCA_003850565.1_05387	CP027706_s CMR12a(GCA_003850565.1)	1	5.0					hypothetical protein
320	GCA_000963835.1_05263	CP010892_s PCL1606(GCA_000963835.1)	1	5.0					hypothetical protein
321	GCA_000264555.1_00097	Pseudomonas chlororaphis subsp. aureofaciens O6(GCA_000264555.1)	20	100.0	S:ENOG410XUDB			GO:0016021,GO:0005886	UPF0391 membrane protein Pfl01_0044	Cell membrane
322	GCA_003850565.1_03102	CP027706_s CMR12a(GCA_003850565.1)	1	5.0					hypothetical protein
323	GCA_003851925.1_01453	Pseudomonas chlororaphis subsp. aureofaciens ChPhzTR39(GCA_003851925.1)	1	5.0					hypothetical protein
324	GCA_003850365.1_04856	Pseudomonas chlororaphis subsp. piscium ATCC 17809(GCA_003850365.1)	3	15.0					hypothetical protein
325	GCA_003850585.1_03480	Pseudomonas chlororaphis subsp. piscium ToZa7(GCA_003850585.1)	1	5.0					hypothetical protein
326	GCA_003851495.1_03272	Pseudomonas synxantha 2-79(GCA_003851495.1)	1	5.0					hypothetical protein
327	GCA_003851345.1_00980	Pseudomonas chlororaphis subsp. aurantiaca Q16(GCA_003851345.1)	1	5.0					hypothetical protein
328	GCA_003850565.1_02994	CP027706_s CMR12a(GCA_003850565.1)	1	5.0					hypothetical protein
329	GCA_003850565.1_05016	CP027706_s CMR12a(GCA_003850565.1)	1	5.0	S:ENOG410YMTS				hypothetical protein
330	GCA_003851495.1_01126	Pseudomonas synxantha 2-79(GCA_003851495.1)	1	5.0					hypothetical protein
331	GCA_003850445.1_03348	Pseudomonas chlororaphis subsp. piscium PCL1391(GCA_003850445.1)	2	10.0					hypothetical protein
332	GCA_003850465.1_03414	Pseudomonas chlororaphis subsp. piscium PCL1607(GCA_003850465.1)	1	5.0					hypothetical protein
333	GCA_003850365.1_03648	Pseudomonas chlororaphis subsp. piscium ATCC 17809(GCA_003850365.1)	1	5.0					hypothetical protein
334	GCA_003851495.1_05017	Pseudomonas synxantha 2-79(GCA_003851495.1)	1	5.0					hypothetical protein
335	GCA_003851495.1_03229	Pseudomonas synxantha 2-79(GCA_003851495.1)	1	5.0	C:COG1773	K05297	Stress Response Oxidative stress Rubrerythrin Rubredoxin	GO:0005737,GO:0005506,GO:0043448,GO:0055114	Rubredoxin--NAD(+) reductase	Cytoplasm
336	GCA_000264555.1_06179	Pseudomonas chlororaphis subsp. aureofaciens O6(GCA_000264555.1)	20	100.0	C:COG1251	K05297	Stress Response Oxidative stress Rubrerythrin Rubredoxin	GO:0005737,GO:0009055,GO:0005506,GO:0043448,GO:0055114	Rubredoxin--NAD(+) reductase	Cytoplasm
337	GCA_003850445.1_02354	Pseudomonas chlororaphis subsp. piscium PCL1391(GCA_003850445.1)	5	25.0					hypothetical protein
338	GCA_003851495.1_04606	Pseudomonas synxantha 2-79(GCA_003851495.1)	1	5.0					hypothetical protein
339	GCA_000264555.1_05476	Pseudomonas chlororaphis subsp. aureofaciens O6(GCA_000264555.1)	20	100.0	S:COG3036	K09890			alternative ribosome-rescue factor
340	GCA_003851925.1_04045	Pseudomonas chlororaphis subsp. aureofaciens ChPhzTR39(GCA_003851925.1)	1	5.0	L:COG0708	K01142	DNA Metabolism DNA repair DNA_repair,_bacterial Exodeoxyribonuclease III (EC 3.1.11.2)	GO:0005829,GO:0003677,GO:0003906,GO:0008311,GO:0008853,GO:0004527,GO:0046872,GO:0006284,GO:0006974,GO:0090305	Exodeoxyribonuclease III	DNA damage
341	GCA_003851835.1_03448	Pseudomonas chlororaphis subsp. aurantiaca DSM 19603(Type)(GCA_003851835.1)	2	10.0					hypothetical protein
342	GCA_000698865.1_03436	Pseudomonas chlororaphis subsp. aureofaciens PA23(GCA_000698865.1)	2	10.0					hypothetical protein
343	GCA_000698865.1_01319	Pseudomonas chlororaphis subsp. aureofaciens PA23(GCA_000698865.1)	2	10.0					hypothetical protein
344	GCA_000281915.1_03756	Pseudomonas chlororaphis subsp. chlororaphis 30-84(GCA_000281915.1)	1	5.0					hypothetical protein
345	GCA_003850445.1_06066	Pseudomonas chlororaphis subsp. piscium PCL1391(GCA_003850445.1)	1	5.0					hypothetical protein
346	GCA_000264555.1_03902	Pseudomonas chlororaphis subsp. aureofaciens O6(GCA_000264555.1)	8	40.0					hypothetical protein
347	GCA_000264555.1_04419	Pseudomonas chlororaphis subsp. aureofaciens O6(GCA_000264555.1)	20	100.0					hypothetical protein
348	GCA_003851495.1_02913	Pseudomonas synxantha 2-79(GCA_003851495.1)	1	5.0					hypothetical protein
349	GCA_000264555.1_03627	Pseudomonas chlororaphis subsp. aureofaciens O6(GCA_000264555.1)	12	60.0	S:ENOG410XUY1	K21636	Amino Acids and Derivatives Lysine, threonine, methionine, and cysteine Methionine_Degradation Adenosylhomocysteinase (EC 3.3.1.1)		Ribonucleoside-triphosphate reductase (formate)		KEGG: dma:DMR_44320 ribonucleoside-triphosphate reductase (formate)
350	GCA_003850565.1_02195	CP027706_s CMR12a(GCA_003850565.1)	1	5.0					hypothetical protein
351	GCA_000264555.1_00687	Pseudomonas chlororaphis subsp. aureofaciens O6(GCA_000264555.1)	16	80.0					hypothetical protein
352	GCA_003850365.1_05172	Pseudomonas chlororaphis subsp. piscium ATCC 17809(GCA_003850365.1)	8	40.0					hypothetical protein
353	GCA_000264555.1_04082	Pseudomonas chlororaphis subsp. aureofaciens O6(GCA_000264555.1)	16	80.0					hypothetical protein
354	GCA_003851205.1_04053	Pseudomonas chlororaphis subsp. aurantiaca 449(GCA_003851205.1)	4	20.0					hypothetical protein
355	GCA_003851265.1_02151	Pseudomonas chlororaphis subsp. aurantiaca M71(GCA_003851265.1)	1	5.0					hypothetical protein
356	GCA_000264555.1_02130	Pseudomonas chlororaphis subsp. aureofaciens O6(GCA_000264555.1)	1	5.0					hypothetical protein
357	GCA_003850365.1_05321	Pseudomonas chlororaphis subsp. piscium ATCC 17809(GCA_003850365.1)	1	5.0	L:COG0582				hypothetical protein
358	GCA_003851265.1_00346	Pseudomonas chlororaphis subsp. aurantiaca M71(GCA_003851265.1)	1	5.0					hypothetical protein
359	GCA_000264555.1_03214	Pseudomonas chlororaphis subsp. aureofaciens O6(GCA_000264555.1)	12	60.0					hypothetical protein
360	GCA_003850565.1_04869	CP027706_s CMR12a(GCA_003850565.1)	1	5.0					hypothetical protein
361	GCA_003851495.1_03837	Pseudomonas synxantha 2-79(GCA_003851495.1)	1	5.0					hypothetical protein
362	GCA_000963835.1_02621	CP010892_s PCL1606(GCA_000963835.1)	1	5.0					hypothetical protein
363	GCA_000264555.1_02290	Pseudomonas chlororaphis subsp. aureofaciens O6(GCA_000264555.1)	1	5.0					hypothetical protein
364	GCA_003850365.1_02642	Pseudomonas chlororaphis subsp. piscium ATCC 17809(GCA_003850365.1)	1	5.0					hypothetical protein
365	GCA_000264555.1_03026	Pseudomonas chlororaphis subsp. aureofaciens O6(GCA_000264555.1)	20	100.0					hypothetical protein
366	GCA_000264555.1_03155	Pseudomonas chlororaphis subsp. aureofaciens O6(GCA_000264555.1)	6	30.0		K03526			(E)-4-hydroxy-3-methylbut-2-enyl-diphosphate synthase (ferredoxin)		KEGG: pch:EY04_14490 (E)-4-hydroxy-3-methylbut-2-enyl-diphosphate synthase
367	GCA_000264555.1_03203	Pseudomonas chlororaphis subsp. aureofaciens O6(GCA_000264555.1)	15	75.0					hypothetical protein
368	GCA_003851405.1_01873	Pseudomonas chlororaphis subsp. aureofaciens 66(GCA_003851405.1)	1	5.0					hypothetical protein
369	GCA_000264555.1_05408	Pseudomonas chlororaphis subsp. aureofaciens O6(GCA_000264555.1)	20	100.0	S:ENOG410Y51T		Virulence, Disease and Defense null Bacterial_cyanide_production_and_tolerance_mechanisms Cyanide insensitive terminal oxidase, putative subunit III		hypothetical protein
370	GCA_003850565.1_04917	CP027706_s CMR12a(GCA_003850565.1)	1	5.0					hypothetical protein
371	GCA_003851265.1_00900	Pseudomonas chlororaphis subsp. aurantiaca M71(GCA_003851265.1)	1	5.0					hypothetical protein
372	GCA_003851495.1_00276	Pseudomonas synxantha 2-79(GCA_003851495.1)	1	5.0					hypothetical protein
373	GCA_000281915.1_04156	Pseudomonas chlororaphis subsp. chlororaphis 30-84(GCA_000281915.1)	3	15.0	T:COG1551	K03563	Stress Response null Carbon_Starvation Carbon storage regulator		carbon storage regulator
374	GCA_003851495.1_05410	Pseudomonas synxantha 2-79(GCA_003851495.1)	1	5.0	P:COG3004	K03313	Membrane Transport Uni- Sym- and Antiporters Na(+)_H(+)_antiporter Na+/H+ antiporter NhaA type	GO:0016021,GO:0005886,GO:0015297,GO:0015081,GO:0006885	Na(+)/H(+) antiporter NhaA	Antiport
375	GCA_003850365.1_02609	Pseudomonas chlororaphis subsp. piscium ATCC 17809(GCA_003850365.1)	1	5.0					hypothetical protein
376	GCA_003851495.1_00154	Pseudomonas synxantha 2-79(GCA_003851495.1)	1	5.0					hypothetical protein
377	GCA_003851265.1_01449	Pseudomonas chlororaphis subsp. aurantiaca M71(GCA_003851265.1)	2	10.0					hypothetical protein
378	GCA_003851165.1_01883	Pseudomonas chlororaphis subsp. aurantiaca M12(GCA_003851165.1)	1	5.0					hypothetical protein
379	GCA_003851495.1_00762	Pseudomonas synxantha 2-79(GCA_003851495.1)	1	5.0					hypothetical protein
380	GCA_003851925.1_00156	Pseudomonas chlororaphis subsp. aureofaciens ChPhzTR39(GCA_003851925.1)	1	5.0					hypothetical protein
381	GCA_003850565.1_01212	CP027706_s CMR12a(GCA_003850565.1)	1	5.0					hypothetical protein
382	GCA_003850365.1_02306	Pseudomonas chlororaphis subsp. piscium ATCC 17809(GCA_003850365.1)	1	5.0					hypothetical protein
383	GCA_000264555.1_02341	Pseudomonas chlororaphis subsp. aureofaciens O6(GCA_000264555.1)	19	95.0		K21904	Stress Response Oxidative stress Oxidative_stress Metallothionein		hypothetical protein
384	GCA_003850565.1_03328	CP027706_s CMR12a(GCA_003850565.1)	1	5.0					hypothetical protein
385	GCA_003851835.1_03628	Pseudomonas chlororaphis subsp. aurantiaca DSM 19603(Type)(GCA_003851835.1)	1	5.0					hypothetical protein
386	GCA_003851265.1_02076	Pseudomonas chlororaphis subsp. aurantiaca M71(GCA_003851265.1)	1	5.0	L:COG2801	K07497			hypothetical protein
387	GCA_000264555.1_03554	Pseudomonas chlororaphis subsp. aureofaciens O6(GCA_000264555.1)	17	85.0					hypothetical protein
388	GCA_000264555.1_03534	Pseudomonas chlororaphis subsp. aureofaciens O6(GCA_000264555.1)	20	100.0					hypothetical protein
389	GCA_000264555.1_01766	Pseudomonas chlororaphis subsp. aureofaciens O6(GCA_000264555.1)	20	100.0	U:COG3114	K02196	Respiration null Biogenesis_of_c-type_cytochromes Cytochrome c-type biogenesis protein CcmD, interacts with CcmCE	GO:0016021,GO:0005886,GO:0017004,GO:0015886	Heme exporter protein D	Cell inner membrane
390	GCA_003850565.1_06098	CP027706_s CMR12a(GCA_003850565.1)	1	5.0					hypothetical protein
391	GCA_003851205.1_01827	Pseudomonas chlororaphis subsp. aurantiaca 449(GCA_003851205.1)	1	5.0					hypothetical protein
392	GCA_000963835.1_00885	CP010892_s PCL1606(GCA_000963835.1)	1	5.0					hypothetical protein
393	GCA_003851925.1_05641	Pseudomonas chlororaphis subsp. aureofaciens ChPhzTR39(GCA_003851925.1)	1	5.0	S:COG5642				hypothetical protein
394	GCA_000264555.1_02034	Pseudomonas chlororaphis subsp. aureofaciens O6(GCA_000264555.1)	20	100.0	C:ENOG410XUKB	K00407	Respiration Electron accepting reactions Terminal_cytochrome_C_oxidases Cytochrome c oxidase subunit CcoQ (EC 1.9.3.1)		cytochrome c oxidase cbb3-type subunit IV
395	GCA_003851495.1_04515	Pseudomonas synxantha 2-79(GCA_003851495.1)	1	5.0					hypothetical protein
396	GCA_003851925.1_03215	Pseudomonas chlororaphis subsp. aureofaciens ChPhzTR39(GCA_003851925.1)	1	5.0					hypothetical protein
397	GCA_000264555.1_02344	Pseudomonas chlororaphis subsp. aureofaciens O6(GCA_000264555.1)	20	100.0	S:COG4317				hypothetical protein
398	GCA_003851835.1_03447	Pseudomonas chlororaphis subsp. aurantiaca DSM 19603(Type)(GCA_003851835.1)	2	10.0					hypothetical protein
399	GCA_003851925.1_02083	Pseudomonas chlororaphis subsp. aureofaciens ChPhzTR39(GCA_003851925.1)	1	5.0					hypothetical protein
400	GCA_000264555.1_05341	Pseudomonas chlororaphis subsp. aureofaciens O6(GCA_000264555.1)	20	100.0	S:ENOG410XXPU				hypothetical protein
401	GCA_000698865.1_05513	Pseudomonas chlororaphis subsp. aureofaciens PA23(GCA_000698865.1)	1	5.0	T:COG1551	K03563	Stress Response null Carbon_Starvation Carbon storage regulator	GO:0003723,GO:0006402,GO:0006109	Carbon storage regulator homolog 1	RNA-binding.	Could accelerate the degradation of some genes transcripts potentially through selective RNA binding
402	GCA_003851495.1_01805	Pseudomonas synxantha 2-79(GCA_003851495.1)	1	5.0					hypothetical protein
403	GCA_000264555.1_05305	Pseudomonas chlororaphis subsp. aureofaciens O6(GCA_000264555.1)	20	100.0	S:ENOG410XX6T				hypothetical protein
404	GCA_003851495.1_01580	Pseudomonas synxantha 2-79(GCA_003851495.1)	1	5.0					hypothetical protein
405	GCA_000264555.1_02766	Pseudomonas chlororaphis subsp. aureofaciens O6(GCA_000264555.1)	8	40.0					hypothetical protein
406	GCA_003851495.1_00945	Pseudomonas synxantha 2-79(GCA_003851495.1)	1	5.0					hypothetical protein
407	GCA_000264555.1_04861	Pseudomonas chlororaphis subsp. aureofaciens O6(GCA_000264555.1)	19	95.0					hypothetical protein
408	GCA_000264555.1_01234	Pseudomonas chlororaphis subsp. aureofaciens O6(GCA_000264555.1)	1	5.0					hypothetical protein
409	GCA_003851495.1_01531	Pseudomonas synxantha 2-79(GCA_003851495.1)	1	5.0					hypothetical protein
410	GCA_003851495.1_02142	Pseudomonas synxantha 2-79(GCA_003851495.1)	1	5.0					hypothetical protein
411	GCA_003851495.1_02942	Pseudomonas synxantha 2-79(GCA_003851495.1)	1	5.0					hypothetical protein
412	GCA_003851835.1_04236	Pseudomonas chlororaphis subsp. aurantiaca DSM 19603(Type)(GCA_003851835.1)	1	5.0	I:COG1024	K01692	Carbohydrates Fermentation Butanol_Biosynthesis Enoyl-CoA hydratase (EC 4.2.1.17)	GO:0008935,GO:0009234	Enoyl-CoA hydratase	Lyase
413	GCA_000264555.1_06041	Pseudomonas chlororaphis subsp. aureofaciens O6(GCA_000264555.1)	1	5.0	L:COG4644				hypothetical protein
414	GCA_000264555.1_01639	Pseudomonas chlororaphis subsp. aureofaciens O6(GCA_000264555.1)	20	100.0	S:ENOG410YYW8				hypothetical protein
415	GCA_000264555.1_04898	Pseudomonas chlororaphis subsp. aureofaciens O6(GCA_000264555.1)	20	100.0					hypothetical protein
416	GCA_000264555.1_02884	Pseudomonas chlororaphis subsp. aureofaciens O6(GCA_000264555.1)	20	100.0					hypothetical protein
417	GCA_003851405.1_04249	Pseudomonas chlororaphis subsp. aureofaciens 66(GCA_003851405.1)	1	5.0					hypothetical protein
418	GCA_000264555.1_02121	Pseudomonas chlororaphis subsp. aureofaciens O6(GCA_000264555.1)	2	10.0		K22302			hypothetical protein
419	GCA_003850565.1_01252	CP027706_s CMR12a(GCA_003850565.1)	1	5.0	S:ENOG410ZPTW				hypothetical protein
420	GCA_003850365.1_02629	Pseudomonas chlororaphis subsp. piscium ATCC 17809(GCA_003850365.1)	6	30.0					hypothetical protein
421	GCA_003851345.1_00800	Pseudomonas chlororaphis subsp. aurantiaca Q16(GCA_003851345.1)	3	15.0	S:ENOG410Y553				hypothetical protein
422	GCA_000264555.1_04622	Pseudomonas chlororaphis subsp. aureofaciens O6(GCA_000264555.1)	20	100.0					hypothetical protein
423	GCA_000963835.1_01269	CP010892_s PCL1606(GCA_000963835.1)	4	20.0					hypothetical protein
424	GCA_000264555.1_02049	Pseudomonas chlororaphis subsp. aureofaciens O6(GCA_000264555.1)	20	100.0					hypothetical protein
425	GCA_000264555.1_03591	Pseudomonas chlororaphis subsp. aureofaciens O6(GCA_000264555.1)	2	10.0					hypothetical protein
426	GCA_000264555.1_04507	Pseudomonas chlororaphis subsp. aureofaciens O6(GCA_000264555.1)	20	100.0					hypothetical protein
427	GCA_003851495.1_01972	Pseudomonas synxantha 2-79(GCA_003851495.1)	1	5.0					hypothetical protein
428	GCA_003850565.1_05015	CP027706_s CMR12a(GCA_003850565.1)	1	5.0					hypothetical protein
429	GCA_003851495.1_04714	Pseudomonas synxantha 2-79(GCA_003851495.1)	1	5.0					hypothetical protein
430	GCA_000264555.1_01382	Pseudomonas chlororaphis subsp. aureofaciens O6(GCA_000264555.1)	20	100.0					hypothetical protein
431	GCA_003851495.1_04381	Pseudomonas synxantha 2-79(GCA_003851495.1)	1	5.0					hypothetical protein
432	GCA_003850365.1_03730	Pseudomonas chlororaphis subsp. piscium ATCC 17809(GCA_003850365.1)	1	5.0					hypothetical protein
433	GCA_000264555.1_05587	Pseudomonas chlororaphis subsp. aureofaciens O6(GCA_000264555.1)	20	100.0	J:COG1841	K02907	Protein Metabolism Protein biosynthesis Ribosome_LSU_bacterial LSU ribosomal protein L30p (L7e)	GO:0015934,GO:0003735,GO:0006412	50S ribosomal protein L30	Ribonucleoprotein
434	GCA_000264555.1_00706	Pseudomonas chlororaphis subsp. aureofaciens O6(GCA_000264555.1)	20	100.0					hypothetical protein
435	GCA_000963835.1_03742	CP010892_s PCL1606(GCA_000963835.1)	1	5.0					hypothetical protein
436	GCA_003851925.1_00807	Pseudomonas chlororaphis subsp. aureofaciens ChPhzTR39(GCA_003851925.1)	1	5.0	S:ENOG410XTYU				hypothetical protein
437	GCA_003851165.1_03350	Pseudomonas chlororaphis subsp. aurantiaca M12(GCA_003851165.1)	5	25.0					hypothetical protein
438	GCA_003851495.1_03408	Pseudomonas synxantha 2-79(GCA_003851495.1)	1	5.0					hypothetical protein
439	GCA_000264555.1_01521	Pseudomonas chlororaphis subsp. aureofaciens O6(GCA_000264555.1)	7	35.0					hypothetical protein
440	GCA_003850565.1_02553	CP027706_s CMR12a(GCA_003850565.1)	1	5.0					hypothetical protein
441	GCA_000264555.1_02287	Pseudomonas chlororaphis subsp. aureofaciens O6(GCA_000264555.1)	11	55.0	S:ENOG410ZIWA				hypothetical protein
442	GCA_000264555.1_04830	Pseudomonas chlororaphis subsp. aureofaciens O6(GCA_000264555.1)	19	95.0					hypothetical protein
443	GCA_000264555.1_00278	Pseudomonas chlororaphis subsp. aureofaciens O6(GCA_000264555.1)	17	85.0	S:ENOG410ZIWA				hypothetical protein
444	GCA_003851345.1_04317	Pseudomonas chlororaphis subsp. aurantiaca Q16(GCA_003851345.1)	1	5.0	S:COG0300	K07124	Clustering-based subsystems Fatty acid metabolic cluster CBSS-246196.1.peg.364 3-oxoacyl-[acyl-carrier protein] reductase (EC 1.1.1.100)		hypothetical protein
445	GCA_000963835.1_03003	CP010892_s PCL1606(GCA_000963835.1)	1	5.0					hypothetical protein
446	GCA_003850365.1_05219	Pseudomonas chlororaphis subsp. piscium ATCC 17809(GCA_003850365.1)	1	5.0					hypothetical protein
447	GCA_003851495.1_04792	Pseudomonas synxantha 2-79(GCA_003851495.1)	1	5.0					hypothetical protein
448	GCA_000264555.1_01282	Pseudomonas chlororaphis subsp. aureofaciens O6(GCA_000264555.1)	19	95.0	S:ENOG410XWUE				hypothetical protein
449	GCA_000281915.1_01532	Pseudomonas chlororaphis subsp. chlororaphis 30-84(GCA_000281915.1)	2	10.0	N:COG1724				hypothetical protein
450	GCA_000264555.1_05161	Pseudomonas chlororaphis subsp. aureofaciens O6(GCA_000264555.1)	20	100.0	S:ENOG410XV4J				hypothetical protein
451	GCA_000264555.1_01895	Pseudomonas chlororaphis subsp. aureofaciens O6(GCA_000264555.1)	20	100.0	J:COG0333	K02911	Protein Metabolism Protein biosynthesis Ribosome_LSU_bacterial LSU ribosomal protein L32p	GO:0015934,GO:0003735,GO:0006412	50S ribosomal protein L32	Ribonucleoprotein
452	GCA_000264555.1_01254	Pseudomonas chlororaphis subsp. aureofaciens O6(GCA_000264555.1)	8	40.0	S:COG4723		Phages, Prophages, Transposable elements, Plasmids Phages, Prophages Phage_tail_proteins_2 Phage tail assembly protein I	GO:0030430,GO:0019076	Tail tip assembly protein I	Host cytoplasm
453	GCA_000963835.1_00577	CP010892_s PCL1606(GCA_000963835.1)	4	20.0	L:ENOG4112C6R	K07339		GO:0004519,GO:0003729	Probable mRNA interferase HicA	Endonuclease
454	GCA_003851495.1_01074	Pseudomonas synxantha 2-79(GCA_003851495.1)	1	5.0	L:COG3077	K07473	Regulation and Cell signaling Programmed Cell Death and Toxin-antitoxin Systems Toxin-antitoxin_systems_(other_than_RelBE_and_MazEF) DNA-damage-inducible protein J		hypothetical protein
455	GCA_000264555.1_01360	Pseudomonas chlororaphis subsp. aureofaciens O6(GCA_000264555.1)	3	15.0					hypothetical protein
456	GCA_003851495.1_00355	Pseudomonas synxantha 2-79(GCA_003851495.1)	1	5.0					hypothetical protein
457	GCA_003851495.1_00318	Pseudomonas synxantha 2-79(GCA_003851495.1)	1	5.0					hypothetical protein
458	GCA_003850365.1_04933	Pseudomonas chlororaphis subsp. piscium ATCC 17809(GCA_003850365.1)	1	5.0					hypothetical protein
459	GCA_000264555.1_01880	Pseudomonas chlororaphis subsp. aureofaciens O6(GCA_000264555.1)	20	100.0	S:COG2835	K09791	Miscellaneous null Broadly_distributed_proteins_not_in_subsystems UPF0434 protein YcaR		UPF0434 protein PputGB1_1477		Belongs to the UPF0434 family.
460	GCA_003850565.1_01184	CP027706_s CMR12a(GCA_003850565.1)	1	5.0					hypothetical protein
461	GCA_001921865.1_01538	MSCT_s PCL1601(GCA_001921865.1)	1	5.0					hypothetical protein
462	GCA_000698865.1_05431	Pseudomonas chlororaphis subsp. aureofaciens PA23(GCA_000698865.1)	1	5.0					hypothetical protein
463	GCA_000264555.1_02619	Pseudomonas chlororaphis subsp. aureofaciens O6(GCA_000264555.1)	17	85.0					hypothetical protein
464	GCA_003851495.1_01800	Pseudomonas synxantha 2-79(GCA_003851495.1)	1	5.0	M:COG2853	K04754			hypothetical protein
465	GCA_003851495.1_01264	Pseudomonas synxantha 2-79(GCA_003851495.1)	1	5.0					hypothetical protein
466	GCA_003850565.1_04346	CP027706_s CMR12a(GCA_003850565.1)	1	5.0					hypothetical protein
467	GCA_000264555.1_05143	Pseudomonas chlororaphis subsp. aureofaciens O6(GCA_000264555.1)	17	85.0					hypothetical protein
468	GCA_003851905.1_03517	Pseudomonas chlororaphis subsp. aureofaciens DSM 6698(Type)(GCA_003851905.1)	1	5.0					hypothetical protein
469	GCA_001921865.1_02544	MSCT_s PCL1601(GCA_001921865.1)	1	5.0	E:COG1280		Amino Acids and Derivatives Lysine, threonine, methionine, and cysteine Lysine_degradation L-lysine permease		hypothetical protein
470	GCA_003851905.1_04160	Pseudomonas chlororaphis subsp. aureofaciens DSM 6698(Type)(GCA_003851905.1)	1	5.0					hypothetical protein
471	GCA_000264555.1_00586	Pseudomonas chlororaphis subsp. aureofaciens O6(GCA_000264555.1)	18	90.0					hypothetical protein
472	GCA_000963835.1_02764	CP010892_s PCL1606(GCA_000963835.1)	1	5.0	C:COG0604	K00344	Miscellaneous null ZZ_gjo_need_homes Quinone oxidoreductase (EC 1.6.5.5)		NADPH:quinone reductase		KEGG: bid:Bind_3028 NADPH2:quinone reductase
473	GCA_000264555.1_03290	Pseudomonas chlororaphis subsp. aureofaciens O6(GCA_000264555.1)	18	90.0	S:COG3729	K06884			hypothetical protein
474	GCA_000264555.1_01691	Pseudomonas chlororaphis subsp. aureofaciens O6(GCA_000264555.1)	20	100.0					hypothetical protein
475	GCA_000264555.1_05412	Pseudomonas chlororaphis subsp. aureofaciens O6(GCA_000264555.1)	10	50.0	S:COG3549	K07334	Regulation and Cell signaling Programmed Cell Death and Toxin-antitoxin Systems Toxin-antitoxin_systems_(other_than_RelBE_and_MazEF) HigB toxin protein	GO:0004521,GO:0003729,GO:0043022,GO:0030371,GO:0006379,GO:0030308,GO:0008285,GO:0017148,GO:0006401,GO:0090502	Endoribonuclease HigB	Endonuclease
476	GCA_003850565.1_01254	CP027706_s CMR12a(GCA_003850565.1)	1	5.0					hypothetical protein
477	GCA_003851495.1_05557	Pseudomonas synxantha 2-79(GCA_003851495.1)	1	5.0	P:ENOG410XPF7	K02014	Membrane Transport null Ton_and_Tol_transport_systems TonB-dependent receptor		hypothetical protein
478	GCA_000264555.1_00210	Pseudomonas chlororaphis subsp. aureofaciens O6(GCA_000264555.1)	20	100.0	S:COG5583				hypothetical protein
479	GCA_000264555.1_04094	Pseudomonas chlororaphis subsp. aureofaciens O6(GCA_000264555.1)	20	100.0					hypothetical protein
480	GCA_003850565.1_04877	CP027706_s CMR12a(GCA_003850565.1)	1	5.0					hypothetical protein
481	GCA_003851905.1_03499	Pseudomonas chlororaphis subsp. aureofaciens DSM 6698(Type)(GCA_003851905.1)	1	5.0					hypothetical protein
482	GCA_003850365.1_04895	Pseudomonas chlororaphis subsp. piscium ATCC 17809(GCA_003850365.1)	1	5.0					hypothetical protein
483	GCA_000264555.1_05722	Pseudomonas chlororaphis subsp. aureofaciens O6(GCA_000264555.1)	20	100.0	S:ENOG410Y88Z				hypothetical protein
484	GCA_000264555.1_02275	Pseudomonas chlororaphis subsp. aureofaciens O6(GCA_000264555.1)	19	95.0	S:ENOG410Y8A8				hypothetical protein
485	GCA_000264555.1_02139	Pseudomonas chlororaphis subsp. aureofaciens O6(GCA_000264555.1)	3	15.0					hypothetical protein
486	GCA_003850565.1_03117	CP027706_s CMR12a(GCA_003850565.1)	1	5.0					hypothetical protein
487	GCA_000264555.1_04630	Pseudomonas chlororaphis subsp. aureofaciens O6(GCA_000264555.1)	20	100.0	T:COG1551	K03563	Stress Response null Carbon_Starvation Carbon storage regulator	GO:0003723,GO:0006402,GO:0006109	Carbon storage regulator homolog 2	RNA-binding.	Could accelerate the degradation of some genes transcripts potentially through selective RNA binding
488	GCA_000264555.1_06039	Pseudomonas chlororaphis subsp. aureofaciens O6(GCA_000264555.1)	1	5.0					hypothetical protein
489	GCA_000264555.1_03527	Pseudomonas chlororaphis subsp. aureofaciens O6(GCA_000264555.1)	19	95.0					hypothetical protein
490	GCA_000264555.1_01958	Pseudomonas chlororaphis subsp. aureofaciens O6(GCA_000264555.1)	15	75.0					hypothetical protein
491	GCA_003851205.1_03119	Pseudomonas chlororaphis subsp. aurantiaca 449(GCA_003851205.1)	4	20.0					hypothetical protein
492	GCA_003850365.1_04886	Pseudomonas chlororaphis subsp. piscium ATCC 17809(GCA_003850365.1)	2	10.0					hypothetical protein
493	GCA_000264555.1_01954	Pseudomonas chlororaphis subsp. aureofaciens O6(GCA_000264555.1)	19	95.0					hypothetical protein
494	GCA_000264555.1_04570	Pseudomonas chlororaphis subsp. aureofaciens O6(GCA_000264555.1)	20	100.0					hypothetical protein
495	GCA_000264555.1_03946	Pseudomonas chlororaphis subsp. aureofaciens O6(GCA_000264555.1)	16	80.0					hypothetical protein
496	GCA_000264555.1_04776	Pseudomonas chlororaphis subsp. aureofaciens O6(GCA_000264555.1)	17	85.0	S:ENOG410ZANC	K02651			pilus assembly protein Flp/PilA
497	GCA_000264555.1_06076	Pseudomonas chlororaphis subsp. aureofaciens O6(GCA_000264555.1)	1	5.0	L:COG4644				hypothetical protein
498	GCA_000264555.1_02464	Pseudomonas chlororaphis subsp. aureofaciens O6(GCA_000264555.1)	20	100.0	S:ENOG410Z367	K06938			uncharacterized protein
499	GCA_003851265.1_03516	Pseudomonas chlororaphis subsp. aurantiaca M71(GCA_003851265.1)	1	5.0					hypothetical protein
500	GCA_000264555.1_02774	Pseudomonas chlororaphis subsp. aureofaciens O6(GCA_000264555.1)	18	90.0					hypothetical protein
501	GCA_003851495.1_04204	Pseudomonas synxantha 2-79(GCA_003851495.1)	1	5.0					hypothetical protein
502	GCA_003851205.1_01841	Pseudomonas chlororaphis subsp. aurantiaca 449(GCA_003851205.1)	1	5.0					hypothetical protein
503	GCA_003850565.1_01198	CP027706_s CMR12a(GCA_003850565.1)	2	10.0					hypothetical protein
504	GCA_000264555.1_00891	Pseudomonas chlororaphis subsp. aureofaciens O6(GCA_000264555.1)	19	95.0					hypothetical protein
505	GCA_000264555.1_05597	Pseudomonas chlororaphis subsp. aureofaciens O6(GCA_000264555.1)	20	100.0	J:COG0255	K02904	Protein Metabolism Protein biosynthesis Ribosome_LSU_bacterial LSU ribosomal protein L29p (L35e)	GO:0005840,GO:0003735,GO:0006412	50S ribosomal protein L29	Ribonucleoprotein
506	GCA_000264555.1_01245	Pseudomonas chlororaphis subsp. aureofaciens O6(GCA_000264555.1)	1	5.0					hypothetical protein
507	GCA_000281915.1_04929	Pseudomonas chlororaphis subsp. chlororaphis 30-84(GCA_000281915.1)	3	15.0					hypothetical protein
508	GCA_000264555.1_03860	Pseudomonas chlororaphis subsp. aureofaciens O6(GCA_000264555.1)	20	100.0	S:ENOG410XWV5				hypothetical protein
509	GCA_003851345.1_02716	Pseudomonas chlororaphis subsp. aurantiaca Q16(GCA_003851345.1)	1	5.0					hypothetical protein
510	GCA_003851495.1_02160	Pseudomonas synxantha 2-79(GCA_003851495.1)	1	5.0					hypothetical protein
511	GCA_000264555.1_02998	Pseudomonas chlororaphis subsp. aureofaciens O6(GCA_000264555.1)	20	100.0					hypothetical protein
512	GCA_003850585.1_02444	Pseudomonas chlororaphis subsp. piscium ToZa7(GCA_003850585.1)	1	5.0					hypothetical protein
513	GCA_003850445.1_06072	Pseudomonas chlororaphis subsp. piscium PCL1391(GCA_003850445.1)	1	5.0					hypothetical protein
514	GCA_000264555.1_04466	Pseudomonas chlororaphis subsp. aureofaciens O6(GCA_000264555.1)	20	100.0	S:ENOG410XVIX				hypothetical protein
515	GCA_000264555.1_01225	Pseudomonas chlororaphis subsp. aureofaciens O6(GCA_000264555.1)	1	5.0					hypothetical protein
516	GCA_000264555.1_03735	Pseudomonas chlororaphis subsp. aureofaciens O6(GCA_000264555.1)	5	25.0	S:COG1942	K01821	Metabolism of Aromatic Compounds Metabolism of central aromatic intermediates Central_meta-cleavage_pathway_of_aromatic_compound_degradation 4-oxalocrotonate tautomerase (EC 5.3.2.-)		2-hydroxymuconate tautomerase		KEGG: rpln:B1209_23860 4-oxalocrotonate tautomerase
517	GCA_000963835.1_01037	CP010892_s PCL1606(GCA_000963835.1)	1	5.0					hypothetical protein
518	GCA_000264555.1_00191	Pseudomonas chlororaphis subsp. aureofaciens O6(GCA_000264555.1)	19	95.0					hypothetical protein
519	GCA_000264555.1_04712	Pseudomonas chlororaphis subsp. aureofaciens O6(GCA_000264555.1)	19	95.0	S:COG3237				UPF0337 protein mlr2098		Belongs to the UPF0337 (CsbD) family.
520	GCA_000264555.1_04777	Pseudomonas chlororaphis subsp. aureofaciens O6(GCA_000264555.1)	17	85.0	S:ENOG410ZANC	K02651			pilus assembly protein Flp/PilA
521	GCA_000264555.1_02191	Pseudomonas chlororaphis subsp. aureofaciens O6(GCA_000264555.1)	20	100.0					hypothetical protein
522	GCA_000963835.1_02503	CP010892_s PCL1606(GCA_000963835.1)	1	5.0	P:ENOG410XUQ1	K07213	Virulence, Disease and Defense Resistance to antibiotics and toxic compounds Copper_homeostasis Copper chaperone		copper chaperone
523	GCA_003851925.1_03468	Pseudomonas chlororaphis subsp. aureofaciens ChPhzTR39(GCA_003851925.1)	1	5.0	P:COG2822	K07224	Iron acquisition and metabolism null Ferrous_iron_transporter_EfeUOB,_low-pH-induced Ferrous iron transport periplasmic protein EfeO, contains peptidase-M75 domain and (frequently) cupredoxin-like domain		hypothetical protein
524	GCA_000264555.1_04093	Pseudomonas chlororaphis subsp. aureofaciens O6(GCA_000264555.1)	20	100.0					hypothetical protein
525	GCA_003851925.1_02271	Pseudomonas chlororaphis subsp. aureofaciens ChPhzTR39(GCA_003851925.1)	1	5.0	O:COG0625	K11209	Stress Response Oxidative stress Glutathione:_Non-redox_reactions Glutathione S-transferase (EC 2.5.1.18)		hypothetical protein		KEGG: ekb:BFV64_17765 GSH-dependent disulfide-bond oxidoreductase
526	GCA_000264555.1_02238	Pseudomonas chlororaphis subsp. aureofaciens O6(GCA_000264555.1)	20	100.0	T:COG1551	K03563	Stress Response null Carbon_Starvation Carbon storage regulator	GO:0003723,GO:0006402,GO:0006109	Carbon storage regulator homolog 2	RNA-binding.	Could accelerate the degradation of some genes transcripts potentially through selective RNA binding
527	GCA_003851925.1_05727	Pseudomonas chlororaphis subsp. aureofaciens ChPhzTR39(GCA_003851925.1)	1	5.0					hypothetical protein
528	GCA_000963835.1_05677	CP010892_s PCL1606(GCA_000963835.1)	7	35.0					hypothetical protein
529	GCA_003850365.1_03802	Pseudomonas chlororaphis subsp. piscium ATCC 17809(GCA_003850365.1)	2	10.0					hypothetical protein
530	GCA_000264555.1_02099	Pseudomonas chlororaphis subsp. aureofaciens O6(GCA_000264555.1)	4	20.0					hypothetical protein
531	GCA_000264555.1_03652	Pseudomonas chlororaphis subsp. aureofaciens O6(GCA_000264555.1)	12	60.0					hypothetical protein
532	GCA_000264555.1_02116	Pseudomonas chlororaphis subsp. aureofaciens O6(GCA_000264555.1)	1	5.0					hypothetical protein
533	GCA_003850565.1_05351	CP027706_s CMR12a(GCA_003850565.1)	1	5.0					hypothetical protein
534	GCA_003850565.1_05592	CP027706_s CMR12a(GCA_003850565.1)	1	5.0					hypothetical protein
535	GCA_001921865.1_00896	MSCT_s PCL1601(GCA_001921865.1)	1	5.0					hypothetical protein
536	GCA_000264555.1_02258	Pseudomonas chlororaphis subsp. aureofaciens O6(GCA_000264555.1)	20	100.0	J:COG0291	K02916	Protein Metabolism Protein biosynthesis Ribosome_LSU_bacterial LSU ribosomal protein L35p	GO:0005840,GO:0003735,GO:0006412	50S ribosomal protein L35	Ribonucleoprotein
537	GCA_003850465.1_00656	Pseudomonas chlororaphis subsp. piscium PCL1607(GCA_003850465.1)	2	10.0					hypothetical protein
538	GCA_000264555.1_01305	Pseudomonas chlororaphis subsp. aureofaciens O6(GCA_000264555.1)	17	85.0					hypothetical protein
539	GCA_000264555.1_02629	Pseudomonas chlororaphis subsp. aureofaciens O6(GCA_000264555.1)	19	95.0					hypothetical protein
540	GCA_001921865.1_02639	MSCT_s PCL1601(GCA_001921865.1)	1	5.0					hypothetical protein
541	GCA_003850565.1_01997	CP027706_s CMR12a(GCA_003850565.1)	1	5.0					hypothetical protein
542	GCA_000264555.1_02110	Pseudomonas chlororaphis subsp. aureofaciens O6(GCA_000264555.1)	3	15.0					hypothetical protein
543	GCA_003850565.1_04858	CP027706_s CMR12a(GCA_003850565.1)	1	5.0					hypothetical protein
544	GCA_000264555.1_02111	Pseudomonas chlororaphis subsp. aureofaciens O6(GCA_000264555.1)	4	20.0					hypothetical protein
545	GCA_000264555.1_06034	Pseudomonas chlororaphis subsp. aureofaciens O6(GCA_000264555.1)	1	5.0					hypothetical protein
546	GCA_001921865.1_00544	MSCT_s PCL1601(GCA_001921865.1)	1	5.0					hypothetical protein
547	GCA_000264555.1_05397	Pseudomonas chlororaphis subsp. aureofaciens O6(GCA_000264555.1)	20	100.0	S:COG2879				Uncharacterized protein YbdD		To E.coli YjiX.
548	GCA_003851495.1_00296	Pseudomonas synxantha 2-79(GCA_003851495.1)	1	5.0					hypothetical protein
549	GCA_000264555.1_04112	Pseudomonas chlororaphis subsp. aureofaciens O6(GCA_000264555.1)	15	75.0	K:COG1476	K07729	Amino Acids and Derivatives Branched-chain amino acids Ketoisovalerate_oxidoreductase Transcriptional regulator, Hth-3 family	GO:0043565,GO:0006355,GO:0006351	Uncharacterized HTH-type transcriptional regulator YgzD	DNA-binding
550	GCA_000264555.1_02970	Pseudomonas chlororaphis subsp. aureofaciens O6(GCA_000264555.1)	18	90.0	S:COG4886	K05747			Wiskott-Aldrich syndrome protein
551	GCA_000963835.1_04497	CP010892_s PCL1606(GCA_000963835.1)	1	5.0					hypothetical protein
552	GCA_001921865.1_04908	MSCT_s PCL1601(GCA_001921865.1)	1	5.0					hypothetical protein
553	GCA_003850365.1_03983	Pseudomonas chlororaphis subsp. piscium ATCC 17809(GCA_003850365.1)	1	5.0					hypothetical protein
554	GCA_000264555.1_01004	Pseudomonas chlororaphis subsp. aureofaciens O6(GCA_000264555.1)	20	100.0	S:ENOG410XWDA				hypothetical protein
555	GCA_000963835.1_02607	CP010892_s PCL1606(GCA_000963835.1)	2	10.0					hypothetical protein
556	GCA_003851495.1_02950	Pseudomonas synxantha 2-79(GCA_003851495.1)	1	5.0					hypothetical protein
557	GCA_003851405.1_02117	Pseudomonas chlororaphis subsp. aureofaciens 66(GCA_003851405.1)	1	5.0		K07726			hypothetical protein
558	GCA_003850445.1_03354	Pseudomonas chlororaphis subsp. piscium PCL1391(GCA_003850445.1)	3	15.0					hypothetical protein
559	GCA_003851495.1_02166	Pseudomonas synxantha 2-79(GCA_003851495.1)	1	5.0					hypothetical protein
560	GCA_003851345.1_02238	Pseudomonas chlororaphis subsp. aurantiaca Q16(GCA_003851345.1)	3	15.0	S:ENOG41123QP				hypothetical protein
561	GCA_003851925.1_01930	Pseudomonas chlororaphis subsp. aureofaciens ChPhzTR39(GCA_003851925.1)	1	5.0					hypothetical protein
562	GCA_000264555.1_03716	Pseudomonas chlororaphis subsp. aureofaciens O6(GCA_000264555.1)	5	25.0	M:COG1538	K18139	Virulence, Disease and Defense Resistance to antibiotics and toxic compounds Multidrug_Resistance_Efflux_Pumps RND efflux system, outer membrane lipoprotein CmeC	GO:0009279,GO:0016021,GO:0008289,GO:0005215,GO:0046677	Antibiotic efflux pump outer membrane protein ArpC	Antibiotic resistance
563	GCA_003851905.1_02515	Pseudomonas chlororaphis subsp. aureofaciens DSM 6698(Type)(GCA_003851905.1)	1	5.0					hypothetical protein
564	GCA_000264555.1_00704	Pseudomonas chlororaphis subsp. aureofaciens O6(GCA_000264555.1)	20	100.0	P:ENOG410XUQ1	K07213	Virulence, Disease and Defense Resistance to antibiotics and toxic compounds Copper_homeostasis Copper chaperone		copper chaperone
565	GCA_003851495.1_05278	Pseudomonas synxantha 2-79(GCA_003851495.1)	1	5.0					hypothetical protein
566	GCA_003851345.1_01356	Pseudomonas chlororaphis subsp. aurantiaca Q16(GCA_003851345.1)	1	5.0					hypothetical protein
567	GCA_000698865.1_05460	Pseudomonas chlororaphis subsp. aureofaciens PA23(GCA_000698865.1)	1	5.0		K13450			phosphothreonine lyase		KEGG: pch:EY04_27615 phosphothreonine lyase
568	GCA_003850565.1_03106	CP027706_s CMR12a(GCA_003850565.1)	1	5.0					hypothetical protein
569	GCA_003851495.1_04719	Pseudomonas synxantha 2-79(GCA_003851495.1)	1	5.0					hypothetical protein
570	GCA_000264555.1_03548	Pseudomonas chlororaphis subsp. aureofaciens O6(GCA_000264555.1)	20	100.0					hypothetical protein
571	GCA_000264555.1_01342	Pseudomonas chlororaphis subsp. aureofaciens O6(GCA_000264555.1)	20	100.0	S:ENOG4112ANN	K03545	Regulation and Cell signaling null Zinc_regulated_enzymes Putative metal chaperone, involved in Zn homeostasis, GTPase of COG0523 family	GO:0005737,GO:0005886,GO:0005524,GO:0046872,GO:0065002,GO:0017038,GO:0006605	Protein translocase subunit SecA	ATP-binding
572	GCA_000698865.1_06174	Pseudomonas chlororaphis subsp. aureofaciens PA23(GCA_000698865.1)	7	35.0					hypothetical protein
573	GCA_000698865.1_05525	Pseudomonas chlororaphis subsp. aureofaciens PA23(GCA_000698865.1)	1	5.0		K03563			carbon storage regulator
574	GCA_000264555.1_04999	Pseudomonas chlororaphis subsp. aureofaciens O6(GCA_000264555.1)	20	100.0	S:COG2975		RNA Metabolism RNA processing and modification tRNA_modification_Bacteria Believed to be involved in assembly of Fe-S clusters	GO:0016226	Uncharacterized protein PA3808		To E.coli YfhJ.
575	GCA_000264555.1_02122	Pseudomonas chlororaphis subsp. aureofaciens O6(GCA_000264555.1)	2	10.0					hypothetical protein
576	GCA_003851405.1_02116	Pseudomonas chlororaphis subsp. aureofaciens 66(GCA_003851405.1)	2	10.0					hypothetical protein
577	GCA_003851495.1_05320	Pseudomonas synxantha 2-79(GCA_003851495.1)	1	5.0					hypothetical protein
578	GCA_003851495.1_02317	Pseudomonas synxantha 2-79(GCA_003851495.1)	1	5.0	S:COG4226				hypothetical protein
579	GCA_003851495.1_03969	Pseudomonas synxantha 2-79(GCA_003851495.1)	1	5.0	K:COG1278	K03704	Stress Response Cold shock Cold_shock,_CspA_family_of_proteins Cold shock protein CspA	GO:0005737,GO:0003677,GO:0006355,GO:0006351	Probable cold shock protein A	Activator
580	GCA_000264555.1_02101	Pseudomonas chlororaphis subsp. aureofaciens O6(GCA_000264555.1)	2	10.0					hypothetical protein
581	GCA_003851495.1_04369	Pseudomonas synxantha 2-79(GCA_003851495.1)	1	5.0					hypothetical protein
582	GCA_003851785.1_03641	Pseudomonas chlororaphis subsp. aureofaciens Pb-St2(GCA_003851785.1)	1	5.0	S:COG1942	K01821	Metabolism of Aromatic Compounds Metabolism of central aromatic intermediates Central_meta-cleavage_pathway_of_aromatic_compound_degradation 4-oxalocrotonate tautomerase (EC 5.3.2.-)	GO:0016853,GO:0042203,GO:0042184	2-hydroxymuconate tautomerase	Aromatic hydrocarbons catabolism
583	GCA_003851495.1_00755	Pseudomonas synxantha 2-79(GCA_003851495.1)	1	5.0					hypothetical protein
584	GCA_001921865.1_00876	MSCT_s PCL1601(GCA_001921865.1)	1	5.0					hypothetical protein
585	GCA_000963835.1_05768	CP010892_s PCL1606(GCA_000963835.1)	1	5.0					hypothetical protein
586	GCA_000264555.1_05324	Pseudomonas chlororaphis subsp. aureofaciens O6(GCA_000264555.1)	20	100.0	S:COG3024	K09862	Cofactors, Vitamins, Prosthetic Groups, Pigments Coenzyme A Coenzyme_A_Biosynthesis Dephospho-CoA kinase (EC 2.7.1.24)	GO:0008657,GO:0008270,GO:0006355	DNA gyrase inhibitor YacG	Metal-binding
587	GCA_003851495.1_03864	Pseudomonas synxantha 2-79(GCA_003851495.1)	1	5.0	T:COG1551	K03563	Stress Response null Carbon_Starvation Carbon storage regulator	GO:0003723,GO:0006402,GO:0006109	Carbon storage regulator like protein	RNA-binding.	Could accelerate the degradation of some genes transcripts potentially through selective RNA binding
588	GCA_003851495.1_03645	Pseudomonas synxantha 2-79(GCA_003851495.1)	1	5.0	K:ENOG410XPSF	K06145			hypothetical protein
589	GCA_003851785.1_03039	Pseudomonas chlororaphis subsp. aureofaciens Pb-St2(GCA_003851785.1)	1	5.0	S:COG3251	K05375	Virulence Resistance to antibiotics and toxic compounds Polymyxin_Synthetase_Gene_Cluster_in_Bacillus Polymyxin synthetase PmxB		uncharacterized protein
590	GCA_003851265.1_00366	Pseudomonas chlororaphis subsp. aurantiaca M71(GCA_003851265.1)	2	10.0					hypothetical protein
591	GCA_000963835.1_04181	CP010892_s PCL1606(GCA_000963835.1)	1	5.0					hypothetical protein
592	GCA_003850565.1_05674	CP027706_s CMR12a(GCA_003850565.1)	1	5.0					hypothetical protein
593	GCA_000264555.1_01510	Pseudomonas chlororaphis subsp. aureofaciens O6(GCA_000264555.1)	8	40.0	S:ENOG410XW0K			GO:0008270	Uncharacterized 8.5 kDa protein in gpA 5'region	Metal-binding
594	GCA_000264555.1_03437	Pseudomonas chlororaphis subsp. aureofaciens O6(GCA_000264555.1)	18	90.0	S:ENOG410XU8E	K21695			hypothetical protein
595	GCA_003850445.1_05936	Pseudomonas chlororaphis subsp. piscium PCL1391(GCA_003850445.1)	3	15.0					hypothetical protein
596	GCA_000264555.1_03549	Pseudomonas chlororaphis subsp. aureofaciens O6(GCA_000264555.1)	19	95.0					hypothetical protein
597	GCA_000698865.1_03463	Pseudomonas chlororaphis subsp. aureofaciens PA23(GCA_000698865.1)	1	5.0					hypothetical protein
598	GCA_000698865.1_03227	Pseudomonas chlororaphis subsp. aureofaciens PA23(GCA_000698865.1)	1	5.0					hypothetical protein
599	GCA_000264555.1_00069	Pseudomonas chlororaphis subsp. aureofaciens O6(GCA_000264555.1)	20	100.0	S:ENOG410XYWT				hypothetical protein
600	GCA_003850365.1_04929	Pseudomonas chlororaphis subsp. piscium ATCC 17809(GCA_003850365.1)	1	5.0					hypothetical protein
601	GCA_003850565.1_04347	CP027706_s CMR12a(GCA_003850565.1)	1	5.0					hypothetical protein
602	GCA_003851205.1_01844	Pseudomonas chlororaphis subsp. aurantiaca 449(GCA_003851205.1)	1	5.0					hypothetical protein
603	GCA_000963835.1_03187	CP010892_s PCL1606(GCA_000963835.1)	1	5.0					hypothetical protein
604	GCA_003851495.1_00892	Pseudomonas synxantha 2-79(GCA_003851495.1)	1	5.0	E:COG0329	K01707	Carbohydrates Monosaccharides D-Galacturonate_and_D-Glucuronate_Utilization 5-dehydro-4-deoxyglucarate dehydratase (EC 4.2.1.41)	GO:0047448,GO:0042838	5-dehydro-4-deoxyglucarate dehydratase	Lyase.	Belongs to the DapA family.
605	GCA_000264555.1_01205	Pseudomonas chlororaphis subsp. aureofaciens O6(GCA_000264555.1)	3	15.0					hypothetical protein
606	GCA_003851405.1_01851	Pseudomonas chlororaphis subsp. aureofaciens 66(GCA_003851405.1)	1	5.0					hypothetical protein
607	GCA_000264555.1_03078	Pseudomonas chlororaphis subsp. aureofaciens O6(GCA_000264555.1)	20	100.0	S:ENOG41122CP				hypothetical protein
608	GCA_000264555.1_04719	Pseudomonas chlororaphis subsp. aureofaciens O6(GCA_000264555.1)	19	95.0	S:ENOG410Y6SW				hypothetical protein
609	GCA_001921865.1_02334	MSCT_s PCL1601(GCA_001921865.1)	2	10.0					hypothetical protein
610	GCA_003850445.1_00776	Pseudomonas chlororaphis subsp. piscium PCL1391(GCA_003850445.1)	2	10.0					hypothetical protein
611	GCA_003851495.1_03275	Pseudomonas synxantha 2-79(GCA_003851495.1)	1	5.0	L:COG3436	K07484			hypothetical protein
612	GCA_003851205.1_01864	Pseudomonas chlororaphis subsp. aurantiaca 449(GCA_003851205.1)	1	5.0					hypothetical protein
613	GCA_003851495.1_03175	Pseudomonas synxantha 2-79(GCA_003851495.1)	1	5.0	S:ENOG410XVIX				hypothetical protein
614	GCA_000963835.1_05324	CP010892_s PCL1606(GCA_000963835.1)	4	20.0	U:ENOG410ZYQ5	K02651	Membrane Transport Protein secretion system, Type II Widespread_colonization_island Flp pilus assembly protein, pilin Flp		pilus assembly protein Flp/PilA
615	GCA_003851925.1_02524	Pseudomonas chlororaphis subsp. aureofaciens ChPhzTR39(GCA_003851925.1)	1	5.0					hypothetical protein
616	GCA_000264555.1_02123	Pseudomonas chlororaphis subsp. aureofaciens O6(GCA_000264555.1)	2	10.0					hypothetical protein
617	GCA_000264555.1_01537	Pseudomonas chlororaphis subsp. aureofaciens O6(GCA_000264555.1)	14	70.0	S:COG5004				hypothetical protein
618	GCA_000264555.1_01333	Pseudomonas chlororaphis subsp. aureofaciens O6(GCA_000264555.1)	20	100.0					hypothetical protein
619	GCA_003850565.1_01510	CP027706_s CMR12a(GCA_003850565.1)	1	5.0	S:COG5004				hypothetical protein
620	GCA_000264555.1_05164	Pseudomonas chlororaphis subsp. aureofaciens O6(GCA_000264555.1)	20	100.0					hypothetical protein
621	GCA_003850445.1_03999	Pseudomonas chlororaphis subsp. piscium PCL1391(GCA_003850445.1)	2	10.0					hypothetical protein
622	GCA_000963835.1_05224	CP010892_s PCL1606(GCA_000963835.1)	1	5.0	L:COG0582				hypothetical protein
623	GCA_000264555.1_04812	Pseudomonas chlororaphis subsp. aureofaciens O6(GCA_000264555.1)	20	100.0	S:COG2900	K03745			Protein SlyX homolog		Belongs to the SlyX family.
624	GCA_000264555.1_02886	Pseudomonas chlororaphis subsp. aureofaciens O6(GCA_000264555.1)	18	90.0					hypothetical protein
625	GCA_003851165.1_05894	Pseudomonas chlororaphis subsp. aurantiaca M12(GCA_003851165.1)	6	30.0					hypothetical protein
626	GCA_003851905.1_05793	Pseudomonas chlororaphis subsp. aureofaciens DSM 6698(Type)(GCA_003851905.1)	1	5.0					hypothetical protein
627	GCA_003851495.1_03278	Pseudomonas synxantha 2-79(GCA_003851495.1)	1	5.0					hypothetical protein
628	GCA_000963835.1_02585	CP010892_s PCL1606(GCA_000963835.1)	2	10.0					hypothetical protein
629	GCA_000264555.1_00717	Pseudomonas chlororaphis subsp. aureofaciens O6(GCA_000264555.1)	19	95.0	K:ENOG4112021	K13639	Stress Response Oxidative stress Oxidative_stress Redox-sensitive transcriptional activator SoxR		MerR family transcriptional regulator, redox-sensitive transcriptional activator SoxR
630	GCA_003850565.1_01490	CP027706_s CMR12a(GCA_003850565.1)	4	20.0	S:ENOG4111XR2				hypothetical protein
631	GCA_000698865.1_03036	Pseudomonas chlororaphis subsp. aureofaciens PA23(GCA_000698865.1)	4	20.0	S:ENOG41120WY				hypothetical protein
632	GCA_000264555.1_01331	Pseudomonas chlororaphis subsp. aureofaciens O6(GCA_000264555.1)	20	100.0	K:COG1278	K03704	Stress Response Cold shock Cold_shock,_CspA_family_of_proteins Cold shock protein CspA	GO:0005737,GO:0003677,GO:0006355,GO:0006351	Cold shock protein CapA	Activator
633	GCA_000264555.1_04155	Pseudomonas chlororaphis subsp. aureofaciens O6(GCA_000264555.1)	14	70.0	S:COG1942	K01821	Metabolism of Aromatic Compounds Metabolism of central aromatic intermediates Central_meta-cleavage_pathway_of_aromatic_compound_degradation 4-oxalocrotonate tautomerase (EC 5.3.2.-)	GO:0016853,GO:0006725	2-hydroxymuconate tautomerase	Isomerase.	Belongs to the 4-oxalocrotonate tautomerase family.
634	GCA_003851925.1_02383	Pseudomonas chlororaphis subsp. aureofaciens ChPhzTR39(GCA_003851925.1)	1	5.0	I:COG0688	K01613			Phosphatidylserine decarboxylase		KEGG: pch:EY04_11035 phosphatidylserine decarboxylase
635	GCA_003851205.1_03149	Pseudomonas chlororaphis subsp. aurantiaca 449(GCA_003851205.1)	3	15.0					hypothetical protein
636	GCA_003850585.1_04756	Pseudomonas chlororaphis subsp. piscium ToZa7(GCA_003850585.1)	1	5.0	D:ENOG410Z26V			GO:0005615,GO:0009289,GO:0009405	Hrp pili protein HrpA	Fimbrium
637	GCA_003851495.1_03971	Pseudomonas synxantha 2-79(GCA_003851495.1)	1	5.0	K:COG1278	K03704	Stress Response Cold shock Cold_shock,_CspA_family_of_proteins Cold shock protein CspA	GO:0005737,GO:0003677,GO:0006355,GO:0006351	Major cold shock protein	Activator
638	GCA_000281915.1_03138	Pseudomonas chlororaphis subsp. chlororaphis 30-84(GCA_000281915.1)	15	75.0	I:ENOG410XQZ4				hypothetical protein
639	GCA_003850365.1_02433	Pseudomonas chlororaphis subsp. piscium ATCC 17809(GCA_003850365.1)	2	10.0					hypothetical protein
640	GCA_000264555.1_06153	Pseudomonas chlororaphis subsp. aureofaciens O6(GCA_000264555.1)	9	45.0					hypothetical protein
641	GCA_003850565.1_05594	CP027706_s CMR12a(GCA_003850565.1)	1	5.0					hypothetical protein
642	GCA_003850365.1_03195	Pseudomonas chlororaphis subsp. piscium ATCC 17809(GCA_003850365.1)	1	5.0					hypothetical protein
643	GCA_003850365.1_01447	Pseudomonas chlororaphis subsp. piscium ATCC 17809(GCA_003850365.1)	1	5.0					hypothetical protein
644	GCA_000264555.1_00178	Pseudomonas chlororaphis subsp. aureofaciens O6(GCA_000264555.1)	19	95.0	S:ENOG410XX18				hypothetical protein
645	GCA_000264555.1_05955	Pseudomonas chlororaphis subsp. aureofaciens O6(GCA_000264555.1)	20	100.0	S:ENOG410XUCK	K09892			cell division protein ZapB
646	GCA_003851205.1_04057	Pseudomonas chlororaphis subsp. aurantiaca 449(GCA_003851205.1)	4	20.0	S:ENOG410XT44	K03418			N,N-dimethylformamidase		KEGG: buz:AYM40_16575 N,N-dimethylformamidase
647	GCA_000264555.1_00115	Pseudomonas chlororaphis subsp. aureofaciens O6(GCA_000264555.1)	18	90.0					hypothetical protein
648	GCA_003850365.1_03759	Pseudomonas chlororaphis subsp. piscium ATCC 17809(GCA_003850365.1)	2	10.0					hypothetical protein
649	GCA_003851265.1_04302	Pseudomonas chlororaphis subsp. aurantiaca M71(GCA_003851265.1)	1	5.0					hypothetical protein
650	GCA_003851165.1_04594	Pseudomonas chlororaphis subsp. aurantiaca M12(GCA_003851165.1)	1	5.0	S:COG3501	K11904	Membrane Transport Protein secretion system, Type VI Type_VI_secretion_systems VgrG protein		hypothetical protein
651	GCA_003851265.1_02079	Pseudomonas chlororaphis subsp. aurantiaca M71(GCA_003851265.1)	1	5.0	L:COG2801	K07497			hypothetical protein
652	GCA_000264555.1_03545	Pseudomonas chlororaphis subsp. aureofaciens O6(GCA_000264555.1)	18	90.0					hypothetical protein
653	GCA_003850565.1_03051	CP027706_s CMR12a(GCA_003850565.1)	1	5.0	S:ENOG410ZIBY	K19092			hypothetical protein
654	GCA_003851495.1_04239	Pseudomonas synxantha 2-79(GCA_003851495.1)	1	5.0					hypothetical protein
655	GCA_003851495.1_01802	Pseudomonas synxantha 2-79(GCA_003851495.1)	1	5.0					hypothetical protein
656	GCA_000264555.1_01154	Pseudomonas chlororaphis subsp. aureofaciens O6(GCA_000264555.1)	20	100.0	K:COG1278	K03704	Stress Response Cold shock Cold_shock,_CspA_family_of_proteins Cold shock protein CspE	GO:0005737,GO:0003677,GO:0006355,GO:0006351	Cold shock protein CapB	Activator
657	GCA_000264555.1_05456	Pseudomonas chlororaphis subsp. aureofaciens O6(GCA_000264555.1)	20	100.0	S:ENOG410XXP8				hypothetical protein
658	GCA_000698865.1_03013	Pseudomonas chlororaphis subsp. aureofaciens PA23(GCA_000698865.1)	2	10.0					hypothetical protein
659	GCA_000264555.1_03286	Pseudomonas chlororaphis subsp. aureofaciens O6(GCA_000264555.1)	16	80.0					hypothetical protein
660	GCA_001921865.1_01235	MSCT_s PCL1601(GCA_001921865.1)	1	5.0					hypothetical protein
661	GCA_003850565.1_05858	CP027706_s CMR12a(GCA_003850565.1)	1	5.0	S:ENOG410Y087				hypothetical protein
662	GCA_000264555.1_00690	Pseudomonas chlororaphis subsp. aureofaciens O6(GCA_000264555.1)	18	90.0		K02651			pilus assembly protein Flp/PilA
663	GCA_003851495.1_02706	Pseudomonas synxantha 2-79(GCA_003851495.1)	1	5.0					hypothetical protein
664	GCA_003851495.1_04270	Pseudomonas synxantha 2-79(GCA_003851495.1)	1	5.0	K:COG1278	K03704	Stress Response Cold shock Cold_shock,_CspA_family_of_proteins Cold shock protein CspG	GO:0005737,GO:0003677,GO:0006355,GO:0006351	Cold shock-like protein CspG	Activator
665	GCA_003851495.1_04922	Pseudomonas synxantha 2-79(GCA_003851495.1)	1	5.0					hypothetical protein
666	GCA_003850565.1_01131	CP027706_s CMR12a(GCA_003850565.1)	1	5.0					hypothetical protein
667	GCA_000264555.1_01279	Pseudomonas chlororaphis subsp. aureofaciens O6(GCA_000264555.1)	20	100.0	S:ENOG410ZR27				hypothetical protein
668	GCA_003850565.1_04947	CP027706_s CMR12a(GCA_003850565.1)	1	5.0	T:COG3712	K07165	Iron acquisition and metabolism Siderophores Siderophore_Pyoverdine Antisigma transmembrane sensor FpvR		hypothetical protein
669	GCA_000264555.1_01083	Pseudomonas chlororaphis subsp. aureofaciens O6(GCA_000264555.1)	20	100.0	S:ENOG410XVKB	K06938	Nucleosides and Nucleotides Detoxification Nudix_proteins_(nucleoside_triphosphate_hydrolases) Hypothetical nudix hydrolase YeaB		uncharacterized protein
670	GCA_003851785.1_03936	Pseudomonas chlororaphis subsp. aureofaciens Pb-St2(GCA_003851785.1)	1	5.0	S:ENOG410ZJ07				hypothetical protein
671	GCA_003851205.1_03120	Pseudomonas chlororaphis subsp. aurantiaca 449(GCA_003851205.1)	4	20.0					hypothetical protein
672	GCA_000698865.1_03428	Pseudomonas chlororaphis subsp. aureofaciens PA23(GCA_000698865.1)	1	5.0					hypothetical protein
673	GCA_003850465.1_00678	Pseudomonas chlororaphis subsp. piscium PCL1607(GCA_003850465.1)	2	10.0					hypothetical protein
674	GCA_000264555.1_02251	Pseudomonas chlororaphis subsp. aureofaciens O6(GCA_000264555.1)	20	100.0					hypothetical protein
675	GCA_000264555.1_05239	Pseudomonas chlororaphis subsp. aureofaciens O6(GCA_000264555.1)	14	70.0	K:COG3655	K07727		GO:0043565,GO:0006355,GO:0006351	Uncharacterized HTH-type transcriptional regulator YozG	DNA-binding
676	GCA_003851205.1_01867	Pseudomonas chlororaphis subsp. aurantiaca 449(GCA_003851205.1)	1	5.0	S:COG5004			GO:0019012	Baseplate protein X	Late protein
677	GCA_000264555.1_04760	Pseudomonas chlororaphis subsp. aureofaciens O6(GCA_000264555.1)	20	100.0	K:COG1278	K03704	Stress Response Cold shock Cold_shock,_CspA_family_of_proteins Cold shock protein CspA	GO:0005737,GO:0003677,GO:0006355,GO:0006351	Cold shock protein CapA	Activator
678	GCA_003851265.1_03909	Pseudomonas chlororaphis subsp. aurantiaca M71(GCA_003851265.1)	1	5.0					hypothetical protein
679	GCA_000963835.1_00593	CP010892_s PCL1606(GCA_000963835.1)	6	30.0	S:ENOG410Y7IH				hypothetical protein
680	GCA_003851785.1_01912	Pseudomonas chlororaphis subsp. aureofaciens Pb-St2(GCA_003851785.1)	1	5.0	S:COG3558	K09958			hypothetical protein
681	GCA_001921865.1_02315	MSCT_s PCL1601(GCA_001921865.1)	2	10.0					hypothetical protein
682	GCA_003851165.1_04843	Pseudomonas chlororaphis subsp. aurantiaca M12(GCA_003851165.1)	1	5.0					hypothetical protein
683	GCA_000698865.1_03008	Pseudomonas chlororaphis subsp. aureofaciens PA23(GCA_000698865.1)	3	15.0	S:ENOG410ZIKX				hypothetical protein
684	GCA_003850565.1_02388	CP027706_s CMR12a(GCA_003850565.1)	1	5.0					hypothetical protein
685	GCA_000698865.1_03420	Pseudomonas chlororaphis subsp. aureofaciens PA23(GCA_000698865.1)	1	5.0					hypothetical protein
686	GCA_003851835.1_02080	Pseudomonas chlororaphis subsp. aurantiaca DSM 19603(Type)(GCA_003851835.1)	1	5.0					hypothetical protein
687	GCA_000264555.1_03254	Pseudomonas chlororaphis subsp. aureofaciens O6(GCA_000264555.1)	12	60.0					hypothetical protein
688	GCA_003851495.1_01243	Pseudomonas synxantha 2-79(GCA_003851495.1)	1	5.0					hypothetical protein
689	GCA_003851925.1_02319	Pseudomonas chlororaphis subsp. aureofaciens ChPhzTR39(GCA_003851925.1)	1	5.0	K:ENOG410XRIM	K17737	Regulation and Cell signaling null DNA-binding_regulatory_proteins,_strays LysR family transcriptional regulator near succinyl-CoA:3-ketoacid-coenzyme A transferase	GO:0003677,GO:0003700,GO:0006351	SDS degradation transcriptional activation protein	Activator
690	GCA_000264555.1_06223	Pseudomonas chlororaphis subsp. aureofaciens O6(GCA_000264555.1)	20	100.0					hypothetical protein
691	GCA_000264555.1_02254	Pseudomonas chlororaphis subsp. aureofaciens O6(GCA_000264555.1)	20	100.0	K:COG1278	K03704	Stress Response Cold shock Cold_shock,_CspA_family_of_proteins Cold shock protein CspA	GO:0005737,GO:0003677,GO:0006355,GO:0006351	Cold shock protein CapA	Activator
692	GCA_000264555.1_01527	Pseudomonas chlororaphis subsp. aureofaciens O6(GCA_000264555.1)	8	40.0					hypothetical protein
693	GCA_003850565.1_03256	CP027706_s CMR12a(GCA_003850565.1)	1	5.0					hypothetical protein
694	GCA_000264555.1_00116	Pseudomonas chlororaphis subsp. aureofaciens O6(GCA_000264555.1)	20	100.0	S:COG5457				hypothetical protein
695	GCA_003851495.1_03025	Pseudomonas synxantha 2-79(GCA_003851495.1)	1	5.0	S:ENOG410YSSZ				hypothetical protein
696	GCA_003850365.1_01481	Pseudomonas chlororaphis subsp. piscium ATCC 17809(GCA_003850365.1)	2	10.0					hypothetical protein
697	GCA_003851495.1_05080	Pseudomonas synxantha 2-79(GCA_003851495.1)	1	5.0					hypothetical protein
698	GCA_000281915.1_03129	Pseudomonas chlororaphis subsp. chlororaphis 30-84(GCA_000281915.1)	1	5.0	S:COG0491				hypothetical protein
699	GCA_000264555.1_00695	Pseudomonas chlororaphis subsp. aureofaciens O6(GCA_000264555.1)	20	100.0	S:COG3238	K09936			bacterial/archaeal transporter family-2 protein
700	GCA_000264555.1_02097	Pseudomonas chlororaphis subsp. aureofaciens O6(GCA_000264555.1)	1	5.0					hypothetical protein
701	GCA_000264555.1_05676	Pseudomonas chlororaphis subsp. aureofaciens O6(GCA_000264555.1)	20	100.0	J:COG0828	K02970	Protein Metabolism Protein biosynthesis Ribosome_SSU_bacterial SSU ribosomal protein S21p	GO:0005840,GO:0003735,GO:0006412	30S ribosomal protein S21	Ribonucleoprotein
702	GCA_000698865.1_03401	Pseudomonas chlororaphis subsp. aureofaciens PA23(GCA_000698865.1)	1	5.0					hypothetical protein
703	GCA_000698865.1_03025	Pseudomonas chlororaphis subsp. aureofaciens PA23(GCA_000698865.1)	1	5.0					hypothetical protein
704	GCA_000264555.1_02830	Pseudomonas chlororaphis subsp. aureofaciens O6(GCA_000264555.1)	19	95.0					hypothetical protein
705	GCA_000281915.1_02601	Pseudomonas chlororaphis subsp. chlororaphis 30-84(GCA_000281915.1)	4	20.0					hypothetical protein
706	GCA_000963835.1_03497	CP010892_s PCL1606(GCA_000963835.1)	1	5.0					hypothetical protein
707	GCA_000264555.1_01516	Pseudomonas chlororaphis subsp. aureofaciens O6(GCA_000264555.1)	7	35.0					hypothetical protein
708	GCA_000281915.1_02008	Pseudomonas chlororaphis subsp. chlororaphis 30-84(GCA_000281915.1)	9	45.0	J:COG3130	K03812	Dormancy and Sporulation null Persister_Cells Ribosome modulation factor	GO:0005737,GO:0006417	Ribosome modulation factor	Cytoplasm
709	GCA_000264555.1_03375	Pseudomonas chlororaphis subsp. aureofaciens O6(GCA_000264555.1)	19	95.0	H:COG3585	K02019	Sulfur Metabolism Organic sulfur assimilation Alkanesulfonate_assimilation Organosulfonate utilization protein SsuF		molybdate transport system regulatory protein
710	GCA_003851495.1_02061	Pseudomonas synxantha 2-79(GCA_003851495.1)	1	5.0	K:COG2932				hypothetical protein
711	GCA_000264555.1_05325	Pseudomonas chlororaphis subsp. aureofaciens O6(GCA_000264555.1)	20	100.0					hypothetical protein
712	GCA_000264555.1_02102	Pseudomonas chlororaphis subsp. aureofaciens O6(GCA_000264555.1)	1	5.0					hypothetical protein
713	GCA_000264555.1_02231	Pseudomonas chlororaphis subsp. aureofaciens O6(GCA_000264555.1)	3	15.0					hypothetical protein
714	GCA_003851495.1_02864	Pseudomonas synxantha 2-79(GCA_003851495.1)	1	5.0					hypothetical protein
715	GCA_003851495.1_01506	Pseudomonas synxantha 2-79(GCA_003851495.1)	1	5.0					hypothetical protein
716	GCA_000264555.1_00044	Pseudomonas chlororaphis subsp. aureofaciens O6(GCA_000264555.1)	20	100.0	S:COG3360	K09165		GO:0000166	Dodecin	FAD
717	GCA_001921865.1_05008	MSCT_s PCL1601(GCA_001921865.1)	1	5.0					hypothetical protein
718	GCA_000698865.1_03434	Pseudomonas chlororaphis subsp. aureofaciens PA23(GCA_000698865.1)	2	10.0	S:ENOG410Z7QS			GO:0003677,GO:0006355,GO:0006351	Regulatory protein cro	DNA-binding
719	GCA_000264555.1_02893	Pseudomonas chlororaphis subsp. aureofaciens O6(GCA_000264555.1)	10	50.0					hypothetical protein
720	GCA_003851495.1_02940	Pseudomonas synxantha 2-79(GCA_003851495.1)	1	5.0					hypothetical protein
721	GCA_000698865.1_02956	Pseudomonas chlororaphis subsp. aureofaciens PA23(GCA_000698865.1)	3	15.0					hypothetical protein
722	GCA_003850365.1_05218	Pseudomonas chlororaphis subsp. piscium ATCC 17809(GCA_003850365.1)	2	10.0	S:ENOG410XWEZ				hypothetical protein
723	GCA_000264555.1_03867	Pseudomonas chlororaphis subsp. aureofaciens O6(GCA_000264555.1)	20	100.0	S:ENOG410XWVE				hypothetical protein
724	GCA_003851495.1_05031	Pseudomonas synxantha 2-79(GCA_003851495.1)	1	5.0	S:COG3251	K05375	Iron acquisition and metabolism Siderophores Siderophore_Pyoverdine Hypothetical MbtH-like protein, PA2412 homolog		Protein MbtH		Could be involved in mycobactin synthesis
725	GCA_003851925.1_04378	Pseudomonas chlororaphis subsp. aureofaciens ChPhzTR39(GCA_003851925.1)	1	5.0	T:ENOG410XPU8	K03776	Motility and Chemotaxis null Bacterial_Chemotaxis Aerotaxis sensor receptor protein	GO:0016021,GO:0005886,GO:0042802,GO:0004871,GO:0052131,GO:0007165	Aerotaxis receptor	Cell inner membrane
726	GCA_000698865.1_05468	Pseudomonas chlororaphis subsp. aureofaciens PA23(GCA_000698865.1)	2	10.0	U:ENOG410XXXX	K03221			type III secretion protein F
727	GCA_003850565.1_03694	CP027706_s CMR12a(GCA_003850565.1)	1	5.0					hypothetical protein
728	GCA_003850365.1_03981	Pseudomonas chlororaphis subsp. piscium ATCC 17809(GCA_003850365.1)	1	5.0					hypothetical protein
729	GCA_000264555.1_05927	Pseudomonas chlororaphis subsp. aureofaciens O6(GCA_000264555.1)	20	100.0	H:COG3585	K02019	Sulfur Metabolism Organic sulfur assimilation Alkanesulfonate_assimilation Organosulfonate utilization protein SsuF		molybdate transport system regulatory protein
730	GCA_003850565.1_04412	CP027706_s CMR12a(GCA_003850565.1)	2	10.0	S:ENOG411299T				hypothetical protein
731	GCA_000264555.1_03622	Pseudomonas chlororaphis subsp. aureofaciens O6(GCA_000264555.1)	18	90.0	S:ENOG41129WA				hypothetical protein
732	GCA_000963835.1_00605	CP010892_s PCL1606(GCA_000963835.1)	2	10.0					hypothetical protein
733	GCA_003850565.1_01499	CP027706_s CMR12a(GCA_003850565.1)	2	10.0					hypothetical protein
734	GCA_000281915.1_03150	Pseudomonas chlororaphis subsp. chlororaphis 30-84(GCA_000281915.1)	5	25.0					hypothetical protein
735	GCA_003851495.1_00346	Pseudomonas synxantha 2-79(GCA_003851495.1)	1	5.0					hypothetical protein
736	GCA_003850365.1_03296	Pseudomonas chlororaphis subsp. piscium ATCC 17809(GCA_003850365.1)	1	5.0					hypothetical protein
737	GCA_000264555.1_02625	Pseudomonas chlororaphis subsp. aureofaciens O6(GCA_000264555.1)	20	100.0					hypothetical protein
738	GCA_003851265.1_00032	Pseudomonas chlororaphis subsp. aurantiaca M71(GCA_003851265.1)	1	5.0	Q:COG3805	K10253			hypothetical protein		KEGG: ppu:PP_0081 DOPA 4,5-dioxygenase
739	GCA_000264555.1_02395	Pseudomonas chlororaphis subsp. aureofaciens O6(GCA_000264555.1)	17	85.0					hypothetical protein
740	GCA_003850565.1_04675	CP027706_s CMR12a(GCA_003850565.1)	2	10.0	S:COG2906	K02192			hypothetical protein
741	GCA_000264555.1_01500	Pseudomonas chlororaphis subsp. aureofaciens O6(GCA_000264555.1)	4	20.0					hypothetical protein
742	GCA_003851785.1_01921	Pseudomonas chlororaphis subsp. aureofaciens Pb-St2(GCA_003851785.1)	1	5.0	S:ENOG41123DJ	K05937			hypothetical protein
743	GCA_000281915.1_02659	Pseudomonas chlororaphis subsp. chlororaphis 30-84(GCA_000281915.1)	11	55.0					hypothetical protein
744	GCA_000698865.1_04700	Pseudomonas chlororaphis subsp. aureofaciens PA23(GCA_000698865.1)	1	5.0	S:ENOG410ZCWJ				hypothetical protein
745	GCA_003851495.1_01630	Pseudomonas synxantha 2-79(GCA_003851495.1)	1	5.0					hypothetical protein
746	GCA_003851265.1_00345	Pseudomonas chlororaphis subsp. aurantiaca M71(GCA_003851265.1)	2	10.0					hypothetical protein
747	GCA_000264555.1_05483	Pseudomonas chlororaphis subsp. aureofaciens O6(GCA_000264555.1)	1	5.0	M:COG0797	K03642	Cell Wall and Capsule null Peptidoglycan_Biosynthesis Rare lipoprotein A precursor	GO:0005886	RlpA-like lipoprotein	Cell membrane
748	GCA_003851835.1_03625	Pseudomonas chlororaphis subsp. aurantiaca DSM 19603(Type)(GCA_003851835.1)	1	5.0					hypothetical protein
749	GCA_000264555.1_00448	Pseudomonas chlororaphis subsp. aureofaciens O6(GCA_000264555.1)	20	100.0	J:COG0254	K02909	Protein Metabolism Protein biosynthesis Ribosome_LSU_bacterial LSU ribosomal protein L31p	GO:0005840,GO:0046872,GO:0019843,GO:0003735,GO:0006412	50S ribosomal protein L31	Metal-binding
750	GCA_000264555.1_02289	Pseudomonas chlororaphis subsp. aureofaciens O6(GCA_000264555.1)	1	5.0					hypothetical protein
751	GCA_003851165.1_04383	Pseudomonas chlororaphis subsp. aurantiaca M12(GCA_003851165.1)	1	5.0	S:ENOG41125EA	K01821	Metabolism of Aromatic Compounds Metabolism of central aromatic intermediates Central_meta-cleavage_pathway_of_aromatic_compound_degradation 4-oxalocrotonate tautomerase (EC 5.3.2.-)		2-hydroxymuconate tautomerase		KEGG: ppx:T1E_3218 4-oxalocrotonate tautomerase
752	GCA_001921865.1_00557	MSCT_s PCL1601(GCA_001921865.1)	1	5.0	S:ENOG4112AEM				hypothetical protein
753	GCA_000698865.1_02957	Pseudomonas chlororaphis subsp. aureofaciens PA23(GCA_000698865.1)	5	25.0					hypothetical protein
754	GCA_000963835.1_00575	CP010892_s PCL1606(GCA_000963835.1)	1	5.0					hypothetical protein
755	GCA_003850365.1_04393	Pseudomonas chlororaphis subsp. piscium ATCC 17809(GCA_003850365.1)	4	20.0					hypothetical protein
756	GCA_003851495.1_02886	Pseudomonas synxantha 2-79(GCA_003851495.1)	1	5.0	U:COG2831	K07326			hypothetical protein
757	GCA_003851495.1_00757	Pseudomonas synxantha 2-79(GCA_003851495.1)	1	5.0					hypothetical protein
758	GCA_003850565.1_06065	CP027706_s CMR12a(GCA_003850565.1)	1	5.0		K10804			hypothetical protein		KEGG: smz:SMD_0683 acyl-CoA thioesterase I
759	GCA_000281915.1_04340	Pseudomonas chlororaphis subsp. chlororaphis 30-84(GCA_000281915.1)	9	45.0		K08992			hypothetical protein
760	GCA_000264555.1_05786	Pseudomonas chlororaphis subsp. aureofaciens O6(GCA_000264555.1)	20	100.0					hypothetical protein
761	GCA_000264555.1_03982	Pseudomonas chlororaphis subsp. aureofaciens O6(GCA_000264555.1)	20	100.0	J:COG0361	K02518	Protein Metabolism Protein biosynthesis Translation_initiation_factors_bacterial Translation initiation factor 1	GO:0005737,GO:0043022,GO:0019843,GO:0003743	Translation initiation factor IF-1	Cytoplasm
762	GCA_003851495.1_02881	Pseudomonas synxantha 2-79(GCA_003851495.1)	1	5.0					hypothetical protein
763	GCA_003851905.1_03516	Pseudomonas chlororaphis subsp. aureofaciens DSM 6698(Type)(GCA_003851905.1)	1	5.0					hypothetical protein
764	GCA_000264555.1_04809	Pseudomonas chlororaphis subsp. aureofaciens O6(GCA_000264555.1)	20	100.0	S:COG2331				hypothetical protein
765	GCA_000264555.1_04376	Pseudomonas chlororaphis subsp. aureofaciens O6(GCA_000264555.1)	20	100.0	S:COG5457				hypothetical protein
766	GCA_000698865.1_05458	Pseudomonas chlororaphis subsp. aureofaciens PA23(GCA_000698865.1)	1	5.0					hypothetical protein
767	GCA_000698865.1_02999	Pseudomonas chlororaphis subsp. aureofaciens PA23(GCA_000698865.1)	1	5.0					hypothetical protein
768	GCA_000698865.1_03015	Pseudomonas chlororaphis subsp. aureofaciens PA23(GCA_000698865.1)	4	20.0					hypothetical protein
769	GCA_003851495.1_00173	Pseudomonas synxantha 2-79(GCA_003851495.1)	1	5.0	S:ENOG410Y76I				hypothetical protein
770	GCA_003850365.1_02624	Pseudomonas chlororaphis subsp. piscium ATCC 17809(GCA_003850365.1)	5	25.0					hypothetical protein
771	GCA_000264555.1_03023	Pseudomonas chlororaphis subsp. aureofaciens O6(GCA_000264555.1)	20	100.0					hypothetical protein
772	GCA_000698865.1_04938	Pseudomonas chlororaphis subsp. aureofaciens PA23(GCA_000698865.1)	1	5.0					hypothetical protein
773	GCA_003850365.1_01480	Pseudomonas chlororaphis subsp. piscium ATCC 17809(GCA_003850365.1)	2	10.0					hypothetical protein
774	GCA_000281915.1_03480	Pseudomonas chlororaphis subsp. chlororaphis 30-84(GCA_000281915.1)	4	20.0					hypothetical protein
775	GCA_003851835.1_02942	Pseudomonas chlororaphis subsp. aurantiaca DSM 19603(Type)(GCA_003851835.1)	1	5.0					hypothetical protein
776	GCA_003850565.1_06089	CP027706_s CMR12a(GCA_003850565.1)	1	5.0	L:COG3436	K07484			hypothetical protein
777	GCA_000963835.1_02158	CP010892_s PCL1606(GCA_000963835.1)	1	5.0	S:ENOG410XQTR				hypothetical protein
778	GCA_003850465.1_00228	Pseudomonas chlororaphis subsp. piscium PCL1607(GCA_003850465.1)	6	30.0					hypothetical protein
779	GCA_000963835.1_04178	CP010892_s PCL1606(GCA_000963835.1)	2	10.0					hypothetical protein
780	GCA_000264555.1_04344	Pseudomonas chlororaphis subsp. aureofaciens O6(GCA_000264555.1)	20	100.0	S:ENOG410Y42E				hypothetical protein
781	GCA_000264555.1_01273	Pseudomonas chlororaphis subsp. aureofaciens O6(GCA_000264555.1)	20	100.0					hypothetical protein
782	GCA_003850585.1_04761	Pseudomonas chlororaphis subsp. piscium ToZa7(GCA_003850585.1)	1	5.0	S:ENOG410YYTQ				hypothetical protein
783	GCA_003851495.1_03671	Pseudomonas synxantha 2-79(GCA_003851495.1)	1	5.0					hypothetical protein
784	GCA_003850465.1_03791	Pseudomonas chlororaphis subsp. piscium PCL1607(GCA_003850465.1)	1	5.0					hypothetical protein
785	GCA_000264555.1_04310	Pseudomonas chlororaphis subsp. aureofaciens O6(GCA_000264555.1)	20	100.0	S:COG3251	K05375	Iron acquisition and metabolism Siderophores Siderophore_Pyoverdine Hypothetical MbtH-like protein, PA2412 homolog		Protein MbtH		Could be involved in mycobactin synthesis
786	GCA_000963835.1_01270	CP010892_s PCL1606(GCA_000963835.1)	3	15.0	K:COG3311	K07733	Phages, Prophages, Transposable elements, Plasmids Phages, Prophages Phage_packaging_machinery Phage DNA binding protein		prophage regulatory protein
787	GCA_003851495.1_02656	Pseudomonas synxantha 2-79(GCA_003851495.1)	1	5.0	C:COG1012	K00135	Amino Acids and Derivatives Lysine, threonine, methionine, and cysteine Lysine_degradation Glutarate-semialdehyde dehydrogenase (EC 1.2.1.20)	GO:0004029,GO:0047949,GO:0004777,GO:0009013,GO:0009450,GO:0019477	Succinate-semialdehyde dehydrogenase (NAD(P)(+))	NAD
788	GCA_003850465.1_00671	Pseudomonas chlororaphis subsp. piscium PCL1607(GCA_003850465.1)	1	5.0					hypothetical protein
789	GCA_000264555.1_05087	Pseudomonas chlororaphis subsp. aureofaciens O6(GCA_000264555.1)	19	95.0					hypothetical protein
790	GCA_003851265.1_00901	Pseudomonas chlororaphis subsp. aurantiaca M71(GCA_003851265.1)	1	5.0					hypothetical protein
791	GCA_000264555.1_03293	Pseudomonas chlororaphis subsp. aureofaciens O6(GCA_000264555.1)	18	90.0					hypothetical protein
792	GCA_003851495.1_03171	Pseudomonas synxantha 2-79(GCA_003851495.1)	1	5.0					hypothetical protein
793	GCA_000698865.1_00708	Pseudomonas chlororaphis subsp. aureofaciens PA23(GCA_000698865.1)	8	40.0					hypothetical protein
794	GCA_003851495.1_00308	Pseudomonas synxantha 2-79(GCA_003851495.1)	1	5.0					hypothetical protein
795	GCA_000264555.1_04541	Pseudomonas chlororaphis subsp. aureofaciens O6(GCA_000264555.1)	20	100.0					hypothetical protein
796	GCA_003851495.1_02724	Pseudomonas synxantha 2-79(GCA_003851495.1)	1	5.0	S:COG3516	K11901	Membrane Transport Protein secretion system, Type VI Type_VI_secretion_systems Uncharacterized protein ImpB		hypothetical protein
797	GCA_000264555.1_01540	Pseudomonas chlororaphis subsp. aureofaciens O6(GCA_000264555.1)	14	70.0					hypothetical protein
798	GCA_000264555.1_06053	Pseudomonas chlororaphis subsp. aureofaciens O6(GCA_000264555.1)	1	5.0	M:COG0791	K19303	Amino Acids and Derivatives Glutamine, glutamate, aspartate, asparagine
799	GCA_000963835.1_01268	CP010892_s PCL1606(GCA_000963835.1)	1	5.0					hypothetical protein
800	GCA_000264555.1_02038	Pseudomonas chlororaphis subsp. aureofaciens O6(GCA_000264555.1)	20	100.0	C:ENOG410XUKB	K00407	Respiration Electron accepting reactions Terminal_cytochrome_C_oxidases Cytochrome c oxidase subunit CcoQ (EC 1.9.3.1)		cytochrome c oxidase cbb3-type subunit IV
801	GCA_003851495.1_02898	Pseudomonas synxantha 2-79(GCA_003851495.1)	1	5.0	H:COG0303	K03750	Cofactors, Vitamins, Prosthetic Groups, Pigments Folate and pterines Molybdenum_cofactor_biosynthesis Molybdopterin biosynthesis protein MoeA		Molybdopterin molybdotransferase		KEGG: pfs:PFLU_1755 molybdopterin molybdotransferase
802	GCA_000264555.1_03386	Pseudomonas chlororaphis subsp. aureofaciens O6(GCA_000264555.1)	20	100.0	S:ENOG410Y42E				hypothetical protein
803	GCA_003851265.1_02148	Pseudomonas chlororaphis subsp. aurantiaca M71(GCA_003851265.1)	1	5.0	L:COG3666	K07487			hypothetical protein
804	GCA_003850565.1_04183	CP027706_s CMR12a(GCA_003850565.1)	1	5.0					hypothetical protein
805	GCA_003850365.1_03452	Pseudomonas chlororaphis subsp. piscium ATCC 17809(GCA_003850365.1)	5	25.0					hypothetical protein
806	GCA_003851265.1_00354	Pseudomonas chlororaphis subsp. aurantiaca M71(GCA_003851265.1)	1	5.0					hypothetical protein
807	GCA_003851905.1_04220	Pseudomonas chlororaphis subsp. aureofaciens DSM 6698(Type)(GCA_003851905.1)	1	5.0	S:ENOG410Y00B				hypothetical protein
808	GCA_003851495.1_05301	Pseudomonas synxantha 2-79(GCA_003851495.1)	1	5.0					hypothetical protein
809	GCA_003851495.1_00475	Pseudomonas synxantha 2-79(GCA_003851495.1)	1	5.0					hypothetical protein
810	GCA_003851495.1_01041	Pseudomonas synxantha 2-79(GCA_003851495.1)	1	5.0					hypothetical protein
811	GCA_003851495.1_03766	Pseudomonas synxantha 2-79(GCA_003851495.1)	1	5.0					hypothetical protein
812	GCA_000264555.1_02959	Pseudomonas chlororaphis subsp. aureofaciens O6(GCA_000264555.1)	14	70.0	S:ENOG410Y4U5				hypothetical protein
813	GCA_000264555.1_00045	Pseudomonas chlororaphis subsp. aureofaciens O6(GCA_000264555.1)	20	100.0	S:ENOG4111V8W				hypothetical protein
814	GCA_003851495.1_00294	Pseudomonas synxantha 2-79(GCA_003851495.1)	1	5.0					hypothetical protein
815	GCA_000264555.1_02953	Pseudomonas chlororaphis subsp. aureofaciens O6(GCA_000264555.1)	19	95.0					hypothetical protein
816	GCA_001921865.1_01070	MSCT_s PCL1601(GCA_001921865.1)	1	5.0					hypothetical protein
817	GCA_000264555.1_00198	Pseudomonas chlororaphis subsp. aureofaciens O6(GCA_000264555.1)	20	100.0	S:ENOG41128YJ				hypothetical protein
818	GCA_000264555.1_02665	Pseudomonas chlororaphis subsp. aureofaciens O6(GCA_000264555.1)	19	95.0	C:ENOG41123J3	K00126	Respiration null Formate_hydrogenase NAD-dependent formate dehydrogenase delta subunit		Formate dehydrogenase		KEGG: pfe:PSF113_3170 formate dehydrogenase subunit delta
819	GCA_000264555.1_03529	Pseudomonas chlororaphis subsp. aureofaciens O6(GCA_000264555.1)	20	100.0					hypothetical protein
820	GCA_003850365.1_03757	Pseudomonas chlororaphis subsp. piscium ATCC 17809(GCA_003850365.1)	2	10.0	K:COG3311	K07733			hypothetical protein
821	GCA_000264555.1_00496	Pseudomonas chlororaphis subsp. aureofaciens O6(GCA_000264555.1)	20	100.0	S:ENOG410XXJZ				hypothetical protein
822	GCA_000264555.1_05212	Pseudomonas chlororaphis subsp. aureofaciens O6(GCA_000264555.1)	11	55.0	O:COG0526				hypothetical protein
823	GCA_001921865.1_03543	MSCT_s PCL1601(GCA_001921865.1)	1	5.0	S:ENOG410ZPES				hypothetical protein
824	GCA_000698865.1_05477	Pseudomonas chlororaphis subsp. aureofaciens PA23(GCA_000698865.1)	1	5.0	S:COG4710	K18918	Regulation and Cell signaling Programmed Cell Death and Toxin-antitoxin Systems MazEF_toxin-antitoxing_(programmed_cell_death)_system Programmed cell death antitoxin YdcD		RHH-type transcriptional regulator, rel operon repressor / antitoxin RelB
825	GCA_000264555.1_04461	Pseudomonas chlororaphis subsp. aureofaciens O6(GCA_000264555.1)	20	100.0	S:COG3089	K09898			UPF0270 protein PST_1436		Belongs to the UPF0270 family.
826	GCA_003851495.1_03982	Pseudomonas synxantha 2-79(GCA_003851495.1)	1	5.0					hypothetical protein
827	GCA_003851495.1_02085	Pseudomonas synxantha 2-79(GCA_003851495.1)	1	5.0					hypothetical protein
828	GCA_003851785.1_00176	Pseudomonas chlororaphis subsp. aureofaciens Pb-St2(GCA_003851785.1)	1	5.0	S:COG1289				hypothetical protein
829	GCA_003851495.1_02087	Pseudomonas synxantha 2-79(GCA_003851495.1)	1	5.0					hypothetical protein
830	GCA_001921865.1_05458	MSCT_s PCL1601(GCA_001921865.1)	1	5.0					hypothetical protein
831	GCA_000963835.1_04209	CP010892_s PCL1606(GCA_000963835.1)	1	5.0					hypothetical protein
832	GCA_000264555.1_02342	Pseudomonas chlororaphis subsp. aureofaciens O6(GCA_000264555.1)	20	100.0					hypothetical protein
833	GCA_003851495.1_04935	Pseudomonas synxantha 2-79(GCA_003851495.1)	1	5.0	K:COG3311	K07733	Phages, Prophages, Transposable elements, Plasmids Phages, Prophages Phage_packaging_machinery Phage DNA binding protein	GO:0003677	uncharacterized protein	DNA-binding.	To E.coli prophage CP4-57 regulatory protein alpA.
834	GCA_003851785.1_03921	Pseudomonas chlororaphis subsp. aureofaciens Pb-St2(GCA_003851785.1)	1	5.0	K:COG3284	K21405			hypothetical protein
835	GCA_000264555.1_03288	Pseudomonas chlororaphis subsp. aureofaciens O6(GCA_000264555.1)	11	55.0					hypothetical protein
836	GCA_000264555.1_00300	Pseudomonas chlororaphis subsp. aureofaciens O6(GCA_000264555.1)	9	45.0					hypothetical protein
837	GCA_003851495.1_04514	Pseudomonas synxantha 2-79(GCA_003851495.1)	1	5.0					hypothetical protein
838	GCA_000698865.1_05484	Pseudomonas chlororaphis subsp. aureofaciens PA23(GCA_000698865.1)	2	10.0					hypothetical protein
839	GCA_000264555.1_03297	Pseudomonas chlororaphis subsp. aureofaciens O6(GCA_000264555.1)	18	90.0					hypothetical protein
840	GCA_003851265.1_04301	Pseudomonas chlororaphis subsp. aurantiaca M71(GCA_003851265.1)	1	5.0	K:COG0250	K05785	RNA Metabolism Transcription Transcription_factors_bacterial Transcriptional activator RfaH		hypothetical protein
841	GCA_003851165.1_05048	Pseudomonas chlororaphis subsp. aurantiaca M12(GCA_003851165.1)	3	15.0					hypothetical protein
842	GCA_003851835.1_00411	Pseudomonas chlororaphis subsp. aurantiaca DSM 19603(Type)(GCA_003851835.1)	1	5.0	E:COG2987	K01712	Amino Acids and Derivatives Histidine Metabolism Histidine_Degradation Urocanate hydratase (EC 4.2.1.49)	GO:0005737,GO:0016153,GO:0019556,GO:0019557	Urocanate hydratase	Cytoplasm
843	GCA_003851345.1_00229	Pseudomonas chlororaphis subsp. aurantiaca Q16(GCA_003851345.1)	1	5.0	M:COG3209				hypothetical protein
844	GCA_003851165.1_04398	Pseudomonas chlororaphis subsp. aurantiaca M12(GCA_003851165.1)	1	5.0					hypothetical protein
845	GCA_003850465.1_00680	Pseudomonas chlororaphis subsp. piscium PCL1607(GCA_003850465.1)	3	15.0					hypothetical protein
846	GCA_000264555.1_00299	Pseudomonas chlororaphis subsp. aureofaciens O6(GCA_000264555.1)	8	40.0					hypothetical protein
847	GCA_000963835.1_01248	CP010892_s PCL1606(GCA_000963835.1)	4	20.0	S:COG4456	K18829	Regulation and Cell signaling Programmed Cell Death and Toxin-antitoxin Systems Toxin-antitoxin_systems_(other_than_RelBE_and_MazEF) VapB protein (antitoxin to VapC)	GO:0003677	Putative antitoxin VapB2	DNA-binding.	Antitoxin component of a toxin-antitoxin (TA) module. Neutralizes the effect of toxin VapC2 (By similarity)
848	GCA_003851495.1_04391	Pseudomonas synxantha 2-79(GCA_003851495.1)	1	5.0					hypothetical protein
849	GCA_000264555.1_02412	Pseudomonas chlororaphis subsp. aureofaciens O6(GCA_000264555.1)	11	55.0	K:COG3609	K07746	Regulation and Cell signaling Programmed Cell Death and Toxin-antitoxin Systems Toxin-antitoxin_systems_(other_than_RelBE_and_MazEF) ParD protein (antitoxin to ParE)	GO:0006355	Antitoxin ParD4		Antitoxin component of a toxin-antitoxin (TA) module. Neutralizes the effect of cognate toxin ParE4, but no other RelE or ParE toxin
850	GCA_000264555.1_04956	Pseudomonas chlororaphis subsp. aureofaciens O6(GCA_000264555.1)	20	100.0	S:COG4628	K06867		GO:0003690	DNA-binding protein VF_0530	DNA-binding.	Binds double-stranded DNA (dsDNA).
851	GCA_000264555.1_00576	Pseudomonas chlororaphis subsp. aureofaciens O6(GCA_000264555.1)	20	100.0	J:COG0238	K02963	Protein Metabolism Protein biosynthesis Ribosome_SSU_bacterial SSU ribosomal protein S18p	GO:0005840,GO:0019843,GO:0003735,GO:0006412	30S ribosomal protein S18	Ribonucleoprotein
852	GCA_000264555.1_02627	Pseudomonas chlororaphis subsp. aureofaciens O6(GCA_000264555.1)	20	100.0					hypothetical protein
853	GCA_003851495.1_04754	Pseudomonas synxantha 2-79(GCA_003851495.1)	1	5.0					hypothetical protein
854	GCA_003851165.1_03007	Pseudomonas chlororaphis subsp. aurantiaca M12(GCA_003851165.1)	1	5.0					hypothetical protein
855	GCA_003850565.1_04221	CP027706_s CMR12a(GCA_003850565.1)	1	5.0		K15648			hypothetical protein
856	GCA_003851785.1_03505	Pseudomonas chlororaphis subsp. aureofaciens Pb-St2(GCA_003851785.1)	1	5.0	K:ENOG410XRKV		Carbohydrates Monosaccharides D-gluconate_and_ketogluconates_metabolism Hypothetical transcriptional regulator YqhC	GO:0043565,GO:0003700,GO:0044212,GO:0045893,GO:0006351	Uncharacterized HTH-type transcriptional regulator YqhC	DNA-binding
857	GCA_000264555.1_02027	Pseudomonas chlororaphis subsp. aureofaciens O6(GCA_000264555.1)	20	100.0	P:COG3197		Respiration null Biogenesis_of_cbb3-type_cytochrome_c_oxidases Type cbb3 cytochrome oxidase biogenesis protein CcoS, involved in heme b insertion		hypothetical protein
858	GCA_003850585.1_04764	Pseudomonas chlororaphis subsp. piscium ToZa7(GCA_003850585.1)	1	5.0					hypothetical protein
859	GCA_003851495.1_04420	Pseudomonas synxantha 2-79(GCA_003851495.1)	1	5.0	S:ENOG41126YC	K18829		GO:0003677,GO:0009405	Virulence-associated protein VagC	DNA-binding
860	GCA_003851495.1_03324	Pseudomonas synxantha 2-79(GCA_003851495.1)	1	5.0					hypothetical protein
861	GCA_000264555.1_02119	Pseudomonas chlororaphis subsp. aureofaciens O6(GCA_000264555.1)	1	5.0					hypothetical protein
862	GCA_003851495.1_03775	Pseudomonas synxantha 2-79(GCA_003851495.1)	1	5.0					hypothetical protein
863	GCA_000281915.1_02879	Pseudomonas chlororaphis subsp. chlororaphis 30-84(GCA_000281915.1)	9	45.0					hypothetical protein
864	GCA_000264555.1_05354	Pseudomonas chlororaphis subsp. aureofaciens O6(GCA_000264555.1)	19	95.0	S:ENOG410XY80	K06950			uncharacterized protein
865	GCA_000264555.1_06004	Pseudomonas chlororaphis subsp. aureofaciens O6(GCA_000264555.1)	18	90.0	S:ENOG410XVKB	K06938	Nucleosides and Nucleotides Detoxification Nudix_proteins_(nucleoside_triphosphate_hydrolases) Hypothetical nudix hydrolase YeaB		uncharacterized protein
866	GCA_000264555.1_06128	Pseudomonas chlororaphis subsp. aureofaciens O6(GCA_000264555.1)	20	100.0	J:COG0227	K02902	Protein Metabolism Protein biosynthesis Ribosome_LSU_bacterial LSU ribosomal protein L28p	GO:0005840,GO:0003735,GO:0006412	50S ribosomal protein L28	Ribonucleoprotein
867	GCA_003851165.1_01881	Pseudomonas chlororaphis subsp. aurantiaca M12(GCA_003851165.1)	1	5.0					hypothetical protein
868	GCA_000264555.1_03811	Pseudomonas chlororaphis subsp. aureofaciens O6(GCA_000264555.1)	19	95.0	S:ENOG410ZURY				hypothetical protein
869	GCA_000281915.1_00907	Pseudomonas chlororaphis subsp. chlororaphis 30-84(GCA_000281915.1)	1	5.0					hypothetical protein
870	GCA_000264555.1_01448	Pseudomonas chlororaphis subsp. aureofaciens O6(GCA_000264555.1)	19	95.0	S:ENOG41123AU	K22550	Amino Acids and Derivatives Proline and 4-hydroxyproline Proline,_4-hydroxyproline_uptake_and_utilization Hypothetical, similar to sarcosine oxidase alpha subunit, 2Fe-2S domain		Sarcosine oxidase
871	GCA_001921865.1_00890	MSCT_s PCL1601(GCA_001921865.1)	1	5.0					hypothetical protein
872	GCA_003851495.1_04375	Pseudomonas synxantha 2-79(GCA_003851495.1)	1	5.0					hypothetical protein
873	GCA_003851495.1_01297	Pseudomonas synxantha 2-79(GCA_003851495.1)	1	5.0					hypothetical protein
874	GCA_003851835.1_03462	Pseudomonas chlororaphis subsp. aurantiaca DSM 19603(Type)(GCA_003851835.1)	2	10.0					hypothetical protein
875	GCA_000264555.1_05265	Pseudomonas chlororaphis subsp. aureofaciens O6(GCA_000264555.1)	18	90.0	S:ENOG41124WI				hypothetical protein
876	GCA_000698865.1_05432	Pseudomonas chlororaphis subsp. aureofaciens PA23(GCA_000698865.1)	1	5.0					hypothetical protein
877	GCA_000264555.1_03901	Pseudomonas chlororaphis subsp. aureofaciens O6(GCA_000264555.1)	20	100.0		K09794			uncharacterized protein
878	GCA_000264555.1_02190	Pseudomonas chlororaphis subsp. aureofaciens O6(GCA_000264555.1)	12	60.0					hypothetical protein
879	GCA_000264555.1_05166	Pseudomonas chlororaphis subsp. aureofaciens O6(GCA_000264555.1)	20	100.0					hypothetical protein
880	GCA_003851785.1_03908	Pseudomonas chlororaphis subsp. aureofaciens Pb-St2(GCA_003851785.1)	1	5.0	C:ENOG410Y8TR				hypothetical protein
881	GCA_003851925.1_03014	Pseudomonas chlororaphis subsp. aureofaciens ChPhzTR39(GCA_003851925.1)	1	5.0					hypothetical protein
882	GCA_003851925.1_03196	Pseudomonas chlororaphis subsp. aureofaciens ChPhzTR39(GCA_003851925.1)	1	5.0	T:COG0745	K18073	Regulation and Cell signaling null Orphan_regulatory_proteins Transcriptional regulatory protein RstA	GO:0005737,GO:0003677,GO:0000160,GO:0006355,GO:0006351	Transcriptional regulatory protein	Cytoplasm
883	GCA_000698865.1_03029	Pseudomonas chlororaphis subsp. aureofaciens PA23(GCA_000698865.1)	4	20.0					hypothetical protein
884	GCA_000264555.1_04944	Pseudomonas chlororaphis subsp. aureofaciens O6(GCA_000264555.1)	20	100.0	S:COG1359				hypothetical protein
885	GCA_003851785.1_01913	Pseudomonas chlororaphis subsp. aureofaciens Pb-St2(GCA_003851785.1)	1	5.0					hypothetical protein
886	GCA_003850565.1_03107	CP027706_s CMR12a(GCA_003850565.1)	1	5.0					hypothetical protein
887	GCA_001921865.1_02318	MSCT_s PCL1601(GCA_001921865.1)	3	15.0					hypothetical protein
888	GCA_000264555.1_01465	Pseudomonas chlororaphis subsp. aureofaciens O6(GCA_000264555.1)	18	90.0	S:ENOG410XYM5				hypothetical protein
889	GCA_000963835.1_02157	CP010892_s PCL1606(GCA_000963835.1)	1	5.0	S:ENOG410XQTR				hypothetical protein
890	GCA_000698865.1_05450	Pseudomonas chlororaphis subsp. aureofaciens PA23(GCA_000698865.1)	1	5.0					hypothetical protein
891	GCA_000698865.1_02929	Pseudomonas chlororaphis subsp. aureofaciens PA23(GCA_000698865.1)	1	5.0					hypothetical protein
892	GCA_003851495.1_05104	Pseudomonas synxantha 2-79(GCA_003851495.1)	1	5.0					hypothetical protein
893	GCA_000264555.1_03462	Pseudomonas chlororaphis subsp. aureofaciens O6(GCA_000264555.1)	16	80.0	S:COG0457				hypothetical protein
894	GCA_000264555.1_04348	Pseudomonas chlororaphis subsp. aureofaciens O6(GCA_000264555.1)	20	100.0	O:COG0526				hypothetical protein
895	GCA_000264555.1_01607	Pseudomonas chlororaphis subsp. aureofaciens O6(GCA_000264555.1)	20	100.0	K:ENOG410XXZS				hypothetical protein
896	GCA_000264555.1_00164	Pseudomonas chlororaphis subsp. aureofaciens O6(GCA_000264555.1)	2	10.0					hypothetical protein
897	GCA_003851495.1_04370	Pseudomonas synxantha 2-79(GCA_003851495.1)	1	5.0	S:ENOG410XZRU				hypothetical protein
898	GCA_003851835.1_02047	Pseudomonas chlororaphis subsp. aurantiaca DSM 19603(Type)(GCA_003851835.1)	1	5.0					hypothetical protein
899	GCA_003850465.1_03647	Pseudomonas chlororaphis subsp. piscium PCL1607(GCA_003850465.1)	2	10.0					hypothetical protein
900	GCA_000264555.1_02057	Pseudomonas chlororaphis subsp. aureofaciens O6(GCA_000264555.1)	20	100.0	S:COG4728	K09705			uncharacterized protein
901	GCA_001921865.1_00722	MSCT_s PCL1601(GCA_001921865.1)	1	5.0	S:COG4705				hypothetical protein
902	GCA_003851165.1_06018	Pseudomonas chlororaphis subsp. aurantiaca M12(GCA_003851165.1)	1	5.0					hypothetical protein
903	GCA_000264555.1_01356	Pseudomonas chlororaphis subsp. aureofaciens O6(GCA_000264555.1)	19	95.0	S:ENOG410Z6NH				hypothetical protein
904	GCA_000698865.1_03443	Pseudomonas chlororaphis subsp. aureofaciens PA23(GCA_000698865.1)	1	5.0					hypothetical protein
905	GCA_003851495.1_00733	Pseudomonas synxantha 2-79(GCA_003851495.1)	1	5.0					hypothetical protein
906	GCA_000264555.1_03561	Pseudomonas chlororaphis subsp. aureofaciens O6(GCA_000264555.1)	17	85.0					hypothetical protein
907	GCA_003850465.1_02235	Pseudomonas chlororaphis subsp. piscium PCL1607(GCA_003850465.1)	2	10.0					hypothetical protein
908	GCA_000264555.1_04722	Pseudomonas chlororaphis subsp. aureofaciens O6(GCA_000264555.1)	20	100.0	S:COG3530	K09954			uncharacterized protein
909	GCA_000264555.1_03963	Pseudomonas chlororaphis subsp. aureofaciens O6(GCA_000264555.1)	17	85.0					hypothetical protein
910	GCA_000963835.1_03070	CP010892_s PCL1606(GCA_000963835.1)	1	5.0	S:ENOG411296R				hypothetical protein
911	GCA_003851165.1_03592	Pseudomonas chlororaphis subsp. aurantiaca M12(GCA_003851165.1)	4	20.0					hypothetical protein
912	GCA_000281915.1_03475	Pseudomonas chlororaphis subsp. chlororaphis 30-84(GCA_000281915.1)	2	10.0					hypothetical protein
913	GCA_000264555.1_03948	Pseudomonas chlororaphis subsp. aureofaciens O6(GCA_000264555.1)	18	90.0					hypothetical protein
914	GCA_003851925.1_03272	Pseudomonas chlororaphis subsp. aureofaciens ChPhzTR39(GCA_003851925.1)	1	5.0		K15553			hypothetical protein
915	GCA_003851165.1_00336	Pseudomonas chlororaphis subsp. aurantiaca M12(GCA_003851165.1)	1	5.0					hypothetical protein
916	GCA_003850565.1_01242	CP027706_s CMR12a(GCA_003850565.1)	3	15.0	S:ENOG410XWPJ				hypothetical protein
917	GCA_000264555.1_01899	Pseudomonas chlororaphis subsp. aureofaciens O6(GCA_000264555.1)	20	100.0	I:COG0236	K02078	Fatty Acids, Lipids, and Isoprenoids Phospholipids Glycerolipid_and_Glycerophospholipid_Metabolism_in_Bacteria Acyl carrier protein	GO:0005737,GO:0000036	Acyl carrier protein 1	Cytoplasm
918	GCA_003851495.1_01511	Pseudomonas synxantha 2-79(GCA_003851495.1)	1	5.0	L:COG3077	K18918	Regulation and Cell signaling Programmed Cell Death and Toxin-antitoxin Systems Toxin-antitoxin_replicon_stabilization_systems RelB protein (antitoxin to RelE)	GO:0003677,GO:0006355,GO:0006351	Antitoxin RelB	DNA-binding
919	GCA_000963835.1_00613	CP010892_s PCL1606(GCA_000963835.1)	4	20.0	K:ENOG41126KV				hypothetical protein
920	GCA_000963835.1_00612	CP010892_s PCL1606(GCA_000963835.1)	4	20.0					hypothetical protein
921	GCA_003851265.1_04289	Pseudomonas chlororaphis subsp. aurantiaca M71(GCA_003851265.1)	1	5.0	L:COG1484		Phages, Prophages, Transposable elements, Plasmids Transposable elements CBSS-203122.12.peg.188 ISPsy4, transposition helper protein	GO:0005524	Insertion sequence IS408 putative ATP-binding protein	ATP-binding
922	GCA_000264555.1_02162	Pseudomonas chlororaphis subsp. aureofaciens O6(GCA_000264555.1)	3	15.0	S:ENOG410Z6HE				hypothetical protein
923	GCA_003851905.1_03598	Pseudomonas chlororaphis subsp. aureofaciens DSM 6698(Type)(GCA_003851905.1)	1	5.0	S:ENOG410Z28Y				hypothetical protein
924	GCA_001921865.1_00616	MSCT_s PCL1601(GCA_001921865.1)	1	5.0	O:COG0526				hypothetical protein
925	GCA_000281915.1_03147	Pseudomonas chlororaphis subsp. chlororaphis 30-84(GCA_000281915.1)	3	15.0					hypothetical protein
926	GCA_000264555.1_02868	Pseudomonas chlororaphis subsp. aureofaciens O6(GCA_000264555.1)	20	100.0					hypothetical protein
927	GCA_003851205.1_02210	Pseudomonas chlororaphis subsp. aurantiaca 449(GCA_003851205.1)	1	5.0					hypothetical protein
928	GCA_000698865.1_04743	Pseudomonas chlororaphis subsp. aureofaciens PA23(GCA_000698865.1)	3	15.0					hypothetical protein
929	GCA_003851925.1_05738	Pseudomonas chlororaphis subsp. aureofaciens ChPhzTR39(GCA_003851925.1)	1	5.0	Q:COG2132	K00368	Nitrogen Metabolism null Denitrification Copper-containing nitrite reductase (EC 1.7.2.1)	GO:0042597,GO:0005507,GO:0050421,GO:0019333,GO:0042128	Nitrite reductase (NO-forming)	Copper
930	GCA_000264555.1_05046	Pseudomonas chlororaphis subsp. aureofaciens O6(GCA_000264555.1)	17	85.0					hypothetical protein
931	GCA_003850585.1_00327	Pseudomonas chlororaphis subsp. piscium ToZa7(GCA_003850585.1)	1	5.0					hypothetical protein
932	GCA_003851495.1_04468	Pseudomonas synxantha 2-79(GCA_003851495.1)	1	5.0					hypothetical protein
933	GCA_003851495.1_01799	Pseudomonas synxantha 2-79(GCA_003851495.1)	1	5.0					hypothetical protein
934	GCA_000281915.1_02550	Pseudomonas chlororaphis subsp. chlororaphis 30-84(GCA_000281915.1)	8	40.0	S:ENOG41125G0				hypothetical protein
935	GCA_000698865.1_03012	Pseudomonas chlororaphis subsp. aureofaciens PA23(GCA_000698865.1)	4	20.0					hypothetical protein
936	GCA_003851925.1_05506	Pseudomonas chlororaphis subsp. aureofaciens ChPhzTR39(GCA_003851925.1)	1	5.0	M:ENOG410ZW1D	K20999	Cell Wall and Capsule Capsular and extracellular polysacchrides Exopolysaccharide_Biosynthesis Glycosyl transferase, group 1 family protein		hypothetical protein
937	GCA_003850365.1_00778	Pseudomonas chlororaphis subsp. piscium ATCC 17809(GCA_003850365.1)	1	5.0					hypothetical protein
938	GCA_000264555.1_00021	Pseudomonas chlororaphis subsp. aureofaciens O6(GCA_000264555.1)	19	95.0	S:ENOG410XTPJ				hypothetical protein
939	GCA_003851925.1_02213	Pseudomonas chlororaphis subsp. aureofaciens ChPhzTR39(GCA_003851925.1)	1	5.0	S:ENOG410ZZKG				hypothetical protein
940	GCA_000963835.1_02308	CP010892_s PCL1606(GCA_000963835.1)	5	25.0	S:ENOG410XV7S		Regulation and Cell signaling Programmed Cell Death and Toxin-antitoxin Systems Phd-Doc,_YdcE-YdcD_toxin-antitoxin_(programmed_cell_death)_systems Prevent host death protein, Phd antitoxin		hypothetical protein
941	GCA_003851405.1_03691	Pseudomonas chlororaphis subsp. aureofaciens 66(GCA_003851405.1)	1	5.0					hypothetical protein
942	GCA_000698865.1_01250	Pseudomonas chlororaphis subsp. aureofaciens PA23(GCA_000698865.1)	13	65.0	K:ENOG410Y2EK		Regulation and Cell signaling Programmed Cell Death and Toxin-antitoxin Systems Phd-Doc,_YdcE-YdcD_toxin-antitoxin_(programmed_cell_death)_systems Prevent host death protein, Phd antitoxin	GO:0006355	Uncharacterized protein y4kO	Plasmid.
943	GCA_003850565.1_06006	CP027706_s CMR12a(GCA_003850565.1)	1	5.0					hypothetical protein
944	GCA_003851495.1_02359	Pseudomonas synxantha 2-79(GCA_003851495.1)	1	5.0					hypothetical protein
945	GCA_000264555.1_02141	Pseudomonas chlororaphis subsp. aureofaciens O6(GCA_000264555.1)	1	5.0					hypothetical protein
946	GCA_003851495.1_00007	Pseudomonas synxantha 2-79(GCA_003851495.1)	1	5.0	I:COG0236	K02078	Fatty Acids, Lipids, and Isoprenoids Phospholipids Glycerolipid_and_Glycerophospholipid_Metabolism_in_Bacteria Acyl carrier protein		hypothetical protein
947	GCA_000264555.1_00048	Pseudomonas chlororaphis subsp. aureofaciens O6(GCA_000264555.1)	20	100.0	S:ENOG4111V8W				hypothetical protein
948	GCA_003851265.1_04036	Pseudomonas chlororaphis subsp. aurantiaca M71(GCA_003851265.1)	1	5.0					hypothetical protein
949	GCA_003850365.1_03784	Pseudomonas chlororaphis subsp. piscium ATCC 17809(GCA_003850365.1)	4	20.0	S:ENOG4111TPG				hypothetical protein
950	GCA_003851495.1_01507	Pseudomonas synxantha 2-79(GCA_003851495.1)	1	5.0					hypothetical protein
951	GCA_000264555.1_04852	Pseudomonas chlororaphis subsp. aureofaciens O6(GCA_000264555.1)	20	100.0					hypothetical protein
952	GCA_003851495.1_00241	Pseudomonas synxantha 2-79(GCA_003851495.1)	1	5.0					hypothetical protein
953	GCA_003851265.1_00897	Pseudomonas chlororaphis subsp. aurantiaca M71(GCA_003851265.1)	1	5.0					hypothetical protein
954	GCA_003850565.1_02965	CP027706_s CMR12a(GCA_003850565.1)	2	10.0					hypothetical protein
955	GCA_000264555.1_02094	Pseudomonas chlororaphis subsp. aureofaciens O6(GCA_000264555.1)	1	5.0					hypothetical protein
956	GCA_000264555.1_05536	Pseudomonas chlororaphis subsp. aureofaciens O6(GCA_000264555.1)	2	10.0					hypothetical protein
957	GCA_000698865.1_04761	Pseudomonas chlororaphis subsp. aureofaciens PA23(GCA_000698865.1)	1	5.0	P:COG3696	K07787	Virulence, Disease and Defense Resistance to antibiotics and toxic compounds Cobalt-zinc-cadmium_resistance Cation efflux system protein CusA		Cu(I)/Ag(I) efflux system membrane protein CusA/SilA
958	GCA_000264555.1_02449	Pseudomonas chlororaphis subsp. aureofaciens O6(GCA_000264555.1)	10	50.0					hypothetical protein
959	GCA_000281915.1_02708	Pseudomonas chlororaphis subsp. chlororaphis 30-84(GCA_000281915.1)	14	70.0					hypothetical protein
960	GCA_000264555.1_02133	Pseudomonas chlororaphis subsp. aureofaciens O6(GCA_000264555.1)	1	5.0					hypothetical protein
961	GCA_000963835.1_00459	CP010892_s PCL1606(GCA_000963835.1)	1	5.0	K:COG1475	K03497			chromosome partitioning protein, ParB family
962	GCA_000264555.1_01487	Pseudomonas chlororaphis subsp. aureofaciens O6(GCA_000264555.1)	20	100.0	O:COG0425	K04085	RNA Metabolism RNA processing and modification tRNA_modification_Archaea Rhodanese-like domain protein	GO:0005737,GO:0016783	Sulfurtransferase TusA homolog	Cytoplasm
963	GCA_000264555.1_04540	Pseudomonas chlororaphis subsp. aureofaciens O6(GCA_000264555.1)	19	95.0					hypothetical protein
964	GCA_000281915.1_03143	Pseudomonas chlororaphis subsp. chlororaphis 30-84(GCA_000281915.1)	6	30.0					hypothetical protein
965	GCA_000281915.1_00944	Pseudomonas chlororaphis subsp. chlororaphis 30-84(GCA_000281915.1)	1	5.0					hypothetical protein
966	GCA_003851495.1_01637	Pseudomonas synxantha 2-79(GCA_003851495.1)	1	5.0	K:COG2002				hypothetical protein
967	GCA_003851905.1_03529	Pseudomonas chlororaphis subsp. aureofaciens DSM 6698(Type)(GCA_003851905.1)	1	5.0					hypothetical protein
968	GCA_003851345.1_03067	Pseudomonas chlororaphis subsp. aurantiaca Q16(GCA_003851345.1)	2	10.0					hypothetical protein
969	GCA_000698865.1_02914	Pseudomonas chlororaphis subsp. aureofaciens PA23(GCA_000698865.1)	5	25.0					hypothetical protein
970	GCA_000264555.1_01035	Pseudomonas chlororaphis subsp. aureofaciens O6(GCA_000264555.1)	20	100.0	H:COG1977	K03636	Cofactors, Vitamins, Prosthetic Groups, Pigments Folate and pterines Molybdenum_cofactor_biosynthesis Molybdenum cofactor biosynthesis protein MoaD		molybdopterin synthase sulfur carrier subunit
971	GCA_003851905.1_04221	Pseudomonas chlororaphis subsp. aureofaciens DSM 6698(Type)(GCA_003851905.1)	1	5.0	U:COG3210	K15125	Clustering-based subsystems null CBSS-316057.3.peg.3521 Large exoproteins involved in heme utilization or adhesion		hypothetical protein
972	GCA_000264555.1_02292	Pseudomonas chlororaphis subsp. aureofaciens O6(GCA_000264555.1)	1	5.0	S:ENOG4111XEX				hypothetical protein
973	GCA_003851835.1_03585	Pseudomonas chlororaphis subsp. aurantiaca DSM 19603(Type)(GCA_003851835.1)	1	5.0					hypothetical protein
974	GCA_003851925.1_03200	Pseudomonas chlororaphis subsp. aureofaciens ChPhzTR39(GCA_003851925.1)	1	5.0	S:COG1741				hypothetical protein
975	GCA_003851495.1_03622	Pseudomonas synxantha 2-79(GCA_003851495.1)	1	5.0	S:ENOG410Z2ZD				hypothetical protein
976	GCA_003851265.1_00038	Pseudomonas chlororaphis subsp. aurantiaca M71(GCA_003851265.1)	1	5.0					hypothetical protein
977	GCA_003850565.1_05663	CP027706_s CMR12a(GCA_003850565.1)	2	10.0	S:ENOG410XVXI				hypothetical protein
978	GCA_003851835.1_03012	Pseudomonas chlororaphis subsp. aurantiaca DSM 19603(Type)(GCA_003851835.1)	1	5.0					hypothetical protein
979	GCA_000698865.1_00172	Pseudomonas chlororaphis subsp. aureofaciens PA23(GCA_000698865.1)	7	35.0					hypothetical protein
980	GCA_000264555.1_01385	Pseudomonas chlororaphis subsp. aureofaciens O6(GCA_000264555.1)	20	100.0					hypothetical protein
981	GCA_000264555.1_02241	Pseudomonas chlororaphis subsp. aureofaciens O6(GCA_000264555.1)	20	100.0					hypothetical protein
982	GCA_003850565.1_02545	CP027706_s CMR12a(GCA_003850565.1)	1	5.0	S:ENOG410YUGW				hypothetical protein
983	GCA_000264555.1_05537	Pseudomonas chlororaphis subsp. aureofaciens O6(GCA_000264555.1)	20	100.0	L:COG1722	K03602	DNA Metabolism DNA repair DNA_repair,_bacterial Exodeoxyribonuclease VII small subunit (EC 3.1.11.6)	GO:0005737,GO:0009318,GO:0008855,GO:0006308	Exodeoxyribonuclease VII	Cytoplasm
984	GCA_003851405.1_02119	Pseudomonas chlororaphis subsp. aureofaciens 66(GCA_003851405.1)	2	10.0	S:ENOG410Y65T				hypothetical protein
985	GCA_000264555.1_05082	Pseudomonas chlororaphis subsp. aureofaciens O6(GCA_000264555.1)	20	100.0					hypothetical protein
986	GCA_003851495.1_02054	Pseudomonas synxantha 2-79(GCA_003851495.1)	1	5.0					hypothetical protein
987	GCA_000698865.1_04748	Pseudomonas chlororaphis subsp. aureofaciens PA23(GCA_000698865.1)	1	5.0	S:ENOG410ZC84				hypothetical protein
988	GCA_000264555.1_04621	Pseudomonas chlororaphis subsp. aureofaciens O6(GCA_000264555.1)	18	90.0					hypothetical protein
989	GCA_000698865.1_04732	Pseudomonas chlororaphis subsp. aureofaciens PA23(GCA_000698865.1)	1	5.0					hypothetical protein
990	GCA_000264555.1_01982	Pseudomonas chlororaphis subsp. aureofaciens O6(GCA_000264555.1)	20	100.0					hypothetical protein
991	GCA_000264555.1_05142	Pseudomonas chlororaphis subsp. aureofaciens O6(GCA_000264555.1)	19	95.0					hypothetical protein
992	GCA_003851925.1_05648	Pseudomonas chlororaphis subsp. aureofaciens ChPhzTR39(GCA_003851925.1)	1	5.0	L:ENOG410XXHC	K07483			hypothetical protein
993	GCA_003851495.1_03307	Pseudomonas synxantha 2-79(GCA_003851495.1)	1	5.0					hypothetical protein
994	GCA_003850365.1_06443	Pseudomonas chlororaphis subsp. piscium ATCC 17809(GCA_003850365.1)	4	20.0	M:ENOG410XP5V	K18093	Amino Acids and Derivatives Lysine, threonine, methionine, and cysteine Lysine_degradation Outer membrane porin, OprD family		hypothetical protein		KEGG: pvr:PverR02_09975 imipenem/basic amino acid-specific outer membrane pore
995	GCA_003851495.1_02039	Pseudomonas synxantha 2-79(GCA_003851495.1)	1	5.0					hypothetical protein
996	GCA_000264555.1_05283	Pseudomonas chlororaphis subsp. aureofaciens O6(GCA_000264555.1)	1	5.0	S:COG2041	K07147		GO:0042597,GO:0046872,GO:0043546,GO:0016667,GO:0042128	Sulfoxide reductase catalytic subunit YedY	Metal-binding
997	GCA_000281915.1_05588	Pseudomonas chlororaphis subsp. chlororaphis 30-84(GCA_000281915.1)	3	15.0					hypothetical protein
998	GCA_000698865.1_04704	Pseudomonas chlororaphis subsp. aureofaciens PA23(GCA_000698865.1)	8	40.0	K:ENOG410XX7F		Cell Wall and Capsule Capsular and extracellular polysacchrides Alginate_metabolism Alginate biosynthesis transcriptional activator		hypothetical protein
999	GCA_000264555.1_01506	Pseudomonas chlororaphis subsp. aureofaciens O6(GCA_000264555.1)	5	25.0					hypothetical protein
1000	GCA_000264555.1_06198	Pseudomonas chlororaphis subsp. aureofaciens O6(GCA_000264555.1)	20	100.0	S:COG2261			GO:0016021,GO:0005886	UPF0410 protein YeaQ	Cell membrane
1001	GCA_000264555.1_00174	Pseudomonas chlororaphis subsp. aureofaciens O6(GCA_000264555.1)	17	85.0	D:COG2161	K18923	Regulation and Cell signaling Programmed Cell Death and Toxin-antitoxin Systems Toxin-antitoxin_replicon_stabilization_systems StbD replicon stabilization protein (antitoxin to StbE)		antitoxin StbD
1002	GCA_000963835.1_00574	CP010892_s PCL1606(GCA_000963835.1)	2	10.0					hypothetical protein
1003	GCA_003851265.1_00351	Pseudomonas chlororaphis subsp. aurantiaca M71(GCA_003851265.1)	1	5.0					hypothetical protein
1004	GCA_003850565.1_05298	CP027706_s CMR12a(GCA_003850565.1)	1	5.0					hypothetical protein
1005	GCA_003851785.1_02153	Pseudomonas chlororaphis subsp. aureofaciens Pb-St2(GCA_003851785.1)	1	5.0	K:COG4650	K14414	RNA Metabolism RNA processing and modification RNA_3'-terminal_phosphate_cyclase Transcriptional regulatory protein RtcR		hypothetical protein
1006	GCA_000698865.1_05530	Pseudomonas chlororaphis subsp. aureofaciens PA23(GCA_000698865.1)	2	10.0	K:ENOG410XUC3		Virulence, Disease and Defense Resistance to antibiotics and toxic compounds Cobalt-zinc-cadmium_resistance Transcriptional regulator, MerR family		hypothetical protein
1007	GCA_000264555.1_00282	Pseudomonas chlororaphis subsp. aureofaciens O6(GCA_000264555.1)	17	85.0	S:ENOG410XX1K	K21495	Cofactors, Vitamins, Prosthetic Groups, Pigments Coenzyme A Coenzyme_A_Biosynthesis Phosphopantothenoylcysteine synthetase (EC 6.3.2.5)		phosphopantothenoylcysteine decarboxylase / phosphopantothenate--cysteine ligase
1008	GCA_000281915.1_03082	Pseudomonas chlororaphis subsp. chlororaphis 30-84(GCA_000281915.1)	1	5.0					hypothetical protein
1009	GCA_000264555.1_06121	Pseudomonas chlororaphis subsp. aureofaciens O6(GCA_000264555.1)	20	100.0					hypothetical protein
1010	GCA_000264555.1_03480	Pseudomonas chlororaphis subsp. aureofaciens O6(GCA_000264555.1)	11	55.0					hypothetical protein
1011	GCA_000264555.1_03661	Pseudomonas chlororaphis subsp. aureofaciens O6(GCA_000264555.1)	15	75.0	H:COG1977	K03636	Cofactors, Vitamins, Prosthetic Groups, Pigments Folate and pterines Molybdenum_cofactor_biosynthesis Molybdenum cofactor biosynthesis protein MoaD		molybdopterin synthase sulfur carrier subunit
1012	GCA_000963835.1_02884	CP010892_s PCL1606(GCA_000963835.1)	3	15.0					hypothetical protein
1013	GCA_000264555.1_03984	Pseudomonas chlororaphis subsp. aureofaciens O6(GCA_000264555.1)	20	100.0	O:COG2127	K06891	Protein Metabolism Protein degradation Proteolysis_in_bacteria,_ATP-dependent ATP-dependent Clp protease adaptor protein ClpS	GO:0030163,GO:0006508	ATP-dependent Clp protease adapter protein ClpS		Involved in the modulation of the specificity of the ClpAP-mediated ATP-dependent protein degradation
1014	GCA_000264555.1_01216	Pseudomonas chlororaphis subsp. aureofaciens O6(GCA_000264555.1)	1	5.0					hypothetical protein
1015	GCA_000264555.1_06001	Pseudomonas chlororaphis subsp. aureofaciens O6(GCA_000264555.1)	20	100.0	S:ENOG411281A				hypothetical protein
1016	GCA_000963835.1_02397	CP010892_s PCL1606(GCA_000963835.1)	6	30.0	C:COG1146	K00395	Sulfur Metabolism Inorganic sulfur assimilation Inorganic_Sulfur_Assimilation 4Fe-4S ferredoxin, iron-sulfur binding		Adenylyl-sulfate reductase		KEGG: ipo:Ilyop_2846 adenylylsulfate reductase, subunit B
1017	GCA_000264555.1_00173	Pseudomonas chlororaphis subsp. aureofaciens O6(GCA_000264555.1)	20	100.0	S:ENOG41125G0				hypothetical protein
1018	GCA_000264555.1_03964	Pseudomonas chlororaphis subsp. aureofaciens O6(GCA_000264555.1)	19	95.0					hypothetical protein
1019	GCA_000264555.1_05103	Pseudomonas chlororaphis subsp. aureofaciens O6(GCA_000264555.1)	20	100.0	D:COG3116	K03586	Clustering-based subsystems null Bacterial_Cell_Division Cell division protein FtsL	GO:0032153,GO:0005887,GO:0043093	Cell division protein FtsL	Cell cycle
1020	GCA_003851165.1_03384	Pseudomonas chlororaphis subsp. aurantiaca M12(GCA_003851165.1)	1	5.0					hypothetical protein
1021	GCA_000264555.1_04084	Pseudomonas chlororaphis subsp. aureofaciens O6(GCA_000264555.1)	19	95.0					hypothetical protein
1022	GCA_003850565.1_00191	CP027706_s CMR12a(GCA_003850565.1)	1	5.0					hypothetical protein
1023	GCA_000264555.1_05855	Pseudomonas chlororaphis subsp. aureofaciens O6(GCA_000264555.1)	20	100.0	H:COG2104	K03154	Cofactors, Vitamins, Prosthetic Groups, Pigments null Thiamin_biosynthesis Sulfur carrier protein ThiS	GO:0009507	Uncharacterized protein ycf40	Chloroplast
1024	GCA_000698865.1_04572	Pseudomonas chlororaphis subsp. aureofaciens PA23(GCA_000698865.1)	11	55.0	I:COG0511	K02160	Fatty Acids, Lipids, and Isoprenoids Fatty acids Fatty_Acid_Biosynthesis_FASII Biotin carboxyl carrier protein of acetyl-CoA carboxylase	GO:0009317,GO:0009507,GO:0009941,GO:0009570,GO:0009536,GO:0003989,GO:0006633	Biotin carboxyl carrier protein of acetyl-CoA carboxylase 1, chloroplastic	Alternative splicing
1025	GCA_000264555.1_05021	Pseudomonas chlororaphis subsp. aureofaciens O6(GCA_000264555.1)	1	5.0	S:ENOG410XXVY				hypothetical protein
1026	GCA_000264555.1_02237	Pseudomonas chlororaphis subsp. aureofaciens O6(GCA_000264555.1)	18	90.0					hypothetical protein
1027	GCA_001921865.1_05457	MSCT_s PCL1601(GCA_001921865.1)	2	10.0					hypothetical protein
1028	GCA_000264555.1_02598	Pseudomonas chlororaphis subsp. aureofaciens O6(GCA_000264555.1)	20	100.0					hypothetical protein
1029	GCA_000963835.1_04825	CP010892_s PCL1606(GCA_000963835.1)	5	25.0					hypothetical protein
1030	GCA_000264555.1_03358	Pseudomonas chlororaphis subsp. aureofaciens O6(GCA_000264555.1)	18	90.0					hypothetical protein
1031	GCA_000963835.1_00606	CP010892_s PCL1606(GCA_000963835.1)	4	20.0					hypothetical protein
1032	GCA_003851495.1_02173	Pseudomonas synxantha 2-79(GCA_003851495.1)	1	5.0					hypothetical protein
1033	GCA_000264555.1_02762	Pseudomonas chlororaphis subsp. aureofaciens O6(GCA_000264555.1)	14	70.0	L:COG2801	K07497			putative transposase
1034	GCA_000963835.1_01267	CP010892_s PCL1606(GCA_000963835.1)	1	5.0					hypothetical protein
1035	GCA_003851495.1_04089	Pseudomonas synxantha 2-79(GCA_003851495.1)	1	5.0	S:ENOG4112B1K		Regulation and Cell signaling Programmed Cell Death and Toxin-antitoxin Systems Toxin-antitoxin_systems_(other_than_RelBE_and_MazEF) HigB toxin protein		hypothetical protein
1036	GCA_001921865.1_03047	MSCT_s PCL1601(GCA_001921865.1)	1	5.0					hypothetical protein
1037	GCA_003851905.1_03495	Pseudomonas chlororaphis subsp. aureofaciens DSM 6698(Type)(GCA_003851905.1)	1	5.0					hypothetical protein
1038	GCA_003851785.1_00294	Pseudomonas chlororaphis subsp. aureofaciens Pb-St2(GCA_003851785.1)	1	5.0					hypothetical protein
1039	GCA_003850565.1_03084	CP027706_s CMR12a(GCA_003850565.1)	1	5.0					hypothetical protein
1040	GCA_003851495.1_02534	Pseudomonas synxantha 2-79(GCA_003851495.1)	1	5.0					hypothetical protein
1041	GCA_003850445.1_04600	Pseudomonas chlororaphis subsp. piscium PCL1391(GCA_003850445.1)	2	10.0					hypothetical protein
1042	GCA_003851495.1_02038	Pseudomonas synxantha 2-79(GCA_003851495.1)	1	5.0					hypothetical protein
1043	GCA_000264555.1_01214	Pseudomonas chlororaphis subsp. aureofaciens O6(GCA_000264555.1)	1	5.0					hypothetical protein
1044	GCA_003851495.1_05474	Pseudomonas synxantha 2-79(GCA_003851495.1)	1	5.0					hypothetical protein
1045	GCA_000264555.1_00301	Pseudomonas chlororaphis subsp. aureofaciens O6(GCA_000264555.1)	18	90.0	S:ENOG410Y7H2			GO:0015643,GO:0030153	Colicin-E9 immunity protein	Bacteriocin immunity
1046	GCA_000963835.1_00609	CP010892_s PCL1606(GCA_000963835.1)	4	20.0					hypothetical protein
1047	GCA_000264555.1_02677	Pseudomonas chlororaphis subsp. aureofaciens O6(GCA_000264555.1)	14	70.0					hypothetical protein
1048	GCA_003851205.1_03058	Pseudomonas chlororaphis subsp. aurantiaca 449(GCA_003851205.1)	1	5.0					hypothetical protein
1049	GCA_000264555.1_02597	Pseudomonas chlororaphis subsp. aureofaciens O6(GCA_000264555.1)	20	100.0	S:ENOG410XUD4				UPF0337 protein PP_2059		Belongs to the UPF0337 (CsbD) family.
1050	GCA_000264555.1_01090	Pseudomonas chlororaphis subsp. aureofaciens O6(GCA_000264555.1)	20	100.0	J:COG0228	K02959	Protein Metabolism Protein biosynthesis Ribosome_SSU_bacterial SSU ribosomal protein S16p	GO:0022627,GO:0003735,GO:0006412	30S ribosomal protein S16	Ribonucleoprotein
1051	GCA_000264555.1_03930	Pseudomonas chlororaphis subsp. aureofaciens O6(GCA_000264555.1)	18	90.0	H:COG1977	K03636	Cofactors, Vitamins, Prosthetic Groups, Pigments Folate and pterines Molybdenum_cofactor_biosynthesis Molybdenum cofactor biosynthesis protein MoaD	GO:0005829,GO:0000166,GO:0006777	Molybdopterin synthase sulfur carrier subunit	Isopeptide bond
1052	GCA_000264555.1_04247	Pseudomonas chlororaphis subsp. aureofaciens O6(GCA_000264555.1)	13	65.0	I:COG0236	K02078	Fatty Acids, Lipids, and Isoprenoids Phospholipids Glycerolipid_and_Glycerophospholipid_Metabolism_in_Bacteria Acyl carrier protein	GO:0005737,GO:0000036	Acyl carrier protein 1	Cytoplasm
1053	GCA_000264555.1_05873	Pseudomonas chlororaphis subsp. aureofaciens O6(GCA_000264555.1)	20	100.0	C:COG1145	K05337	Sulfur Metabolism Inorganic sulfur assimilation Inorganic_Sulfur_Assimilation 4Fe-4S ferredoxin, iron-sulfur binding	GO:0051539,GO:0046872,GO:0055114	Ferredoxin	4Fe-4S
1054	GCA_003851205.1_01843	Pseudomonas chlororaphis subsp. aurantiaca 449(GCA_003851205.1)	1	5.0	S:ENOG41122M2				hypothetical protein
1055	GCA_000264555.1_01645	Pseudomonas chlororaphis subsp. aureofaciens O6(GCA_000264555.1)	19	95.0		K02078			acyl carrier protein
1056	GCA_000264555.1_01821	Pseudomonas chlororaphis subsp. aureofaciens O6(GCA_000264555.1)	20	100.0					hypothetical protein
1057	GCA_000264555.1_02532	Pseudomonas chlororaphis subsp. aureofaciens O6(GCA_000264555.1)	4	20.0	S:ENOG410YSSN			GO:0015643,GO:0030153	Colicin-E7 immunity protein	Bacteriocin immunity
1058	GCA_003851905.1_03490	Pseudomonas chlororaphis subsp. aureofaciens DSM 6698(Type)(GCA_003851905.1)	1	5.0	S:ENOG410Z1VX				hypothetical protein
1059	GCA_003851835.1_03611	Pseudomonas chlororaphis subsp. aurantiaca DSM 19603(Type)(GCA_003851835.1)	1	5.0					hypothetical protein
1060	GCA_003851495.1_03243	Pseudomonas synxantha 2-79(GCA_003851495.1)	1	5.0					hypothetical protein
1061	GCA_003851495.1_04942	Pseudomonas synxantha 2-79(GCA_003851495.1)	1	5.0					hypothetical protein
1062	GCA_000264555.1_04120	Pseudomonas chlororaphis subsp. aureofaciens O6(GCA_000264555.1)	15	75.0	S:ENOG410Y68J				hypothetical protein
1063	GCA_000264555.1_02820	Pseudomonas chlororaphis subsp. aureofaciens O6(GCA_000264555.1)	16	80.0					hypothetical protein
1064	GCA_001921865.1_02531	MSCT_s PCL1601(GCA_001921865.1)	1	5.0	E:COG4359		Amino Acids and Derivatives Lysine, threonine, methionine, and cysteine Methionine_Salvage 2-hydroxy-3-keto-5-methylthiopentenyl-1-phosphate phosphatase		hypothetical protein
1065	GCA_003851495.1_02953	Pseudomonas synxantha 2-79(GCA_003851495.1)	1	5.0					hypothetical protein
1066	GCA_003850565.1_03043	CP027706_s CMR12a(GCA_003850565.1)	1	5.0	I:COG0236	K15337	Fatty Acids, Lipids, and Isoprenoids Phospholipids Glycerolipid_and_Glycerophospholipid_Metabolism_in_Bacteria Acyl carrier protein	GO:0005737,GO:0017000	Polyketide biosynthesis acyl-carrier-protein AcpK	Antibiotic biosynthesis
1067	GCA_003851925.1_05635	Pseudomonas chlororaphis subsp. aureofaciens ChPhzTR39(GCA_003851925.1)	1	5.0	O:COG4930	K01338	Protein Metabolism Protein degradation Proteolysis_in_bacteria,_ATP-dependent ATP-dependent protease La (EC 3.4.21.53)		Endopeptidase La		KEGG: eoi:ECO111_5154 ATP-dependent Lon protease
1068	GCA_003851165.1_02493	Pseudomonas chlororaphis subsp. aurantiaca M12(GCA_003851165.1)	4	20.0					hypothetical protein
1069	GCA_000963835.1_00592	CP010892_s PCL1606(GCA_000963835.1)	4	20.0					hypothetical protein
1070	GCA_003851165.1_04717	Pseudomonas chlororaphis subsp. aurantiaca M12(GCA_003851165.1)	5	25.0					hypothetical protein
1071	GCA_003850445.1_03962	Pseudomonas chlororaphis subsp. piscium PCL1391(GCA_003850445.1)	7	35.0	S:ENOG41129PJ			GO:0015643,GO:0030153	Colicin-E7 immunity protein	Bacteriocin immunity
1072	GCA_000698865.1_03439	Pseudomonas chlororaphis subsp. aureofaciens PA23(GCA_000698865.1)	1	5.0					hypothetical protein
1073	GCA_000264555.1_02032	Pseudomonas chlororaphis subsp. aureofaciens O6(GCA_000264555.1)	17	85.0	S:ENOG41122I4				uncharacterized protein
1074	GCA_000264555.1_00484	Pseudomonas chlororaphis subsp. aureofaciens O6(GCA_000264555.1)	20	100.0	I:COG0236	K02078	Fatty Acids, Lipids, and Isoprenoids Fatty acids Phospholipid_and_Fatty_acid_biosynthesis_related_cluster Acyl carrier protein (ACP2)	GO:0005737,GO:0000036	Acyl carrier protein	Cytoplasm
1075	GCA_000264555.1_02046	Pseudomonas chlororaphis subsp. aureofaciens O6(GCA_000264555.1)	20	100.0	O:COG0425	K04085	RNA Metabolism RNA processing and modification tRNA_modification_Bacteria tRNA 5-methylaminomethyl-2-thiouridine synthase TusA	GO:0005737,GO:0016783,GO:0008033	Sulfurtransferase TusA homolog	Cytoplasm
1076	GCA_000264555.1_00934	Pseudomonas chlororaphis subsp. aureofaciens O6(GCA_000264555.1)	20	100.0	K:COG5007	K07390	Miscellaneous null Broadly_distributed_proteins_not_in_subsystems YrbA protein		Uncharacterized protein HI_1082		Belongs to the BolA/IbaG family.
1077	GCA_001921865.1_03489	MSCT_s PCL1601(GCA_001921865.1)	3	15.0	S:ENOG410XYPQ				hypothetical protein
1078	GCA_003851165.1_02951	Pseudomonas chlororaphis subsp. aurantiaca M12(GCA_003851165.1)	4	20.0		K06147			hypothetical protein
1079	GCA_003851495.1_05407	Pseudomonas synxantha 2-79(GCA_003851495.1)	1	5.0					hypothetical protein
1080	GCA_000264555.1_04503	Pseudomonas chlororaphis subsp. aureofaciens O6(GCA_000264555.1)	20	100.0	D:COG0851	K03608	Clustering-based subsystems null Bacterial_Cell_Division Cell division topological specificity factor MinE	GO:0007049,GO:0051301,GO:0032955	Cell division topological specificity factor	Cell cycle
1081	GCA_000264555.1_00403	Pseudomonas chlororaphis subsp. aureofaciens O6(GCA_000264555.1)	20	100.0	S:ENOG4112BTI				hypothetical protein
1082	GCA_003851495.1_01512	Pseudomonas synxantha 2-79(GCA_003851495.1)	1	5.0					hypothetical protein
1083	GCA_000698865.1_02924	Pseudomonas chlororaphis subsp. aureofaciens PA23(GCA_000698865.1)	4	20.0	S:ENOG410Y717			GO:0009279,GO:0019867	Major outer membrane lipoprotein	Cell outer membrane
1084	GCA_000264555.1_05752	Pseudomonas chlororaphis subsp. aureofaciens O6(GCA_000264555.1)	18	90.0	DJ:COG2026	K06218			mRNA interferase RelE/StbE
1085	GCA_000264555.1_01504	Pseudomonas chlororaphis subsp. aureofaciens O6(GCA_000264555.1)	4	20.0					hypothetical protein
1086	GCA_000264555.1_03004	Pseudomonas chlororaphis subsp. aureofaciens O6(GCA_000264555.1)	20	100.0					hypothetical protein
1087	GCA_003850565.1_00960	CP027706_s CMR12a(GCA_003850565.1)	1	5.0					hypothetical protein
1088	GCA_000264555.1_02140	Pseudomonas chlororaphis subsp. aureofaciens O6(GCA_000264555.1)	2	10.0					hypothetical protein
1089	GCA_000264555.1_01499	Pseudomonas chlororaphis subsp. aureofaciens O6(GCA_000264555.1)	4	20.0					hypothetical protein
1090	GCA_000264555.1_01938	Pseudomonas chlororaphis subsp. aureofaciens O6(GCA_000264555.1)	20	100.0	S:COG0727	K06940			UPF0153 protein VC_1057		Belongs to the UPF0153 family.
1091	GCA_003851495.1_03970	Pseudomonas synxantha 2-79(GCA_003851495.1)	1	5.0					hypothetical protein
1092	GCA_003850365.1_03667	Pseudomonas chlororaphis subsp. piscium ATCC 17809(GCA_003850365.1)	2	10.0					hypothetical protein
1093	GCA_003850365.1_02381	Pseudomonas chlororaphis subsp. piscium ATCC 17809(GCA_003850365.1)	4	20.0	S:ENOG410Y7H2			GO:0015643,GO:0030153	Colicin-E8 immunity protein	Bacteriocin immunity
1094	GCA_000264555.1_02096	Pseudomonas chlororaphis subsp. aureofaciens O6(GCA_000264555.1)	1	5.0					hypothetical protein
1095	GCA_000264555.1_01809	Pseudomonas chlororaphis subsp. aureofaciens O6(GCA_000264555.1)	20	100.0	C:COG2009	K00241	Respiration Electron donating reactions Succinate_dehydrogenase Succinate dehydrogenase cytochrome b-556 subunit	GO:0016021,GO:0005886,GO:0045281,GO:0009055,GO:0046872,GO:0000104,GO:0006099	Succinate dehydrogenase cytochrome b556 subunit	Cell inner membrane
1096	GCA_003850365.1_03795	Pseudomonas chlororaphis subsp. piscium ATCC 17809(GCA_003850365.1)	2	10.0	K:ENOG410XUC3		Virulence, Disease and Defense Resistance to antibiotics and toxic compounds Cobalt-zinc-cadmium_resistance Transcriptional regulator, MerR family		hypothetical protein
1097	GCA_003851495.1_01961	Pseudomonas synxantha 2-79(GCA_003851495.1)	1	5.0					hypothetical protein
1098	GCA_000264555.1_00374	Pseudomonas chlororaphis subsp. aureofaciens O6(GCA_000264555.1)	20	100.0	O:COG0695	K03676	Stress Response Oxidative stress Glutathione:_Redox_cycle Glutaredoxin 3 (Grx3)	GO:0005737,GO:0009055,GO:0015035,GO:0045454	Glutaredoxin	Cytoplasm
1099	GCA_000281915.1_04050	Pseudomonas chlororaphis subsp. chlororaphis 30-84(GCA_000281915.1)	1	5.0	Q:COG0500				hypothetical protein
1100	GCA_003850365.1_03693	Pseudomonas chlororaphis subsp. piscium ATCC 17809(GCA_003850365.1)	1	5.0	I:COG0236	K02078	Fatty Acids, Lipids, and Isoprenoids Phospholipids Glycerolipid_and_Glycerophospholipid_Metabolism_in_Bacteria Acyl carrier protein	GO:0005737,GO:0000036	Acyl carrier protein	Cytoplasm
1101	GCA_000264555.1_01479	Pseudomonas chlororaphis subsp. aureofaciens O6(GCA_000264555.1)	20	100.0	S:COG2938	K09159	Carbohydrates Central carbohydrate metabolism TCA_Cycle Succinate dehydrogenase iron-sulfur protein (EC 1.3.99.1)		Uncharacterized protein PFL_1445		Belongs to the CptB antitoxin family.
1102	GCA_003850565.1_05578	CP027706_s CMR12a(GCA_003850565.1)	1	5.0					hypothetical protein
1103	GCA_000698865.1_03659	Pseudomonas chlororaphis subsp. aureofaciens PA23(GCA_000698865.1)	11	55.0					hypothetical protein
1104	GCA_000264555.1_01262	Pseudomonas chlororaphis subsp. aureofaciens O6(GCA_000264555.1)	2	10.0					hypothetical protein
1105	GCA_000281915.1_00338	Pseudomonas chlororaphis subsp. chlororaphis 30-84(GCA_000281915.1)	16	80.0					hypothetical protein
1106	GCA_003850365.1_03768	Pseudomonas chlororaphis subsp. piscium ATCC 17809(GCA_003850365.1)	1	5.0					hypothetical protein
1107	GCA_003851495.1_02419	Pseudomonas synxantha 2-79(GCA_003851495.1)	1	5.0					hypothetical protein
1108	GCA_000963835.1_05767	CP010892_s PCL1606(GCA_000963835.1)	1	5.0					hypothetical protein
1109	GCA_003851205.1_01831	Pseudomonas chlororaphis subsp. aurantiaca 449(GCA_003851205.1)	1	5.0					hypothetical protein
1110	GCA_000264555.1_01940	Pseudomonas chlororaphis subsp. aureofaciens O6(GCA_000264555.1)	20	100.0					hypothetical protein
1111	GCA_003850365.1_03688	Pseudomonas chlororaphis subsp. piscium ATCC 17809(GCA_003850365.1)	1	5.0	U:ENOG411262J	K03221	Clustering-based subsystems Type III secretion system, extended Type_III_secretion_systems,_extended MxiH protein	GO:0008565,GO:0009405	Protein PrgI	Protein transport
1112	GCA_000698865.1_01437	Pseudomonas chlororaphis subsp. aureofaciens PA23(GCA_000698865.1)	1	5.0					hypothetical protein
1113	GCA_000264555.1_03985	Pseudomonas chlororaphis subsp. aureofaciens O6(GCA_000264555.1)	20	100.0	K:COG1278	K03704	Stress Response Cold shock Cold_shock,_CspA_family_of_proteins Cold shock protein CspG	GO:0005737,GO:0003677,GO:0006355,GO:0006351	Cold shock protein CapA	Activator
1114	GCA_000281915.1_03803	Pseudomonas chlororaphis subsp. chlororaphis 30-84(GCA_000281915.1)	4	20.0	S:ENOG4111TYE				hypothetical protein
1115	GCA_000264555.1_00692	Pseudomonas chlororaphis subsp. aureofaciens O6(GCA_000264555.1)	16	80.0	S:ENOG410XQ1V				hypothetical protein
1116	GCA_000264555.1_05374	Pseudomonas chlororaphis subsp. aureofaciens O6(GCA_000264555.1)	20	100.0	J:COG0211	K02899	Protein Metabolism Protein biosynthesis Ribosome_LSU_bacterial LSU ribosomal protein L27p	GO:0005840,GO:0003735,GO:0006412	50S ribosomal protein L27	Ribonucleoprotein
1117	GCA_000264555.1_06302	Pseudomonas chlororaphis subsp. aureofaciens O6(GCA_000264555.1)	20	100.0	C:COG0636	K02110	Respiration ATP synthases F0F1-type_ATP_synthase ATP synthase C chain (EC 3.6.3.14)	GO:0016021,GO:0045264,GO:0008289,GO:0046933,GO:0015991,GO:0015986	ATP synthase subunit c	ATP synthesis
1118	GCA_000698865.1_05481	Pseudomonas chlororaphis subsp. aureofaciens PA23(GCA_000698865.1)	2	10.0		K18984			secretion system chaperone SsaE
1119	GCA_003850365.1_03794	Pseudomonas chlororaphis subsp. piscium ATCC 17809(GCA_003850365.1)	1	5.0					hypothetical protein
1120	GCA_000264555.1_01543	Pseudomonas chlororaphis subsp. aureofaciens O6(GCA_000264555.1)	5	25.0					hypothetical protein
1121	GCA_000264555.1_01508	Pseudomonas chlororaphis subsp. aureofaciens O6(GCA_000264555.1)	8	40.0	K:COG1974		DNA Metabolism DNA repair DNA_repair,_bacterial SOS-response repressor and protease LexA (EC 3.4.21.88)	GO:0003677,GO:0006355,GO:0006351	Putative lambdoid prophage e14 repressor protein C2	DNA-binding
1122	GCA_000264555.1_00272	Pseudomonas chlororaphis subsp. aureofaciens O6(GCA_000264555.1)	19	95.0					hypothetical protein
1123	GCA_000264555.1_02887	Pseudomonas chlororaphis subsp. aureofaciens O6(GCA_000264555.1)	18	90.0					hypothetical protein
1124	GCA_000264555.1_05761	Pseudomonas chlororaphis subsp. aureofaciens O6(GCA_000264555.1)	20	100.0	S:ENOG410ZGJJ				hypothetical protein
1125	GCA_003850365.1_03771	Pseudomonas chlororaphis subsp. piscium ATCC 17809(GCA_003850365.1)	2	10.0					hypothetical protein
1126	GCA_003850565.1_01201	CP027706_s CMR12a(GCA_003850565.1)	2	10.0	S:ENOG410Y30P				hypothetical protein
1127	GCA_003851495.1_02178	Pseudomonas synxantha 2-79(GCA_003851495.1)	1	5.0					hypothetical protein
1128	GCA_003851905.1_04165	Pseudomonas chlororaphis subsp. aureofaciens DSM 6698(Type)(GCA_003851905.1)	1	5.0	S:ENOG4111V1M				hypothetical protein
1129	GCA_003851165.1_00338	Pseudomonas chlororaphis subsp. aurantiaca M12(GCA_003851165.1)	1	5.0					hypothetical protein
1130	GCA_003851495.1_02065	Pseudomonas synxantha 2-79(GCA_003851495.1)	1	5.0	S:COG4104				hypothetical protein
1131	GCA_003851495.1_03667	Pseudomonas synxantha 2-79(GCA_003851495.1)	1	5.0					hypothetical protein
1132	GCA_000698865.1_03403	Pseudomonas chlororaphis subsp. aureofaciens PA23(GCA_000698865.1)	2	10.0	S:ENOG4112CH4				hypothetical protein
1133	GCA_003851205.1_04081	Pseudomonas chlororaphis subsp. aurantiaca 449(GCA_003851205.1)	3	15.0	E:COG0411	K01995	Membrane Transport ABC transporters ABC_transporter_branched-chain_amino_acid_(TC_3.A.1.4.1) Branched-chain amino acid transport ATP-binding protein LivG (TC 3.A.1.4.1)		hypothetical protein
1134	GCA_000963835.1_03744	CP010892_s PCL1606(GCA_000963835.1)	1	5.0	S:ENOG410Y0GM	K21904	Stress Response Oxidative stress Oxidative_stress Metallothionein		hypothetical protein
1135	GCA_000264555.1_03083	Pseudomonas chlororaphis subsp. aureofaciens O6(GCA_000264555.1)	18	90.0					hypothetical protein
1136	GCA_001921865.1_04790	MSCT_s PCL1601(GCA_001921865.1)	1	5.0					hypothetical protein
1137	GCA_003851495.1_04211	Pseudomonas synxantha 2-79(GCA_003851495.1)	1	5.0					hypothetical protein
1138	GCA_003851925.1_02053	Pseudomonas chlororaphis subsp. aureofaciens ChPhzTR39(GCA_003851925.1)	1	5.0	S:ENOG41121GI				hypothetical protein
1139	GCA_000264555.1_05160	Pseudomonas chlororaphis subsp. aureofaciens O6(GCA_000264555.1)	20	100.0	S:ENOG410XY4I				hypothetical protein
1140	GCA_003850585.1_00363	Pseudomonas chlororaphis subsp. piscium ToZa7(GCA_003850585.1)	1	5.0					hypothetical protein
1141	GCA_003851905.1_03476	Pseudomonas chlororaphis subsp. aureofaciens DSM 6698(Type)(GCA_003851905.1)	1	5.0					Protein L	Plasmid.
1142	GCA_003850565.1_00682	CP027706_s CMR12a(GCA_003850565.1)	1	5.0	I:COG0183	K00626	Fatty Acids, Lipids, and Isoprenoids Isoprenoids Isoprenoid_Biosynthesis Acetyl-CoA acetyltransferase (EC 2.3.1.9)	GO:0005737,GO:0003988,GO:0006635	Acetyl-CoA C-acetyltransferase	Acyltransferase
1143	GCA_003851495.1_00157	Pseudomonas synxantha 2-79(GCA_003851495.1)	1	5.0					hypothetical protein
1144	GCA_003851925.1_01457	Pseudomonas chlororaphis subsp. aureofaciens ChPhzTR39(GCA_003851925.1)	1	5.0	S:ENOG411243Y				uncharacterized protein	Plasmid.
1145	GCA_000264555.1_03656	Pseudomonas chlororaphis subsp. aureofaciens O6(GCA_000264555.1)	12	60.0	S:ENOG410ZEIG			GO:0016021,GO:0005886	Uncharacterized 8.5 kDa protein in nirQ 3'region	Cell membrane
1146	GCA_003850565.1_03089	CP027706_s CMR12a(GCA_003850565.1)	1	5.0	K:ENOG410XUC3		DNA Metabolism DNA repair DNA_repair,_bacterial SOS-response repressor and protease LexA (EC 3.4.21.88)	GO:0043565,GO:0006355,GO:0006351	Uncharacterized HTH-type transcriptional regulator	DNA-binding
1147	GCA_003851345.1_03537	Pseudomonas chlororaphis subsp. aurantiaca Q16(GCA_003851345.1)	1	5.0					hypothetical protein
1148	GCA_003850565.1_01597	CP027706_s CMR12a(GCA_003850565.1)	1	5.0					hypothetical protein
1149	GCA_000264555.1_00875	Pseudomonas chlororaphis subsp. aureofaciens O6(GCA_000264555.1)	19	95.0					hypothetical protein
1150	GCA_000264555.1_04180	Pseudomonas chlororaphis subsp. aureofaciens O6(GCA_000264555.1)	15	75.0	S:COG4104				hypothetical protein
1151	GCA_000264555.1_00485	Pseudomonas chlororaphis subsp. aureofaciens O6(GCA_000264555.1)	20	100.0	I:COG0236	K02078	Fatty Acids, Lipids, and Isoprenoids Fatty acids Phospholipid_and_Fatty_acid_biosynthesis_related_cluster Acyl carrier protein (ACP1)		acyl carrier protein
1152	GCA_000963835.1_00604	CP010892_s PCL1606(GCA_000963835.1)	6	30.0	K:ENOG4111Y02				hypothetical protein
1153	GCA_003851165.1_00341	Pseudomonas chlororaphis subsp. aurantiaca M12(GCA_003851165.1)	1	5.0					hypothetical protein
1154	GCA_000264555.1_00562	Pseudomonas chlororaphis subsp. aureofaciens O6(GCA_000264555.1)	20	100.0	T:COG1923	K03666	Stress Response null Hfl_operon RNA-binding protein Hfq	GO:0003723,GO:0006355	RNA-binding protein Hfq	RNA-binding
1155	GCA_000264555.1_02876	Pseudomonas chlororaphis subsp. aureofaciens O6(GCA_000264555.1)	20	100.0	S:COG3139	K09916	Carbohydrates null Unknown_carbohydrate_utilization_(_cluster_Ydj_) Uncharacterized protein YeaC		Uncharacterized protein YeaC
1156	GCA_003851495.1_03706	Pseudomonas synxantha 2-79(GCA_003851495.1)	1	5.0					hypothetical protein
1157	GCA_000264555.1_00651	Pseudomonas chlororaphis subsp. aureofaciens O6(GCA_000264555.1)	19	95.0					hypothetical protein
1158	GCA_000264555.1_06015	Pseudomonas chlororaphis subsp. aureofaciens O6(GCA_000264555.1)	20	100.0	S:COG2960	K09806			uncharacterized protein
1159	GCA_003850565.1_02457	CP027706_s CMR12a(GCA_003850565.1)	2	10.0	S:ENOG411243Y				uncharacterized protein	Plasmid.
1160	GCA_000264555.1_02819	Pseudomonas chlororaphis subsp. aureofaciens O6(GCA_000264555.1)	19	95.0					hypothetical protein
1161	GCA_003850365.1_03793	Pseudomonas chlororaphis subsp. piscium ATCC 17809(GCA_003850365.1)	1	5.0	S:ENOG410Y038				hypothetical protein
1162	GCA_003850365.1_02630	Pseudomonas chlororaphis subsp. piscium ATCC 17809(GCA_003850365.1)	5	25.0	K:COG2932				hypothetical protein
1163	GCA_003851495.1_04373	Pseudomonas synxantha 2-79(GCA_003851495.1)	1	5.0					hypothetical protein
1164	GCA_003850565.1_02654	CP027706_s CMR12a(GCA_003850565.1)	1	5.0					hypothetical protein
1165	GCA_000264555.1_02933	Pseudomonas chlororaphis subsp. aureofaciens O6(GCA_000264555.1)	18	90.0					hypothetical protein
1166	GCA_000264555.1_02082	Pseudomonas chlororaphis subsp. aureofaciens O6(GCA_000264555.1)	20	100.0	S:ENOG410Y4MX				hypothetical protein
1167	GCA_003850565.1_02968	CP027706_s CMR12a(GCA_003850565.1)	1	5.0	P:COG0841				hypothetical protein
1168	GCA_000281915.1_02404	Pseudomonas chlororaphis subsp. chlororaphis 30-84(GCA_000281915.1)	1	5.0	K:ENOG410XNQA				hypothetical protein
1169	GCA_000264555.1_00365	Pseudomonas chlororaphis subsp. aureofaciens O6(GCA_000264555.1)	20	100.0	S:ENOG410Y4W5				hypothetical protein
1170	GCA_000698865.1_05466	Pseudomonas chlororaphis subsp. aureofaciens PA23(GCA_000698865.1)	2	10.0	S:ENOG4112AZJ	K15344			secreted effector protein SseB
1171	GCA_000281915.1_01003	Pseudomonas chlororaphis subsp. chlororaphis 30-84(GCA_000281915.1)	5	25.0	K:ENOG4111TYF				hypothetical protein
1172	GCA_000264555.1_04340	Pseudomonas chlororaphis subsp. aureofaciens O6(GCA_000264555.1)	18	90.0					hypothetical protein
1173	GCA_003851205.1_01834	Pseudomonas chlororaphis subsp. aurantiaca 449(GCA_003851205.1)	1	5.0					hypothetical protein
1174	GCA_001921865.1_02537	MSCT_s PCL1601(GCA_001921865.1)	1	5.0	T:COG2204	K02481	Virulence, Disease and Defense Resistance to antibiotics and toxic compounds Zinc_resistance Response regulator of zinc sigma-54-dependent two-component system		hypothetical protein
1175	GCA_000963835.1_00480	CP010892_s PCL1606(GCA_000963835.1)	1	5.0	S:ENOG4111V82				hypothetical protein
1176	GCA_000698865.1_01954	Pseudomonas chlororaphis subsp. aureofaciens PA23(GCA_000698865.1)	7	35.0					hypothetical protein
1177	GCA_003851495.1_01519	Pseudomonas synxantha 2-79(GCA_003851495.1)	1	5.0	K:COG3609	K07746			hypothetical protein
1178	GCA_003851925.1_02211	Pseudomonas chlororaphis subsp. aureofaciens ChPhzTR39(GCA_003851925.1)	1	5.0					hypothetical protein
1179	GCA_003851495.1_05008	Pseudomonas synxantha 2-79(GCA_003851495.1)	1	5.0		K02078			hypothetical protein
1180	GCA_000264555.1_05136	Pseudomonas chlororaphis subsp. aureofaciens O6(GCA_000264555.1)	12	60.0	S:ENOG410ZQQG	K02078			acyl carrier protein
1181	GCA_003850565.1_00843	CP027706_s CMR12a(GCA_003850565.1)	1	5.0					hypothetical protein
1182	GCA_000264555.1_02161	Pseudomonas chlororaphis subsp. aureofaciens O6(GCA_000264555.1)	3	15.0					hypothetical protein
1183	GCA_000264555.1_01206	Pseudomonas chlororaphis subsp. aureofaciens O6(GCA_000264555.1)	1	5.0					hypothetical protein
1184	GCA_000698865.1_04724	Pseudomonas chlororaphis subsp. aureofaciens PA23(GCA_000698865.1)	3	15.0					hypothetical protein
1185	GCA_003851835.1_04360	Pseudomonas chlororaphis subsp. aurantiaca DSM 19603(Type)(GCA_003851835.1)	2	10.0	S:COG4104				hypothetical protein
1186	GCA_000264555.1_06141	Pseudomonas chlororaphis subsp. aureofaciens O6(GCA_000264555.1)	20	100.0	K:COG1758	K03060	Clustering-based subsystems Probably GTP or GMP signaling related CBSS-176299.4.peg.1292 DNA-directed RNA polymerase omega subunit (EC 2.7.7.6)	GO:0003677,GO:0003899,GO:0006351	DNA-directed RNA polymerase	DNA-directed RNA polymerase
1187	GCA_003850365.1_03687	Pseudomonas chlororaphis subsp. piscium ATCC 17809(GCA_003850365.1)	1	5.0	S:ENOG410Y2TK	K22487			hypothetical protein
1188	GCA_000264555.1_04649	Pseudomonas chlororaphis subsp. aureofaciens O6(GCA_000264555.1)	19	95.0					hypothetical protein
1189	GCA_000698865.1_02155	Pseudomonas chlororaphis subsp. aureofaciens PA23(GCA_000698865.1)	4	20.0					hypothetical protein
1190	GCA_003851205.1_01922	Pseudomonas chlororaphis subsp. aurantiaca 449(GCA_003851205.1)	4	20.0	L:COG1484		Phages, Prophages, Transposable elements, Plasmids Transposable elements CBSS-203122.12.peg.188 ISPsy4, transposition helper protein	GO:0005524	Insertion sequence IS21-like putative ATP-binding protein	ATP-binding
1191	GCA_003850565.1_05539	CP027706_s CMR12a(GCA_003850565.1)	1	5.0					hypothetical protein
1192	GCA_000264555.1_04293	Pseudomonas chlororaphis subsp. aureofaciens O6(GCA_000264555.1)	20	100.0					hypothetical protein
1193	GCA_003850565.1_02627	CP027706_s CMR12a(GCA_003850565.1)	1	5.0	T:COG0642	K02484	Regulation and Cell signaling null Orphan_regulatory_proteins Sensory histidine kinase QseC	GO:0016021,GO:0005622,GO:0005886,GO:0005524,GO:0000155	Histidine kinase	ATP-binding
1194	GCA_000264555.1_05596	Pseudomonas chlororaphis subsp. aureofaciens O6(GCA_000264555.1)	20	100.0	J:COG0186	K02961	Protein Metabolism Protein biosynthesis Ribosome_SSU_bacterial SSU ribosomal protein S17p (S11e)	GO:0005840,GO:0019843,GO:0003735,GO:0006412	30S ribosomal protein S17	Ribonucleoprotein
1195	GCA_003851925.1_02629	Pseudomonas chlororaphis subsp. aureofaciens ChPhzTR39(GCA_003851925.1)	1	5.0	C:COG1018	K03863	Metabolism of Aromatic Compounds Peripheral pathways for catabolism of aromatic compounds Phenylpropanoid_compound_degradation Vanillate O-demethylase oxidoreductase (EC 1.14.13.-)	GO:0051537,GO:0009055,GO:0046872,GO:0004497,GO:0018620,GO:0046239	Phthalate 4,5-dioxygenase oxygenase reductase subunit	2Fe-2S				Contains 1 FAD-binding FR-type domain."
1196	GCA_000264555.1_01242	Pseudomonas chlororaphis subsp. aureofaciens O6(GCA_000264555.1)	1	5.0			Membrane Transport null Ton_and_Tol_transport_systems TolA protein		hypothetical protein
1197	GCA_000264555.1_03050	Pseudomonas chlororaphis subsp. aureofaciens O6(GCA_000264555.1)	20	100.0					hypothetical protein
1198	GCA_000963835.1_03152	CP010892_s PCL1606(GCA_000963835.1)	4	20.0	S:ENOG410Y81G				hypothetical protein
1199	GCA_000264555.1_03237	Pseudomonas chlororaphis subsp. aureofaciens O6(GCA_000264555.1)	16	80.0					hypothetical protein
1200	GCA_003851495.1_03267	Pseudomonas synxantha 2-79(GCA_003851495.1)	1	5.0					hypothetical protein
1201	GCA_000264555.1_03414	Pseudomonas chlororaphis subsp. aureofaciens O6(GCA_000264555.1)	20	100.0					hypothetical protein
1202	GCA_000281915.1_03643	Pseudomonas chlororaphis subsp. chlororaphis 30-84(GCA_000281915.1)	5	25.0	S:ENOG410XYX8				hypothetical protein
1203	GCA_000698865.1_05494	Pseudomonas chlororaphis subsp. aureofaciens PA23(GCA_000698865.1)	5	25.0	U:COG4794	K03227	Motility and Chemotaxis Flagellar motility in Prokaryota Flagellum Flagellar biosynthesis protein FliQ	GO:0016021,GO:0005886,GO:0009405,GO:0009306	Yop proteins translocation protein S	Cell membrane
1204	GCA_000698865.1_03441	Pseudomonas chlororaphis subsp. aureofaciens PA23(GCA_000698865.1)	1	5.0					hypothetical protein
1205	GCA_001921865.1_00883	MSCT_s PCL1601(GCA_001921865.1)	5	25.0					hypothetical protein
1206	GCA_000281915.1_01512	Pseudomonas chlororaphis subsp. chlororaphis 30-84(GCA_000281915.1)	1	5.0	S:COG3652	K08995			putative membrane protein
1207	GCA_003850565.1_05680	CP027706_s CMR12a(GCA_003850565.1)	1	5.0	S:COG5591				hypothetical protein
1208	GCA_003850565.1_02690	CP027706_s CMR12a(GCA_003850565.1)	1	5.0	S:ENOG410ZAV2				hypothetical protein
1209	GCA_000963835.1_00485	CP010892_s PCL1606(GCA_000963835.1)	1	5.0	U:COG5268	K20529	Virulence Type III, Type IV, Type VI, ESAT secretion systems Type_4_secretion_and_conjugative_transfer Conjugative transfer protein TrbD		type IV secretion system protein VirB3
1210	GCA_000264555.1_01720	Pseudomonas chlororaphis subsp. aureofaciens O6(GCA_000264555.1)	18	90.0					hypothetical protein
1211	GCA_000264555.1_05022	Pseudomonas chlororaphis subsp. aureofaciens O6(GCA_000264555.1)	3	15.0		K07733			prophage regulatory protein
1212	GCA_003851495.1_00156	Pseudomonas synxantha 2-79(GCA_003851495.1)	1	5.0					hypothetical protein
1213	GCA_003851835.1_03077	Pseudomonas chlororaphis subsp. aurantiaca DSM 19603(Type)(GCA_003851835.1)	1	5.0					hypothetical protein
1214	GCA_003851495.1_04267	Pseudomonas synxantha 2-79(GCA_003851495.1)	1	5.0		K07483			hypothetical protein
1215	GCA_000264555.1_00845	Pseudomonas chlororaphis subsp. aureofaciens O6(GCA_000264555.1)	20	100.0	J:COG0184	K02956	Protein Metabolism Protein biosynthesis Ribosome_SSU_bacterial SSU ribosomal protein S15p (S13e)	GO:0005840,GO:0019843,GO:0003735,GO:0006412	30S ribosomal protein S15	Ribonucleoprotein
1216	GCA_000264555.1_06040	Pseudomonas chlororaphis subsp. aureofaciens O6(GCA_000264555.1)	1	5.0	V:COG1680	K01467	Virulence Resistance to antibiotics and toxic compounds BlaR1_Family_Regulatory_Sensor-transducer_Disambiguation Beta-lactamase (EC 3.5.2.6)	GO:0030288,GO:0008800,GO:0017001,GO:0046677	Beta-lactamase	Antibiotic resistance
1217	GCA_000264555.1_01744	Pseudomonas chlororaphis subsp. aureofaciens O6(GCA_000264555.1)	20	100.0	N:COG1987	K02420	Motility and Chemotaxis Flagellar motility in Prokaryota Flagellum Flagellar biosynthesis protein FliQ	GO:0009425,GO:0016021,GO:0005886,GO:0044780,GO:0009306	Flagellar biosynthetic protein FliQ	Bacterial flagellum
1218	GCA_003851495.1_03841	Pseudomonas synxantha 2-79(GCA_003851495.1)	1	5.0	S:COG2929	K09803			hypothetical protein
1219	GCA_003851925.1_06248	Pseudomonas chlororaphis subsp. aureofaciens ChPhzTR39(GCA_003851925.1)	1	5.0	M:COG0787	K01775	Carbohydrates Central carbohydrate metabolism Pyruvate_Alanine_Serine_Interconversions Alanine racemase (EC 5.1.1.1)	GO:0008784,GO:0030170,GO:0006522	Alanine racemase	Isomerase
1220	GCA_000264555.1_05378	Pseudomonas chlororaphis subsp. aureofaciens O6(GCA_000264555.1)	20	100.0					hypothetical protein
1221	GCA_003850365.1_02619	Pseudomonas chlororaphis subsp. piscium ATCC 17809(GCA_003850365.1)	1	5.0	S:ENOG410XUZZ				hypothetical protein
1222	GCA_000264555.1_02778	Pseudomonas chlororaphis subsp. aureofaciens O6(GCA_000264555.1)	17	85.0	S:ENOG4111W20				hypothetical protein
1223	GCA_000264555.1_03204	Pseudomonas chlororaphis subsp. aureofaciens O6(GCA_000264555.1)	18	90.0	S:ENOG411258N				hypothetical protein
1224	GCA_000264555.1_03191	Pseudomonas chlororaphis subsp. aureofaciens O6(GCA_000264555.1)	6	30.0	S:ENOG410Z65R				hypothetical protein
1225	GCA_000264555.1_00358	Pseudomonas chlororaphis subsp. aureofaciens O6(GCA_000264555.1)	20	100.0	P:COG2924	K03575	Stress Response Heat shock Heat_shock_dnaK_gene_cluster_extended FIG001341: Probable Fe(2+)-trafficking protein YggX	GO:0005506	Adenine glycosylase	Iron.	Could be a mediator in iron transactions between iron acquisition and iron-requiring processes, such as synthesis and/or repair of Fe-S clusters in biosynthetic enzymes
1226	GCA_000264555.1_03082	Pseudomonas chlororaphis subsp. aureofaciens O6(GCA_000264555.1)	20	100.0					hypothetical protein
1227	GCA_001921865.1_01539	MSCT_s PCL1601(GCA_001921865.1)	1	5.0					hypothetical protein
1228	GCA_000698865.1_03440	Pseudomonas chlororaphis subsp. aureofaciens PA23(GCA_000698865.1)	1	5.0					hypothetical protein
1229	GCA_000264555.1_05294	Pseudomonas chlororaphis subsp. aureofaciens O6(GCA_000264555.1)	20	100.0	K:COG3070	K07343	Regulation and Cell signaling null Orphan_regulatory_proteins DNA transformation protein TfoX		DNA transformation protein and related proteins
1230	GCA_003851495.1_02666	Pseudomonas synxantha 2-79(GCA_003851495.1)	1	5.0	K:ENOG4112ACI	K07746			hypothetical protein
1231	GCA_000264555.1_00919	Pseudomonas chlororaphis subsp. aureofaciens O6(GCA_000264555.1)	20	100.0	G:COG1925	K11189	Regulation and Cell signaling null HPr_catabolite_repression_system Phosphocarrier protein of PTS system	GO:0005737,GO:0004674,GO:0009401	Phosphocarrier protein HPr	Cytoplasm
1232	GCA_003851835.1_03404	Pseudomonas chlororaphis subsp. aurantiaca DSM 19603(Type)(GCA_003851835.1)	1	5.0	C:COG0778	K15976	RNA Metabolism RNA processing and modification Queuosine-Archaeosine_Biosynthesis Permease of the drug/metabolite transporter (DMT) superfamily		hypothetical protein		KEGG: pbv:AR543_08910 putative NAD(P)H nitroreductase
1233	GCA_000698865.1_05019	Pseudomonas chlororaphis subsp. aureofaciens PA23(GCA_000698865.1)	4	20.0					hypothetical protein
1234	GCA_000281915.1_03796	Pseudomonas chlororaphis subsp. chlororaphis 30-84(GCA_000281915.1)	1	5.0	C:COG1902	K00219	Fatty Acids, Lipids, and Isoprenoids Fatty acids Fatty_acid_degradation_regulons 2,4-dienoyl-CoA reductase [NADPH] (EC 1.3.1.34)		2,4-dienoyl-CoA reductase (NADPH)		KEGG: bur:Bcep18194_B2709 2,4-dienoyl-CoA reductase (NADPH2)
1235	GCA_000264555.1_02136	Pseudomonas chlororaphis subsp. aureofaciens O6(GCA_000264555.1)	3	15.0					hypothetical protein
1236	GCA_003850565.1_05291	CP027706_s CMR12a(GCA_003850565.1)	1	5.0					hypothetical protein
1237	GCA_000264555.1_04011	Pseudomonas chlororaphis subsp. aureofaciens O6(GCA_000264555.1)	19	95.0	S:COG5477				hypothetical protein
1238	GCA_000264555.1_04765	Pseudomonas chlororaphis subsp. aureofaciens O6(GCA_000264555.1)	20	100.0					hypothetical protein
1239	GCA_000264555.1_03833	Pseudomonas chlororaphis subsp. aureofaciens O6(GCA_000264555.1)	17	85.0					hypothetical protein
1240	GCA_000963835.1_03561	CP010892_s PCL1606(GCA_000963835.1)	1	5.0					hypothetical protein
1241	GCA_000264555.1_03950	Pseudomonas chlororaphis subsp. aureofaciens O6(GCA_000264555.1)	17	85.0					hypothetical protein
1242	GCA_000264555.1_04941	Pseudomonas chlororaphis subsp. aureofaciens O6(GCA_000264555.1)	20	100.0	J:COG0254	K02909	Protein Metabolism Protein biosynthesis Ribosome_LSU_bacterial LSU ribosomal protein L31p	GO:0005840,GO:0003735,GO:0006412	50S ribosomal protein L31 type B	Ribonucleoprotein
1243	GCA_003851495.1_03498	Pseudomonas synxantha 2-79(GCA_003851495.1)	1	5.0	L:COG0776	K03530	DNA Metabolism null DNA_structural_proteins,_bacterial DNA-binding protein HU-beta	GO:0003677,GO:0030261	DNA-binding protein HU-1	DNA condensation
1244	GCA_000281915.1_02356	Pseudomonas chlororaphis subsp. chlororaphis 30-84(GCA_000281915.1)	12	60.0					hypothetical protein
1245	GCA_000264555.1_02536	Pseudomonas chlororaphis subsp. aureofaciens O6(GCA_000264555.1)	18	90.0	S:COG1937	K21600	Stress Response Detoxification Glutathione-dependent_pathway_of_formaldehyde_detoxification Uncharacterized protein YaiN in in formaldehyde detoxification operon	GO:0005737,GO:0003677,GO:0046872,GO:0006355,GO:0006351	Transcriptional repressor FrmR	Cytoplasm
1246	GCA_000264555.1_00401	Pseudomonas chlororaphis subsp. aureofaciens O6(GCA_000264555.1)	11	55.0	S:ENOG41123HG		Regulation and Cell signaling Programmed Cell Death and Toxin-antitoxin Systems Phd-Doc,_YdcE-YdcD_toxin-antitoxin_(programmed_cell_death)_systems Prevent host death protein, Phd antitoxin		hypothetical protein
1247	GCA_000264555.1_01444	Pseudomonas chlororaphis subsp. aureofaciens O6(GCA_000264555.1)	8	40.0					hypothetical protein
1248	GCA_000264555.1_05026	Pseudomonas chlororaphis subsp. aureofaciens O6(GCA_000264555.1)	4	20.0					hypothetical protein
1249	GCA_003851265.1_04291	Pseudomonas chlororaphis subsp. aurantiaca M71(GCA_003851265.1)	1	5.0					hypothetical protein
1250	GCA_000698865.1_04728	Pseudomonas chlororaphis subsp. aureofaciens PA23(GCA_000698865.1)	4	20.0	S:ENOG4111PA2		Clustering-based subsystems null CBSS-316273.3.peg.2709 FIG041301: Hypothetical protein		hypothetical protein
1251	GCA_003851835.1_00235	Pseudomonas chlororaphis subsp. aurantiaca DSM 19603(Type)(GCA_003851835.1)	1	5.0					hypothetical protein
1252	GCA_000698865.1_01355	Pseudomonas chlororaphis subsp. aureofaciens PA23(GCA_000698865.1)	5	25.0	S:ENOG4111P7Q	K00657			Diamine N-acetyltransferase		KEGG: pch:EY04_06805 diamine N-acetyltransferase
1253	GCA_003850565.1_02384	CP027706_s CMR12a(GCA_003850565.1)	1	5.0	S:COG1937	K21600	Stress Response Detoxification Glutathione-dependent_pathway_of_formaldehyde_detoxification Uncharacterized protein YaiN in in formaldehyde detoxification operon	GO:0005737,GO:0003677,GO:0046872,GO:0006355,GO:0006351	Transcriptional repressor FrmR	Cytoplasm
1254	GCA_000264555.1_01934	Pseudomonas chlororaphis subsp. aureofaciens O6(GCA_000264555.1)	20	100.0	S:ENOG41127X2				hypothetical protein
1255	GCA_003851925.1_05178	Pseudomonas chlororaphis subsp. aureofaciens ChPhzTR39(GCA_003851925.1)	1	5.0	K:ENOG41127SZ				hypothetical protein
1256	GCA_000264555.1_03826	Pseudomonas chlororaphis subsp. aureofaciens O6(GCA_000264555.1)	20	100.0	O:COG0760	K03769	Protein Metabolism Protein folding Peptidyl-prolyl_cis-trans_isomerase Peptidyl-prolyl cis-trans isomerase ppiC (EC 5.2.1.8)	GO:0030288,GO:0042277,GO:0003755,GO:0051085,GO:0043165,GO:0060274,GO:0050821	Peptidylprolyl isomerase	Chaperone
1257	GCA_000698865.1_02941	Pseudomonas chlororaphis subsp. aureofaciens PA23(GCA_000698865.1)	1	5.0	Q:ENOG410XV4E		Fatty Acids, Lipids, and Isoprenoids Phospholipids Glycerolipid_and_Glycerophospholipid_Metabolism_in_Bacteria Acyl carrier protein		hypothetical protein
1258	GCA_000264555.1_06177	Pseudomonas chlororaphis subsp. aureofaciens O6(GCA_000264555.1)	20	100.0	L:COG0776	K05787	DNA Metabolism null DNA_structural_proteins,_bacterial DNA-binding protein HU-alpha	GO:0003677,GO:0030261	DNA-binding protein HU-alpha	DNA condensation
1259	GCA_003851495.1_00800	Pseudomonas synxantha 2-79(GCA_003851495.1)	1	5.0					hypothetical protein
1260	GCA_000698865.1_01133	Pseudomonas chlororaphis subsp. aureofaciens PA23(GCA_000698865.1)	11	55.0					hypothetical protein
1261	GCA_000264555.1_00435	Pseudomonas chlororaphis subsp. aureofaciens O6(GCA_000264555.1)	20	100.0	S:ENOG410XX2G				hypothetical protein
1262	GCA_000264555.1_05601	Pseudomonas chlororaphis subsp. aureofaciens O6(GCA_000264555.1)	20	100.0	J:COG0185	K02965	Protein Metabolism Protein biosynthesis Ribosome_SSU_bacterial SSU ribosomal protein S19p (S15e)	GO:0009507,GO:0015935,GO:0019843,GO:0003735,GO:0006412	30S ribosomal protein S19, chloroplastic	Chloroplast
1263	GCA_003851495.1_02400	Pseudomonas synxantha 2-79(GCA_003851495.1)	1	5.0					hypothetical protein
1264	GCA_000264555.1_02060	Pseudomonas chlororaphis subsp. aureofaciens O6(GCA_000264555.1)	20	100.0	S:ENOG410ZU36				hypothetical protein
1265	GCA_003850565.1_01477	CP027706_s CMR12a(GCA_003850565.1)	1	5.0					hypothetical protein
1266	GCA_003850445.1_03358	Pseudomonas chlororaphis subsp. piscium PCL1391(GCA_003850445.1)	2	10.0					hypothetical protein
1267	GCA_000264555.1_00234	Pseudomonas chlororaphis subsp. aureofaciens O6(GCA_000264555.1)	20	100.0					hypothetical protein
1268	GCA_003850565.1_01469	CP027706_s CMR12a(GCA_003850565.1)	1	5.0					hypothetical protein
1269	GCA_003851495.1_04090	Pseudomonas synxantha 2-79(GCA_003851495.1)	1	5.0	S:COG2929	K09803			hypothetical protein
1270	GCA_000264555.1_05038	Pseudomonas chlororaphis subsp. aureofaciens O6(GCA_000264555.1)	19	95.0					hypothetical protein
1271	GCA_000264555.1_05481	Pseudomonas chlororaphis subsp. aureofaciens O6(GCA_000264555.1)	20	100.0	S:COG2921	K09158	Cofactors, Vitamins, Prosthetic Groups, Pigments Lipoic acid Lipoic_acid_metabolism Proposed lipoate regulatory protein YbeD		UPF0250 protein Pfl01_4965		Belongs to the UPF0250 family.
1272	GCA_000264555.1_05689	Pseudomonas chlororaphis subsp. aureofaciens O6(GCA_000264555.1)	20	100.0	H:ENOG4112213	K06138	Cofactors, Vitamins, Prosthetic Groups, Pigments Quinone cofactors Coenzyme_PQQ_synthesis Coenzyme PQQ synthesis protein D	GO:0003824,GO:0048038,GO:0018189	Coenzyme PQQ synthesis protein D	PQQ biosynthesis.	Belongs to the PqqD family.
1273	GCA_000281915.1_01647	Pseudomonas chlororaphis subsp. chlororaphis 30-84(GCA_000281915.1)	13	65.0					hypothetical protein
1274	GCA_000281915.1_01004	Pseudomonas chlororaphis subsp. chlororaphis 30-84(GCA_000281915.1)	4	20.0	S:ENOG41123DS	K19092	Regulation and Cell signaling Programmed Cell Death and Toxin-antitoxin Systems Phd-Doc,_YdcE-YdcD_toxin-antitoxin_(programmed_cell_death)_systems Death on curing protein, Doc toxin		toxin ParE1/3/4
1275	GCA_000264555.1_01348	Pseudomonas chlororaphis subsp. aureofaciens O6(GCA_000264555.1)	19	95.0	S:COG3776	K08993			putative membrane protein
1276	GCA_003850565.1_04817	CP027706_s CMR12a(GCA_003850565.1)	1	5.0					hypothetical protein
1277	GCA_003851495.1_03543	Pseudomonas synxantha 2-79(GCA_003851495.1)	1	5.0					hypothetical protein
1278	GCA_000264555.1_00429	Pseudomonas chlororaphis subsp. aureofaciens O6(GCA_000264555.1)	20	100.0	U:ENOG410XUF0	K03116	Clustering-based subsystems proteosome related Cluster-based_Subsystem_Grouping_Hypotheticals_-_perhaps_Proteosome_Related Twin-arginine translocation protein TatA	GO:0005887,GO:0033281,GO:0008320,GO:0009306,GO:0043953	Sec-independent protein translocase protein TatA	Cell inner membrane
1279	GCA_000264555.1_04470	Pseudomonas chlororaphis subsp. aureofaciens O6(GCA_000264555.1)	20	100.0					hypothetical protein
1280	GCA_003850565.1_01467	CP027706_s CMR12a(GCA_003850565.1)	1	5.0	S:ENOG411220R	K02342			DNA-directed DNA polymerase		KEGG: mhos:CXR34_08290 DNA polymerase III subunit epsilon
1281	GCA_000264555.1_01189	Pseudomonas chlororaphis subsp. aureofaciens O6(GCA_000264555.1)	20	100.0	D:COG2919	K05589	Cell Division and Cell Cycle null Bacterial_Cytoskeleton Cell division protein FtsB	GO:0032153,GO:0005887,GO:0043093	Cell division protein FtsB	Cell cycle
1282	GCA_000264555.1_04141	Pseudomonas chlororaphis subsp. aureofaciens O6(GCA_000264555.1)	13	65.0	S:ENOG41129PJ				hypothetical protein
1283	GCA_003851785.1_05415	Pseudomonas chlororaphis subsp. aureofaciens Pb-St2(GCA_003851785.1)	1	5.0					hypothetical protein
1284	GCA_003850565.1_03158	CP027706_s CMR12a(GCA_003850565.1)	1	5.0	T:COG3279				hypothetical protein
1285	GCA_000281915.1_00937	Pseudomonas chlororaphis subsp. chlororaphis 30-84(GCA_000281915.1)	10	50.0	V:COG0732	K01154	DNA Metabolism null Restriction-Modification_System Type I restriction-modification system, specificity subunit S (EC 3.1.21.3)		Type I site-specific deoxyribonuclease		KEGG: lez:GLE_0006 type I restriction enzyme, S subunit
1286	GCA_000264555.1_05214	Pseudomonas chlororaphis subsp. aureofaciens O6(GCA_000264555.1)	11	55.0	K:ENOG410XVY6	K19000	RNA Metabolism Transcription Transcription_factors_bacterial Rho-specific inhibitor of transcription termination (YaeO)		Rho-binding antiterminator
1287	GCA_003850565.1_03052	CP027706_s CMR12a(GCA_003850565.1)	1	5.0	S:ENOG410Y272	K07746			hypothetical protein
1288	GCA_000963835.1_02894	CP010892_s PCL1606(GCA_000963835.1)	1	5.0	S:ENOG411270Q				hypothetical protein
1289	GCA_000264555.1_05059	Pseudomonas chlororaphis subsp. aureofaciens O6(GCA_000264555.1)	18	90.0	Q:COG3321	K20422			Neocarzinostatin naphthoate synthase		KEGG: saq:Sare_4951 neocarzinostatin naphthoate synthase
1290	GCA_003851905.1_03057	Pseudomonas chlororaphis subsp. aureofaciens DSM 6698(Type)(GCA_003851905.1)	1	5.0	T:COG0589	K14055	Stress Response null Universal_stress_protein_family Universal stress protein family 5		hypothetical protein
1291	GCA_003851495.1_03100	Pseudomonas synxantha 2-79(GCA_003851495.1)	1	5.0					hypothetical protein
1292	GCA_000264555.1_02635	Pseudomonas chlororaphis subsp. aureofaciens O6(GCA_000264555.1)	20	100.0	P:COG2212	K05563	Membrane Transport Uni- Sym- and Antiporters Sodium_Hydrogen_Antiporter Na(+) H(+) antiporter subunit F	GO:0016021,GO:0005886,GO:0015075	PhaF2 protein	Cell membrane
1293	GCA_003851495.1_04374	Pseudomonas synxantha 2-79(GCA_003851495.1)	1	5.0					hypothetical protein
1294	GCA_000264555.1_04410	Pseudomonas chlororaphis subsp. aureofaciens O6(GCA_000264555.1)	20	100.0	S:ENOG410Z7SB				hypothetical protein
1295	GCA_000264555.1_03593	Pseudomonas chlororaphis subsp. aureofaciens O6(GCA_000264555.1)	9	45.0					hypothetical protein
1296	GCA_003850365.1_04904	Pseudomonas chlororaphis subsp. piscium ATCC 17809(GCA_003850365.1)	1	5.0					hypothetical protein
1297	GCA_000264555.1_03038	Pseudomonas chlororaphis subsp. aureofaciens O6(GCA_000264555.1)	18	90.0	Q:COG3460	K02610	Metabolism of Aromatic Compounds null Phenylacetyl-CoA_catabolic_pathway_(core) Phenylacetate-CoA oxygenase, PaaH subunit	GO:0010124	1,2-phenylacetyl-CoA epoxidase, subunit B		Component of 1,2-phenylacetyl-CoA epoxidase multicomponent enzyme system which catalyzes the reduction of phenylacetyl-CoA (PA-CoA) to form 1,2-epoxyphenylacetyl-CoA. The subunit B may play a regulatory role or be directly involved in electron transport.
1298	GCA_000963835.1_05824	CP010892_s PCL1606(GCA_000963835.1)	10	50.0	S:ENOG4111YZP		Regulation and Cell signaling Programmed Cell Death and Toxin-antitoxin Systems Phd-Doc,_YdcE-YdcD_toxin-antitoxin_(programmed_cell_death)_systems Prevent host death protein, Phd antitoxin		hypothetical protein
1299	GCA_000281915.1_00043	Pseudomonas chlororaphis subsp. chlororaphis 30-84(GCA_000281915.1)	1	5.0	C:COG1018	K21607	Metabolism of Aromatic Compounds Peripheral pathways for catabolism of aromatic compounds Phenylpropanoid_compound_degradation Vanillate O-demethylase oxidoreductase (EC 1.14.13.-)	GO:0051537,GO:0009055,GO:0046872,GO:0016491,GO:0019439	Tetrachlorobenzoquinone reductase	2Fe-2S
1300	GCA_003850465.1_00677	Pseudomonas chlororaphis subsp. piscium PCL1607(GCA_003850465.1)	1	5.0					hypothetical protein
1301	GCA_000264555.1_05370	Pseudomonas chlororaphis subsp. aureofaciens O6(GCA_000264555.1)	20	100.0	J:COG0268	K02968	Protein Metabolism Protein biosynthesis Ribosome_SSU_bacterial SSU ribosomal protein S20p	GO:0005840,GO:0019843,GO:0003735,GO:0006412	30S ribosomal protein S20	Ribonucleoprotein
1302	GCA_003850445.1_02165	Pseudomonas chlororaphis subsp. piscium PCL1391(GCA_003850445.1)	3	15.0					hypothetical protein
1303	GCA_003851495.1_01703	Pseudomonas synxantha 2-79(GCA_003851495.1)	1	5.0					hypothetical protein
1304	GCA_000264555.1_04287	Pseudomonas chlororaphis subsp. aureofaciens O6(GCA_000264555.1)	20	100.0	S:ENOG410Y3MJ				hypothetical protein
1305	GCA_000963835.1_00493	CP010892_s PCL1606(GCA_000963835.1)	1	5.0	S:COG5639	K01918			Pantoate--beta-alanine ligase (AMP-forming)		KEGG: zmo:ZMO1971 pantoate--beta-alanine ligase
1306	GCA_000264555.1_05025	Pseudomonas chlororaphis subsp. aureofaciens O6(GCA_000264555.1)	4	20.0					hypothetical protein
1307	GCA_000264555.1_04978	Pseudomonas chlororaphis subsp. aureofaciens O6(GCA_000264555.1)	19	95.0	S:ENOG41122IU				hypothetical protein
1308	GCA_003851495.1_01801	Pseudomonas synxantha 2-79(GCA_003851495.1)	1	5.0	S:COG2354	K09781		GO:0016021,GO:0005886	Inner membrane protein YedI	Cell inner membrane
1309	GCA_000698865.1_03452	Pseudomonas chlororaphis subsp. aureofaciens PA23(GCA_000698865.1)	1	5.0					hypothetical protein
1310	GCA_000264555.1_01057	Pseudomonas chlororaphis subsp. aureofaciens O6(GCA_000264555.1)	20	100.0	L:COG0776	K04764	DNA Metabolism null DNA_structural_proteins,_bacterial Integration host factor alpha subunit	GO:0003677,GO:0006310,GO:0006355,GO:0006417,GO:0006351	Integration host factor subunit alpha 1	DNA recombination
1311	GCA_000264555.1_02288	Pseudomonas chlororaphis subsp. aureofaciens O6(GCA_000264555.1)	19	95.0					hypothetical protein
1312	GCA_000264555.1_02777	Pseudomonas chlororaphis subsp. aureofaciens O6(GCA_000264555.1)	16	80.0	S:ENOG410XXD4				hypothetical protein
1313	GCA_000698865.1_05435	Pseudomonas chlororaphis subsp. aureofaciens PA23(GCA_000698865.1)	1	5.0					hypothetical protein
1314	GCA_000264555.1_04688	Pseudomonas chlororaphis subsp. aureofaciens O6(GCA_000264555.1)	14	70.0	S:ENOG4111WWV		Regulation and Cell signaling Programmed Cell Death and Toxin-antitoxin Systems Toxin-antitoxin_replicon_stabilization_systems StbD replicon stabilization protein (antitoxin to StbE)		hypothetical protein
1315	GCA_000264555.1_02798	Pseudomonas chlororaphis subsp. aureofaciens O6(GCA_000264555.1)	20	100.0					hypothetical protein
1316	GCA_003851495.1_02955	Pseudomonas synxantha 2-79(GCA_003851495.1)	1	5.0					hypothetical protein
1317	GCA_000963835.1_02758	CP010892_s PCL1606(GCA_000963835.1)	1	5.0			Iron acquisition and metabolism Siderophores Siderophore_pyochelin Hypothetical protein FtpB in pyochelin gene cluster	GO:0016021,GO:0005886	Protein FptB	Cell membrane
1318	GCA_000264555.1_03816	Pseudomonas chlororaphis subsp. aureofaciens O6(GCA_000264555.1)	20	100.0	O:COG0760	K03769	Protein Metabolism Protein folding Peptidyl-prolyl_cis-trans_isomerase Peptidyl-prolyl cis-trans isomerase ppiC (EC 5.2.1.8)	GO:0030288,GO:0042277,GO:0003755,GO:0051085,GO:0043165,GO:0060274,GO:0050821	Peptidylprolyl isomerase	Chaperone
1319	GCA_000963835.1_02402	CP010892_s PCL1606(GCA_000963835.1)	6	30.0	S:ENOG410ZU0E				hypothetical protein
1320	GCA_003851495.1_04015	Pseudomonas synxantha 2-79(GCA_003851495.1)	1	5.0	S:ENOG410XW1V				hypothetical protein
1321	GCA_000698865.1_02980	Pseudomonas chlororaphis subsp. aureofaciens PA23(GCA_000698865.1)	6	30.0	K:COG1396				hypothetical protein
1322	GCA_003850445.1_02454	Pseudomonas chlororaphis subsp. piscium PCL1391(GCA_003850445.1)	2	10.0		K18100			hypothetical protein		KEGG: pcp:JM49_17790 rhamnosyltransferase subunit A
1323	GCA_000264555.1_02091	Pseudomonas chlororaphis subsp. aureofaciens O6(GCA_000264555.1)	6	30.0	S:ENOG41120MS				hypothetical protein
1324	GCA_000264555.1_02582	Pseudomonas chlororaphis subsp. aureofaciens O6(GCA_000264555.1)	20	100.0					hypothetical protein
1325	GCA_000264555.1_03885	Pseudomonas chlororaphis subsp. aureofaciens O6(GCA_000264555.1)	17	85.0					hypothetical protein
1326	GCA_000264555.1_01952	Pseudomonas chlororaphis subsp. aureofaciens O6(GCA_000264555.1)	15	75.0					hypothetical protein
1327	GCA_000264555.1_06068	Pseudomonas chlororaphis subsp. aureofaciens O6(GCA_000264555.1)	1	5.0	S:COG0666	K06867	Carbohydrates Glycoside hydrolases Predicted_carbohydrate_hydrolases Polysaccharide deacetylase	GO:0000775,GO:0000781,GO:0005829,GO:0005794,GO:0000139,GO:0000784,GO:0031965,GO:0005643,GO:0000242,GO:0000922,GO:0003950,GO:0008270,GO:0051301,GO:0007067,GO:0007052,GO:0051028,GO:0043392,GO:0018105,GO:0018107,GO:0090263,GO:0032212,GO:0045944,GO:0006471,GO:0070213,GO:0070198,GO:0070212,GO:0000209,GO:0015031,GO:0032210,GO:0051225,GO:0016055	Tankyrase-1	ADP-ribosylation				mRNA transport	NAD	Nuclear pore complex	Nucleus	Phosphoprotein	Protein transport	Repeat	Telomere	Transferase	Translocation	Transport	Ubl conjugation	Wnt signaling pathway	Zinc.","Poly-ADP-ribosyltransferase involved in various processes such as Wnt signaling pathway, telomere length and vesicle trafficking. Acts as an activator of the Wnt signaling pathway by mediating poly-ADP-ribosylation (PARsylation) of AXIN1 and AXIN2, 2 key components of the beta-catenin destruction complex: poly-ADP-ribosylated target proteins are recognized by RNF146, which mediates their …	Contains 15 ANK repeats	Contains 1 PARP catalytic domain	Contains 1 SAM (sterile alpha motif) domain."
1328	GCA_000264555.1_04430	Pseudomonas chlororaphis subsp. aureofaciens O6(GCA_000264555.1)	17	85.0	S:ENOG410Y3MJ				hypothetical protein
1329	GCA_003851165.1_03514	Pseudomonas chlororaphis subsp. aurantiaca M12(GCA_003851165.1)	5	25.0	V:COG1680				hypothetical protein
1330	GCA_000264555.1_04394	Pseudomonas chlororaphis subsp. aureofaciens O6(GCA_000264555.1)	20	100.0	S:COG2388	K06975			Protein NATD1		Belongs to the NATD1 family
1331	GCA_000264555.1_00175	Pseudomonas chlororaphis subsp. aureofaciens O6(GCA_000264555.1)	14	70.0	DJ:COG2026	K06218	Regulation and Cell signaling Programmed Cell Death and Toxin-antitoxin Systems Toxin-antitoxin_replicon_stabilization_systems StbE replicon stabilization toxin	GO:0004521,GO:0043022,GO:0019843,GO:0034198,GO:0006402,GO:0017148,GO:0006355,GO:0046677,GO:0090502,GO:0006351	mRNA interferase RelE	Antibiotic resistance				Cross-talk can occur between different TA modules. Ectopic expression of this toxin induces transcription of 7 tested TA modules (dinJ/yafQ, hicAB, mazEF, mqsRA, prlF(sohA)/yhaV, relBEF and yefM/yoeB) with specific cleavage of the relBEF mRNA produced immediately upstream and within the relB coding sequence. The cleaved mRNA can be translated into RelE, leading to a positive feedback cycle of Rel…	Belongs to the RelE toxin family."
1332	GCA_000264555.1_01231	Pseudomonas chlororaphis subsp. aureofaciens O6(GCA_000264555.1)	2	10.0	S:ENOG410ZCKQ				hypothetical protein
1333	GCA_003850565.1_03122	CP027706_s CMR12a(GCA_003850565.1)	1	5.0					hypothetical protein
1334	GCA_003850365.1_00756	Pseudomonas chlororaphis subsp. piscium ATCC 17809(GCA_003850365.1)	4	20.0					hypothetical protein
1335	GCA_000264555.1_00811	Pseudomonas chlororaphis subsp. aureofaciens O6(GCA_000264555.1)	20	100.0					hypothetical protein
1336	GCA_003851495.1_02775	Pseudomonas synxantha 2-79(GCA_003851495.1)	1	5.0					hypothetical protein
1337	GCA_000264555.1_02910	Pseudomonas chlororaphis subsp. aureofaciens O6(GCA_000264555.1)	18	90.0	S:COG1359				hypothetical protein
1338	GCA_003850365.1_03660	Pseudomonas chlororaphis subsp. piscium ATCC 17809(GCA_003850365.1)	1	5.0	S:ENOG411208W	K09780			hypothetical protein
1339	GCA_003850445.1_03369	Pseudomonas chlororaphis subsp. piscium PCL1391(GCA_003850445.1)	2	10.0					hypothetical protein
1340	GCA_000963835.1_00465	CP010892_s PCL1606(GCA_000963835.1)	1	5.0	K:ENOG4111UXI				hypothetical protein
1341	GCA_000264555.1_02832	Pseudomonas chlororaphis subsp. aureofaciens O6(GCA_000264555.1)	19	95.0					hypothetical protein
1342	GCA_000963835.1_04182	CP010892_s PCL1606(GCA_000963835.1)	2	10.0					hypothetical protein
1343	GCA_000264555.1_03528	Pseudomonas chlororaphis subsp. aureofaciens O6(GCA_000264555.1)	20	100.0	S:ENOG410Y3MJ				hypothetical protein
1344	GCA_000264555.1_01226	Pseudomonas chlororaphis subsp. aureofaciens O6(GCA_000264555.1)	1	5.0					hypothetical protein
1345	GCA_000264555.1_02795	Pseudomonas chlororaphis subsp. aureofaciens O6(GCA_000264555.1)	4	20.0					hypothetical protein
1346	GCA_003851495.1_03286	Pseudomonas synxantha 2-79(GCA_003851495.1)	1	5.0					hypothetical protein
1347	GCA_000264555.1_04333	Pseudomonas chlororaphis subsp. aureofaciens O6(GCA_000264555.1)	20	100.0	S:COG3123	K09913	Clustering-based subsystems null CBSS-562.2.peg.5158_SK3_including Cytoplasmic protein YaiE		Purine-nucleoside phosphorylase		Belongs to the UPF0345 family.
1348	GCA_003851495.1_03223	Pseudomonas synxantha 2-79(GCA_003851495.1)	1	5.0					hypothetical protein
1349	GCA_003850445.1_03550	Pseudomonas chlororaphis subsp. piscium PCL1391(GCA_003850445.1)	3	15.0	S:ENOG410Y4GC				hypothetical protein
1350	GCA_000264555.1_01104	Pseudomonas chlororaphis subsp. aureofaciens O6(GCA_000264555.1)	20	100.0					hypothetical protein
1351	GCA_003850365.1_05312	Pseudomonas chlororaphis subsp. piscium ATCC 17809(GCA_003850365.1)	1	5.0	S:COG0491	K01069	Stress Response Oxidative stress Glutathione:_Non-redox_reactions Hydroxyacylglutathione hydrolase (EC 3.1.2.6)	GO:0005829,GO:0004416,GO:0046872,GO:0019243	Hydroxyacylglutathione hydrolase	Hydrolase
1352	GCA_003850565.1_05527	CP027706_s CMR12a(GCA_003850565.1)	1	5.0					hypothetical protein
1353	GCA_000963835.1_05825	CP010892_s PCL1606(GCA_000963835.1)	9	45.0	S:COG3668	K19092	Regulation and Cell signaling Programmed Cell Death and Toxin-antitoxin Systems Phd-Doc,_YdcE-YdcD_toxin-antitoxin_(programmed_cell_death)_systems Death on curing protein, Doc toxin		toxin ParE1/3/4
1354	GCA_003850565.1_05313	CP027706_s CMR12a(GCA_003850565.1)	1	5.0					hypothetical protein
1355	GCA_000264555.1_04392	Pseudomonas chlororaphis subsp. aureofaciens O6(GCA_000264555.1)	20	100.0	S:ENOG4111YRY				hypothetical protein
1356	GCA_003850565.1_01516	CP027706_s CMR12a(GCA_003850565.1)	1	5.0					hypothetical protein
1357	GCA_000264555.1_00903	Pseudomonas chlororaphis subsp. aureofaciens O6(GCA_000264555.1)	20	100.0	J:COG0721	K02435	Miscellaneous Plant-Prokaryote DOE project At3g21300 Glutamyl-tRNA(Gln) amidotransferase subunit C (EC 6.3.5.7)	GO:0005524,GO:0050567,GO:0006450,GO:0006412	Asparaginyl-tRNA synthase (glutamine-hydrolyzing)	ATP-binding
1358	GCA_000264555.1_01212	Pseudomonas chlororaphis subsp. aureofaciens O6(GCA_000264555.1)	1	5.0	K:COG2932			GO:0043565,GO:0030152,GO:1900377,GO:0006355,GO:0006351	HTH-type transcriptional regulator PrtR	Antibiotic biosynthesis
1359	GCA_000264555.1_05168	Pseudomonas chlororaphis subsp. aureofaciens O6(GCA_000264555.1)	20	100.0	S:ENOG411020Q				hypothetical protein
1360	GCA_000264555.1_01233	Pseudomonas chlororaphis subsp. aureofaciens O6(GCA_000264555.1)	1	5.0					hypothetical protein
1361	GCA_003851905.1_03522	Pseudomonas chlororaphis subsp. aureofaciens DSM 6698(Type)(GCA_003851905.1)	1	5.0					hypothetical protein
1362	GCA_000264555.1_00804	Pseudomonas chlororaphis subsp. aureofaciens O6(GCA_000264555.1)	15	75.0					hypothetical protein
1363	GCA_003851835.1_03556	Pseudomonas chlororaphis subsp. aurantiaca DSM 19603(Type)(GCA_003851835.1)	1	5.0					hypothetical protein
1364	GCA_000698865.1_02488	Pseudomonas chlororaphis subsp. aureofaciens PA23(GCA_000698865.1)	4	20.0					hypothetical protein
1365	GCA_000264555.1_05500	Pseudomonas chlororaphis subsp. aureofaciens O6(GCA_000264555.1)	20	100.0	S:COG5645				hypothetical protein
1366	GCA_000264555.1_02138	Pseudomonas chlororaphis subsp. aureofaciens O6(GCA_000264555.1)	3	15.0					hypothetical protein
1367	GCA_003851495.1_01860	Pseudomonas synxantha 2-79(GCA_003851495.1)	1	5.0					hypothetical protein
1368	GCA_000698865.1_02024	Pseudomonas chlororaphis subsp. aureofaciens PA23(GCA_000698865.1)	5	25.0					hypothetical protein
1369	GCA_003851265.1_00353	Pseudomonas chlororaphis subsp. aurantiaca M71(GCA_003851265.1)	1	5.0					hypothetical protein
1370	GCA_000264555.1_00084	Pseudomonas chlororaphis subsp. aureofaciens O6(GCA_000264555.1)	20	100.0	S:ENOG410Y16T				hypothetical protein
1371	GCA_000281915.1_02280	Pseudomonas chlororaphis subsp. chlororaphis 30-84(GCA_000281915.1)	1	5.0					hypothetical protein
1372	GCA_000963835.1_00468	CP010892_s PCL1606(GCA_000963835.1)	1	5.0	S:ENOG411234G				hypothetical protein
1373	GCA_000281915.1_02627	Pseudomonas chlororaphis subsp. chlororaphis 30-84(GCA_000281915.1)	5	25.0	S:ENOG41128V4				hypothetical protein
1374	GCA_000963835.1_02594	CP010892_s PCL1606(GCA_000963835.1)	7	35.0	S:ENOG41125J4	K03623			hypothetical protein
1375	GCA_003851495.1_03666	Pseudomonas synxantha 2-79(GCA_003851495.1)	1	5.0	DJ:COG2026	K06218	Regulation and Cell signaling Programmed Cell Death and Toxin-antitoxin Systems Toxin-antitoxin_replicon_stabilization_systems RelE antibacterial toxin protein	GO:0004521,GO:0043022,GO:0019843,GO:0034198,GO:0006402,GO:0017148,GO:0006355,GO:0046677,GO:0090502,GO:0006351	mRNA interferase RelE	Antibiotic resistance				Cross-talk can occur between different TA modules. Ectopic expression of this toxin induces transcription of 7 tested TA modules (dinJ/yafQ, hicAB, mazEF, mqsRA, prlF(sohA)/yhaV, relBEF and yefM/yoeB) with specific cleavage of the relBEF mRNA produced immediately upstream and within the relB coding sequence. The cleaved mRNA can be translated into RelE, leading to a positive feedback cycle of Rel…	Belongs to the RelE toxin family."
1376	GCA_003851495.1_02152	Pseudomonas synxantha 2-79(GCA_003851495.1)	1	5.0	S:ENOG41129MJ				hypothetical protein
1377	GCA_000264555.1_00056	Pseudomonas chlororaphis subsp. aureofaciens O6(GCA_000264555.1)	20	100.0	S:COG3529	K07070	Potassium metabolism null Potassium_homeostasis Putative cytoplasmic protein ,probably associated with Glutathione-regulated potassium-efflux		Uncharacterized protein YheV
1378	GCA_000264555.1_00096	Pseudomonas chlororaphis subsp. aureofaciens O6(GCA_000264555.1)	20	100.0					hypothetical protein
1379	GCA_003851165.1_00806	Pseudomonas chlororaphis subsp. aurantiaca M12(GCA_003851165.1)	1	5.0					hypothetical protein
1380	GCA_000264555.1_04636	Pseudomonas chlororaphis subsp. aureofaciens O6(GCA_000264555.1)	20	100.0					hypothetical protein
1381	GCA_003851205.1_01840	Pseudomonas chlororaphis subsp. aurantiaca 449(GCA_003851205.1)	1	5.0	K:ENOG410XWJ6				hypothetical protein
1382	GCA_003850365.1_02319	Pseudomonas chlororaphis subsp. piscium ATCC 17809(GCA_003850365.1)	4	20.0	S:ENOG410Y23V				hypothetical protein
1383	GCA_000963835.1_00589	CP010892_s PCL1606(GCA_000963835.1)	6	30.0	S:ENOG41128WU				hypothetical protein
1384	GCA_000264555.1_01666	Pseudomonas chlororaphis subsp. aureofaciens O6(GCA_000264555.1)	20	100.0	O:COG3526	K07401			selenoprotein W-related protein
1385	GCA_003851785.1_00229	Pseudomonas chlororaphis subsp. aureofaciens Pb-St2(GCA_003851785.1)	1	5.0	K:COG2732	K03623		GO:0005737	Barstar	Cytoplasm.	Inhibitor of the ribonuclease barnase. Forms a one-to- one non-covalent complex. Belongs to the barstar family.
1386	GCA_003850365.1_02663	Pseudomonas chlororaphis subsp. piscium ATCC 17809(GCA_003850365.1)	1	5.0	E:COG1280	K05834		GO:0016021,GO:0005886,GO:0006865	Homoserine/homoserine lactone efflux protein	Cell membrane
1387	GCA_003851835.1_03908	Pseudomonas chlororaphis subsp. aurantiaca DSM 19603(Type)(GCA_003851835.1)	1	5.0	K:COG2508	K09684			hypothetical protein
1388	GCA_003851925.1_05634	Pseudomonas chlororaphis subsp. aureofaciens ChPhzTR39(GCA_003851925.1)	1	5.0	K:COG1396				hypothetical protein
1389	GCA_003850465.1_00674	Pseudomonas chlororaphis subsp. piscium PCL1607(GCA_003850465.1)	2	10.0	S:ENOG4111IRD				hypothetical protein
1390	GCA_003850565.1_03050	CP027706_s CMR12a(GCA_003850565.1)	1	5.0					hypothetical protein
1391	GCA_003851165.1_01880	Pseudomonas chlororaphis subsp. aurantiaca M12(GCA_003851165.1)	1	5.0					hypothetical protein
1392	GCA_000698865.1_00257	Pseudomonas chlororaphis subsp. aureofaciens PA23(GCA_000698865.1)	5	25.0	G:ENOG410XP7I				hypothetical protein
1393	GCA_000264555.1_02679	Pseudomonas chlororaphis subsp. aureofaciens O6(GCA_000264555.1)	12	60.0	S:COG4260	K01090			Protein-serine/threonine phosphatase		KEGG: syj:D082_28070 protein phosphatase
1394	GCA_000264555.1_02310	Pseudomonas chlororaphis subsp. aureofaciens O6(GCA_000264555.1)	20	100.0	K:COG3636			GO:0043565	Uncharacterized protein HI_1420
1395	GCA_000264555.1_00087	Pseudomonas chlororaphis subsp. aureofaciens O6(GCA_000264555.1)	14	70.0	C:COG3245	K00406	Respiration Electron accepting reactions Terminal_cytochrome_C_oxidases Cytochrome c oxidase subunit CcoP (EC 1.9.3.1)	GO:0009055,GO:0020037,GO:0005506,GO:0055114,GO:0015979	Cytochrome c-555	Electron transport
1396	GCA_000264555.1_05163	Pseudomonas chlororaphis subsp. aureofaciens O6(GCA_000264555.1)	20	100.0					hypothetical protein
1397	GCA_001921865.1_02316	MSCT_s PCL1601(GCA_001921865.1)	2	10.0					hypothetical protein
1398	GCA_000264555.1_03563	Pseudomonas chlororaphis subsp. aureofaciens O6(GCA_000264555.1)	1	5.0					hypothetical protein
1399	GCA_000264555.1_05413	Pseudomonas chlororaphis subsp. aureofaciens O6(GCA_000264555.1)	11	55.0	S:COG3093	K21498	Regulation and Cell signaling Programmed Cell Death and Toxin-antitoxin Systems Toxin-antitoxin_systems_(other_than_RelBE_and_MazEF) HigA protein (antitoxin to HigB)	GO:0043565,GO:0006355,GO:0006351	Uncharacterized HTH-type transcriptional regulator Synpcc7942_2319	DNA-binding
1400	GCA_000264555.1_03600	Pseudomonas chlororaphis subsp. aureofaciens O6(GCA_000264555.1)	15	75.0	S:ENOG410Y38J				hypothetical protein
1401	GCA_003850365.1_03799	Pseudomonas chlororaphis subsp. piscium ATCC 17809(GCA_003850365.1)	2	10.0					hypothetical protein
1402	GCA_000264555.1_05845	Pseudomonas chlororaphis subsp. aureofaciens O6(GCA_000264555.1)	19	95.0	S:COG1872	K09131	Clustering-based subsystems null CBSS-630.2.peg.3360 UPF0235 protein VC0458		UPF0235 protein Avin_03050		Belongs to the UPF0235 family.
1403	GCA_003851495.1_03784	Pseudomonas synxantha 2-79(GCA_003851495.1)	1	5.0					hypothetical protein
1404	GCA_000264555.1_00011	Pseudomonas chlororaphis subsp. aureofaciens O6(GCA_000264555.1)	18	90.0					hypothetical protein
1405	GCA_000264555.1_04167	Pseudomonas chlororaphis subsp. aureofaciens O6(GCA_000264555.1)	20	100.0	Q:COG4829	K03464	Metabolism of Aromatic Compounds Peripheral pathways for catabolism of aromatic compounds Benzoate_catabolism Muconolactone isomerase (EC 5.3.3.4)	GO:0016159,GO:0042952	Muconolactone Delta-isomerase	Aromatic hydrocarbons catabolism
1406	GCA_003850565.1_01379	CP027706_s CMR12a(GCA_003850565.1)	1	5.0	S:ENOG411204V				hypothetical protein
1407	GCA_000698865.1_02616	Pseudomonas chlororaphis subsp. aureofaciens PA23(GCA_000698865.1)	3	15.0	S:ENOG410XRNE				hypothetical protein
1408	GCA_003851345.1_02234	Pseudomonas chlororaphis subsp. aurantiaca Q16(GCA_003851345.1)	1	5.0	S:ENOG410Y57W				hypothetical protein
1409	GCA_000698865.1_04787	Pseudomonas chlororaphis subsp. aureofaciens PA23(GCA_000698865.1)	5	25.0	K:ENOG4112ACI	K07746			antitoxin ParD1/3/4
1410	GCA_000264555.1_04909	Pseudomonas chlororaphis subsp. aureofaciens O6(GCA_000264555.1)	19	95.0					hypothetical protein
1411	GCA_003851495.1_02869	Pseudomonas synxantha 2-79(GCA_003851495.1)	1	5.0					hypothetical protein
1412	GCA_000963835.1_00478	CP010892_s PCL1606(GCA_000963835.1)	1	5.0	S:COG1359				hypothetical protein
1413	GCA_000264555.1_00672	Pseudomonas chlororaphis subsp. aureofaciens O6(GCA_000264555.1)	20	100.0	S:ENOG41129XW				hypothetical protein
1414	GCA_000698865.1_05436	Pseudomonas chlororaphis subsp. aureofaciens PA23(GCA_000698865.1)	1	5.0	S:ENOG410XP4A				hypothetical protein
1415	GCA_003850585.1_00797	Pseudomonas chlororaphis subsp. piscium ToZa7(GCA_003850585.1)	2	10.0	S:COG1937	K07807	Virulence, Disease and Defense Resistance to antibiotics and toxic compounds Cobalt-zinc-cadmium_resistance Cobalt-zinc-cadmium resistance protein CzcD	GO:0005737,GO:0003677,GO:0046872,GO:0045892,GO:0046688,GO:0006351	Copper-sensing transcriptional repressor RicR	Acetylation
1416	GCA_000698865.1_03017	Pseudomonas chlororaphis subsp. aureofaciens PA23(GCA_000698865.1)	4	20.0	S:ENOG4112650			GO:0030430	Uncharacterized protein gp26	Host cytoplasm
1417	GCA_003851925.1_02645	Pseudomonas chlororaphis subsp. aureofaciens ChPhzTR39(GCA_003851925.1)	1	5.0	P:ENOG410XPHF	K07798	Virulence, Disease and Defense Resistance to antibiotics and toxic compounds Cobalt-zinc-cadmium_resistance Cobalt/zinc/cadmium efflux RND transporter, membrane fusion protein, CzcB family	GO:0016020,GO:0006825,GO:0055085	Cation efflux system protein CusB	Copper
1418	GCA_000264555.1_00708	Pseudomonas chlororaphis subsp. aureofaciens O6(GCA_000264555.1)	20	100.0	S:COG1359			GO:0004497,GO:0019439,GO:0009636	Putative monooxygenase YcnE	Aromatic hydrocarbons catabolism
1419	GCA_000281915.1_00939	Pseudomonas chlororaphis subsp. chlororaphis 30-84(GCA_000281915.1)	6	30.0					hypothetical protein
1420	GCA_000264555.1_04886	Pseudomonas chlororaphis subsp. aureofaciens O6(GCA_000264555.1)	20	100.0	O:COG0234	K04078	Protein Metabolism Protein folding GroEL_GroES Heat shock protein 60 family co-chaperone GroES	GO:0005737,GO:0005524,GO:0006457	10 kDa chaperonin 1	Chaperone
1421	GCA_000264555.1_02882	Pseudomonas chlororaphis subsp. aureofaciens O6(GCA_000264555.1)	20	100.0					hypothetical protein
1422	GCA_003850565.1_00214	CP027706_s CMR12a(GCA_003850565.1)	1	5.0	S:ENOG410Z5YS				hypothetical protein
1423	GCA_000963835.1_01264	CP010892_s PCL1606(GCA_000963835.1)	1	5.0					hypothetical protein
1424	GCA_000963835.1_05847	CP010892_s PCL1606(GCA_000963835.1)	1	5.0	S:ENOG410XQTW	K12549	Motility and Chemotaxis Flagellar motility in Prokaryota Flagellum Flagellar hook-length control protein FliK		surface adhesion protein
1425	GCA_000264555.1_02397	Pseudomonas chlororaphis subsp. aureofaciens O6(GCA_000264555.1)	19	95.0	S:ENOG410XVUA				hypothetical protein
1426	GCA_000264555.1_02311	Pseudomonas chlororaphis subsp. aureofaciens O6(GCA_000264555.1)	19	95.0	S:COG3657				Uncharacterized protein HI_1419
1427	GCA_000698865.1_03387	Pseudomonas chlororaphis subsp. aureofaciens PA23(GCA_000698865.1)	5	25.0					hypothetical protein
1428	GCA_000264555.1_04396	Pseudomonas chlororaphis subsp. aureofaciens O6(GCA_000264555.1)	20	100.0					hypothetical protein
1429	GCA_003851165.1_01876	Pseudomonas chlororaphis subsp. aurantiaca M12(GCA_003851165.1)	1	5.0					hypothetical protein
1430	GCA_003850565.1_05353	CP027706_s CMR12a(GCA_003850565.1)	4	20.0	L:COG2963	K07483			hypothetical protein
1431	GCA_000264555.1_04962	Pseudomonas chlororaphis subsp. aureofaciens O6(GCA_000264555.1)	20	100.0					hypothetical protein
1432	GCA_003851495.1_04693	Pseudomonas synxantha 2-79(GCA_003851495.1)	1	5.0					hypothetical protein
1433	GCA_000963835.1_00610	CP010892_s PCL1606(GCA_000963835.1)	4	20.0					hypothetical protein
1434	GCA_000963835.1_00608	CP010892_s PCL1606(GCA_000963835.1)	5	25.0					hypothetical protein
1435	GCA_000264555.1_01574	Pseudomonas chlororaphis subsp. aureofaciens O6(GCA_000264555.1)	20	100.0	S:COG3100	K09902	Clustering-based subsystems null CBSS-243277.1.peg.4359 Protein YcgL		YcgL domain-containing protein PA1295		Contains 1 YcgL domain.
1436	GCA_000264555.1_05780	Pseudomonas chlororaphis subsp. aureofaciens O6(GCA_000264555.1)	20	100.0	S:COG4519				hypothetical protein
1437	GCA_003851265.1_03423	Pseudomonas chlororaphis subsp. aurantiaca M71(GCA_003851265.1)	3	15.0	L:ENOG410ZZRM				hypothetical protein
1438	GCA_000264555.1_06000	Pseudomonas chlororaphis subsp. aureofaciens O6(GCA_000264555.1)	20	100.0	S:ENOG410Y4FX				hypothetical protein
1439	GCA_000698865.1_04771	Pseudomonas chlororaphis subsp. aureofaciens PA23(GCA_000698865.1)	4	20.0					hypothetical protein
1440	GCA_003851205.1_00430	Pseudomonas chlororaphis subsp. aurantiaca 449(GCA_003851205.1)	1	5.0					hypothetical protein
1441	GCA_003850365.1_03491	Pseudomonas chlororaphis subsp. piscium ATCC 17809(GCA_003850365.1)	1	5.0	I:COG1024	K01692	Carbohydrates Fermentation Butanol_Biosynthesis Enoyl-CoA hydratase (EC 4.2.1.17)		Enoyl-CoA hydratase		KEGG: msa:Mycsm_05147 enoyl-CoA hydratase
1442	GCA_003851905.1_03583	Pseudomonas chlororaphis subsp. aureofaciens DSM 6698(Type)(GCA_003851905.1)	1	5.0					hypothetical protein
1443	GCA_000264555.1_00952	Pseudomonas chlororaphis subsp. aureofaciens O6(GCA_000264555.1)	20	100.0	S:COG3492	K09948	Clustering-based subsystems Pyruvate kinase associated cluster CBSS-288000.5.peg.1793 protein of unknown function DUF1244		uncharacterized protein
1444	GCA_000264555.1_05213	Pseudomonas chlororaphis subsp. aureofaciens O6(GCA_000264555.1)	11	55.0	S:ENOG411244G				hypothetical protein
1445	GCA_000264555.1_00849	Pseudomonas chlororaphis subsp. aureofaciens O6(GCA_000264555.1)	20	100.0					hypothetical protein
1446	GCA_003851925.1_04867	Pseudomonas chlororaphis subsp. aureofaciens ChPhzTR39(GCA_003851925.1)	1	5.0	V:COG1566	K15549	Virulence, Disease and Defense Resistance to antibiotics and toxic compounds Cobalt-zinc-cadmium_resistance Probable Co/Zn/Cd efflux system membrane fusion protein	GO:0016021,GO:0015238,GO:0046942,GO:0006855,GO:0055085	uncharacterized protein	Membrane
1447	GCA_000264555.1_04971	Pseudomonas chlororaphis subsp. aureofaciens O6(GCA_000264555.1)	19	95.0	G:COG1263	K02803|K02804	Carbohydrates Aminosugars Chitin_and_N-acetylglucosamine_utilization PTS system, N-acetylglucosamine-specific IIA component (EC 2.7.1.69)		Protein-N(pi)-phosphohistidine--N-acetyl-D-glucosaminephosphotransferase		KEGG: hel:HELO_3099 PTS system, N-acetylglucosamine-specific IIB component
1448	GCA_003850365.1_03690	Pseudomonas chlororaphis subsp. piscium ATCC 17809(GCA_003850365.1)	1	5.0					hypothetical protein
1449	GCA_003851205.1_01938	Pseudomonas chlororaphis subsp. aurantiaca 449(GCA_003851205.1)	4	20.0	S:ENOG410YNZK				hypothetical protein
1450	GCA_001921865.1_05819	MSCT_s PCL1601(GCA_001921865.1)	1	5.0					hypothetical protein
1451	GCA_003851495.1_02945	Pseudomonas synxantha 2-79(GCA_003851495.1)	1	5.0					hypothetical protein
1452	GCA_003851495.1_02632	Pseudomonas synxantha 2-79(GCA_003851495.1)	1	5.0	K:ENOG410XPGX	K07506	Cell Wall and Capsule Gram-Negative cell wall components Lipoprotein_sorting_system Outer membrane lipoprotein carrier protein LolA	GO:0005829,GO:0000987,GO:0003700,GO:0043902,GO:0009372,GO:0006355,GO:0006351	HTH-type transcriptional regulator VqsM	Activator
1453	GCA_003850565.1_04888	CP027706_s CMR12a(GCA_003850565.1)	1	5.0	S:COG1359	K11530	Regulation and Cell signaling Quorum sensing and biofilm formation Autoinducer_2_(AI-2)_transport_and_processing_(lsrACDBFGE_operon) Autoinducer 2 (AI-2) modifying protein LsrG	GO:0005737	(4S)-4-hydroxy-5-phosphonooxypentane-2,3-dione isomerase	Cytoplasm.	Involved in the degradation of phospho-AI-2, thereby terminating induction of the lsr operon and closing the AI-2 signaling cycle. Catalyzes the cleavage of phosphorylated 4,5- dihydroxy-2,3-pentanedione (P-DPD) to 2-phosphoglycolic acid (PG) and another three-carbon compound (By similarity)
1454	GCA_000264555.1_05702	Pseudomonas chlororaphis subsp. aureofaciens O6(GCA_000264555.1)	20	100.0	S:ENOG410XW7J				hypothetical protein
1455	GCA_003851905.1_03732	Pseudomonas chlororaphis subsp. aureofaciens DSM 6698(Type)(GCA_003851905.1)	2	10.0					hypothetical protein
1456	GCA_000264555.1_01256	Pseudomonas chlororaphis subsp. aureofaciens O6(GCA_000264555.1)	1	5.0					hypothetical protein
1457	GCA_000698865.1_00680	Pseudomonas chlororaphis subsp. aureofaciens PA23(GCA_000698865.1)	4	20.0	L:COG2963	K07483		GO:0003677,GO:0004803,GO:0006313	Insertion element IS629 uncharacterized 12 kDa protein S4062	Transposable element.	Belongs to the transposase 8 family.
1458	GCA_000264555.1_04252	Pseudomonas chlororaphis subsp. aureofaciens O6(GCA_000264555.1)	19	95.0	K:ENOG41122X0	K03892			ArsR family transcriptional regulator
1459	GCA_000264555.1_01285	Pseudomonas chlororaphis subsp. aureofaciens O6(GCA_000264555.1)	19	95.0	S:ENOG410XY1Q				hypothetical protein
1460	GCA_000264555.1_00490	Pseudomonas chlororaphis subsp. aureofaciens O6(GCA_000264555.1)	20	100.0	S:COG4680	K19166			mRNA interferase HigB		KEGG: pfs:PFLU_0442 mRNA interferase HigB
1461	GCA_000264555.1_01232	Pseudomonas chlororaphis subsp. aureofaciens O6(GCA_000264555.1)	5	25.0					hypothetical protein
1462	GCA_000264555.1_04429	Pseudomonas chlororaphis subsp. aureofaciens O6(GCA_000264555.1)	19	95.0	L:COG0776	K05788	DNA Metabolism null DNA_structural_proteins,_bacterial Integration host factor beta subunit	GO:0005694,GO:0003677,GO:0006310,GO:0006355,GO:0006417,GO:0006351	Integration host factor subunit beta	DNA recombination
1463	GCA_000264555.1_02719	Pseudomonas chlororaphis subsp. aureofaciens O6(GCA_000264555.1)	17	85.0					hypothetical protein
1464	GCA_000264555.1_02514	Pseudomonas chlororaphis subsp. aureofaciens O6(GCA_000264555.1)	19	95.0	S:ENOG41123WZ				hypothetical protein
1465	GCA_000264555.1_04945	Pseudomonas chlororaphis subsp. aureofaciens O6(GCA_000264555.1)	17	85.0	G:COG0662				hypothetical protein
1466	GCA_003850565.1_00998	CP027706_s CMR12a(GCA_003850565.1)	4	20.0	K:ENOG410XW3R	K07154			Non-specific serine/threonine protein kinase		KEGG: def:CNY67_13080 serine/threonine-protein kinase HipA
1467	GCA_003850365.1_01474	Pseudomonas chlororaphis subsp. piscium ATCC 17809(GCA_003850365.1)	11	55.0	S:ENOG410Y08B				hypothetical protein
1468	GCA_003850565.1_02237	CP027706_s CMR12a(GCA_003850565.1)	1	5.0	S:ENOG4111U95				hypothetical protein
1469	GCA_000264555.1_01725	Pseudomonas chlororaphis subsp. aureofaciens O6(GCA_000264555.1)	20	100.0	S:ENOG410Z51Y				hypothetical protein
1470	GCA_000264555.1_02265	Pseudomonas chlororaphis subsp. aureofaciens O6(GCA_000264555.1)	6	30.0					hypothetical protein
1471	GCA_000698865.1_04733	Pseudomonas chlororaphis subsp. aureofaciens PA23(GCA_000698865.1)	1	5.0					hypothetical protein
1472	GCA_000698865.1_01249	Pseudomonas chlororaphis subsp. aureofaciens PA23(GCA_000698865.1)	8	40.0	S:COG3668	K19092	Regulation and Cell signaling Programmed Cell Death and Toxin-antitoxin Systems Phd-Doc,_YdcE-YdcD_toxin-antitoxin_(programmed_cell_death)_systems Death on curing protein, Doc toxin		Putative toxin Y4kP	Plasmid
1473	GCA_000264555.1_05822	Pseudomonas chlororaphis subsp. aureofaciens O6(GCA_000264555.1)	20	100.0	I:ENOG41123U5	K13931	Carbohydrates Organic acids Malonate_decarboxylase Malonate decarboxylase delta subunit	GO:0005737,GO:0000036	Malonate decarboxylase acyl carrier protein	Cytoplasm
1474	GCA_003850565.1_03128	CP027706_s CMR12a(GCA_003850565.1)	1	5.0	S:ENOG410Z9GS				hypothetical protein
1475	GCA_003850565.1_05885	CP027706_s CMR12a(GCA_003850565.1)	1	5.0					hypothetical protein
1476	GCA_003850445.1_01350	Pseudomonas chlororaphis subsp. piscium PCL1391(GCA_003850445.1)	3	15.0	S:ENOG410ZZF8				hypothetical protein
1477	GCA_000264555.1_01679	Pseudomonas chlororaphis subsp. aureofaciens O6(GCA_000264555.1)	20	100.0	S:COG2350	K09780	Miscellaneous null Broadly_distributed_proteins_not_in_subsystems YciL protein		Protein YciI		Belongs to the YciI family.
1478	GCA_000264555.1_02085	Pseudomonas chlororaphis subsp. aureofaciens O6(GCA_000264555.1)	20	100.0	S:ENOG410XUDD				hypothetical protein
1479	GCA_003850565.1_00615	CP027706_s CMR12a(GCA_003850565.1)	1	5.0	S:ENOG41126HC				uncharacterized protein		To U.parvum UU089.1.
1480	GCA_000264555.1_01243	Pseudomonas chlororaphis subsp. aureofaciens O6(GCA_000264555.1)	1	5.0	S:ENOG410XYQK				hypothetical protein
1481	GCA_000281915.1_03308	Pseudomonas chlororaphis subsp. chlororaphis 30-84(GCA_000281915.1)	2	10.0					hypothetical protein
1482	GCA_003850565.1_01875	CP027706_s CMR12a(GCA_003850565.1)	1	5.0					hypothetical protein
1483	GCA_003850565.1_03127	CP027706_s CMR12a(GCA_003850565.1)	1	5.0	S:ENOG410Z9GS				hypothetical protein
1484	GCA_000264555.1_01213	Pseudomonas chlororaphis subsp. aureofaciens O6(GCA_000264555.1)	1	5.0					hypothetical protein
1485	GCA_003851495.1_03789	Pseudomonas synxantha 2-79(GCA_003851495.1)	1	5.0					hypothetical protein
1486	GCA_000264555.1_03969	Pseudomonas chlororaphis subsp. aureofaciens O6(GCA_000264555.1)	20	100.0	S:ENOG410XVHW	K07237	RNA Metabolism RNA processing and modification tRNA_modification_Bacteria tRNA 5-methylaminomethyl-2-thiouridine synthase TusB		tRNA 2-thiouridine synthesizing protein B
1487	GCA_000264555.1_03233	Pseudomonas chlororaphis subsp. aureofaciens O6(GCA_000264555.1)	12	60.0	S:ENOG41121WG				hypothetical protein
1488	GCA_001921865.1_00189	MSCT_s PCL1601(GCA_001921865.1)	1	5.0					hypothetical protein
1489	GCA_000281915.1_00943	Pseudomonas chlororaphis subsp. chlororaphis 30-84(GCA_000281915.1)	1	5.0					hypothetical protein
1490	GCA_000264555.1_02255	Pseudomonas chlororaphis subsp. aureofaciens O6(GCA_000264555.1)	20	100.0					hypothetical protein
1491	GCA_000264555.1_05603	Pseudomonas chlororaphis subsp. aureofaciens O6(GCA_000264555.1)	20	100.0	J:COG0089	K02892	Protein Metabolism Protein biosynthesis Ribosome_LSU_bacterial LSU ribosomal protein L23p (L23Ae)	GO:0005840,GO:0000166,GO:0019843,GO:0003735,GO:0006412	50S ribosomal protein L23	Ribonucleoprotein
1492	GCA_003851925.1_02074	Pseudomonas chlororaphis subsp. aureofaciens ChPhzTR39(GCA_003851925.1)	1	5.0					hypothetical protein
1493	GCA_000264555.1_04449	Pseudomonas chlororaphis subsp. aureofaciens O6(GCA_000264555.1)	20	100.0	T:COG0271	K05527	Clustering-based subsystems null Bacterial_Cell_Division Cell division protein BolA		BolA protein
1494	GCA_003851495.1_02985	Pseudomonas synxantha 2-79(GCA_003851495.1)	1	5.0					hypothetical protein
1495	GCA_003851265.1_00347	Pseudomonas chlororaphis subsp. aurantiaca M71(GCA_003851265.1)	1	5.0	S:ENOG410XZRU				hypothetical protein
1496	GCA_000264555.1_00616	Pseudomonas chlororaphis subsp. aureofaciens O6(GCA_000264555.1)	20	100.0	S:ENOG41121V4				Phosphate starvation-inducible protein PsiF	Signal.
1497	GCA_000963835.1_00488	CP010892_s PCL1606(GCA_000963835.1)	1	5.0	S:ENOG41121K7	K20530			type IV secretion system protein VirB4
1498	GCA_003850565.1_05162	CP027706_s CMR12a(GCA_003850565.1)	1	5.0					hypothetical protein
1499	GCA_000281915.1_03078	Pseudomonas chlororaphis subsp. chlororaphis 30-84(GCA_000281915.1)	3	15.0					hypothetical protein
1500	GCA_003851495.1_02228	Pseudomonas synxantha 2-79(GCA_003851495.1)	1	5.0	K:COG0640			GO:0003677,GO:0003700,GO:0006351	Uncharacterized HTH-type transcriptional regulator YczG	DNA-binding
1501	GCA_003851495.1_01518	Pseudomonas synxantha 2-79(GCA_003851495.1)	1	5.0	S:COG3668	K19092			hypothetical protein
1502	GCA_003851495.1_02013	Pseudomonas synxantha 2-79(GCA_003851495.1)	1	5.0	S:ENOG410Y5XK				hypothetical protein
1503	GCA_003851495.1_02416	Pseudomonas synxantha 2-79(GCA_003851495.1)	1	5.0					hypothetical protein
1504	GCA_000264555.1_05534	Pseudomonas chlororaphis subsp. aureofaciens O6(GCA_000264555.1)	18	90.0	K:COG0640	K03892		GO:0003677,GO:0003700,GO:0006351	Uncharacterized HTH-type transcriptional regulator YbzH	DNA-binding
1505	GCA_003851165.1_04742	Pseudomonas chlororaphis subsp. aurantiaca M12(GCA_003851165.1)	3	15.0					hypothetical protein
1506	GCA_000281915.1_03165	Pseudomonas chlororaphis subsp. chlororaphis 30-84(GCA_000281915.1)	7	35.0					hypothetical protein
1507	GCA_000698865.1_03006	Pseudomonas chlororaphis subsp. aureofaciens PA23(GCA_000698865.1)	4	20.0	S:ENOG41129YN		Metabolism of Aromatic Compounds Metabolism of central aromatic intermediates Homogentisate_pathway_of_aromatic_compound_degradation Transcriptional regulator, IclR family		hypothetical protein
1508	GCA_003850365.1_05333	Pseudomonas chlororaphis subsp. piscium ATCC 17809(GCA_003850365.1)	1	5.0	L:COG3436				hypothetical protein
1509	GCA_003851785.1_03187	Pseudomonas chlororaphis subsp. aureofaciens Pb-St2(GCA_003851785.1)	1	5.0					hypothetical protein
1510	GCA_003850365.1_03769	Pseudomonas chlororaphis subsp. piscium ATCC 17809(GCA_003850365.1)	2	10.0	K:ENOG410XUC3				hypothetical protein
1511	GCA_003851835.1_03101	Pseudomonas chlororaphis subsp. aurantiaca DSM 19603(Type)(GCA_003851835.1)	1	5.0	M:COG3952	K07264	Cell Wall and Capsule Gram-Negative cell wall components KDO2-Lipid_A_biosynthesis Lipid-A-disaccharide synthase (EC 2.4.1.182)	GO:0008915,GO:0009245	Lipid IV(A) 4-amino-4-deoxy-L-arabinosyltransferase	Glycosyltransferase
1512	GCA_000264555.1_02262	Pseudomonas chlororaphis subsp. aureofaciens O6(GCA_000264555.1)	20	100.0	L:COG0776	K04764	DNA Metabolism null DNA_structural_proteins,_bacterial Integration host factor alpha subunit	GO:0003677,GO:0006310,GO:0006355,GO:0006417,GO:0006351	Integration host factor subunit alpha	DNA recombination
1513	GCA_000264555.1_00497	Pseudomonas chlororaphis subsp. aureofaciens O6(GCA_000264555.1)	20	100.0	S:COG3027	K09888			cell division protein ZapA
1514	GCA_000963835.1_03489	CP010892_s PCL1606(GCA_000963835.1)	1	5.0	L:COG1961				hypothetical protein
1515	GCA_003850445.1_02149	Pseudomonas chlororaphis subsp. piscium PCL1391(GCA_003850445.1)	3	15.0	E:COG4541				hypothetical protein
1516	GCA_003850565.1_02662	CP027706_s CMR12a(GCA_003850565.1)	1	5.0	S:ENOG410ZXEH				hypothetical protein
1517	GCA_000264555.1_02435	Pseudomonas chlororaphis subsp. aureofaciens O6(GCA_000264555.1)	19	95.0	S:ENOG410YMEE				hypothetical protein
1518	GCA_003851495.1_00191	Pseudomonas synxantha 2-79(GCA_003851495.1)	1	5.0					hypothetical protein
1519	GCA_000963835.1_03740	CP010892_s PCL1606(GCA_000963835.1)	1	5.0					hypothetical protein
1520	GCA_000264555.1_05380	Pseudomonas chlororaphis subsp. aureofaciens O6(GCA_000264555.1)	19	95.0					hypothetical protein
1521	GCA_000264555.1_03533	Pseudomonas chlororaphis subsp. aureofaciens O6(GCA_000264555.1)	20	100.0	S:ENOG410Y5TA				hypothetical protein
1522	GCA_000698865.1_04773	Pseudomonas chlororaphis subsp. aureofaciens PA23(GCA_000698865.1)	1	5.0					hypothetical protein
1523	GCA_003850365.1_01197	Pseudomonas chlororaphis subsp. piscium ATCC 17809(GCA_003850365.1)	6	30.0	S:ENOG410Z7GQ				hypothetical protein
1524	GCA_003851495.1_03438	Pseudomonas synxantha 2-79(GCA_003851495.1)	1	5.0					hypothetical protein
1525	GCA_003850365.1_03670	Pseudomonas chlororaphis subsp. piscium ATCC 17809(GCA_003850365.1)	1	5.0	S:ENOG410Y3PJ				hypothetical protein
1526	GCA_000264555.1_00674	Pseudomonas chlororaphis subsp. aureofaciens O6(GCA_000264555.1)	20	100.0	S:COG1694	K16904			dCTP diphosphatase		KEGG: pvu:PHAVU_003G187100g dCTP diphosphatase
1527	GCA_000264555.1_01142	Pseudomonas chlororaphis subsp. aureofaciens O6(GCA_000264555.1)	20	100.0					hypothetical protein
1528	GCA_000264555.1_00620	Pseudomonas chlororaphis subsp. aureofaciens O6(GCA_000264555.1)	19	95.0	S:ENOG411205W	K18997	Protein Metabolism Protein folding Protein_chaperones Chaperone-modulator protein CbpM		Chaperone modulatory protein CbpM		Interacts with CbpA and inhibits both the DnaJ-like co- chaperone activity and the DNA binding activity of CbpA. Together with CbpA, modulates the activity of the DnaK chaperone system. Does not inhibit the co-chaperone activity of DnaJ
1529	GCA_003851925.1_02494	Pseudomonas chlororaphis subsp. aureofaciens ChPhzTR39(GCA_003851925.1)	1	5.0					hypothetical protein
1530	GCA_000264555.1_05180	Pseudomonas chlororaphis subsp. aureofaciens O6(GCA_000264555.1)	20	100.0	S:ENOG4111UWX				hypothetical protein
1531	GCA_003850565.1_02265	CP027706_s CMR12a(GCA_003850565.1)	1	5.0					hypothetical protein
1532	GCA_003851495.1_02284	Pseudomonas synxantha 2-79(GCA_003851495.1)	1	5.0	K:ENOG4111WCX				hypothetical protein
1533	GCA_000264555.1_00626	Pseudomonas chlororaphis subsp. aureofaciens O6(GCA_000264555.1)	20	100.0	E:COG0831	K01430	Amino Acids and Derivatives Arginine
1534	GCA_000264555.1_01426	Pseudomonas chlororaphis subsp. aureofaciens O6(GCA_000264555.1)	20	100.0	S:COG4321				hypothetical protein
1535	GCA_000264555.1_01583	Pseudomonas chlororaphis subsp. aureofaciens O6(GCA_000264555.1)	20	100.0					hypothetical protein
1536	GCA_003850565.1_04999	CP027706_s CMR12a(GCA_003850565.1)	1	5.0	S:ENOG4111NIW				hypothetical protein
1537	GCA_003851495.1_02750	Pseudomonas synxantha 2-79(GCA_003851495.1)	1	5.0	C:COG1012	K00151	Amino Acids and Derivatives Aromatic amino acids and derivatives Aromatic_amino_acid_degradation 5-carboxymethyl-2-hydroxymuconate semialdehyde dehydrogenase (EC 1.2.1.60)	GO:0009507,GO:0005759,GO:0005739,GO:0004029,GO:0005524,GO:0046686	5-carboxymethyl-2-hydroxymuconic-semialdehyde dehydrogenase	Mitochondrion
1538	GCA_000264555.1_00922	Pseudomonas chlororaphis subsp. aureofaciens O6(GCA_000264555.1)	20	100.0	J:COG1544	K05808	Protein Metabolism Protein biosynthesis Ribosome_activity_modulation Ribosome hibernation protein YhbH	GO:0044238,GO:0006417	Ribosome hibernation promoting factor	Translation regulation.	During stationary phase, promotes and stabilizes dimerization of 70S ribosomes, leading to the formation of inactive 100S ribosomes
1539	GCA_003851495.1_03811	Pseudomonas synxantha 2-79(GCA_003851495.1)	1	5.0					hypothetical protein
1540	GCA_000264555.1_00994	Pseudomonas chlororaphis subsp. aureofaciens O6(GCA_000264555.1)	19	95.0	S:ENOG410XUR6				hypothetical protein
1541	GCA_003850565.1_04906	CP027706_s CMR12a(GCA_003850565.1)	1	5.0	I:COG1024	K01715	Carbohydrates Fermentation Butanol_Biosynthesis Enoyl-CoA hydratase (EC 4.2.1.17)		Enoyl-CoA hydratase		KEGG: tje:TJEJU_4011 enoyl-CoA hydratase
1542	GCA_003851905.1_03580	Pseudomonas chlororaphis subsp. aureofaciens DSM 6698(Type)(GCA_003851905.1)	1	5.0					hypothetical protein
1543	GCA_003850565.1_01192	CP027706_s CMR12a(GCA_003850565.1)	1	5.0	S:ENOG410Y08B				hypothetical protein
1544	GCA_003851495.1_03758	Pseudomonas synxantha 2-79(GCA_003851495.1)	1	5.0	S:ENOG410Y8N7				hypothetical protein
1545	GCA_000698865.1_03016	Pseudomonas chlororaphis subsp. aureofaciens PA23(GCA_000698865.1)	4	20.0					hypothetical protein
1546	GCA_003851495.1_04202	Pseudomonas synxantha 2-79(GCA_003851495.1)	1	5.0					hypothetical protein
1547	GCA_000264555.1_01735	Pseudomonas chlororaphis subsp. aureofaciens O6(GCA_000264555.1)	20	100.0	T:COG1366	K20978	Stress Response null SigmaB_stress_responce_regulation anti sigma b factor antagonist RsbV	GO:0005576	STAS-domain containing protein PA14_20770	Secreted.	Contains 1 STAS domain.
1548	GCA_000264555.1_05592	Pseudomonas chlororaphis subsp. aureofaciens O6(GCA_000264555.1)	20	100.0	J:COG0199	K02954	Protein Metabolism Protein biosynthesis Ribosome_SSU_bacterial SSU ribosomal protein S14p (S29e)	GO:0005840,GO:0019843,GO:0003735,GO:0006412	30S ribosomal protein S14	Ribonucleoprotein
1549	GCA_000264555.1_01368	Pseudomonas chlororaphis subsp. aureofaciens O6(GCA_000264555.1)	20	100.0	S:COG5572				hypothetical protein
1550	GCA_000264555.1_01526	Pseudomonas chlororaphis subsp. aureofaciens O6(GCA_000264555.1)	3	15.0					hypothetical protein
1551	GCA_003851835.1_03429	Pseudomonas chlororaphis subsp. aurantiaca DSM 19603(Type)(GCA_003851835.1)	1	5.0	G:ENOG410XP7I	K08172	Amino Acids and Derivatives Proline and 4-hydroxyproline Proline,_4-hydroxyproline_uptake_and_utilization L-Proline/Glycine betaine transporter ProP	GO:0016021,GO:0005886,GO:0015293	Putative proline/betaine transporter	Cell membrane
1552	GCA_000264555.1_05024	Pseudomonas chlororaphis subsp. aureofaciens O6(GCA_000264555.1)	4	20.0					hypothetical protein
1553	GCA_000264555.1_00623	Pseudomonas chlororaphis subsp. aureofaciens O6(GCA_000264555.1)	20	100.0	E:COG0832	K01429	Amino Acids and Derivatives Arginine
1554	GCA_000264555.1_02252	Pseudomonas chlororaphis subsp. aureofaciens O6(GCA_000264555.1)	20	100.0					hypothetical protein
1555	GCA_003850585.1_04014	Pseudomonas chlororaphis subsp. piscium ToZa7(GCA_003850585.1)	2	10.0					hypothetical protein
1556	GCA_000963835.1_01491	CP010892_s PCL1606(GCA_000963835.1)	2	10.0					hypothetical protein
1557	GCA_000264555.1_02150	Pseudomonas chlororaphis subsp. aureofaciens O6(GCA_000264555.1)	1	5.0	S:ENOG410Z6U0				hypothetical protein
1558	GCA_003850565.1_05314	CP027706_s CMR12a(GCA_003850565.1)	1	5.0					hypothetical protein
1559	GCA_003851495.1_04236	Pseudomonas synxantha 2-79(GCA_003851495.1)	1	5.0	L:COG4584			GO:0003677,GO:0015074,GO:0006310,GO:0032196	Transposase for insertion sequences IS1326/IS1353	DNA recombination
1560	GCA_003851495.1_02194	Pseudomonas synxantha 2-79(GCA_003851495.1)	1	5.0					hypothetical protein
1561	GCA_000264555.1_00832	Pseudomonas chlororaphis subsp. aureofaciens O6(GCA_000264555.1)	20	100.0	J:COG1534	K07574	Miscellaneous Plant-Prokaryote DOE project Iojap FIG004454: RNA binding protein	GO:0003723	Probable RNA-binding protein PA4753	RNA-binding.	Contains 1 CRM domain.
1562	GCA_000264555.1_00113	Pseudomonas chlororaphis subsp. aureofaciens O6(GCA_000264555.1)	20	100.0	S:ENOG410ZV95		Iron acquisition and metabolism null Hemin_transport_system Outer membrane receptor proteins, mostly Fe transport		hypothetical protein
1563	GCA_000264555.1_00933	Pseudomonas chlororaphis subsp. aureofaciens O6(GCA_000264555.1)	20	100.0	S:ENOG410XZER	K07122			phospholipid transport system transporter-binding protein
1564	GCA_000264555.1_00612	Pseudomonas chlororaphis subsp. aureofaciens O6(GCA_000264555.1)	19	95.0	P:COG2076	K03297		GO:0016021,GO:0005886,GO:0006810	Quaternary ammonium compound-resistance protein QacC	Cell membrane
1565	GCA_003851495.1_04028	Pseudomonas synxantha 2-79(GCA_003851495.1)	1	5.0					hypothetical protein
1566	GCA_000698865.1_01951	Pseudomonas chlororaphis subsp. aureofaciens PA23(GCA_000698865.1)	2	10.0					hypothetical protein
1567	GCA_003851495.1_03659	Pseudomonas synxantha 2-79(GCA_003851495.1)	1	5.0	S:ENOG410ZAGR				hypothetical protein
1568	GCA_003851495.1_02033	Pseudomonas synxantha 2-79(GCA_003851495.1)	1	5.0	S:COG5455				hypothetical protein
1569	GCA_003850565.1_05599	CP027706_s CMR12a(GCA_003850565.1)	1	5.0					hypothetical protein
1570	GCA_003851835.1_03532	Pseudomonas chlororaphis subsp. aurantiaca DSM 19603(Type)(GCA_003851835.1)	1	5.0					hypothetical protein
1571	GCA_000264555.1_03034	Pseudomonas chlororaphis subsp. aureofaciens O6(GCA_000264555.1)	18	90.0	S:COG3162	K14393	Carbohydrates Central carbohydrate metabolism Pyruvate_metabolism_II:_acetyl-CoA,_acetogenesis_from_pyruvate Putative membrane protein, clustering with ActP		cation/acetate symporter
1572	GCA_003850465.1_00669	Pseudomonas chlororaphis subsp. piscium PCL1607(GCA_003850465.1)	2	10.0	S:ENOG4111VFF				hypothetical protein
1573	GCA_000698865.1_05446	Pseudomonas chlororaphis subsp. aureofaciens PA23(GCA_000698865.1)	6	30.0	L:COG2963	K07483		GO:0003677,GO:0004803,GO:0006313	Transposase InsN for insertion sequence element IS911A	DNA recombination
1574	GCA_003851495.1_04345	Pseudomonas synxantha 2-79(GCA_003851495.1)	1	5.0					hypothetical protein
1575	GCA_000264555.1_04103	Pseudomonas chlororaphis subsp. aureofaciens O6(GCA_000264555.1)	20	100.0	S:COG3212				Uncharacterized protein YkoJ	Signal.
1576	GCA_000264555.1_03348	Pseudomonas chlororaphis subsp. aureofaciens O6(GCA_000264555.1)	13	65.0	C:ENOG4111U0F				hypothetical protein
1577	GCA_000264555.1_01919	Pseudomonas chlororaphis subsp. aureofaciens O6(GCA_000264555.1)	13	65.0					hypothetical protein
1578	GCA_003851405.1_00796	Pseudomonas chlororaphis subsp. aureofaciens 66(GCA_003851405.1)	1	5.0					hypothetical protein
1579	GCA_003850565.1_02619	CP027706_s CMR12a(GCA_003850565.1)	1	5.0	S:ENOG410Z6P0				hypothetical protein
1580	GCA_000698865.1_04735	Pseudomonas chlororaphis subsp. aureofaciens PA23(GCA_000698865.1)	1	5.0	S:COG4104				hypothetical protein
1581	GCA_003851495.1_02880	Pseudomonas synxantha 2-79(GCA_003851495.1)	1	5.0	O:COG0278	K07390	Stress Response Oxidative stress Glutaredoxins Glutaredoxin-related protein	GO:0005737,GO:0005739,GO:0051537,GO:0009055,GO:0046872,GO:0015035,GO:0045454,GO:0030097,GO:0016226	Glutaredoxin-related protein 5, mitochondrial	2Fe-2S
1582	GCA_000698865.1_05469	Pseudomonas chlororaphis subsp. aureofaciens PA23(GCA_000698865.1)	2	10.0					hypothetical protein
1583	GCA_003851495.1_03579	Pseudomonas synxantha 2-79(GCA_003851495.1)	1	5.0					hypothetical protein
1584	GCA_003851495.1_04205	Pseudomonas synxantha 2-79(GCA_003851495.1)	1	5.0	K:COG1396				hypothetical protein
1585	GCA_000281915.1_03538	Pseudomonas chlororaphis subsp. chlororaphis 30-84(GCA_000281915.1)	13	65.0	S:ENOG41122TH				hypothetical protein
1586	GCA_003851835.1_03629	Pseudomonas chlororaphis subsp. aurantiaca DSM 19603(Type)(GCA_003851835.1)	2	10.0					hypothetical protein
1587	GCA_003850565.1_05579	CP027706_s CMR12a(GCA_003850565.1)	1	5.0					hypothetical protein
1588	GCA_000264555.1_01210	Pseudomonas chlororaphis subsp. aureofaciens O6(GCA_000264555.1)	20	100.0	S:COG4680	K19166			mRNA interferase HigB		KEGG: pcq:PcP3B5_17480 mRNA interferase HigB
1589	GCA_003851205.1_01936	Pseudomonas chlororaphis subsp. aurantiaca 449(GCA_003851205.1)	4	20.0	L:COG2801	K07497	Phages, Prophages, Transposable elements, Plasmids Transposable elements CBSS-203122.12.peg.188 Transposase OrfAB, subunit B	GO:0003677,GO:0015074,GO:0006310,GO:0032196	Transposase for insertion sequence element IS3411	DNA recombination
1590	GCA_003850565.1_05596	CP027706_s CMR12a(GCA_003850565.1)	1	5.0	S:ENOG410Y4G2	K07141			Molybdenum cofactor cytidylyltransferase		KEGG: bgp:BGL_2c08700 molybdenum cofactor cytidylyltransferase
1591	GCA_003851495.1_04953	Pseudomonas synxantha 2-79(GCA_003851495.1)	1	5.0	E:COG1605	K04782	Amino Acids and Derivatives Aromatic amino acids and derivatives Chorismate:_Intermediate_for_synthesis_of_PAPA_antibiotics,_PABA,_anthranilate,_3-hydroxyanthranilate_and_more. Isochorismate pyruvate-lyase (EC 4.-.-.-)		Isochorismate lyase		KEGG: ppu:PP_2170 isochorismate pyruvate lyase
1592	GCA_003851925.1_01548	Pseudomonas chlororaphis subsp. aureofaciens ChPhzTR39(GCA_003851925.1)	1	5.0					hypothetical protein
1593	GCA_000264555.1_01048	Pseudomonas chlororaphis subsp. aureofaciens O6(GCA_000264555.1)	19	95.0	S:ENOG4111YYW	K13651	Regulation and Cell signaling Programmed Cell Death and Toxin-antitoxin Systems Toxin-antitoxin_systems_(other_than_RelBE_and_MazEF) Toxin mRNA interferase YgiU	GO:0004521,GO:0045892,GO:0017148,GO:0009372,GO:2000145,GO:0043488,GO:0090502,GO:0044010,GO:0006351	mRNA interferase MqsR	Endonuclease
1594	GCA_000264555.1_01374	Pseudomonas chlororaphis subsp. aureofaciens O6(GCA_000264555.1)	20	100.0	S:COG5626				hypothetical protein
1595	GCA_003850565.1_02121	CP027706_s CMR12a(GCA_003850565.1)	1	5.0					hypothetical protein
1596	GCA_003851835.1_00238	Pseudomonas chlororaphis subsp. aurantiaca DSM 19603(Type)(GCA_003851835.1)	1	5.0					hypothetical protein
1597	GCA_000264555.1_00203	Pseudomonas chlororaphis subsp. aureofaciens O6(GCA_000264555.1)	20	100.0	S:ENOG41128YJ				hypothetical protein
1598	GCA_000264555.1_02253	Pseudomonas chlororaphis subsp. aureofaciens O6(GCA_000264555.1)	20	100.0	S:ENOG410XX2P				hypothetical protein
1599	GCA_000264555.1_01806	Pseudomonas chlororaphis subsp. aureofaciens O6(GCA_000264555.1)	20	100.0	S:COG3162	K14393	Carbohydrates Central carbohydrate metabolism Pyruvate_metabolism_II:_acetyl-CoA,_acetogenesis_from_pyruvate Putative membrane protein, clustering with ActP	GO:0016021,GO:0005886	Inner membrane protein YjcH	Cell inner membrane
1600	GCA_003851495.1_01459	Pseudomonas synxantha 2-79(GCA_003851495.1)	1	5.0					hypothetical protein
1601	GCA_000264555.1_00160	Pseudomonas chlororaphis subsp. aureofaciens O6(GCA_000264555.1)	17	85.0					hypothetical protein
1602	GCA_003850365.1_06347	Pseudomonas chlororaphis subsp. piscium ATCC 17809(GCA_003850365.1)	6	30.0					hypothetical protein
1603	GCA_003851265.1_00350	Pseudomonas chlororaphis subsp. aurantiaca M71(GCA_003851265.1)	1	5.0					hypothetical protein
1604	GCA_003851495.1_05364	Pseudomonas synxantha 2-79(GCA_003851495.1)	1	5.0					hypothetical protein
1605	GCA_003850365.1_00226	Pseudomonas chlororaphis subsp. piscium ATCC 17809(GCA_003850365.1)	1	5.0					hypothetical protein
1606	GCA_003850565.1_05348	CP027706_s CMR12a(GCA_003850565.1)	1	5.0					hypothetical protein
1607	GCA_000264555.1_01112	Pseudomonas chlororaphis subsp. aureofaciens O6(GCA_000264555.1)	16	80.0					hypothetical protein
1608	GCA_000264555.1_04535	Pseudomonas chlororaphis subsp. aureofaciens O6(GCA_000264555.1)	16	80.0	G:COG0662				hypothetical protein
1609	GCA_003851405.1_02113	Pseudomonas chlororaphis subsp. aureofaciens 66(GCA_003851405.1)	1	5.0					hypothetical protein
1610	GCA_000698865.1_03460	Pseudomonas chlororaphis subsp. aureofaciens PA23(GCA_000698865.1)	1	5.0					hypothetical protein
1611	GCA_003850565.1_01466	CP027706_s CMR12a(GCA_003850565.1)	1	5.0					hypothetical protein
1612	GCA_003851495.1_02962	Pseudomonas synxantha 2-79(GCA_003851495.1)	1	5.0	S:ENOG410XPIC	K01259	Metabolism of Aromatic Compounds Peripheral pathways for catabolism of aromatic compounds Biphenyl_Degradation 2-hydroxy-6-oxo-6-phenylhexa-2,4-dienoate hydrolase (EC 3.7.1.-)		Prolyl aminopeptidase		KEGG: bur:Bcep18194_A4280 proline iminopeptidase
1613	GCA_000264555.1_05375	Pseudomonas chlororaphis subsp. aureofaciens O6(GCA_000264555.1)	20	100.0	J:COG0261	K02888	Protein Metabolism Protein biosynthesis Ribosome_LSU_bacterial LSU ribosomal protein L21p	GO:0005840,GO:0019843,GO:0003735,GO:0006412	50S ribosomal protein L21	Ribonucleoprotein
1614	GCA_000264555.1_05607	Pseudomonas chlororaphis subsp. aureofaciens O6(GCA_000264555.1)	20	100.0	J:COG0051	K02946	Protein Metabolism Protein biosynthesis Ribosome_SSU_bacterial SSU ribosomal protein S10p (S20e)	GO:0005840,GO:0003735,GO:0000049,GO:0006412	30S ribosomal protein S10	Ribonucleoprotein
1615	GCA_000264555.1_01671	Pseudomonas chlororaphis subsp. aureofaciens O6(GCA_000264555.1)	20	100.0	S:COG4323		Fatty Acids, Lipids, and Isoprenoids Fatty acids Phospholipid_and_Fatty_acid_biosynthesis_related_cluster FIG027190: Putative transmembrane protein		hypothetical protein
1616	GCA_003850445.1_03400	Pseudomonas chlororaphis subsp. piscium PCL1391(GCA_003850445.1)	3	15.0	M:ENOG410XRCF	K18093	Metabolism of Aromatic Compounds Metabolism of central aromatic intermediates Protocatechuate_branch_of_beta-ketoadipate_pathway PhaK-like protein	GO:0016021,GO:0015288,GO:0019439	Porin-like protein NicP	Aromatic hydrocarbons catabolism
1617	GCA_000264555.1_01073	Pseudomonas chlororaphis subsp. aureofaciens O6(GCA_000264555.1)	20	100.0	S:COG3323	K11022	Clustering-based subsystems null EC699-706 FIG042796: Hypothetical protein	GO:0016021	Uncharacterized protein R836	Membrane
1618	GCA_003851495.1_05010	Pseudomonas synxantha 2-79(GCA_003851495.1)	1	5.0					hypothetical protein
1619	GCA_000264555.1_05383	Pseudomonas chlororaphis subsp. aureofaciens O6(GCA_000264555.1)	20	100.0	S:ENOG410Y8BR				hypothetical protein
1620	GCA_000698865.1_04753	Pseudomonas chlororaphis subsp. aureofaciens PA23(GCA_000698865.1)	4	20.0					hypothetical protein
1621	GCA_001921865.1_00081	MSCT_s PCL1601(GCA_001921865.1)	1	5.0					hypothetical protein
1622	GCA_000264555.1_02822	Pseudomonas chlororaphis subsp. aureofaciens O6(GCA_000264555.1)	20	100.0	S:COG4392				hypothetical protein
1623	GCA_000264555.1_00767	Pseudomonas chlororaphis subsp. aureofaciens O6(GCA_000264555.1)	19	95.0	S:COG1359				Uncharacterized protein sll1783		Belongs to the LsrG family
1624	GCA_000281915.1_00510	Pseudomonas chlororaphis subsp. chlororaphis 30-84(GCA_000281915.1)	1	5.0	D:COG4942	K22719	Clustering-based subsystems null CBSS-224911.1.peg.435 Peptidase M23B precursor		hypothetical protein
1625	GCA_003851265.1_00357	Pseudomonas chlororaphis subsp. aurantiaca M71(GCA_003851265.1)	1	5.0					hypothetical protein
1626	GCA_003851495.1_03778	Pseudomonas synxantha 2-79(GCA_003851495.1)	1	5.0					hypothetical protein
1627	GCA_003851495.1_03195	Pseudomonas synxantha 2-79(GCA_003851495.1)	1	5.0					hypothetical protein
1628	GCA_000264555.1_04009	Pseudomonas chlororaphis subsp. aureofaciens O6(GCA_000264555.1)	19	95.0	K:COG2944	K07726		GO:0043565,GO:0006355,GO:0006351	Antitoxin igA-2	DNA-binding
1629	GCA_000264555.1_03874	Pseudomonas chlororaphis subsp. aureofaciens O6(GCA_000264555.1)	20	100.0	I:COG3255	K08764			Propanoyl-CoA C-acyltransferase		KEGG: tad:TRIADDRAFT_59384 sterol carrier protein 2
1630	GCA_003851165.1_02058	Pseudomonas chlororaphis subsp. aurantiaca M12(GCA_003851165.1)	2	10.0					hypothetical protein
1631	GCA_003850365.1_03143	Pseudomonas chlororaphis subsp. piscium ATCC 17809(GCA_003850365.1)	4	20.0	S:COG1359				uncharacterized protein		Belongs to the LsrG family
1632	GCA_000264555.1_04102	Pseudomonas chlororaphis subsp. aureofaciens O6(GCA_000264555.1)	20	100.0	S:COG3212				hypothetical protein
1633	GCA_000264555.1_05594	Pseudomonas chlororaphis subsp. aureofaciens O6(GCA_000264555.1)	20	100.0	J:COG0198	K02895	Protein Metabolism Protein biosynthesis Ribosome_LSU_bacterial LSU ribosomal protein L24p (L26e)	GO:0005840,GO:0019843,GO:0003735,GO:0006412	50S ribosomal protein L24	Ribonucleoprotein
1634	GCA_000264555.1_04351	Pseudomonas chlororaphis subsp. aureofaciens O6(GCA_000264555.1)	20	100.0	S:COG4575	K05594	Clustering-based subsystems null Conserved_cluster_in_Enterobacteriaceae_downstream_from_YqjA,_a_DedA_family_protein Uncharacterized membrane protein YqjD	GO:0016021,GO:0005886	Protein ElaB	Acetylation
1635	GCA_000963835.1_00461	CP010892_s PCL1606(GCA_000963835.1)	1	5.0	S:COG5489				Uncharacterized protein y4eB	Plasmid.
1636	GCA_000264555.1_01624	Pseudomonas chlororaphis subsp. aureofaciens O6(GCA_000264555.1)	20	100.0					hypothetical protein
1637	GCA_000264555.1_00202	Pseudomonas chlororaphis subsp. aureofaciens O6(GCA_000264555.1)	20	100.0	S:ENOG41128YJ				hypothetical protein
1638	GCA_003851405.1_01854	Pseudomonas chlororaphis subsp. aureofaciens 66(GCA_003851405.1)	1	5.0					hypothetical protein
1639	GCA_000264555.1_01052	Pseudomonas chlororaphis subsp. aureofaciens O6(GCA_000264555.1)	20	100.0	L:COG2827	K07461	Clustering-based subsystems null CBSS-214092.1.peg.3450 FIG137864: putative endonuclease containing a URI domain		UPF0213 protein PP_0972		Belongs to the UPF0213 family
1640	GCA_003851495.1_01503	Pseudomonas synxantha 2-79(GCA_003851495.1)	1	5.0					hypothetical protein
1641	GCA_000264555.1_01406	Pseudomonas chlororaphis subsp. aureofaciens O6(GCA_000264555.1)	20	100.0	K:COG0640	K03892		GO:0003677,GO:0003700,GO:0006351	Uncharacterized HTH-type transcriptional regulator YbzH	DNA-binding
1642	GCA_003850565.1_02808	CP027706_s CMR12a(GCA_003850565.1)	2	10.0	C:COG4654	K08738	Respiration null Soluble_cytochromes_and_functionally_related_electron_carriers Cytochrome c551/c552	GO:0042597,GO:0009055,GO:0020037,GO:0005506,GO:0055114	Cytochrome c-551	Electron transport
1643	GCA_000264555.1_02015	Pseudomonas chlororaphis subsp. aureofaciens O6(GCA_000264555.1)	19	95.0	K:ENOG410XUC3		Amino Acids and Derivatives Arginine
1644	GCA_000698865.1_03032	Pseudomonas chlororaphis subsp. aureofaciens PA23(GCA_000698865.1)	4	20.0	S:ENOG4111XM7				hypothetical protein
1645	GCA_000264555.1_02790	Pseudomonas chlororaphis subsp. aureofaciens O6(GCA_000264555.1)	18	90.0					hypothetical protein
1646	GCA_000264555.1_01317	Pseudomonas chlororaphis subsp. aureofaciens O6(GCA_000264555.1)	20	100.0	J:COG0621	K14441	Protein Metabolism Protein processing and modification Ribosomal_protein_S12p_Asp_methylthiotransferase Ribosomal protein S12p Asp88 (E. coli) methylthiotransferase	GO:0005737,GO:0051539,GO:0005506,GO:0016740,GO:0018339,GO:0009451	[Ribosomal protein S12] (aspartate(89)-C(3))-methylthiotransferase	4Fe-4S
1647	GCA_000963835.1_00587	CP010892_s PCL1606(GCA_000963835.1)	6	30.0	S:ENOG4111U6C				Uncharacterized 12.7 kDa protein in lys 3'region
1648	GCA_003851495.1_04938	Pseudomonas synxantha 2-79(GCA_003851495.1)	1	5.0	S:ENOG410ZUYM				hypothetical protein
1649	GCA_000264555.1_02498	Pseudomonas chlororaphis subsp. aureofaciens O6(GCA_000264555.1)	18	90.0	S:ENOG410ZCFD		Iron acquisition and metabolism null Hemin_transport_system Outer membrane receptor proteins, mostly Fe transport		hypothetical protein
1650	GCA_000264555.1_02603	Pseudomonas chlororaphis subsp. aureofaciens O6(GCA_000264555.1)	19	95.0	S:COG0446	K10814	Virulence, Disease and Defense null Bacterial_cyanide_production_and_tolerance_mechanisms Hydrogen cyanide synthase HcnA	GO:0005886,GO:0051537,GO:0009055,GO:0050622,GO:0046872	Glycine dehydrogenase (cyanide-forming)	2Fe-2S
1651	GCA_000264555.1_02117	Pseudomonas chlororaphis subsp. aureofaciens O6(GCA_000264555.1)	2	10.0					hypothetical protein
1652	GCA_000264555.1_02701	Pseudomonas chlororaphis subsp. aureofaciens O6(GCA_000264555.1)	19	95.0	S:ENOG4111VQE				hypothetical protein
1653	GCA_000264555.1_05942	Pseudomonas chlororaphis subsp. aureofaciens O6(GCA_000264555.1)	20	100.0	S:ENOG410ZCFD		Iron acquisition and metabolism null Hemin_transport_system Outer membrane receptor proteins, mostly Fe transport		hypothetical protein
1654	GCA_000264555.1_04005	Pseudomonas chlororaphis subsp. aureofaciens O6(GCA_000264555.1)	20	100.0	C:COG0713	K00340	Respiration Electron donating reactions Respiratory_Complex_I NADH-ubiquinone oxidoreductase chain K (EC 1.6.5.3)	GO:0016021,GO:0005886,GO:0050136,GO:0048038,GO:0042773,GO:0006810	NADH:ubiquinone reductase (H(+)-translocating)	Cell inner membrane
1655	GCA_000264555.1_05300	Pseudomonas chlororaphis subsp. aureofaciens O6(GCA_000264555.1)	20	100.0	C:COG2146		Respiration null Soluble_cytochromes_and_functionally_related_electron_carriers Ferredoxin, 2Fe-2S		hypothetical protein
1656	GCA_000264555.1_01988	Pseudomonas chlororaphis subsp. aureofaciens O6(GCA_000264555.1)	19	95.0	C:COG2146	K00363	Nitrogen Metabolism null Nitrate_and_nitrite_ammonification Nitrite reductase [NAD(P)H] small subunit (EC 1.7.1.4)	GO:0005737,GO:0051537,GO:0046872,GO:0008942,GO:0042128	Nitrite reductase (NADH)	2Fe-2S
1657	GCA_003850365.1_03767	Pseudomonas chlororaphis subsp. piscium ATCC 17809(GCA_003850365.1)	1	5.0	L:COG0550	K03169	DNA Metabolism DNA replication DNA_topoisomerases,_Type_I,_ATP-independent DNA topoisomerase III (EC 5.99.1.2)	GO:0003677,GO:0003917,GO:0046872,GO:0051304,GO:0006310,GO:0006265	DNA topoisomerase	DNA-binding
1658	GCA_000264555.1_04656	Pseudomonas chlororaphis subsp. aureofaciens O6(GCA_000264555.1)	20	100.0					hypothetical protein
1659	GCA_003850565.1_01599	CP027706_s CMR12a(GCA_003850565.1)	1	5.0					hypothetical protein
1660	GCA_000264555.1_04532	Pseudomonas chlororaphis subsp. aureofaciens O6(GCA_000264555.1)	20	100.0	P:COG2076	K11741		GO:0016021,GO:0005886,GO:0006810	Quaternary ammonium compound-resistance protein SugE	Cell inner membrane
1661	GCA_003851405.1_03052	Pseudomonas chlororaphis subsp. aureofaciens 66(GCA_003851405.1)	3	15.0	S:ENOG410Y264				hypothetical protein
1662	GCA_000264555.1_00114	Pseudomonas chlororaphis subsp. aureofaciens O6(GCA_000264555.1)	20	100.0	S:ENOG410Z16V		Iron acquisition and metabolism null Hemin_transport_system Outer membrane receptor proteins, mostly Fe transport		hypothetical protein
1663	GCA_003851265.1_00898	Pseudomonas chlororaphis subsp. aurantiaca M71(GCA_003851265.1)	1	5.0					hypothetical protein
1664	GCA_003851495.1_04262	Pseudomonas synxantha 2-79(GCA_003851495.1)	2	10.0	L:ENOG4112B6S	K07483			hypothetical protein
1665	GCA_003850565.1_01635	CP027706_s CMR12a(GCA_003850565.1)	1	5.0	C:COG3794,M:COG2335	K21430	Virulence, Disease and Defense Resistance to antibiotics and toxic compounds Copper_homeostasis Multicopper oxidase		hypothetical protein		KEGG: taa:NMY3_01795 aldose sugar dehydrogenase
1666	GCA_001921865.1_03544	MSCT_s PCL1601(GCA_001921865.1)	2	10.0	S:ENOG4111VFU				hypothetical protein
1667	GCA_000698865.1_01344	Pseudomonas chlororaphis subsp. aureofaciens PA23(GCA_000698865.1)	1	5.0					hypothetical protein
1668	GCA_000264555.1_00022	Pseudomonas chlororaphis subsp. aureofaciens O6(GCA_000264555.1)	20	100.0	S:COG0457	K06980			TPR repeat-containing protein PA0015	Repeat
1669	GCA_000264555.1_04670	Pseudomonas chlororaphis subsp. aureofaciens O6(GCA_000264555.1)	20	100.0	S:COG3212				hypothetical protein
1670	GCA_000698865.1_03002	Pseudomonas chlororaphis subsp. aureofaciens PA23(GCA_000698865.1)	4	20.0					hypothetical protein
1671	GCA_000264555.1_03546	Pseudomonas chlororaphis subsp. aureofaciens O6(GCA_000264555.1)	19	95.0	S:COG0393		Phages, Prophages, Transposable elements, Plasmids Pathogenicity islands Listeria_Pathogenicity_Island_LIPI-1_extended virulence cluster protein B VclB		UPF0145 protein gll1048		Belongs to the UPF0145 family.
1672	GCA_003850365.1_03737	Pseudomonas chlororaphis subsp. piscium ATCC 17809(GCA_003850365.1)	1	5.0	S:ENOG4112CK1				hypothetical protein
1673	GCA_000698865.1_02525	Pseudomonas chlororaphis subsp. aureofaciens PA23(GCA_000698865.1)	2	10.0					hypothetical protein
1674	GCA_000264555.1_00335	Pseudomonas chlororaphis subsp. aureofaciens O6(GCA_000264555.1)	16	80.0	S:COG5605	K02277			Cytochrome-c oxidase		KEGG: tmr:Tmar_0408 cytochrome c oxidase subunit IV
1675	GCA_003851495.1_01974	Pseudomonas synxantha 2-79(GCA_003851495.1)	1	5.0					hypothetical protein
1676	GCA_000264555.1_04346	Pseudomonas chlororaphis subsp. aureofaciens O6(GCA_000264555.1)	20	100.0					hypothetical protein
1677	GCA_000264555.1_04608	Pseudomonas chlororaphis subsp. aureofaciens O6(GCA_000264555.1)	20	100.0	K:ENOG410XUJS	K02398	Motility and Chemotaxis Flagellar motility in Prokaryota Flagellum Negative regulator of flagellin synthesis FlgM		negative regulator of flagellin synthesis FlgM
1678	GCA_003850565.1_03040	CP027706_s CMR12a(GCA_003850565.1)	1	5.0	S:ENOG410ZF59				hypothetical protein
1679	GCA_003850365.1_04936	Pseudomonas chlororaphis subsp. piscium ATCC 17809(GCA_003850365.1)	1	5.0	S:ENOG4111U1F	K20761			Thiocyanate hydrolase		KEGG: rha:RHA1_ro04430 thiocyanate hydrolase subunit beta
1680	GCA_003850565.1_03381	CP027706_s CMR12a(GCA_003850565.1)	1	5.0	S:ENOG410Y4RD				hypothetical protein
1681	GCA_000264555.1_05939	Pseudomonas chlororaphis subsp. aureofaciens O6(GCA_000264555.1)	20	100.0					hypothetical protein
1682	GCA_000698865.1_00693	Pseudomonas chlororaphis subsp. aureofaciens PA23(GCA_000698865.1)	10	50.0	S:COG2914	K09801			Protein RnfH		Belongs to the UPF0125 (RnfH) family.
1683	GCA_000264555.1_00656	Pseudomonas chlororaphis subsp. aureofaciens O6(GCA_000264555.1)	20	100.0	K:COG2901	K03557	DNA Metabolism null DNA_structural_proteins,_bacterial DNA-binding protein Fis	GO:0000787,GO:0000156,GO:0043565,GO:0003700,GO:0044212,GO:0000160,GO:0006355	Putative Fis-like DNA-binding protein	DNA-binding.	Belongs to the transcriptional regulatory Fis family.
1684	GCA_000264555.1_05472	Pseudomonas chlororaphis subsp. aureofaciens O6(GCA_000264555.1)	20	100.0					hypothetical protein
1685	GCA_003851495.1_03898	Pseudomonas synxantha 2-79(GCA_003851495.1)	1	5.0	S:ENOG4111UFS	K13766	Fatty Acids, Lipids, and Isoprenoids Isoprenoids Acyclic_terpenes_utilization 3-hydroxy-3isohexenylglutaryl-CoA:acetate lyase		Methylglutaconyl-CoA hydratase		KEGG: pbor:BSF38_01746 methylglutaconyl-CoA hydratase
1686	GCA_003851165.1_02533	Pseudomonas chlororaphis subsp. aurantiaca M12(GCA_003851165.1)	6	30.0	C:COG2146	K05710	Nitrogen Metabolism null Nitrate_and_nitrite_ammonification Nitrite reductase [NAD(P)H] small subunit (EC 1.7.1.4)	GO:0051537,GO:0046872,GO:0016491,GO:0019439	Naphthalene 1,2-dioxygenase/salicylate 5-hydroxylase systems, ferredoxin component	2Fe-2S
1687	GCA_003850565.1_00346	CP027706_s CMR12a(GCA_003850565.1)	1	5.0	S:ENOG411284X				hypothetical protein
1688	GCA_000264555.1_05693	Pseudomonas chlororaphis subsp. aureofaciens O6(GCA_000264555.1)	17	85.0	K:COG2944	K07726			putative transcriptional regulator
1689	GCA_000264555.1_03003	Pseudomonas chlororaphis subsp. aureofaciens O6(GCA_000264555.1)	20	100.0	S:COG4575	K05594			hypothetical protein
1690	GCA_003851165.1_03349	Pseudomonas chlororaphis subsp. aurantiaca M12(GCA_003851165.1)	2	10.0					hypothetical protein
1691	GCA_003850565.1_04787	CP027706_s CMR12a(GCA_003850565.1)	1	5.0	S:ENOG410ZF59				hypothetical protein
1692	GCA_003850565.1_05684	CP027706_s CMR12a(GCA_003850565.1)	1	5.0	S:COG2872	K01872			Alanine--tRNA ligase		KEGG: scc:Spico_1301 alanyl-tRNA synthetase
1693	GCA_000264555.1_00112	Pseudomonas chlororaphis subsp. aureofaciens O6(GCA_000264555.1)	20	100.0	S:ENOG410Z16V		Iron acquisition and metabolism null Hemin_transport_system Outer membrane receptor proteins, mostly Fe transport		hypothetical protein
1694	GCA_003850565.1_02087	CP027706_s CMR12a(GCA_003850565.1)	1	5.0	K:ENOG410XUC3				hypothetical protein
1695	GCA_003850445.1_04006	Pseudomonas chlororaphis subsp. piscium PCL1391(GCA_003850445.1)	2	10.0	S:ENOG411299I				hypothetical protein
1696	GCA_000264555.1_01522	Pseudomonas chlororaphis subsp. aureofaciens O6(GCA_000264555.1)	11	55.0					hypothetical protein
1697	GCA_003851205.1_01866	Pseudomonas chlororaphis subsp. aurantiaca 449(GCA_003851205.1)	2	10.0	S:ENOG410Y7DB				hypothetical protein
1698	GCA_000264555.1_00642	Pseudomonas chlororaphis subsp. aureofaciens O6(GCA_000264555.1)	18	90.0	K:ENOG41121ZC				hypothetical protein
1699	GCA_000264555.1_02178	Pseudomonas chlororaphis subsp. aureofaciens O6(GCA_000264555.1)	1	5.0					hypothetical protein
1700	GCA_003851495.1_04923	Pseudomonas synxantha 2-79(GCA_003851495.1)	1	5.0					hypothetical protein
1701	GCA_000264555.1_04480	Pseudomonas chlororaphis subsp. aureofaciens O6(GCA_000264555.1)	20	100.0					hypothetical protein
1702	GCA_003850465.1_00682	Pseudomonas chlororaphis subsp. piscium PCL1607(GCA_003850465.1)	2	10.0					hypothetical protein
1703	GCA_000264555.1_02135	Pseudomonas chlororaphis subsp. aureofaciens O6(GCA_000264555.1)	2	10.0					hypothetical protein
1704	GCA_003851495.1_03009	Pseudomonas synxantha 2-79(GCA_003851495.1)	1	5.0	S:ENOG41125R1				hypothetical protein
1705	GCA_003851495.1_01204	Pseudomonas synxantha 2-79(GCA_003851495.1)	1	5.0	C:COG1146	K05524	Sulfur Metabolism Inorganic sulfur assimilation Inorganic_Sulfur_Assimilation 4Fe-4S ferredoxin, iron-sulfur binding	GO:0051538,GO:0051539,GO:0009055,GO:0046872,GO:0055114	Ferredoxin-1	3Fe-4S
1706	GCA_000264555.1_00996	Pseudomonas chlororaphis subsp. aureofaciens O6(GCA_000264555.1)	19	95.0	S:ENOG410Y4HE				hypothetical protein
1707	GCA_003851205.1_01937	Pseudomonas chlororaphis subsp. aurantiaca 449(GCA_003851205.1)	4	20.0	L:ENOG4111UTW	K07483		GO:0003677,GO:0004803,GO:0006313	Insertion element IS629 uncharacterized 12 kDa protein	Transposable element.	Belongs to the transposase 8 family.
1708	GCA_003850445.1_02552	Pseudomonas chlororaphis subsp. piscium PCL1391(GCA_003850445.1)	5	25.0					hypothetical protein
1709	GCA_000264555.1_05956	Pseudomonas chlororaphis subsp. aureofaciens O6(GCA_000264555.1)	20	100.0	S:COG3027	K09888	Cell Division and Cell Cycle null Bacterial_Cytoskeleton Z-ring-associated protein ZapA	GO:0005737,GO:0000917	Cell division protein ZapA	Cell cycle
1710	GCA_000264555.1_05851	Pseudomonas chlororaphis subsp. aureofaciens O6(GCA_000264555.1)	20	100.0	S:ENOG41123MS				hypothetical protein
1711	GCA_000264555.1_06187	Pseudomonas chlororaphis subsp. aureofaciens O6(GCA_000264555.1)	20	100.0	K:COG5606				hypothetical protein
1712	GCA_003850565.1_05316	CP027706_s CMR12a(GCA_003850565.1)	1	5.0	S:ENOG41122A6				hypothetical protein
1713	GCA_003850365.1_05551	Pseudomonas chlororaphis subsp. piscium ATCC 17809(GCA_003850365.1)	1	5.0					hypothetical protein
1714	GCA_003851495.1_02992	Pseudomonas synxantha 2-79(GCA_003851495.1)	1	5.0	O:COG0526	K03671	Protein Metabolism Selenoproteins Glycine_reductase,_sarcosine_reductase_and_betaine_reductase Thioredoxin	GO:0005623,GO:0015035,GO:0045454,GO:0006662	Thioredoxin C-1	Disulfide bond
1715	GCA_000264555.1_05003	Pseudomonas chlororaphis subsp. aureofaciens O6(GCA_000264555.1)	20	100.0	S:COG0316	K13628	RNA Metabolism RNA processing and modification tRNA_modification_Bacteria Iron binding protein IscA for iron-sulfur cluster assembly	GO:0005506,GO:0051536,GO:0005198,GO:0016226	Iron-binding protein IscA	Iron
1716	GCA_003851495.1_00202	Pseudomonas synxantha 2-79(GCA_003851495.1)	1	5.0					hypothetical protein
1717	GCA_000281915.1_03636	Pseudomonas chlororaphis subsp. chlororaphis 30-84(GCA_000281915.1)	1	5.0	S:COG3803	K22614	Fatty Acids, Lipids, and Isoprenoids Fatty acids Phospholipid_and_Fatty_acid_biosynthesis_related_cluster FIG027190: Putative transmembrane protein		hypothetical protein
1718	GCA_003850565.1_02807	CP027706_s CMR12a(GCA_003850565.1)	2	10.0	C:COG2010	K19344	Nitrogen Metabolism null Dissimilatory_nitrite_reductase Cytochrome c55X precursor NirC	GO:0042597,GO:0009055,GO:0020037,GO:0046872,GO:0055114	Cytochrome c55X	Electron transport
1719	GCA_000264555.1_03855	Pseudomonas chlororaphis subsp. aureofaciens O6(GCA_000264555.1)	12	60.0					hypothetical protein
1720	GCA_000264555.1_02863	Pseudomonas chlororaphis subsp. aureofaciens O6(GCA_000264555.1)	19	95.0	S:ENOG410Z16V		Iron acquisition and metabolism null Hemin_transport_system Outer membrane receptor proteins, mostly Fe transport		hypothetical protein
1721	GCA_000264555.1_04665	Pseudomonas chlororaphis subsp. aureofaciens O6(GCA_000264555.1)	20	100.0	S:COG2329	K00799			Glutathione transferase		Contains 1 ABM domain.
1722	GCA_003851495.1_03295	Pseudomonas synxantha 2-79(GCA_003851495.1)	1	5.0					hypothetical protein
1723	GCA_003850565.1_05310	CP027706_s CMR12a(GCA_003850565.1)	1	5.0	S:COG0457				hypothetical protein
1724	GCA_003850565.1_05585	CP027706_s CMR12a(GCA_003850565.1)	1	5.0					hypothetical protein
1725	GCA_000264555.1_04257	Pseudomonas chlororaphis subsp. aureofaciens O6(GCA_000264555.1)	17	85.0	C:ENOG4111PMI			GO:0042597,GO:0016638	Quinohemoprotein amine dehydrogenase subunit gamma	CTQ
1726	GCA_000264555.1_01201	Pseudomonas chlororaphis subsp. aureofaciens O6(GCA_000264555.1)	20	100.0	C:COG1146	K05524	Sulfur Metabolism Inorganic sulfur assimilation Inorganic_Sulfur_Assimilation 4Fe-4S ferredoxin, iron-sulfur binding	GO:0051538,GO:0051539,GO:0009055,GO:0046872,GO:0055114	Ferredoxin-1	3Fe-4S
1727	GCA_000281915.1_02226	Pseudomonas chlororaphis subsp. chlororaphis 30-84(GCA_000281915.1)	1	5.0					hypothetical protein
1728	GCA_003851495.1_01240	Pseudomonas synxantha 2-79(GCA_003851495.1)	1	5.0					hypothetical protein
1729	GCA_003851165.1_01884	Pseudomonas chlororaphis subsp. aurantiaca M12(GCA_003851165.1)	1	5.0					hypothetical protein
1730	GCA_000698865.1_04055	Pseudomonas chlororaphis subsp. aureofaciens PA23(GCA_000698865.1)	10	50.0					hypothetical protein
1731	GCA_000264555.1_02171	Pseudomonas chlororaphis subsp. aureofaciens O6(GCA_000264555.1)	4	20.0					hypothetical protein
1732	GCA_003850565.1_04842	CP027706_s CMR12a(GCA_003850565.1)	1	5.0					hypothetical protein
1733	GCA_003850565.1_00223	CP027706_s CMR12a(GCA_003850565.1)	3	15.0					hypothetical protein
1734	GCA_000264555.1_06012	Pseudomonas chlororaphis subsp. aureofaciens O6(GCA_000264555.1)	20	100.0	S:ENOG410XZ5D				hypothetical protein
1735	GCA_000264555.1_00119	Pseudomonas chlororaphis subsp. aureofaciens O6(GCA_000264555.1)	20	100.0	C:COG3288	K00324	Phosphorus Metabolism null Phosphate_metabolism NAD(P) transhydrogenase alpha subunit (EC 1.6.1.2)	GO:0016021,GO:0005886,GO:0008750	NAD(P)(+) transhydrogenase (Re/Si-specific)	Cell inner membrane
1736	GCA_000264555.1_01729	Pseudomonas chlororaphis subsp. aureofaciens O6(GCA_000264555.1)	20	100.0	N:COG1677	K02408	Motility and Chemotaxis Flagellar motility in Prokaryota Flagellum Flagellar hook-basal body complex protein FliE	GO:0009425,GO:0003774,GO:0005198,GO:0071973	Flagellar hook-basal body complex protein FliE	Bacterial flagellum.	Belongs to the FliE family.
1737	GCA_000963835.1_05846	CP010892_s PCL1606(GCA_000963835.1)	1	5.0	Q:COG2931	K12549	Motility and Chemotaxis Flagellar motility in Prokaryota Flagellum Flagellar hook-length control protein FliK		surface adhesion protein
1738	GCA_003851495.1_04561	Pseudomonas synxantha 2-79(GCA_003851495.1)	1	5.0	U:COG3210	K15125	Clustering-based subsystems null CBSS-316057.3.peg.3521 Large exoproteins involved in heme utilization or adhesion		hypothetical protein
1739	GCA_000264555.1_00038	Pseudomonas chlororaphis subsp. aureofaciens O6(GCA_000264555.1)	20	100.0	Q:COG3805	K10253		GO:0005737,GO:0051213	DOPA 4,5-dioxygenase	Cytoplasm
1740	GCA_000264555.1_02105	Pseudomonas chlororaphis subsp. aureofaciens O6(GCA_000264555.1)	3	15.0					hypothetical protein
1741	GCA_000264555.1_01528	Pseudomonas chlororaphis subsp. aureofaciens O6(GCA_000264555.1)	11	55.0	S:COG3628	K06903		GO:0019012,GO:0019076	Baseplate protein W	Late protein
1742	GCA_000264555.1_01135	Pseudomonas chlororaphis subsp. aureofaciens O6(GCA_000264555.1)	20	100.0	S:ENOG410Y5K0				hypothetical protein
1743	GCA_000264555.1_04624	Pseudomonas chlororaphis subsp. aureofaciens O6(GCA_000264555.1)	20	100.0	K:ENOG410XX7F		Cell Wall and Capsule Capsular and extracellular polysacchrides Alginate_metabolism Alginate biosynthesis transcriptional activator		hypothetical protein
1744	GCA_000264555.1_04029	Pseudomonas chlororaphis subsp. aureofaciens O6(GCA_000264555.1)	19	95.0	S:COG3422	K09946			UPF0339 protein ACIAD0721	Repeat.	Belongs to the UPF0339 family. Duplicated subfamily.
1745	GCA_003850565.1_00679	CP027706_s CMR12a(GCA_003850565.1)	1	5.0					hypothetical protein
1746	GCA_000264555.1_05109	Pseudomonas chlororaphis subsp. aureofaciens O6(GCA_000264555.1)	16	80.0					hypothetical protein
1747	GCA_000264555.1_01244	Pseudomonas chlororaphis subsp. aureofaciens O6(GCA_000264555.1)	1	5.0	S:ENOG410ZISF				hypothetical protein
1748	GCA_000264555.1_03547	Pseudomonas chlororaphis subsp. aureofaciens O6(GCA_000264555.1)	20	100.0	E:COG1605	K04782	Amino Acids and Derivatives Aromatic amino acids and derivatives Chorismate:_Intermediate_for_synthesis_of_PAPA_antibiotics,_PABA,_anthranilate,_3-hydroxyanthranilate_and_more. Isochorismate pyruvate-lyase (EC 4.-.-.-)	GO:0016835,GO:0004106,GO:0046417,GO:0042864,GO:0009697	Isochorismate lyase	Isomerase
1749	GCA_003850565.1_03489	CP027706_s CMR12a(GCA_003850565.1)	4	20.0					hypothetical protein
1750	GCA_000264555.1_00043	Pseudomonas chlororaphis subsp. aureofaciens O6(GCA_000264555.1)	20	100.0	S:COG4575		Clustering-based subsystems null Conserved_cluster_in_Enterobacteriaceae_downstream_from_YqjA,_a_DedA_family_protein Uncharacterized membrane protein YqjD	GO:0016021,GO:0005886	Uncharacterized protein YqjD	Cell inner membrane
1751	GCA_003851265.1_02075	Pseudomonas chlororaphis subsp. aurantiaca M71(GCA_003851265.1)	1	5.0	L:ENOG4111SQK	K07497			hypothetical protein
1752	GCA_000264555.1_05465	Pseudomonas chlororaphis subsp. aureofaciens O6(GCA_000264555.1)	20	100.0	S:COG4517				hypothetical protein
1753	GCA_000264555.1_00985	Pseudomonas chlororaphis subsp. aureofaciens O6(GCA_000264555.1)	20	100.0					hypothetical protein
1754	GCA_000264555.1_05667	Pseudomonas chlororaphis subsp. aureofaciens O6(GCA_000264555.1)	20	100.0	P:COG0607	K02439	Carbohydrates Sugar alcohols Glycerol_and_Glycerol-3-phosphate_Uptake_and_Utilization Thiosulfate sulfurtransferase GlpE (EC 2.8.1.1)	GO:0005737,GO:0004792,GO:0006071	Thiosulfate sulfurtransferase	Cytoplasm
1755	GCA_000264555.1_05753	Pseudomonas chlororaphis subsp. aureofaciens O6(GCA_000264555.1)	19	95.0	K:ENOG4112CXM				hypothetical protein
1756	GCA_003851495.1_04746	Pseudomonas synxantha 2-79(GCA_003851495.1)	1	5.0					hypothetical protein
1757	GCA_003851495.1_03326	Pseudomonas synxantha 2-79(GCA_003851495.1)	1	5.0					hypothetical protein
1758	GCA_003851495.1_02063	Pseudomonas synxantha 2-79(GCA_003851495.1)	1	5.0	M:COG3209				hypothetical protein
1759	GCA_000264555.1_04128	Pseudomonas chlororaphis subsp. aureofaciens O6(GCA_000264555.1)	5	25.0					hypothetical protein
1760	GCA_000264555.1_05785	Pseudomonas chlororaphis subsp. aureofaciens O6(GCA_000264555.1)	20	100.0					hypothetical protein
1761	GCA_000264555.1_03676	Pseudomonas chlororaphis subsp. aureofaciens O6(GCA_000264555.1)	9	45.0					hypothetical protein
1762	GCA_000264555.1_01502	Pseudomonas chlororaphis subsp. aureofaciens O6(GCA_000264555.1)	3	15.0	S:ENOG4112D6A				hypothetical protein
1763	GCA_000264555.1_02512	Pseudomonas chlororaphis subsp. aureofaciens O6(GCA_000264555.1)	20	100.0	S:ENOG410Z6PG				hypothetical protein
1764	GCA_003850565.1_02605	CP027706_s CMR12a(GCA_003850565.1)	1	5.0					hypothetical protein
1765	GCA_003850365.1_03800	Pseudomonas chlororaphis subsp. piscium ATCC 17809(GCA_003850365.1)	2	10.0					hypothetical protein
1766	GCA_003851205.1_01852	Pseudomonas chlororaphis subsp. aurantiaca 449(GCA_003851205.1)	1	5.0	S:ENOG41122QA			GO:0019076	Tail assembly protein E'	Late protein
1767	GCA_003851495.1_04918	Pseudomonas synxantha 2-79(GCA_003851495.1)	1	5.0	S:ENOG4112BD5		Phages, Prophages, Transposable elements, Plasmids Phages, Prophages Phage_tail_proteins_2 Phage tail length tape-measure protein		Phage-like element PBSX protein XkdO		To B.subtilis YqbO.
1768	GCA_000264555.1_03556	Pseudomonas chlororaphis subsp. aureofaciens O6(GCA_000264555.1)	18	90.0	S:ENOG410ZHIV				hypothetical protein
1769	GCA_000264555.1_01412	Pseudomonas chlororaphis subsp. aureofaciens O6(GCA_000264555.1)	20	100.0	S:ENOG410ZAGI				hypothetical protein
1770	GCA_000264555.1_01761	Pseudomonas chlororaphis subsp. aureofaciens O6(GCA_000264555.1)	20	100.0	S:COG2257	K04061	Motility and Chemotaxis Flagellar motility in Prokaryota Flagellum Flagellar biosynthesis protein FlhB	GO:0016021,GO:0005886,GO:0034053,GO:0009306	Hypersensitivity response secretion protein HrcU	Cell membrane
1771	GCA_003851265.1_00352	Pseudomonas chlororaphis subsp. aurantiaca M71(GCA_003851265.1)	1	5.0					hypothetical protein
1772	GCA_000264555.1_02715	Pseudomonas chlororaphis subsp. aureofaciens O6(GCA_000264555.1)	11	55.0	S:COG0599	K01607	Metabolism of Aromatic Compounds Metabolism of central aromatic intermediates Protocatechuate_branch_of_beta-ketoadipate_pathway 4-carboxymuconolactone decarboxylase (EC 4.1.1.44)	GO:0047575,GO:0051920,GO:0042952	4-carboxymuconolactone decarboxylase	Aromatic hydrocarbons catabolism
1773	GCA_003850565.1_00260	CP027706_s CMR12a(GCA_003850565.1)	1	5.0					hypothetical protein
1774	GCA_003850565.1_05582	CP027706_s CMR12a(GCA_003850565.1)	2	10.0					hypothetical protein
1775	GCA_003850565.1_00349	CP027706_s CMR12a(GCA_003850565.1)	1	5.0					hypothetical protein
1776	GCA_003850565.1_02633	CP027706_s CMR12a(GCA_003850565.1)	1	5.0	T:COG4551	K01104			Protein-tyrosine-phosphatase		KEGG: chu:CHU_1113 protein-tyrosine phosphatase
1777	GCA_001921865.1_00731	MSCT_s PCL1601(GCA_001921865.1)	3	15.0	S:ENOG4111P3S				hypothetical protein
1778	GCA_000264555.1_02455	Pseudomonas chlororaphis subsp. aureofaciens O6(GCA_000264555.1)	20	100.0					hypothetical protein
1779	GCA_000264555.1_03942	Pseudomonas chlororaphis subsp. aureofaciens O6(GCA_000264555.1)	19	95.0	S:ENOG410XVYR				hypothetical protein
1780	GCA_000264555.1_05735	Pseudomonas chlororaphis subsp. aureofaciens O6(GCA_000264555.1)	20	100.0	E:COG4311	K00304	Stress Response Osmotic stress Choline_and_Betaine_Uptake_and_Betaine_Biosynthesis Sarcosine oxidase delta subunit (EC 1.5.3.1)	GO:0005737,GO:0008115,GO:0046653	Sarcosine oxidase	Cytoplasm
1781	GCA_001921865.1_05793	MSCT_s PCL1601(GCA_001921865.1)	6	30.0	S:ENOG4111P9I		Amino Acids and Derivatives Lysine, threonine, methionine, and cysteine Threonine_and_Homoserine_Biosynthesis Threonine synthase (EC 4.2.3.1)		hypothetical protein
1782	GCA_000264555.1_01269	Pseudomonas chlororaphis subsp. aureofaciens O6(GCA_000264555.1)	20	100.0		K06903			uncharacterized protein
1783	GCA_000264555.1_05971	Pseudomonas chlororaphis subsp. aureofaciens O6(GCA_000264555.1)	20	100.0	O:COG0526	K03671	Protein Metabolism Selenoproteins Glycine_reductase,_sarcosine_reductase_and_betaine_reductase Thioredoxin	GO:0005737,GO:0016671,GO:0015035,GO:0045454,GO:0034599,GO:0006662,GO:0055114,GO:0006457,GO:0000103	Thioredoxin-1	Cytoplasm
1784	GCA_003850565.1_02122	CP027706_s CMR12a(GCA_003850565.1)	1	5.0					hypothetical protein
1785	GCA_003851495.1_00306	Pseudomonas synxantha 2-79(GCA_003851495.1)	1	5.0	S:ENOG410ZUYM				hypothetical protein
1786	GCA_003850365.1_00780	Pseudomonas chlororaphis subsp. piscium ATCC 17809(GCA_003850365.1)	1	5.0					hypothetical protein
1787	GCA_003851265.1_03454	Pseudomonas chlororaphis subsp. aurantiaca M71(GCA_003851265.1)	1	5.0					hypothetical protein
1788	GCA_000698865.1_01324	Pseudomonas chlororaphis subsp. aureofaciens PA23(GCA_000698865.1)	1	5.0					hypothetical protein
1789	GCA_003850565.1_05580	CP027706_s CMR12a(GCA_003850565.1)	1	5.0					hypothetical protein
1790	GCA_000264555.1_06052	Pseudomonas chlororaphis subsp. aureofaciens O6(GCA_000264555.1)	1	5.0	S:COG3422	K09946			uncharacterized protein
1791	GCA_000264555.1_00430	Pseudomonas chlororaphis subsp. aureofaciens O6(GCA_000264555.1)	20	100.0	E:COG0140	K01523	Amino Acids and Derivatives Histidine Metabolism Histidine_Biosynthesis Phosphoribosyl-ATP pyrophosphatase (EC 3.6.1.31)	GO:0005737,GO:0005524,GO:0004636,GO:0000105	Phosphoribosyl-ATP diphosphatase	Amino-acid biosynthesis
1792	GCA_000264555.1_05251	Pseudomonas chlororaphis subsp. aureofaciens O6(GCA_000264555.1)	20	100.0					hypothetical protein
1793	GCA_000264555.1_03965	Pseudomonas chlororaphis subsp. aureofaciens O6(GCA_000264555.1)	19	95.0					hypothetical protein
1794	GCA_003851405.1_04251	Pseudomonas chlororaphis subsp. aureofaciens 66(GCA_003851405.1)	1	5.0					hypothetical protein
1795	GCA_000698865.1_05470	Pseudomonas chlororaphis subsp. aureofaciens PA23(GCA_000698865.1)	2	10.0					hypothetical protein
1796	GCA_000281915.1_04119	Pseudomonas chlororaphis subsp. chlororaphis 30-84(GCA_000281915.1)	2	10.0					hypothetical protein
1797	GCA_000264555.1_00530	Pseudomonas chlororaphis subsp. aureofaciens O6(GCA_000264555.1)	20	100.0	P:COG2076	K03297		GO:0016021,GO:0005886,GO:0015606	Spermidine export protein MdtJ	Cell inner membrane
1798	GCA_000264555.1_06081	Pseudomonas chlororaphis subsp. aureofaciens O6(GCA_000264555.1)	11	55.0	L:COG3039	K07481		GO:0003677,GO:0004803,GO:0006313	Transposase InsH for insertion sequence element IS5R	DNA recombination
1799	GCA_003850465.1_00670	Pseudomonas chlororaphis subsp. piscium PCL1607(GCA_003850465.1)	2	10.0	S:ENOG4111M73				hypothetical protein
1800	GCA_000698865.1_03026	Pseudomonas chlororaphis subsp. aureofaciens PA23(GCA_000698865.1)	2	10.0	S:ENOG4111UVG				hypothetical protein
1801	GCA_003850365.1_03661	Pseudomonas chlororaphis subsp. piscium ATCC 17809(GCA_003850365.1)	1	5.0					hypothetical protein
1802	GCA_003851345.1_05951	Pseudomonas chlororaphis subsp. aurantiaca Q16(GCA_003851345.1)	2	10.0	S:ENOG410XRCD				hypothetical protein
1803	GCA_000264555.1_03585	Pseudomonas chlororaphis subsp. aureofaciens O6(GCA_000264555.1)	2	10.0					hypothetical protein
1804	GCA_000264555.1_04666	Pseudomonas chlororaphis subsp. aureofaciens O6(GCA_000264555.1)	20	100.0					hypothetical protein
1805	GCA_000264555.1_03697	Pseudomonas chlororaphis subsp. aureofaciens O6(GCA_000264555.1)	14	70.0	K:COG1733	K03098	Carbohydrates One-carbon Metabolism Formaldehyde_assimilation:_Ribulose_monophosphate_pathway Transcriptional regulator HxlR, formaldehyde assimilation	GO:0003677,GO:0006355,GO:0006351	Putative regulatory protein MalR	DNA-binding
1806	GCA_000264555.1_05600	Pseudomonas chlororaphis subsp. aureofaciens O6(GCA_000264555.1)	20	100.0	J:COG0091	K02890	Protein Metabolism Protein biosynthesis Ribosome_LSU_bacterial LSU ribosomal protein L22p (L17e)	GO:0015934,GO:0019843,GO:0003735,GO:0006412	50S ribosomal protein L22	Ribonucleoprotein
1807	GCA_003851835.1_03405	Pseudomonas chlororaphis subsp. aurantiaca DSM 19603(Type)(GCA_003851835.1)	1	5.0					hypothetical protein
1808	GCA_000264555.1_06005	Pseudomonas chlororaphis subsp. aureofaciens O6(GCA_000264555.1)	20	100.0	P:COG1965	K06202	Respiration null Biogenesis_of_cytochrome_c_oxidases Frataxin homolog CyaY, facilitates iron supply for heme A synthesis or Fe-S cluster assembly	GO:0008199,GO:0016226	Protein CyaY		Belongs to the frataxin family.
1809	GCA_000264555.1_00643	Pseudomonas chlororaphis subsp. aureofaciens O6(GCA_000264555.1)	18	90.0	S:COG3657				Uncharacterized protein HI_1419
1810	GCA_000264555.1_01431	Pseudomonas chlororaphis subsp. aureofaciens O6(GCA_000264555.1)	19	95.0	S:COG3422	K09946			UPF0339 protein SO_3888	Repeat.	Belongs to the UPF0339 family. Duplicated subfamily.
1811	GCA_000264555.1_02979	Pseudomonas chlororaphis subsp. aureofaciens O6(GCA_000264555.1)	20	100.0			Carbohydrates Di- and oligosaccharides Maltose_and_Maltodextrin_Utilization Malto-oligosyltrehalose synthase (EC 5.4.99.15)		hypothetical protein
1812	GCA_000698865.1_03461	Pseudomonas chlororaphis subsp. aureofaciens PA23(GCA_000698865.1)	1	5.0					hypothetical protein
1813	GCA_000264555.1_01760	Pseudomonas chlororaphis subsp. aureofaciens O6(GCA_000264555.1)	20	100.0	S:ENOG410XWA4				hypothetical protein
1814	GCA_003850365.1_03783	Pseudomonas chlororaphis subsp. piscium ATCC 17809(GCA_003850365.1)	1	5.0	S:ENOG41121Y5				hypothetical protein
1815	GCA_000264555.1_00782	Pseudomonas chlororaphis subsp. aureofaciens O6(GCA_000264555.1)	19	95.0	S:ENOG410YNZK				hypothetical protein
1816	GCA_003850365.1_01276	Pseudomonas chlororaphis subsp. piscium ATCC 17809(GCA_003850365.1)	1	5.0					hypothetical protein
1817	GCA_001921865.1_00522	MSCT_s PCL1601(GCA_001921865.1)	1	5.0					hypothetical protein
1818	GCA_000264555.1_04424	Pseudomonas chlororaphis subsp. aureofaciens O6(GCA_000264555.1)	20	100.0	L:COG1555	K02237	DNA Metabolism DNA uptake, competence Gram_Positive_Competence Late competence protein ComEA, DNA receptor	GO:0003677,GO:0006281	Uncharacterized protein HI_1008	Repeat
1819	GCA_000264555.1_00400	Pseudomonas chlororaphis subsp. aureofaciens O6(GCA_000264555.1)	9	45.0	S:ENOG41123EG	K19092			toxin ParE1/3/4
1820	GCA_003851835.1_03599	Pseudomonas chlororaphis subsp. aurantiaca DSM 19603(Type)(GCA_003851835.1)	1	5.0					hypothetical protein
1821	GCA_000264555.1_04462	Pseudomonas chlororaphis subsp. aureofaciens O6(GCA_000264555.1)	19	95.0	S:COG1742	K09771		GO:0016021,GO:0005886	UPF0060 membrane protein PSPPH_1503	Cell inner membrane
1822	GCA_003851495.1_04210	Pseudomonas synxantha 2-79(GCA_003851495.1)	1	5.0					hypothetical protein
1823	GCA_003851905.1_03487	Pseudomonas chlororaphis subsp. aureofaciens DSM 6698(Type)(GCA_003851905.1)	1	5.0					hypothetical protein
1824	GCA_003851405.1_00794	Pseudomonas chlororaphis subsp. aureofaciens 66(GCA_003851405.1)	3	15.0	L:ENOG4111UZ8	K07484			hypothetical protein
1825	GCA_003851925.1_03214	Pseudomonas chlororaphis subsp. aureofaciens ChPhzTR39(GCA_003851925.1)	1	5.0					hypothetical protein
1826	GCA_000264555.1_05070	Pseudomonas chlororaphis subsp. aureofaciens O6(GCA_000264555.1)	20	100.0	C:COG3125	K02300	Respiration Electron accepting reactions Terminal_cytochrome_oxidases Cytochrome O ubiquinol oxidase subunit IV (EC 1.10.3.-)	GO:0016021,GO:0005886,GO:0008827,GO:0015990	Cytochrome bo(3) ubiquinol oxidase subunit 4	Cell inner membrane
1827	GCA_000264555.1_05289	Pseudomonas chlororaphis subsp. aureofaciens O6(GCA_000264555.1)	20	100.0	S:COG3098	K06175		GO:0009982,GO:0003723,GO:0001522,GO:0008033	tRNA pseudouridine(65) synthase	Isomerase
1828	GCA_000264555.1_00990	Pseudomonas chlororaphis subsp. aureofaciens O6(GCA_000264555.1)	4	20.0					hypothetical protein
1829	GCA_000264555.1_03962	Pseudomonas chlororaphis subsp. aureofaciens O6(GCA_000264555.1)	20	100.0					hypothetical protein
1830	GCA_003850565.1_01880	CP027706_s CMR12a(GCA_003850565.1)	1	5.0					hypothetical protein
1831	GCA_003850565.1_03473	CP027706_s CMR12a(GCA_003850565.1)	2	10.0	S:COG4679				hypothetical protein
1832	GCA_000264555.1_03079	Pseudomonas chlororaphis subsp. aureofaciens O6(GCA_000264555.1)	18	90.0	S:ENOG410YUCF				hypothetical protein
1833	GCA_000264555.1_05080	Pseudomonas chlororaphis subsp. aureofaciens O6(GCA_000264555.1)	19	95.0	S:ENOG41122MA				hypothetical protein
1834	GCA_003850565.1_02844	CP027706_s CMR12a(GCA_003850565.1)	1	5.0	K:ENOG410XRYC	K05798	Amino Acids and Derivatives Branched-chain amino acids Leucine_Biosynthesis Probable transcriptional activator for leuABCD operon	GO:0003677,GO:0003700,GO:0009877,GO:0006351	HTH-type transcriptional regulator SyrM	Activator
1835	GCA_000264555.1_05013	Pseudomonas chlororaphis subsp. aureofaciens O6(GCA_000264555.1)	20	100.0	U:COG1862	K03210		GO:0016021,GO:0005886	UPF0092 membrane protein BUsg_126	Cell membrane
1836	GCA_003851495.1_02440	Pseudomonas synxantha 2-79(GCA_003851495.1)	1	5.0					hypothetical protein
1837	GCA_000264555.1_00141	Pseudomonas chlororaphis subsp. aureofaciens O6(GCA_000264555.1)	20	100.0	S:ENOG410XY7C				hypothetical protein
1838	GCA_000264555.1_02697	Pseudomonas chlororaphis subsp. aureofaciens O6(GCA_000264555.1)	17	85.0	S:ENOG410ZC9C				hypothetical protein
1839	GCA_000264555.1_03970	Pseudomonas chlororaphis subsp. aureofaciens O6(GCA_000264555.1)	20	100.0	P:COG2920	K11179	Clustering-based subsystems Translation CBSS-326442.4.peg.1852 tRNA 2-thiouridine synthesizing protein E (EC 2.8.1.-)	GO:0005737,GO:0016740,GO:0008033	Sulfurtransferase TusE	Cytoplasm
1840	GCA_000264555.1_01235	Pseudomonas chlororaphis subsp. aureofaciens O6(GCA_000264555.1)	1	5.0	V:COG1403	K07451	Phages, Prophages, Transposable elements Bacteriophage integration/excision/lysogeny Phage_integration_and_excision Phage endonuclease		5-methylcytosine-specific restriction enzyme A		KEGG: pamg:BKM19_016825 5-methylcytosine-specific restriction enzyme A
1841	GCA_000281915.1_02670	Pseudomonas chlororaphis subsp. chlororaphis 30-84(GCA_000281915.1)	10	50.0	S:ENOG410Y1FF				hypothetical protein
1842	GCA_003850365.1_03138	Pseudomonas chlororaphis subsp. piscium ATCC 17809(GCA_003850365.1)	3	15.0					hypothetical protein
1843	GCA_003851205.1_03130	Pseudomonas chlororaphis subsp. aurantiaca 449(GCA_003851205.1)	4	20.0	L:COG2963	K07483		GO:0003677,GO:0004803,GO:0006313	Putative transposase YkgN		Belongs to the transposase 8 family.
1844	GCA_003851495.1_01897	Pseudomonas synxantha 2-79(GCA_003851495.1)	1	5.0	K:ENOG4112DFI				hypothetical protein
1845	GCA_003851165.1_01874	Pseudomonas chlororaphis subsp. aurantiaca M12(GCA_003851165.1)	1	5.0					hypothetical protein
1846	GCA_000264555.1_06014	Pseudomonas chlororaphis subsp. aureofaciens O6(GCA_000264555.1)	20	100.0	E:COG0347	K04752	Nitrogen Metabolism null Ammonia_assimilation Nitrogen regulatory protein P-II	GO:0030234,GO:0000166,GO:0006808,GO:0006355,GO:0006351	Nitrogen regulatory protein P-II	Nucleotide-binding
1847	GCA_000264555.1_00951	Pseudomonas chlororaphis subsp. aureofaciens O6(GCA_000264555.1)	20	100.0	S:ENOG4111TSQ				hypothetical protein
1848	GCA_000264555.1_02158	Pseudomonas chlororaphis subsp. aureofaciens O6(GCA_000264555.1)	6	30.0	S:COG4718		Phages, Prophages, Transposable elements, Plasmids Phages, Prophages Phage_tail_proteins_2 Phage minor tail protein	GO:0030430,GO:0019012	Tail tip protein M	Host cytoplasm
1849	GCA_000264555.1_05638	Pseudomonas chlororaphis subsp. aureofaciens O6(GCA_000264555.1)	20	100.0	FG:COG0537	K02503	Nucleosides and Nucleotides Pyrimidines pyrimidine_conversions Bis(5'-nucleosyl)-tetraphosphatase (asymmetrical) (EC 3.6.1.17)	GO:0003824	Uncharacterized HIT-like protein TC_0664		Contains 1 HIT domain.
1850	GCA_000264555.1_02411	Pseudomonas chlororaphis subsp. aureofaciens O6(GCA_000264555.1)	10	50.0	S:COG3668	K19092			toxin ParE1/3/4
1851	GCA_003850365.1_02471	Pseudomonas chlororaphis subsp. piscium ATCC 17809(GCA_003850365.1)	1	5.0					hypothetical protein
1852	GCA_000264555.1_02448	Pseudomonas chlororaphis subsp. aureofaciens O6(GCA_000264555.1)	16	80.0	S:ENOG410Y436				hypothetical protein
1853	GCA_000264555.1_02019	Pseudomonas chlororaphis subsp. aureofaciens O6(GCA_000264555.1)	20	100.0	S:COG0718	K09747	DNA Metabolism DNA uptake, competence DNA_processing_cluster FIG000557: hypothetical protein co-occurring with RecR	GO:0043590,GO:0005737,GO:0003677	Nucleoid-associated protein PA1533	Cytoplasm
1854	GCA_000264555.1_02535	Pseudomonas chlororaphis subsp. aureofaciens O6(GCA_000264555.1)	20	100.0	O:COG0545	K01802	RNA Metabolism RNA processing and modification Queuosine-Archaeosine_Biosynthesis Peptidyl-prolyl cis-trans isomerase (EC 5.2.1.8)	GO:0044295,GO:0005829,GO:0005874,GO:0005739,GO:0005634,GO:0005528,GO:0003755,GO:0061077,GO:0031111,GO:0010977	Peptidylprolyl isomerase	Acetylation				KEGG: pae:PA3717 peptidylprolyl isomerase"
1855	GCA_000264555.1_04907	Pseudomonas chlororaphis subsp. aureofaciens O6(GCA_000264555.1)	20	100.0	O:COG0278	K07390	Stress Response Oxidative stress Glutaredoxins Glutaredoxin-related protein	GO:0005623,GO:0051537,GO:0009055,GO:0046872,GO:0015035,GO:0045454	Probable monothiol glutaredoxin-2	2Fe-2S
1856	GCA_000264555.1_01251	Pseudomonas chlororaphis subsp. aureofaciens O6(GCA_000264555.1)	1	5.0	S:COG4718		Phages, Prophages, Transposable elements, Plasmids Phages, Prophages Phage_tail_proteins_2 Phage minor tail protein	GO:0030430,GO:0019012,GO:0019076	Tail tip protein M	Host cytoplasm
1857	GCA_000264555.1_04923	Pseudomonas chlororaphis subsp. aureofaciens O6(GCA_000264555.1)	20	100.0	S:COG3136	K02442		GO:0016021,GO:0005886	Inner membrane protein YdgC	Cell inner membrane
1858	GCA_003851925.1_05394	Pseudomonas chlororaphis subsp. aureofaciens ChPhzTR39(GCA_003851925.1)	1	5.0		K00483	Metabolism of Aromatic Compounds null Aromatic_Amin_Catabolism 4-hydroxyphenylacetate 3-monooxygenase (EC 1.14.13.3)	GO:0018601,GO:0016627,GO:0019439	4-hydroxyphenylacetate 3-monooxygenase	Aromatic hydrocarbons catabolism
1859	GCA_003851495.1_01499	Pseudomonas synxantha 2-79(GCA_003851495.1)	1	5.0	C:COG3125	K02300	Respiration Electron accepting reactions Terminal_cytochrome_oxidases Cytochrome O ubiquinol oxidase subunit IV (EC 1.10.3.-)	GO:0016021,GO:0005886,GO:0008827,GO:0015990	Cytochrome bo(3) ubiquinol oxidase subunit	Cell inner membrane
1860	GCA_003850565.1_02285	CP027706_s CMR12a(GCA_003850565.1)	1	5.0	S:ENOG410XYKE				hypothetical protein
1861	GCA_000264555.1_02601	Pseudomonas chlororaphis subsp. aureofaciens O6(GCA_000264555.1)	19	95.0	S:ENOG410Y8QZ	K03646			hypothetical protein
1862	GCA_003851495.1_02941	Pseudomonas synxantha 2-79(GCA_003851495.1)	1	5.0					hypothetical protein
1863	GCA_000963835.1_04202	CP010892_s PCL1606(GCA_000963835.1)	1	5.0					hypothetical protein
1864	GCA_000264555.1_06100	Pseudomonas chlororaphis subsp. aureofaciens O6(GCA_000264555.1)	10	50.0					hypothetical protein
1865	GCA_000281915.1_02803	Pseudomonas chlororaphis subsp. chlororaphis 30-84(GCA_000281915.1)	3	15.0	S:ENOG410ZKWE				hypothetical protein
1866	GCA_000264555.1_04041	Pseudomonas chlororaphis subsp. aureofaciens O6(GCA_000264555.1)	20	100.0					hypothetical protein
1867	GCA_003851495.1_02661	Pseudomonas synxantha 2-79(GCA_003851495.1)	1	5.0	S:COG1359	K01607			4-carboxymuconolactone decarboxylase		KEGG: pdi:BDI_0712 4-carboxymuconolactone decarboxylase
1868	GCA_000264555.1_01456	Pseudomonas chlororaphis subsp. aureofaciens O6(GCA_000264555.1)	20	100.0	S:ENOG4112A3D				hypothetical protein
1869	GCA_000264555.1_01941	Pseudomonas chlororaphis subsp. aureofaciens O6(GCA_000264555.1)	20	100.0	S:ENOG410Y355		Clustering-based subsystems null CBSS-316273.3.peg.2709 Superfamily II DNA/RNA helicases, SNF2 family		hypothetical protein
1870	GCA_000264555.1_03411	Pseudomonas chlororaphis subsp. aureofaciens O6(GCA_000264555.1)	18	90.0	S:COG3450	K06995			uncharacterized protein
1871	GCA_003851925.1_03439	Pseudomonas chlororaphis subsp. aureofaciens ChPhzTR39(GCA_003851925.1)	1	5.0	G:COG3469	K01183	Carbohydrates Aminosugars Chitin_and_N-acetylglucosamine_utilization Chitinase (EC 3.2.1.14)		Chitinase		KEGG: pfo:Pfl01_3568 chitinase
1872	GCA_000264555.1_01381	Pseudomonas chlororaphis subsp. aureofaciens O6(GCA_000264555.1)	20	100.0			Amino Acids and Derivatives Lysine, threonine, methionine, and cysteine Lysine_Biosynthesis_DAP_Pathway Aspartate-semialdehyde dehydrogenase (EC 1.2.1.11)		hypothetical protein
1873	GCA_000264555.1_04353	Pseudomonas chlororaphis subsp. aureofaciens O6(GCA_000264555.1)	20	100.0					hypothetical protein
1874	GCA_003851165.1_01879	Pseudomonas chlororaphis subsp. aurantiaca M12(GCA_003851165.1)	1	5.0					hypothetical protein
1875	GCA_001921865.1_01427	MSCT_s PCL1601(GCA_001921865.1)	1	5.0					hypothetical protein
1876	GCA_003851345.1_02844	Pseudomonas chlororaphis subsp. aurantiaca Q16(GCA_003851345.1)	1	5.0					hypothetical protein
1877	GCA_000264555.1_03016	Pseudomonas chlororaphis subsp. aureofaciens O6(GCA_000264555.1)	20	100.0	S:ENOG4111YJW		Carbohydrates Fermentation Acetyl-CoA_fermentation_to_Butyrate Electron transfer flavoprotein, beta subunit		hypothetical protein
1878	GCA_000264555.1_05241	Pseudomonas chlororaphis subsp. aureofaciens O6(GCA_000264555.1)	17	85.0	S:ENOG4111UMS	K09137			uncharacterized protein
1879	GCA_000963835.1_00292	CP010892_s PCL1606(GCA_000963835.1)	5	25.0	S:COG0599	K01607		GO:0051920	4-carboxymuconolactone decarboxylase		KEGG: lsa:LCA_1776 4-carboxymuconolactone decarboxylase
1880	GCA_003851495.1_00722	Pseudomonas synxantha 2-79(GCA_003851495.1)	1	5.0	S:COG2361	K07075	Phages, Prophages, Transposable elements, Plasmids Transposable elements CBSS-203122.12.peg.188 Predicted nucleotidyltransferases		UPF0331 protein		Belongs to the UPF0331 family.
1881	GCA_000264555.1_04126	Pseudomonas chlororaphis subsp. aureofaciens O6(GCA_000264555.1)	16	80.0	E:COG1171	K01751	Amino Acids and Derivatives Lysine, threonine, methionine, and cysteine Threonine_degradation Threonine dehydratase (EC 4.3.1.19)		Diaminopropionate ammonia-lyase		KEGG: ppg:PputGB1_2576 diaminopropionate ammonia-lyase
1882	GCA_000264555.1_04687	Pseudomonas chlororaphis subsp. aureofaciens O6(GCA_000264555.1)	14	70.0	S:COG3668				hypothetical protein
1883	GCA_000264555.1_01215	Pseudomonas chlororaphis subsp. aureofaciens O6(GCA_000264555.1)	1	5.0					hypothetical protein
1884	GCA_003850565.1_00006	CP027706_s CMR12a(GCA_003850565.1)	1	5.0					hypothetical protein
1885	GCA_000264555.1_05377	Pseudomonas chlororaphis subsp. aureofaciens O6(GCA_000264555.1)	20	100.0	P:COG2824	K06193	Phosphorus Metabolism null Alkylphosphonate_utilization Alkylphosphonate utilization operon protein PhnA		Protein PhnA
1886	GCA_003850365.1_03080	Pseudomonas chlororaphis subsp. piscium ATCC 17809(GCA_003850365.1)	1	5.0	P:COG1629	K02014	Membrane Transport null Ton_and_Tol_transport_systems TonB-dependent receptor		hypothetical protein
1887	GCA_000264555.1_05000	Pseudomonas chlororaphis subsp. aureofaciens O6(GCA_000264555.1)	20	100.0	C:COG0633	K04755	Respiration null Soluble_cytochromes_and_functionally_related_electron_carriers Ferredoxin, 2Fe-2S	GO:0051537,GO:0009055,GO:0046872,GO:0055114	2Fe-2S ferredoxin	2Fe-2S
1888	GCA_003850565.1_05911	CP027706_s CMR12a(GCA_003850565.1)	1	5.0	S:ENOG4111VQP				hypothetical protein
1889	GCA_000264555.1_02723	Pseudomonas chlororaphis subsp. aureofaciens O6(GCA_000264555.1)	16	80.0	S:ENOG411206E				hypothetical protein
1890	GCA_000264555.1_02728	Pseudomonas chlororaphis subsp. aureofaciens O6(GCA_000264555.1)	12	60.0	S:ENOG410ZC84				hypothetical protein
1891	GCA_000264555.1_01138	Pseudomonas chlororaphis subsp. aureofaciens O6(GCA_000264555.1)	20	100.0	S:ENOG4111U84				hypothetical protein
1892	GCA_000264555.1_05293	Pseudomonas chlororaphis subsp. aureofaciens O6(GCA_000264555.1)	20	100.0	S:COG1357				hypothetical protein
1893	GCA_003851265.1_00364	Pseudomonas chlororaphis subsp. aurantiaca M71(GCA_003851265.1)	1	5.0					hypothetical protein
1894	GCA_003850565.1_03083	CP027706_s CMR12a(GCA_003850565.1)	1	5.0					hypothetical protein
1895	GCA_003851495.1_04311	Pseudomonas synxantha 2-79(GCA_003851495.1)	1	5.0					hypothetical protein
1896	GCA_000264555.1_03142	Pseudomonas chlororaphis subsp. aureofaciens O6(GCA_000264555.1)	20	100.0	EG:COG0697	K12962	Cell Wall and Capsule Gram-Negative cell wall components Lipid_A-Ara4N_pathway_(_Polymyxin_resistance_) Polymyxin resistance protein PmrL, sucrose-6 phosphate hydrolase	GO:0005887,GO:0022891,GO:0009245,GO:0009103	Probable 4-amino-4-deoxy-L-arabinose-phosphoundecaprenol flippase subunit ArnE	Cell inner membrane
1897	GCA_003851205.1_01858	Pseudomonas chlororaphis subsp. aurantiaca 449(GCA_003851205.1)	1	5.0	S:COG3628	K06903		GO:0019012,GO:0019076	Baseplate protein W	Late protein
1898	GCA_000264555.1_04303	Pseudomonas chlororaphis subsp. aureofaciens O6(GCA_000264555.1)	20	100.0	S:ENOG4112APR		Iron acquisition and metabolism Siderophores Siderophore_Pyoverdine Hypothetical protein in pyoverdin gene cluster, PA2405 homolog		hypothetical protein
1899	GCA_000264555.1_02638	Pseudomonas chlororaphis subsp. aureofaciens O6(GCA_000264555.1)	20	100.0	P:COG1006	K05560	Membrane Transport Uni- Sym- and Antiporters Sodium_Hydrogen_Antiporter Na(+) H(+) antiporter subunit C	GO:0016021,GO:0005886,GO:0015297,GO:0008324,GO:0016651,GO:0042773,GO:0006813,GO:0015992	Probable K(+)/H(+) antiporter subunit C	Antiport
1900	GCA_000264555.1_00790	Pseudomonas chlororaphis subsp. aureofaciens O6(GCA_000264555.1)	19	95.0					hypothetical protein
1901	GCA_003851785.1_04129	Pseudomonas chlororaphis subsp. aureofaciens Pb-St2(GCA_003851785.1)	1	5.0	M:COG1209	K00973	Cell Wall and Capsule Capsular and extracellular polysacchrides dTDP-rhamnose_synthesis Glucose-1-phosphate thymidylyltransferase (EC 2.7.7.24)	GO:0005829,GO:0008879,GO:0042802,GO:0046872,GO:0019305,GO:0045226,GO:0009243	Glucose-1-phosphate thymidylyltransferase	Lipopolysaccharide biosynthesis
1902	GCA_003851405.1_00799	Pseudomonas chlororaphis subsp. aureofaciens 66(GCA_003851405.1)	1	5.0					hypothetical protein
1903	GCA_003850565.1_02982	CP027706_s CMR12a(GCA_003850565.1)	1	5.0	S:ENOG411212M		Clustering-based subsystems null PA0057_cluster Metallo-beta-lactamase superfamily protein PA0057		hypothetical protein
1904	GCA_000698865.1_05451	Pseudomonas chlororaphis subsp. aureofaciens PA23(GCA_000698865.1)	1	5.0					hypothetical protein
1905	GCA_000264555.1_04683	Pseudomonas chlororaphis subsp. aureofaciens O6(GCA_000264555.1)	20	100.0	S:COG3795	K04750	Phosphorus Metabolism null Alkylphosphonate_utilization PhnB protein		Uncharacterized protein R00369
1906	GCA_000264555.1_01999	Pseudomonas chlororaphis subsp. aureofaciens O6(GCA_000264555.1)	20	100.0	S:COG3171	K09923		GO:0005829	Uncharacterized protein YggL		To H.influenzae HI_0341.
1907	GCA_000264555.1_04318	Pseudomonas chlororaphis subsp. aureofaciens O6(GCA_000264555.1)	18	90.0					hypothetical protein
1908	GCA_003850565.1_03088	CP027706_s CMR12a(GCA_003850565.1)	1	5.0					hypothetical protein
1909	GCA_003850565.1_01474	CP027706_s CMR12a(GCA_003850565.1)	1	5.0	S:ENOG410YYPY				hypothetical protein
1910	GCA_003851495.1_04268	Pseudomonas synxantha 2-79(GCA_003851495.1)	2	10.0	L:ENOG4111NDY	K07484			uncharacterized protein	Plasmid.	Belongs to the transposase 34 family.
1911	GCA_003850565.1_01476	CP027706_s CMR12a(GCA_003850565.1)	1	5.0					hypothetical protein
1912	GCA_003850565.1_01493	CP027706_s CMR12a(GCA_003850565.1)	4	20.0	S:ENOG410XWKY				hypothetical protein
1913	GCA_000264555.1_01737	Pseudomonas chlororaphis subsp. aureofaciens O6(GCA_000264555.1)	20	100.0	T:COG2198	K20976			hypothetical protein
1914	GCA_000698865.1_04754	Pseudomonas chlororaphis subsp. aureofaciens PA23(GCA_000698865.1)	5	25.0	S:ENOG4111IH5				hypothetical protein
1915	GCA_003851495.1_01242	Pseudomonas synxantha 2-79(GCA_003851495.1)	1	5.0					hypothetical protein
1916	GCA_001921865.1_02686	MSCT_s PCL1601(GCA_001921865.1)	1	5.0	S:ENOG410Y0XP		Virulence, Disease and Defense Resistance to antibiotics and toxic compounds Lysozyme_inhibitors Membrane-bound lysozyme inhibitor of c-type lysozyme	GO:0009279	Membrane-bound lysozyme inhibitor of C-type lysozyme	Cell outer membrane
1917	GCA_003850445.1_00336	Pseudomonas chlororaphis subsp. piscium PCL1391(GCA_003850445.1)	1	5.0					hypothetical protein
1918	GCA_000264555.1_01284	Pseudomonas chlororaphis subsp. aureofaciens O6(GCA_000264555.1)	19	95.0	S:ENOG4111Q95				hypothetical protein
1919	GCA_003851495.1_04209	Pseudomonas synxantha 2-79(GCA_003851495.1)	1	5.0					hypothetical protein
1920	GCA_000264555.1_02914	Pseudomonas chlororaphis subsp. aureofaciens O6(GCA_000264555.1)	19	95.0	S:ENOG41127ZT				hypothetical protein
1921	GCA_003851205.1_04095	Pseudomonas chlororaphis subsp. aurantiaca 449(GCA_003851205.1)	5	25.0					hypothetical protein
1922	GCA_000264555.1_00463	Pseudomonas chlororaphis subsp. aureofaciens O6(GCA_000264555.1)	19	95.0	S:COG3111		Cofactors, Vitamins, Prosthetic Groups, Pigments Folate and pterines Molybdenum_cofactor_biosynthesis Protein co-occuring with molybdenum cofactor biosynthesis protein B		hypothetical protein
1923	GCA_000264555.1_01249	Pseudomonas chlororaphis subsp. aureofaciens O6(GCA_000264555.1)	1	5.0					hypothetical protein
1924	GCA_000264555.1_01513	Pseudomonas chlororaphis subsp. aureofaciens O6(GCA_000264555.1)	10	50.0					hypothetical protein
1925	GCA_001921865.1_05618	MSCT_s PCL1601(GCA_001921865.1)	1	5.0					hypothetical protein
1926	GCA_000264555.1_02870	Pseudomonas chlororaphis subsp. aureofaciens O6(GCA_000264555.1)	19	95.0	K:COG0640	K03892	Virulence, Disease and Defense Resistance to antibiotics and toxic compounds Arsenic_resistance Arsenical resistance operon repressor	GO:0005622,GO:0003677,GO:0003700,GO:0046685,GO:0006351	Arsenical resistance operon repressor	Arsenical resistance
1927	GCA_000264555.1_02760	Pseudomonas chlororaphis subsp. aureofaciens O6(GCA_000264555.1)	2	10.0	K:COG1396				hypothetical protein
1928	GCA_003850565.1_01200	CP027706_s CMR12a(GCA_003850565.1)	2	10.0	S:ENOG410Z17A				hypothetical protein
1929	GCA_000264555.1_02539	Pseudomonas chlororaphis subsp. aureofaciens O6(GCA_000264555.1)	19	95.0	S:COG2329				hypothetical protein
1930	GCA_000264555.1_01839	Pseudomonas chlororaphis subsp. aureofaciens O6(GCA_000264555.1)	20	100.0	S:ENOG410Y1TH				hypothetical protein
1931	GCA_000264555.1_06065	Pseudomonas chlororaphis subsp. aureofaciens O6(GCA_000264555.1)	1	5.0					hypothetical protein
1932	GCA_003851495.1_02488	Pseudomonas synxantha 2-79(GCA_003851495.1)	1	5.0	S:ENOG410Y3TP				hypothetical protein
1933	GCA_003851785.1_02031	Pseudomonas chlororaphis subsp. aureofaciens Pb-St2(GCA_003851785.1)	1	5.0					hypothetical protein
1934	GCA_000264555.1_01265	Pseudomonas chlororaphis subsp. aureofaciens O6(GCA_000264555.1)	20	100.0					hypothetical protein
1935	GCA_000264555.1_00232	Pseudomonas chlororaphis subsp. aureofaciens O6(GCA_000264555.1)	5	25.0					hypothetical protein
1936	GCA_000264555.1_01519	Pseudomonas chlororaphis subsp. aureofaciens O6(GCA_000264555.1)	7	35.0	S:ENOG41123ZW				hypothetical protein
1937	GCA_003851925.1_02847	Pseudomonas chlororaphis subsp. aureofaciens ChPhzTR39(GCA_003851925.1)	1	5.0					hypothetical protein
1938	GCA_003850465.1_00647	Pseudomonas chlororaphis subsp. piscium PCL1607(GCA_003850465.1)	2	10.0	S:COG4381			GO:0030430,GO:0019012,GO:0019076	Baseplate protein gp46	Host cytoplasm
1939	GCA_000264555.1_03532	Pseudomonas chlororaphis subsp. aureofaciens O6(GCA_000264555.1)	20	100.0					hypothetical protein
1940	GCA_000264555.1_01093	Pseudomonas chlororaphis subsp. aureofaciens O6(GCA_000264555.1)	20	100.0	J:COG0335	K02884	Protein Metabolism Protein biosynthesis Ribosome_LSU_bacterial LSU ribosomal protein L19p	GO:0005840,GO:0003735,GO:0006412	50S ribosomal protein L19	Ribonucleoprotein
1941	GCA_000264555.1_06218	Pseudomonas chlororaphis subsp. aureofaciens O6(GCA_000264555.1)	14	70.0	K:ENOG410XWV4				hypothetical protein
1942	GCA_000963835.1_05765	CP010892_s PCL1606(GCA_000963835.1)	2	10.0					hypothetical protein
1943	GCA_003851925.1_04496	Pseudomonas chlororaphis subsp. aureofaciens ChPhzTR39(GCA_003851925.1)	1	5.0	S:COG3384	K15777		GO:0005737,GO:0005886,GO:0008198,GO:0050297,GO:0008270,GO:0006725	4,5-DOPA dioxygenase extradiol	Cytoplasm
1944	GCA_003851785.1_03543	Pseudomonas chlororaphis subsp. aureofaciens Pb-St2(GCA_003851785.1)	1	5.0					hypothetical protein
1945	GCA_003851495.1_00317	Pseudomonas synxantha 2-79(GCA_003851495.1)	1	5.0	K:ENOG410XUC3				hypothetical protein
1946	GCA_003850565.1_02517	CP027706_s CMR12a(GCA_003850565.1)	1	5.0	S:COG3339				hypothetical protein
1947	GCA_000264555.1_02233	Pseudomonas chlororaphis subsp. aureofaciens O6(GCA_000264555.1)	20	100.0	S:ENOG410Z9ID				hypothetical protein
1948	GCA_000264555.1_05632	Pseudomonas chlororaphis subsp. aureofaciens O6(GCA_000264555.1)	20	100.0	S:COG0316	K15724	Clustering-based subsystems null CBSS-316273.3.peg.922 probable iron binding protein from the HesB_IscA_SufA family	GO:0005506,GO:0051536,GO:0005198,GO:0016226	Iron-sulfur cluster insertion protein ErpA	Iron
1949	GCA_000264555.1_00983	Pseudomonas chlororaphis subsp. aureofaciens O6(GCA_000264555.1)	20	100.0	S:COG3141	K09918			uncharacterized protein
1950	GCA_003850565.1_02254	CP027706_s CMR12a(GCA_003850565.1)	1	5.0	J:COG1670	K03790	DNA Metabolism DNA repair DNA_Repair_Base_Excision DNA-3-methyladenine glycosylase (EC 3.2.2.20)	GO:0008080	[Ribosomal protein S5]-alanine N-acetyltransferase		Contains 1 N-acetyltransferase domain.
1951	GCA_003850565.1_05154	CP027706_s CMR12a(GCA_003850565.1)	1	5.0	S:ENOG4111W2V				hypothetical protein
1952	GCA_000264555.1_00754	Pseudomonas chlororaphis subsp. aureofaciens O6(GCA_000264555.1)	20	100.0	S:COG3450	K06995			uncharacterized protein
1953	GCA_000963835.1_00463	CP010892_s PCL1606(GCA_000963835.1)	1	5.0	S:ENOG411295X				hypothetical protein
1954	GCA_003850365.1_05317	Pseudomonas chlororaphis subsp. piscium ATCC 17809(GCA_003850365.1)	1	5.0	K:COG3070	K07343			hypothetical protein
1955	GCA_003851495.1_00754	Pseudomonas synxantha 2-79(GCA_003851495.1)	1	5.0	S:ENOG410ZF3H				hypothetical protein
1956	GCA_003850445.1_02551	Pseudomonas chlororaphis subsp. piscium PCL1391(GCA_003850445.1)	4	20.0					hypothetical protein
1957	GCA_000264555.1_04177	Pseudomonas chlororaphis subsp. aureofaciens O6(GCA_000264555.1)	18	90.0	S:COG2823	K04065	Stress Response Osmotic stress Osmoregulation Osmotically inducible protein OsmY		hyperosmotically inducible periplasmic protein
1958	GCA_000264555.1_05811	Pseudomonas chlororaphis subsp. aureofaciens O6(GCA_000264555.1)	20	100.0	J:COG0251	K09022			2-iminobutanoate/2-iminopropanoate deaminase		KEGG: tes:BW730_03715 2-iminobutanoate/2-iminopropanoate deaminase
1959	GCA_000264555.1_05589	Pseudomonas chlororaphis subsp. aureofaciens O6(GCA_000264555.1)	20	100.0	J:COG0256	K02881	Protein Metabolism Protein biosynthesis Ribosome_LSU_bacterial LSU ribosomal protein L18p (L5e)	GO:0005840,GO:0019843,GO:0003735,GO:0006412	50S ribosomal protein L18	Ribonucleoprotein
1960	GCA_000264555.1_05556	Pseudomonas chlororaphis subsp. aureofaciens O6(GCA_000264555.1)	20	100.0					hypothetical protein
1961	GCA_000264555.1_06097	Pseudomonas chlororaphis subsp. aureofaciens O6(GCA_000264555.1)	1	5.0	S:ENOG410ZHKJ				hypothetical protein
1962	GCA_000281915.1_03326	Pseudomonas chlororaphis subsp. chlororaphis 30-84(GCA_000281915.1)	1	5.0	K:COG1733	K03098	Carbohydrates One-carbon Metabolism Formaldehyde_assimilation:_Ribulose_monophosphate_pathway Transcriptional regulator HxlR, formaldehyde assimilation	GO:0003677,GO:0006355,GO:0006351	Uncharacterized HTH-type transcriptional regulator MTH_1285	DNA-binding
1963	GCA_003851905.1_00275	Pseudomonas chlororaphis subsp. aureofaciens DSM 6698(Type)(GCA_003851905.1)	1	5.0	S:ENOG4111IYQ	K00088	Clustering-based subsystems Fatty acid metabolic cluster CBSS-246196.1.peg.364 3-oxoacyl-[acyl-carrier protein] reductase (EC 1.1.1.100)		IMP dehydrogenase		KEGG: obt:OPIT5_29135 IMP dehydrogenase
1964	GCA_000264555.1_02176	Pseudomonas chlororaphis subsp. aureofaciens O6(GCA_000264555.1)	1	5.0	S:ENOG410Z4V7				hypothetical protein
1965	GCA_000264555.1_02781	Pseudomonas chlororaphis subsp. aureofaciens O6(GCA_000264555.1)	19	95.0	S:ENOG410Y89D				hypothetical protein
1966	GCA_000264555.1_05387	Pseudomonas chlororaphis subsp. aureofaciens O6(GCA_000264555.1)	20	100.0	S:ENOG410ZEIX				hypothetical protein
1967	GCA_000264555.1_05673	Pseudomonas chlororaphis subsp. aureofaciens O6(GCA_000264555.1)	20	100.0	H:COG1539	K01633	Cofactors, Vitamins, Prosthetic Groups, Pigments Folate and pterines Folate_Biosynthesis Dihydroneopterin aldolase (EC 4.1.2.25)	GO:0004150,GO:0046656,GO:0046654	Dihydroneopterin aldolase	Folate biosynthesis
1968	GCA_000963835.1_03448	CP010892_s PCL1606(GCA_000963835.1)	1	5.0					hypothetical protein
1969	GCA_003850365.1_03467	Pseudomonas chlororaphis subsp. piscium ATCC 17809(GCA_003850365.1)	4	20.0					hypothetical protein
1970	GCA_000264555.1_01055	Pseudomonas chlororaphis subsp. aureofaciens O6(GCA_000264555.1)	20	100.0	O:ENOG410Y8KE	K06191	Stress Response Oxidative stress Glutathione:_Redox_cycle Glutaredoxin		glutaredoxin-like protein NrdH
1971	GCA_000264555.1_03949	Pseudomonas chlororaphis subsp. aureofaciens O6(GCA_000264555.1)	18	90.0					hypothetical protein
1972	GCA_000264555.1_06119	Pseudomonas chlororaphis subsp. aureofaciens O6(GCA_000264555.1)	20	100.0	S:COG0727	K06940			uncharacterized protein
1973	GCA_000264555.1_02828	Pseudomonas chlororaphis subsp. aureofaciens O6(GCA_000264555.1)	20	100.0	S:ENOG410XQ9U				hypothetical protein
1974	GCA_003851495.1_04925	Pseudomonas synxantha 2-79(GCA_003851495.1)	1	5.0	S:ENOG4112CD5				hypothetical protein
1975	GCA_000281915.1_00439	Pseudomonas chlororaphis subsp. chlororaphis 30-84(GCA_000281915.1)	14	70.0	S:ENOG410XYDE				hypothetical protein
1976	GCA_003851785.1_00228	Pseudomonas chlororaphis subsp. aureofaciens Pb-St2(GCA_003851785.1)	1	5.0	M:COG3209	K11904			hypothetical protein
1977	GCA_000264555.1_02768	Pseudomonas chlororaphis subsp. aureofaciens O6(GCA_000264555.1)	17	85.0	S:ENOG4111U7F			GO:0016021,GO:0005886	Inner membrane protein YiaW	Cell inner membrane
1978	GCA_000264555.1_01328	Pseudomonas chlororaphis subsp. aureofaciens O6(GCA_000264555.1)	20	100.0	L:COG3695	K07443	DNA Metabolism DNA repair DNA_repair,_bacterial Methylated-DNA--protein-cysteine methyltransferase (EC 2.1.1.63)	GO:0005829,GO:0005634,GO:0003824,GO:0003684,GO:0032132,GO:0006307	Alkyltransferase-like protein 1	DNA damage
1979	GCA_000264555.1_05235	Pseudomonas chlororaphis subsp. aureofaciens O6(GCA_000264555.1)	17	85.0	S:ENOG4111UU2	K05825			Uridine kinase		KEGG: otk:C6570_02750 2-aminoadipate transaminase
1980	GCA_000264555.1_02907	Pseudomonas chlororaphis subsp. aureofaciens O6(GCA_000264555.1)	20	100.0					hypothetical protein
1981	GCA_000264555.1_06116	Pseudomonas chlororaphis subsp. aureofaciens O6(GCA_000264555.1)	20	100.0	J:COG0251	K09022			2-iminobutanoate/2-iminopropanoate deaminase		KEGG: ccp:CHC_T00000835001 2-iminobutanoate/2-iminopropanoate deaminase
1982	GCA_000264555.1_04157	Pseudomonas chlororaphis subsp. aureofaciens O6(GCA_000264555.1)	18	90.0	S:COG5507	K01077			Alkaline phosphatase		KEGG: bba:Bd3653 alkaline phosphatase
1983	GCA_003850565.1_05021	CP027706_s CMR12a(GCA_003850565.1)	1	5.0	L:COG0582	K14059	Phages, Prophages, Transposable elements Bacteriophage integration/excision/lysogeny Phage_integration_and_excision Phage integrase	GO:0003677,GO:0015074,GO:0006310,GO:0075713,GO:0046718	Putative lambdoid prophage Rac integrase	DNA integration
1984	GCA_003851495.1_03287	Pseudomonas synxantha 2-79(GCA_003851495.1)	1	5.0					hypothetical protein
1985	GCA_001921865.1_02548	MSCT_s PCL1601(GCA_001921865.1)	1	5.0	K:ENOG410Y3VB				hypothetical protein
1986	GCA_003850365.1_01271	Pseudomonas chlororaphis subsp. piscium ATCC 17809(GCA_003850365.1)	1	5.0					hypothetical protein
1987	GCA_003850565.1_00060	CP027706_s CMR12a(GCA_003850565.1)	1	5.0					hypothetical protein
1988	GCA_000264555.1_04583	Pseudomonas chlororaphis subsp. aureofaciens O6(GCA_000264555.1)	20	100.0	P:COG1393	K00537	Virulence, Disease and Defense Resistance to antibiotics and toxic compounds Arsenic_resistance Arsenate reductase (EC 1.20.4.1)	GO:0008794,GO:0046685	Arsenate reductase (glutaredoxin)	Arsenical resistance
1989	GCA_003851495.1_04380	Pseudomonas synxantha 2-79(GCA_003851495.1)	1	5.0					hypothetical protein
1990	GCA_000264555.1_00967	Pseudomonas chlororaphis subsp. aureofaciens O6(GCA_000264555.1)	15	75.0	S:ENOG411250A				hypothetical protein
1991	GCA_003851495.1_00176	Pseudomonas synxantha 2-79(GCA_003851495.1)	1	5.0					hypothetical protein
1992	GCA_003851495.1_01281	Pseudomonas synxantha 2-79(GCA_003851495.1)	1	5.0					hypothetical protein
1993	GCA_000264555.1_04092	Pseudomonas chlororaphis subsp. aureofaciens O6(GCA_000264555.1)	20	100.0	S:ENOG410Y6EV	K20353	Clustering-based subsystems null CBSS-316057.3.peg.3521 Large exoproteins involved in heme utilization or adhesion		hypothetical protein
1994	GCA_000698865.1_04788	Pseudomonas chlororaphis subsp. aureofaciens PA23(GCA_000698865.1)	5	25.0	S:ENOG410ZIBY	K19092			toxin ParE1/3/4
1995	GCA_000264555.1_02163	Pseudomonas chlororaphis subsp. aureofaciens O6(GCA_000264555.1)	1	5.0	S:ENOG410XYK4				hypothetical protein
1996	GCA_003851495.1_00078	Pseudomonas synxantha 2-79(GCA_003851495.1)	1	5.0	K:COG3617	K07741			hypothetical protein
1997	GCA_000264555.1_05584	Pseudomonas chlororaphis subsp. aureofaciens O6(GCA_000264555.1)	20	100.0	J:COG0099	K02952	Protein Metabolism Protein biosynthesis Ribosome_SSU_bacterial SSU ribosomal protein S13p (S18e)	GO:0009842,GO:0005840,GO:0019843,GO:0003735,GO:0006412	Cyanelle 30S ribosomal protein S13	Cyanelle
1998	GCA_003850365.1_03656	Pseudomonas chlororaphis subsp. piscium ATCC 17809(GCA_003850365.1)	1	5.0					hypothetical protein
1999	GCA_003851495.1_03425	Pseudomonas synxantha 2-79(GCA_003851495.1)	1	5.0					hypothetical protein
[truncated: 9,604 more rows]
