# Supplementary material for: Interplay between rhizospheric Pseudomonas chlororaphis strains lays the basis for beneficial bacterial consortia
Source: Front Plant Sci. 2022 Dec 15;13:1063182. doi: 10.3389/fpls.2022.1063182 (PMC9797978; doi:10.3389/fpls.2022.1063182)
Supplement: Supplementary file 8 [file Table_4.xlsx]

## Sheet: Core Genome
Occurence(20)	POG name	Other name(s)	EggNog ID	Kegg ID	Product	Function	Note
20	POG_GCA_000264555.1_00796	PCHLO6_RS03940			hypothetical protein
20	POG_GCA_000264555.1_03139	PCHLO6_RS15545			hypothetical protein
19	POG_GCA_000264555.1_00475	PCHLO6_RS02365			hypothetical protein
19	POG_GCA_000264555.1_01773	PCHLO6_RS08835			hypothetical protein
20	POG_GCA_000264555.1_00542	PCHLO6_RS02700			hypothetical protein
19	POG_GCA_000264555.1_02946	PCHLO6_RS14605			hypothetical protein
20	POG_GCA_000264555.1_00527	PCHLO6_RS02625			hypothetical protein
7	POG_GCA_000963835.1_01040	PCL1606_RS05160			hypothetical protein
20	POG_GCA_000264555.1_01325	PCHLO6_RS06610			hypothetical protein
20	POG_GCA_000264555.1_04866	PCHLO6_RS24065			hypothetical protein
20	POG_GCA_000264555.1_00190	PCHLO6_RS00950			hypothetical protein
18	POG_GCA_000264555.1_01015	PCHLO6_RS05050			hypothetical protein
20	POG_GCA_000264555.1_00078	PCHLO6_RS00390			hypothetical protein
20	POG_GCA_000264555.1_05064	PCHLO6_RS25055			hypothetical protein
20	POG_GCA_000264555.1_04148	PCHLO6_RS20505			hypothetical protein
20	POG_GCA_000264555.1_00228	PCHLO6_RS01140			hypothetical protein
20	POG_GCA_000264555.1_00181	PCHLO6_RS00905			hypothetical protein
18	POG_GCA_000264555.1_02445	PCHLO6_RS12150			hypothetical protein
19	POG_GCA_000264555.1_02280	PCHLO6_RS11340			hypothetical protein
18	POG_GCA_000264555.1_04652	PCHLO6_RS23015			hypothetical protein
20	POG_GCA_000264555.1_01910	PCHLO6_RS09505			hypothetical protein
18	POG_GCA_000264555.1_02402	PCHLO6_RS11935			hypothetical protein
20	POG_GCA_000264555.1_01276	PCHLO6_RS06370			hypothetical protein
18	POG_GCA_000264555.1_00777	PCHLO6_RS03850			hypothetical protein
18	POG_GCA_000264555.1_05199	PCHLO6_RS25725		K02452	general secretion pathway protein C
18	POG_GCA_000264555.1_00192	PCHLO6_RS00960			hypothetical protein
20	POG_GCA_000264555.1_04981	PCHLO6_RS24645			hypothetical protein
19	POG_GCA_000264555.1_01132	PCHLO6_RS05640			hypothetical protein
20	POG_GCA_000264555.1_01300	PCHLO6_RS06490		K03791	putative chitinase
6	POG_GCA_000963835.1_04647	PCL1606_RS22965			hypothetical protein
20	POG_GCA_000264555.1_03519	PCHLO6_RS17415			hypothetical protein
19	POG_GCA_000264555.1_02994	PCHLO6_RS14840			hypothetical protein
20	POG_GCA_000264555.1_01267	PCHLO6_RS06325			hypothetical protein
19	POG_GCA_000264555.1_03387	,			hypothetical protein
18	POG_GCA_000264555.1_05261	,			hypothetical protein
18	POG_GCA_000264555.1_00581	PCHLO6_RS02895			hypothetical protein
18	POG_GCA_000264555.1_01862	,		K07351	fimbrial protein
18	POG_GCA_000264555.1_03374	PCHLO6_RS16700			hypothetical protein
20	POG_GCA_000264555.1_01586	PCHLO6_RS07900			hypothetical protein
18	POG_GCA_000264555.1_02181	PCHLO6_RS10855			hypothetical protein
12	POG_GCA_000264555.1_01509	PCHLO6_RS07525			hypothetical protein
20	POG_GCA_000264555.1_04219	PCHLO6_RS20855			hypothetical protein
20	POG_GCA_000264555.1_04336	PCHLO6_RS21435			hypothetical protein
20	POG_GCA_000264555.1_01010	PCHLO6_RS05025			hypothetical protein
19	POG_GCA_000264555.1_01831	PCHLO6_RS09120			hypothetical protein
18	POG_GCA_000264555.1_00201	PCHLO6_RS01005			hypothetical protein
20	POG_GCA_000264555.1_03057	PCHLO6_RS15145			hypothetical protein
19	POG_GCA_000264555.1_03886	PCHLO6_RS19215			hypothetical protein
20	POG_GCA_000264555.1_02992	PCHLO6_RS14835			hypothetical protein
20	POG_GCA_000264555.1_06259	PCHLO6_RS30975			hypothetical protein
16	POG_GCA_000264555.1_01014	PCHLO6_RS05045			hypothetical protein
19	POG_GCA_000264555.1_02733	PCHLO6_RS13550			hypothetical protein
20	POG_GCA_000264555.1_02628	PCHLO6_RS13040			hypothetical protein
19	POG_GCA_000264555.1_04323	PCHLO6_RS21370			hypothetical protein
20	POG_GCA_000264555.1_02453	,			hypothetical protein
20	POG_GCA_000264555.1_01306	PCHLO6_RS06520			hypothetical protein
13	POG_GCA_000698865.1_02152	,			hypothetical protein
19	POG_GCA_000264555.1_05723	PCHLO6_RS28320			hypothetical protein
20	POG_GCA_000264555.1_05542	PCHLO6_RS27420			hypothetical protein
18	POG_GCA_000264555.1_02186	PCHLO6_RS10880			hypothetical protein
20	POG_GCA_000264555.1_00049	PCHLO6_RS00245			hypothetical protein
18	POG_GCA_000264555.1_04220	PCHLO6_RS20860			hypothetical protein
18	POG_GCA_000264555.1_02788	PCHLO6_RS13820			hypothetical protein
7	POG_GCA_000963835.1_03045	PCL1606_RS15060			hypothetical protein
18	POG_GCA_000264555.1_04987	PCHLO6_RS24675			hypothetical protein
20	POG_GCA_000264555.1_03381	PCHLO6_RS16735			hypothetical protein
19	POG_GCA_000264555.1_00050	PCHLO6_RS00250			hypothetical protein
13	POG_GCA_000281915.1_02420	PCHL3084_RS12035			hypothetical protein
20	POG_GCA_000264555.1_02574	PCHLO6_RS12785			hypothetical protein
19	POG_GCA_000264555.1_05169	PCHLO6_RS25575			hypothetical protein
20	POG_GCA_000264555.1_00778	PCHLO6_RS03855			hypothetical protein
18	POG_GCA_000264555.1_04261	PCHLO6_RS21060			hypothetical protein
20	POG_GCA_000264555.1_01772	PCHLO6_RS08830			hypothetical protein
20	POG_GCA_000264555.1_00831	PCHLO6_RS04125			hypothetical protein
20	POG_GCA_000264555.1_00641	PCHLO6_RS03190			hypothetical protein
20	POG_GCA_000264555.1_00354	PCHLO6_RS01765			hypothetical protein
20	POG_GCA_000264555.1_04385	PCHLO6_RS21685			hypothetical protein
17	POG_GCA_000264555.1_02626	PCHLO6_RS13030			hypothetical protein
17	POG_GCA_000264555.1_02334	PCHLO6_RS11600			hypothetical protein
20	POG_GCA_000264555.1_02632	PCHLO6_RS13060			hypothetical protein
16	POG_GCA_000264555.1_01013	PCHLO6_RS05040			hypothetical protein
19	POG_GCA_000264555.1_01600	PCHLO6_RS07970			hypothetical protein
20	POG_GCA_000264555.1_00703	PCHLO6_RS03490			hypothetical protein
18	POG_GCA_000264555.1_03551	PCHLO6_RS17570			major type 1 subunit fimbrin (pilin)
12	POG_GCA_000281915.1_02809	,			hypothetical protein
20	POG_GCA_000264555.1_04713	PCHLO6_RS23305			hypothetical protein
20	POG_GCA_000264555.1_00377	PCHLO6_RS01880			hypothetical protein
20	POG_GCA_000264555.1_04841	PCHLO6_RS23945			hypothetical protein
20	POG_GCA_000264555.1_02239	PCHLO6_RS11140			hypothetical protein
20	POG_GCA_000264555.1_01803	PCHLO6_RS08980			hypothetical protein
20	POG_GCA_000264555.1_01579	PCHLO6_RS07865			hypothetical protein
20	POG_GCA_000264555.1_04754	PCHLO6_RS23510			hypothetical protein
20	POG_GCA_000264555.1_00792	PCHLO6_RS03920			hypothetical protein
20	POG_GCA_000264555.1_02907	PCHLO6_RS14410			hypothetical protein
18	POG_GCA_000264555.1_03949	PCHLO6_RS19510			hypothetical protein
20	POG_GCA_000264555.1_05556	PCHLO6_RS27490			hypothetical protein
20	POG_GCA_000264555.1_03532	PCHLO6_RS17480			hypothetical protein
20	POG_GCA_000264555.1_01265	PCHLO6_RS06315			hypothetical protein
18	POG_GCA_000264555.1_04318	PCHLO6_RS21345			hypothetical protein
19	POG_GCA_000264555.1_00790	PCHLO6_RS03915			hypothetical protein
20	POG_GCA_000264555.1_01381	PCHLO6_RS06885			hypothetical protein
20	POG_GCA_000264555.1_04353	PCHLO6_RS21520			hypothetical protein
20	POG_GCA_000264555.1_04041	PCHLO6_RS19975			hypothetical protein
20	POG_GCA_000264555.1_03962	PCHLO6_RS19575			hypothetical protein
20	POG_GCA_000264555.1_02979	PCHLO6_RS14770			hypothetical protein
20	POG_GCA_000264555.1_04666	PCHLO6_RS23085			hypothetical protein
20	POG_GCA_000264555.1_05251	PCHLO6_RS25990			hypothetical protein
20	POG_GCA_000264555.1_01269	PCHLO6_RS06335		K06903	uncharacterized protein
20	POG_GCA_000264555.1_02455	PCHLO6_RS12200			hypothetical protein
20	POG_GCA_000264555.1_05785	PCHLO6_RS28630			hypothetical protein
20	POG_GCA_000264555.1_00985	PCHLO6_RS04905			hypothetical protein
20	POG_GCA_000264555.1_04480	PCHLO6_RS22165			hypothetical protein
20	POG_GCA_000264555.1_05939	PCHLO6_RS29400			hypothetical protein
20	POG_GCA_000264555.1_05472	PCHLO6_RS27075			hypothetical protein
20	POG_GCA_000264555.1_04346	PCHLO6_RS21485			hypothetical protein
20	POG_GCA_000264555.1_04656	PCHLO6_RS23035			hypothetical protein
18	POG_GCA_000264555.1_02790	PCHLO6_RS13830			hypothetical protein
20	POG_GCA_000264555.1_01624	PCHLO6_RS08090			hypothetical protein
20	POG_GCA_000264555.1_02252	PCHLO6_RS11205			hypothetical protein
20	POG_GCA_000264555.1_01583	PCHLO6_RS07885			hypothetical protein
20	POG_GCA_000264555.1_01142	PCHLO6_RS05690			hypothetical protein
19	POG_GCA_000264555.1_05380	PCHLO6_RS26625			hypothetical protein
20	POG_GCA_000264555.1_02255	PCHLO6_RS11220			hypothetical protein
20	POG_GCA_000264555.1_00849	PCHLO6_RS04220			hypothetical protein
20	POG_GCA_000264555.1_04962	PCHLO6_RS24550			hypothetical protein
20	POG_GCA_000264555.1_04396	PCHLO6_RS21745			hypothetical protein
20	POG_GCA_000264555.1_02882	PCHLO6_RS14295			hypothetical protein
19	POG_GCA_000264555.1_04909	PCHLO6_RS24285			hypothetical protein
20	POG_GCA_000264555.1_05163	PCHLO6_RS25545			hypothetical protein
20	POG_GCA_000264555.1_00096	PCHLO6_RS00480			hypothetical protein
20	POG_GCA_000264555.1_04636	PCHLO6_RS22935			hypothetical protein
20	POG_GCA_000264555.1_01104	PCHLO6_RS05500			hypothetical protein
19	POG_GCA_000264555.1_02832	PCHLO6_RS14050			hypothetical protein
20	POG_GCA_000264555.1_00811	PCHLO6_RS04015			hypothetical protein
20	POG_GCA_000264555.1_02582	PCHLO6_RS12820			hypothetical protein
17	POG_GCA_000264555.1_03885	PCHLO6_RS19210			hypothetical protein
20	POG_GCA_000264555.1_02798	PCHLO6_RS13880			hypothetical protein
19	POG_GCA_000264555.1_02288	PCHLO6_RS11380			hypothetical protein
20	POG_GCA_000264555.1_04470	PCHLO6_RS22115			hypothetical protein
13	POG_GCA_000281915.1_01647	PCHL3084_RS08230			hypothetical protein
19	POG_GCA_000264555.1_05038	PCHLO6_RS24920			hypothetical protein
20	POG_GCA_000264555.1_00234	PCHLO6_RS01175			hypothetical protein
20	POG_GCA_000264555.1_04765	PCHLO6_RS23565			hypothetical protein
20	POG_GCA_000264555.1_05378	PCHLO6_RS26615			hypothetical protein
20	POG_GCA_000264555.1_03082	PCHLO6_RS15270			hypothetical protein
16	POG_GCA_000264555.1_03237	PCHLO6_RS16015			hypothetical protein
20	POG_GCA_000264555.1_03414	PCHLO6_RS16900			hypothetical protein
20	POG_GCA_000264555.1_04293	PCHLO6_RS21220			hypothetical protein
20	POG_GCA_000264555.1_03050	PCHLO6_RS15110			hypothetical protein
18	POG_GCA_000264555.1_04340	PCHLO6_RS21455			hypothetical protein
19	POG_GCA_000264555.1_02819	PCHLO6_RS13985			hypothetical protein
19	POG_GCA_000264555.1_00875	PCHLO6_RS04355			hypothetical protein
19	POG_GCA_000264555.1_00651	PCHLO6_RS03240			hypothetical protein
18	POG_GCA_000264555.1_03083	PCHLO6_RS15275			hypothetical protein
20	POG_GCA_000264555.1_01940	PCHLO6_RS09655			hypothetical protein
18	POG_GCA_000264555.1_02887	PCHLO6_RS14315			hypothetical protein
19	POG_GCA_000264555.1_00272	PCHLO6_RS01360			hypothetical protein
16	POG_GCA_000281915.1_00338	PCHL3084_RS01695			hypothetical protein
20	POG_GCA_000264555.1_03004	PCHLO6_RS14885			hypothetical protein
20	POG_GCA_000264555.1_01821	PCHLO6_RS09070			hypothetical protein
19	POG_GCA_000264555.1_01645	PCHLO6_RS08200		K02078	acyl carrier protein
18	POG_GCA_000264555.1_03358	PCHLO6_RS16625			hypothetical protein
18	POG_GCA_000264555.1_02237	PCHLO6_RS11130			hypothetical protein
20	POG_GCA_000264555.1_02598	PCHLO6_RS12895			hypothetical protein
19	POG_GCA_000264555.1_03964	PCHLO6_RS19585			hypothetical protein
20	POG_GCA_000264555.1_06121	PCHLO6_RS30290			hypothetical protein
20	POG_GCA_000264555.1_01982	PCHLO6_RS09865			hypothetical protein
19	POG_GCA_000264555.1_05142	PCHLO6_RS25440			hypothetical protein
20	POG_GCA_000264555.1_05082	PCHLO6_RS25145			hypothetical protein
18	POG_GCA_000264555.1_04621	PCHLO6_RS22860			hypothetical protein
20	POG_GCA_000264555.1_01385	,			hypothetical protein
20	POG_GCA_000264555.1_02241	PCHLO6_RS11150			hypothetical protein
19	POG_GCA_000264555.1_04540	PCHLO6_RS22465			hypothetical protein
20	POG_GCA_000264555.1_04852	PCHLO6_RS24000			hypothetical protein
18	POG_GCA_000264555.1_03948	PCHLO6_RS19505			hypothetical protein
20	POG_GCA_000264555.1_02868	PCHLO6_RS14225			hypothetical protein
20	POG_GCA_000264555.1_03901	PCHLO6_RS19285		K09794	uncharacterized protein
20	POG_GCA_000264555.1_05166	PCHLO6_RS25560			hypothetical protein
20	POG_GCA_000264555.1_02627	PCHLO6_RS13035			hypothetical protein
18	POG_GCA_000264555.1_03297	PCHLO6_RS16315			hypothetical protein
20	POG_GCA_000264555.1_03529	PCHLO6_RS17465			hypothetical protein
20	POG_GCA_000264555.1_02342	PCHLO6_RS11640			hypothetical protein
19	POG_GCA_000264555.1_02953	PCHLO6_RS14640			hypothetical protein
19	POG_GCA_000264555.1_05087	PCHLO6_RS25170			hypothetical protein
20	POG_GCA_000264555.1_04541	PCHLO6_RS22470			hypothetical protein
20	POG_GCA_000264555.1_01273	PCHLO6_RS06355			hypothetical protein
20	POG_GCA_000264555.1_03023	PCHLO6_RS14980			hypothetical protein
20	POG_GCA_000264555.1_05786	PCHLO6_RS28635			hypothetical protein
20	POG_GCA_000264555.1_02625	PCHLO6_RS13025			hypothetical protein
11	POG_GCA_000281915.1_02659	PCHL3084_RS13230			hypothetical protein
20	POG_GCA_000264555.1_05325	PCHLO6_RS26350			hypothetical protein
19	POG_GCA_000264555.1_02830	PCHLO6_RS14040			hypothetical protein
20	POG_GCA_000264555.1_06223	,			hypothetical protein
20	POG_GCA_000264555.1_02251	PCHLO6_RS11200			hypothetical protein
18	POG_GCA_000264555.1_00690	PCHLO6_RS03430		K02651	pilus assembly protein Flp/PilA
18	POG_GCA_000264555.1_00115	PCHLO6_RS00575			hypothetical protein
18	POG_GCA_000264555.1_03545	PCHLO6_RS17540			hypothetical protein
20	POG_GCA_000264555.1_01333	PCHLO6_RS06650			hypothetical protein
20	POG_GCA_000264555.1_05164	PCHLO6_RS25550			hypothetical protein
18	POG_GCA_000264555.1_02886	PCHLO6_RS14310			hypothetical protein
20	POG_GCA_000264555.1_03548	PCHLO6_RS17555			hypothetical protein
19	POG_GCA_000264555.1_02629	PCHLO6_RS13045			hypothetical protein
20	POG_GCA_000264555.1_02191	PCHLO6_RS10905			hypothetical protein
20	POG_GCA_000264555.1_04093	PCHLO6_RS20235			hypothetical protein
19	POG_GCA_000264555.1_00191	PCHLO6_RS00955			hypothetical protein
18	POG_GCA_000264555.1_02774	PCHLO6_RS13755			hypothetical protein
19	POG_GCA_000264555.1_00891	PCHLO6_RS04430			hypothetical protein
20	POG_GCA_000264555.1_02998	PCHLO6_RS14855			hypothetical protein
20	POG_GCA_000264555.1_04570	,			hypothetical protein
19	POG_GCA_000264555.1_01954	PCHLO6_RS09730			hypothetical protein
19	POG_GCA_000264555.1_03527	PCHLO6_RS17455			hypothetical protein
17	POG_GCA_000264555.1_02619	,			hypothetical protein
20	POG_GCA_000264555.1_01691	PCHLO6_RS08430			hypothetical protein
20	POG_GCA_000264555.1_04094	PCHLO6_RS20240			hypothetical protein
19	POG_GCA_000264555.1_04830	PCHLO6_RS23890			hypothetical protein
20	POG_GCA_000264555.1_00706	PCHLO6_RS03505			hypothetical protein
20	POG_GCA_000264555.1_04898	PCHLO6_RS24230			hypothetical protein
20	POG_GCA_000264555.1_02884	PCHLO6_RS14305			hypothetical protein
20	POG_GCA_000264555.1_04622	PCHLO6_RS22865			hypothetical protein
20	POG_GCA_000264555.1_02049	PCHLO6_RS10195			hypothetical protein
20	POG_GCA_000264555.1_04507	,			hypothetical protein
20	POG_GCA_000264555.1_01382	,			hypothetical protein
20	POG_GCA_000264555.1_03026	,			hypothetical protein
20	POG_GCA_000264555.1_03534	,			hypothetical protein
19	POG_GCA_000264555.1_02341	PCHLO6_RS11635		K21904	hypothetical protein
20	POG_GCA_000264555.1_04419	,			hypothetical protein
20	POG_GCA_000264555.1_00791	,			hypothetical protein
18	POG_GCA_000264555.1_03372	,			hypothetical protein
6	POG_GCA_000963835.1_02252	,			hypothetical protein
20	POG_GCA_000264555.1_01957	,			hypothetical protein
20	POG_GCA_000264555.1_06006	PCHLO6_RS29735			hypothetical protein
20	POG_GCA_000264555.1_05958	,			hypothetical protein
18	POG_GCA_000264555.1_01795	,			hypothetical protein
19	POG_GCA_000264555.1_06165	PCHLO6_RS30510			hypothetical protein
20	POG_GCA_000264555.1_01687	PCHLO6_RS08410			hypothetical protein
18	POG_GCA_000264555.1_02702	,			hypothetical protein
19	POG_GCA_000264555.1_02997	,			hypothetical protein
20	POG_GCA_000264555.1_01692	,			hypothetical protein
19	POG_GCA_000264555.1_02885	,			hypothetical protein
20	POG_GCA_000264555.1_04546	,			hypothetical protein
18	POG_GCA_000264555.1_04706	,			hypothetical protein
20	POG_GCA_000264555.1_01383	PCHLO6_RS06890			hypothetical protein
20	POG_GCA_000264555.1_03869	,			hypothetical protein
18	POG_GCA_000264555.1_04690	,			hypothetical protein
20	POG_GCA_000264555.1_01943	,			hypothetical protein
19	POG_GCA_000264555.1_00250	,			hypothetical protein
19	POG_GCA_000264555.1_00588	,			hypothetical protein
20	POG_GCA_000264555.1_04417	,		K01545	K+-transporting ATPase ATPase F chain
20	POG_GCA_000264555.1_00554	orn,REX2,REXO2,PCHLO6_RS02760	A:COG1949	K13288	Oligoribonuclease	Cytoplasm; Exonuclease; Hydrolase; Nuclease.	3'-to-5' exoribonuclease specific for small oligoribonucleotides; Belongs to the oligoribonuclease family; Contains 1 exonuclease domain.; KEGG: pae:PA4951 oligoribonuclease; Acting on ester bonds
20	POG_GCA_000264555.1_03486	HDAC6,PCHLO6_RS17255	BQ:COG0123	K11407	Histone deacetylase	Hydrolase.	Putative deacetylase; Belongs to the histone deacetylase family.; KEGG: tcc:18604061 histone deacetylase 6
20	POG_GCA_000264555.1_06208	HDAC6,PCHLO6_RS30730	BQ:COG0123	K11407	Histone deacetylase	Hydrolase; Metal-binding; Zinc.	Acts on many types of acetylpolyamines. Has high affinity towards acetylputrescine, acetylcadaverine, acetylspermidine, and acetylspermine. Acts on L-Lys-(epsilon- acetyl)-coumarin, but has very low activity towards acetylated peptides. Belongs to the histone deacetylase family.; KEGG: dpx:DAPPUDRAFT_308757 histone deacetylase 6
20	POG_GCA_000264555.1_04270	PCHLO6_RS21105	BQ:COG0123	K04768	Acetylpolyamine aminohydrolase	Hydrolase; Metal-binding; Zinc.	Acts on many types of acetylpolyamines. Has high affinity towards acetylputrescine, acetylcadaverine, acetylspermidine, and acetylspermine. Acts on L-Lys-(epsilon- acetyl)-coumarin, but has very low activity towards acetylated peptides (By similarity); Belongs to the histone deacetylase family.
20	POG_GCA_000264555.1_05438	HDAC11,PCHLO6_RS26910	BQ:COG0123	K11418	Histone deacetylase	Hydrolase.	Putative deacetylase; Belongs to the histone deacetylase family.; KEGG: ath:AT5G26040 histone deacetylase 11
20	POG_GCA_000264555.1_02551	BCKDHB,bkdA2,PCHLO6_RS12670	C:COG0022	K00167	3-methyl-2-oxobutanoate dehydrogenase (2-methylpropanoyl-transferring)	Oxidoreductase; Thiamine pyrophosphate.	KEGG: pfl:PFL_2533 2-oxoisovalerate dehydrogenase E1 component beta subunit
20	POG_GCA_000264555.1_01816	sucC,PCHLO6_RS09045	C:COG0045	K01903	Succinate--CoA ligase (ADP-forming)	ATP-binding; Ligase; Magnesium; Manganese; Metal-binding; Nucleotide-binding; Tricarboxylic acid cycle.	Belongs to the succinate/malate CoA ligase beta subunit family; Contains 1 ATP-grasp domain.; KEGG: pshi:SAMEA2665130_2191 succinyl-CoA synthetase beta subunit
20	POG_GCA_000264555.1_06297	ATPF1B,atpD,PCHLO6_RS31165	C:COG0055	K02112	H(+)-transporting two-sector ATPase	ATP synthesis; ATP-binding; Cell inner membrane; Cell membrane; CF(1); Hydrogen ion transport; Hydrolase; Ion transport; Membrane; Nucleotide-binding; Transport.	Produces ATP from ADP in the presence of a proton gradient across the membrane. The catalytic sites are hosted primarily by the beta subunits; Belongs to the ATPase alpha/beta chains family.; KEGG: eco:b3732 F-type H+-transporting ATPase subunit beta
20	POG_GCA_000264555.1_06299	ATPF1A,atpA,PCHLO6_RS31175	C:COG0056	K02111	H(+)-transporting two-sector ATPase	ATP synthesis; ATP-binding; Cell inner membrane; Cell membrane; CF(1); Hydrogen ion transport; Hydrolase; Ion transport; Membrane; Nucleotide-binding; Transport.	Produces ATP from ADP in the presence of a proton gradient across the membrane. The alpha chain is a regulatory subunit; Belongs to the ATPase alpha/beta chains family.; KEGG: pae:PA5556 F-type H+-transporting ATPase subunit alpha
20	POG_GCA_000264555.1_01817	sucD,PCHLO6_RS09050	C:COG0074	K01902	Succinate--CoA ligase (ADP-forming)	ATP-binding; Ligase; Nucleotide-binding; Phosphoprotein; Tricarboxylic acid cycle.	Belongs to the succinate/malate CoA ligase alpha subunit family.; KEGG: eco:b0729 succinyl-CoA synthetase alpha subunit
20	POG_GCA_000264555.1_04451	fumC,FH,PCHLO6_RS22015	C:COG0114	K01679	Fumarate hydratase	Allosteric enzyme; Cytoplasm; Lyase; Tricarboxylic acid cycle.	Catalyzes the reversible addition of water to fumarate to give L-malate; Belongs to the class-II fumarase/aspartase family. Fumarase subfamily.; KEGG: ben:BOBLI757_376 fumarate hydratase, class II
20	POG_GCA_000264555.1_00915	fumC,FH,PCHLO6_RS04550	C:COG0114	K01679	Fumarate hydratase	Allosteric enzyme; Cytoplasm; Lyase; Tricarboxylic acid cycle.	Catalyzes the reversible addition of water to fumarate to give L-malate; Belongs to the class-II fumarase/aspartase family. Fumarase subfamily.; KEGG: ddd:Dda3937_04126 fumarate hydratase, class II
19	POG_GCA_000264555.1_02955	cysI,PCHLO6_RS14650	C:COG0155	K00381	Assimilatory sulfite reductase (NADPH)	4Fe-4S; Heme; Iron; Iron-sulfur; Metal-binding; Oxidoreductase; Thioether bond.	Catalyzes the reduction of sulfite to sulfide, a step in the biosynthesis of sulfur-containing amino acids and cofactors; Belongs to the nitrite and sulfite reductase 4Fe-4S domain family.; KEGG: pre:PCA10_08910 sulfite reductase (NADPH) hemoprotein beta-component
20	POG_GCA_000264555.1_03870	cysI,PCHLO6_RS19135	C:COG0155	K00381	Assimilatory sulfite reductase (NADPH)	4Fe-4S; Chloroplast; Electron transport; Heme; Iron; Iron-sulfur; Isopeptide bond; Metal-binding; Nitrate assimilation; Oxidoreductase; Plastid; Repeat; Transit peptide; Transport; Ubl conjugation.	Catalyzes the six-electron reduction of nitrite to ammonium; Belongs to the nitrite and sulfite reductase 4Fe-4S domain family.; KEGG: pae:PA1838 sulfite reductase (NADPH) hemoprotein beta-component
20	POG_GCA_000264555.1_00647	cobG,PCHLO6_RS03220	C:COG0155	K02229	Precorrin-3B synthase	4Fe-4S; Cobalamin biosynthesis; Heme; Iron; Iron-sulfur; Metal-binding; NAD; Oxidoreductase; Porphyrin biosynthesis.	Catalyzes the elimination of C-20 in precorrin-3A to form precorrin-3B. Belongs to the nitrite and sulfite reductase 4Fe-4S domain family.; KEGG: pch:EY04_02590 precorrin-3B synthase
20	POG_GCA_000264555.1_05511	ppa,PCHLO6_RS27265	C:COG0221	K01507	Inorganic diphosphatase	Cytoplasm; Hydrolase; Magnesium; Metal-binding.	Belongs to the PPase family.; KEGG: ben:BOBLI757_094 inorganic pyrophosphatase
20	POG_GCA_000264555.1_06298	PCHLO6_RS31170	C:COG0224	K02115	ATP synthase gamma chain	ATP synthesis; Cell inner membrane; Cell membrane; CF(1); Hydrogen ion transport; Ion transport; Membrane; Transport.	Produces ATP from ADP in the presence of a proton gradient across the membrane. The gamma chain is believed to be important in regulating ATPase activity and the flow of protons through the CF(0) complex; Belongs to the ATPase gamma chain family.
20	POG_GCA_000264555.1_01838	gpsA,PCHLO6_RS09155	C:COG0240	K00057	Glycerol-3-phosphate dehydrogenase (NAD(P)(+))	Cytoplasm; Lipid biosynthesis; Lipid metabolism; NAD; Oxidoreductase; Phospholipid biosynthesis; Phospholipid metabolism.	Belongs to the NAD-dependent glycerol-3-phosphate dehydrogenase family.; KEGG: pfl:PFL_1741 glycerol-3-phosphate dehydrogenase (NAD(P)+)
20	POG_GCA_000264555.1_00308	fdoG,fdhF,fdwA,PCHLO6_RS01535	C:COG0243	K00123	Formate dehydrogenase	4Fe-4S; Iron; Iron-sulfur; Metal-binding; Molybdenum; Oxidoreductase.	Probably involved in acid resistance; Belongs to the prokaryotic molybdopterin-containing oxidoreductase family.; KEGG: bgf:BC1003_3894 formate dehydrogenase major subunit
20	POG_GCA_000264555.1_04908	fdhA,PCHLO6_RS24280	C:COG0243	K05299	Formate dehydrogenase (NADP(+))	Iron; Iron-sulfur; Metal-binding; Molybdenum; Oxidoreductase.	Belongs to the prokaryotic molybdopterin-containing oxidoreductase family; Contains 1 4Fe-4S Mo/W bis-MGD-type domain.; KEGG: mth:MTH_1552 formate dehydrogenase (NADP+) alpha subunit
20	POG_GCA_000264555.1_01987	nasA,PCHLO6_RS09890	C:COG0243|C:COG1251	K00372	Nitrate reductase	4Fe-4S; Iron; Iron-sulfur; Metal-binding; Molybdenum; Nitrate assimilation; Oxidoreductase.	Nitrate reductase is a key enzyme involved in the first step of nitrate assimilation in plants, fungi and bacteria. Belongs to the prokaryotic molybdopterin-containing oxidoreductase family. NasA/NapA/NarB subfamily; Contains 1 4Fe-4S Mo/W bis-MGD-type domain.; KEGG: pprc:PFLCHA0_c19100 assimilatory nitrate reductase catalytic subunit; With other acceptors
20	POG_GCA_000264555.1_05747	PCHLO6_RS28440	C:COG0247	K21834	Uncharacterized protein FadF	Cell membrane; Membrane; Repeat; Transmembrane; Transmembrane helix.	Contains 2 4Fe-4S ferredoxin-type domains.
19	POG_GCA_000264555.1_02337	PCHLO6_RS11615	C:COG0247	K11473	Glycolate oxidase iron-sulfur subunit	4Fe-4S; Electron transport; Iron; Iron-sulfur; Metal-binding; Repeat; Transport.	Contains 2 4Fe-4S ferredoxin-type domains.
19	POG_GCA_000264555.1_00815	PCHLO6_RS04035	C:COG0247	K18928	Lactate utilization protein A 1		Is involved in L-lactate degradation and allows cells to grow with lactate as the sole carbon source; Belongs to the LutA/YkgE family.
18	POG_GCA_000264555.1_03294	glcD,PCHLO6_RS16300	C:COG0247|C:COG0277	K00104	(S)-2-hydroxy-acid oxidase		Contains 1 4Fe-4S ferredoxin-type domain; Contains 1 FAD-binding PCMH-type domain; To E.coli YdiJ; To mammalian alkyldihydroxyacetonephosphate synthases, to yeast AIP2 and DLD1 and to E.coli YgcU.; KEGG: obt:OPIT5_25980 glycolate oxidase
20	POG_GCA_000264555.1_00812	PCHLO6_RS04020	C:COG0247|C:COG0277	K18930	Glycolate oxidase subunit GlcD	FAD; Flavoprotein; Oxidoreductase.	Belongs to the FAD-binding oxidoreductase/transferase type 4 family; Contains 1 FAD-binding PCMH-type domain.
19	POG_GCA_000264555.1_02339	glcD,PCHLO6_RS11625	C:COG0277	K00104	(S)-2-hydroxy-acid oxidase	FAD; Flavoprotein; Oxidoreductase.	Belongs to the FAD-binding oxidoreductase/transferase type 4 family; Contains 1 FAD-binding PCMH-type domain.; KEGG: eco:b2979 glycolate oxidase
20	POG_GCA_000264555.1_05906	glcD,PCHLO6_RS29240	C:COG0277	K00104	(S)-2-hydroxy-acid oxidase	FAD; Flavoprotein; Oxidoreductase.	Belongs to the FAD-binding oxidoreductase/transferase type 4 family; Contains 1 FAD-binding PCMH-type domain.; KEGG: ppw:PputW619_2202 glycolate oxidase
19	POG_GCA_000264555.1_03921	GLDH,PCHLO6_RS19380	C:COG0277	K00225	L-galactonolactone dehydrogenase	Membrane; Mitochondrion; Oxidoreductase; Transit peptide; Transmembrane; Transmembrane helix.	Involved in the biosynthesis of ascorbic acid; Contains 1 FAD-binding PCMH-type domain.; KEGG: apro:F751_5711 L-galactono-1,4-lactone dehydrogenase
19	POG_GCA_000264555.1_02338	PCHLO6_RS11620	C:COG0277	K11472	Glycolate oxidase subunit GlcE	Oxidoreductase.	Contains 1 FAD-binding PCMH-type domain.
20	POG_GCA_000264555.1_00944	pta,PCHLO6_RS04695	C:COG0280|C:COG0857	K13788	Phosphate acetyltransferase	Acyltransferase; Cytoplasm; Transferase.	Involved in acetate metabolism. In combination with LdhA and AckA, allows fermentation of pyruvate, enhancing long-term survival under anaerobic conditions; In the N-terminal sectio; belongs to the CobB/CobQ family; In the C-terminal sectio; belongs to the phosphate acetyltransferase and butyryltransferase family.; KEGG: pae:PA0835 phosphate acetyltransferase
20	POG_GCA_000264555.1_00450	maeB,PCHLO6_RS02240	C:COG0281	K00029	Malate dehydrogenase (oxaloacetate-decarboxylating) (NADP(+))	Metal-binding; Multifunctional enzyme; NADP; Oxidoreductase.	In the N-terminal sectio; belongs to the malic enzymes family; In the C-terminal sectio; belongs to the phosphate acetyltransferase and butyryltransferase family.; KEGG: hdu:HD_1247 malate dehydrogenase (oxaloacetate-decarboxylating)(NADP+)
20	POG_GCA_000264555.1_02030	PCHLO6_RS10100	C:COG0348		Nitrogen fixation protein FixG	4Fe-4S; Cell membrane; Electron transport; Iron; Iron-sulfur; Membrane; Metal-binding; Nitrogen fixation; Plasmid; Transmembrane; Transmembrane helix; Transport.	FixG is predicted to be involved in a redox process. The four proteins FixG, FixH, FixI, and FixS may participate in a membrane-bound complex coupling the FixI cation pump with a redox process catalyzed by FixG. Contains 1 4Fe-4S ferredoxin-type domain.
20	POG_GCA_000264555.1_02968	PCHLO6_RS14715	C:COG0348		Protein RdxA	4Fe-4S; Cell membrane; Electron transport; Iron; Iron-sulfur; Membrane; Metal-binding; Repeat; Transmembrane; Transmembrane helix; Transport.	Predicted to be involved in a redox process. Contains 2 4Fe-4S ferredoxin-type domains.
20	POG_GCA_000264555.1_06296	PCHLO6_RS31160	C:COG0355	K02114	ATP synthase epsilon chain	ATP synthesis; Cell inner membrane; Cell membrane; CF(1); Hydrogen ion transport; Ion transport; Membrane; Transport.	Produces ATP from ADP in the presence of a proton gradient across the membrane; Belongs to the ATPase epsilon chain family.
20	POG_GCA_000264555.1_06303	PCHLO6_RS31195	C:COG0356	K02108	ATP synthase subunit a	ATP synthesis; Cell inner membrane; Cell membrane; CF(0); Hydrogen ion transport; Ion transport; Membrane; Transmembrane; Transmembrane helix; Transport.	Key component of the proton channe; it plays a direct role in the translocation of protons across the membrane; Belongs to the ATPase A chain family.
20	POG_GCA_000264555.1_01808	CS,gltA,PCHLO6_RS09005	C:COG0372	K01647	Citrate (Si)-synthase	Allosteric enzyme; Transferase; Tricarboxylic acid cycle.	Belongs to the citrate synthase family.; KEGG: enf:AKI40_2176 citrate synthase
20	POG_GCA_000264555.1_01973	prpC,PCHLO6_RS09820	C:COG0372	K01659	2-methylcitrate synthase	Transferase; Tricarboxylic acid cycle.	Involved in the catabolism of short chain fatty acids (SCFA) via the tricarboxylic acid (TCA)(acetyl degradation route) and via the 2-methylcitrate cycle II (propionate degradation route). Catalyzes the Claisen condensation of propionyl-CoA and oxaloacetate (OAA) to yield (2S,3S)-2-methylcitrate (2-MC) and CoA (PubMed:14702315). Catalyzes the condensation of oxaloacetate with acetyl-CoA (By simil…
20	POG_GCA_000264555.1_03997	nuoB,PCHLO6_RS19750	C:COG0377	K00331	NADH:ubiquinone reductase (H(+)-translocating)	4Fe-4S; Cell inner membrane; Cell membrane; Iron; Iron-sulfur; Membrane; Metal-binding; NAD; Oxidoreductase; Quinone; Transport; Ubiquinone.	NDH-1 shuttles electrons from NADH, via FMN and iron- sulfur (Fe-S) centers, to quinones in the respiratory chain. The immediate electron acceptor for the enzyme in this species is believed to be ubiquinone. Couples the redox reaction to proton translocation (for every two electrons transferred, four hydrogen ions are translocated across the cytoplasmic membrane), and thus conserves the redox ene…
20	POG_GCA_000264555.1_06112	ict-Y,PCHLO6_RS30245	C:COG0427	K18288	hypothetical protein		KEGG: oai:OLEAN_C16220 itaconate CoA-transferase; CoA-transferases
20	POG_GCA_000264555.1_00117	aarC,cat1,PCHLO6_RS00585	C:COG0427	K18118	Succinyl-CoA:acetate CoA-transferase	Transferase.	Utilizes succinyl-CoA to convert toxic acetate to acetyl-CoA and succinate. Required for growth on acetic acid and for resistance to high levels of acetic acid. Has also low activity with acetoacetate as substrate; Belongs to the acetyl-CoA hydrolase/transferase family.; KEGG: pae:PA5445 succinyl-CoA:acetate CoA-transferase
20	POG_GCA_000264555.1_01812	sdhB,frdB,PCHLO6_RS09025	C:COG0479	K00240	Succinate dehydrogenase (quinone)	2Fe-2S; 3Fe-4S; 4Fe-4S; Cell inner membrane; Cell membrane; Electron transport; Iron; Iron-sulfur; Membrane; Metal-binding; Oxidoreductase; Transport; Tricarboxylic acid cycle.	Two distinct, membrane-bound, FAD-containing enzymes are responsible for the catalysis of fumarate and succinate interconversio; the fumarate reductase is used in anaerobic growth, and the succinate dehydrogenase is used in aerobic growth. Belongs to the succinate dehydrogenase/fumarate reductase iron-sulfur protein family; Contains 1 2Fe-2S ferredoxin-type domain; Contains 1 4Fe-4S ferredoxin-ty…
20	POG_GCA_000264555.1_00504	DLAT,aceF,pdhC,PCHLO6_RS02510	C:COG0508	K00627	Dihydrolipoyllysine-residue acetyltransferase	Acyltransferase; Glycolysis; Lipoyl; Repeat; Transferase.	The pyruvate dehydrogenase complex catalyzes the overall conversion of pyruvate to acetyl-CoA and CO(2). It contains multiple copies of three enzymatic components: pyruvate dehydrogenase (E1), dihydrolipoamide acetyltransferase (E2) and lipoamide dehydrogenase (E3). Belongs to the 2-oxoacid dehydrogenase family; Contains 2 lipoyl-binding domains.; KEGG: wbr:aceF pyruvate dehydrogenase E2 componen…
20	POG_GCA_000264555.1_02550	DBT,bkdB,PCHLO6_RS12665	C:COG0508	K09699	Dihydrolipoyllysine-residue (2-methylpropanoyl)transferase	Acyltransferase; Glycolysis; Lipoyl; Transferase.	The branched-chain alpha-keto dehydrogenase complex catalyzes the overall conversion of alpha-keto acids to acyl-CoA and CO(2). It contains multiple copies of three enzymatic components: branched-chain alpha-keto acid decarboxylase (E1), lipoamide acyltransferase (E2) and lipoamide dehydrogenase (E3) (By similarity); Belongs to the 2-oxoacid dehydrogenase family; Contains 1 lipoyl-binding domain.…
20	POG_GCA_000264555.1_01814	DLST,sucB,PCHLO6_RS09035	C:COG0508	K00658	Dihydrolipoyllysine-residue succinyltransferase	Acyltransferase; Lipoyl; Transferase; Tricarboxylic acid cycle.	The 2-oxoglutarate dehydrogenase complex catalyzes the overall conversion of 2-oxoglutarate to succinyl-CoA and CO(2). It contains multiple copies of 3 enzymatic components: 2-oxoglutarate dehydrogenase (E1), dihydrolipoamide succinyltransferase (E2) and lipoamide dehydrogenase (E3). Belongs to the 2-oxoacid dehydrogenase family; Contains 1 lipoyl-binding domain.; KEGG: pae:PA1586 2-oxoglutarate …
20	POG_GCA_000264555.1_01060	DLST,sucB,PCHLO6_RS05280	C:COG0508	K00658	Dihydrolipoyllysine-residue succinyltransferase		KEGG: strf:ASR50_10630 2-oxoglutarate dehydrogenase E2 component (dihydrolipoamide succinyltransferase)
20	POG_GCA_000264555.1_03986	IDH1,IDH2,icd,PCHLO6_RS19695	C:COG0538	K00031	Isocitrate dehydrogenase (NADP(+))	Glyoxylate bypass; Magnesium; Metal-binding; NADP; Oxidoreductase; Phosphoprotein; Secreted; Tricarboxylic acid cycle.	Belongs to the isocitrate and isopropylmalate dehydrogenases family.; KEGG: pfl:PFL_3888 isocitrate dehydrogenase
20	POG_GCA_000264555.1_00758	antC,PCHLO6_RS03755	C:COG0543	K11311	Ferredoxin--NAD(+) reductase	2Fe-2S; Aromatic hydrocarbons catabolism; FAD; Flavoprotein; Iron; Iron-sulfur; Metal-binding; NAD; Oxidoreductase.	Electron transfer component of anthranilate 1,2- dioxygenase system; Belongs to the bacterial ring-hydroxylating dioxygenase ferredoxin reductase family; Contains 1 2Fe-2S ferredoxin-type domain; Contains 1 FAD-binding FR-type domain.; KEGG: pre:PCA10_14960 anthranilate 1,2-dioxygenase reductase component; With NAD(+) or NADP(+) as acceptor
19	POG_GCA_000264555.1_04162	benC-xylZ,PCHLO6_RS20575	C:COG0543	K05784	Ferredoxin--NAD(+) reductase	2Fe-2S; Aromatic hydrocarbons catabolism; FAD; Flavoprotein; Iron; Iron-sulfur; Metal-binding; NAD; Oxidoreductase.	Electron transfer component of benzoate 1,2-dioxygenase system. Belongs to the bacterial ring-hydroxylating dioxygenase ferredoxin reductase family; Contains 1 2Fe-2S ferredoxin-type domain; Contains 1 FAD-binding FR-type domain.; KEGG: pfl:PFL_3856 benzoate/toluate 1,2-dioxygenase reductase component; With NAD(+) or NADP(+) as acceptor
20	POG_GCA_000264555.1_05968	ascD,ddhD,rfbI,PCHLO6_RS29540	C:COG0543	K00523	CDP-4-dehydro-6-deoxyglucose reductase	2Fe-2S; Dioxygenase; FAD; Flavoprotein; Iron; Iron-sulfur; Metal-binding; NAD; Oxidoreductase.	Component of the terephthalate 1,2-dioxygenase multicomponent enzyme system which catalyzes the dioxygenation of terephthalate (TER/TPA) to 1,2-dihydroxy-3,5-cyclohexadiene-1,4- dicarboxylic acid (DCD). TphA1 probably reduces TphA2A3. It can also use 2,5-dicarboxypyridine (PDC) and 1,4- napthalenedicarboxylic acid (NDC) as substrates, and preferentially uses NADPH which is the physiological elect…
20	POG_GCA_000264555.1_04844	PCHLO6_RS23960	C:COG0543	K15983	3-ketosteroid 9-alpha-monooxygenase	2Fe-2S; Electron transport; Iron; Iron-sulfur; Metal-binding; Transport.	Ferredoxins are iron-sulfur proteins that transfer electrons in a wide variety of metabolic reactions. Belongs to the 2Fe2S plant-type ferredoxin family; Contains 1 2Fe-2S ferredoxin-type domain.
20	POG_GCA_000264555.1_04914	glpK,GK,PCHLO6_RS24310	C:COG0554	K00864	Glycerol kinase	ATP-binding; Glycerol metabolism; Kinase; Nucleotide-binding; Transferase.	Key enzyme in the regulation of glycerol uptake and metabolism. Catalyzes the phosphorylation of glycerol to yield sn- glycerol 3-phosphate; Belongs to the FGGY kinase family.; KEGG: pfl:PFL_4868 glycerol kinase
20	POG_GCA_000264555.1_01813	OGDH,sucA,PCHLO6_RS09030	C:COG0567	K00164	Oxoglutarate dehydrogenase (succinyl-transferring)	Glycolysis; Oxidoreductase; Thiamine pyrophosphate.	The 2-oxoglutarate dehydrogenase complex catalyzes the overall conversion of 2-oxoglutarate to succinyl-CoA and CO(2). It contains multiple copies of three enzymatic components: 2- oxoglutarate dehydrogenase (E1), dihydrolipoamide succinyltransferase (E2) and lipoamide dehydrogenase (E3). Belongs to the alpha-ketoglutarate dehydrogenase family.; KEGG: pae:PA1585 2-oxoglutarate dehydrogenase E1 co…
20	POG_GCA_000264555.1_04916	glpA,glpD,PCHLO6_RS24320	C:COG0578	K00111	Glycerol-3-phosphate dehydrogenase	Cytoplasm; FAD; Flavoprotein; Glycerol metabolism; Oxidoreductase.	Belongs to the FAD-dependent glycerol-3-phosphate dehydrogenase family.; KEGG: pfl:PFL_4870 glycerol-3-phosphate dehydrogenase
20	POG_GCA_000264555.1_00529	glpA,glpD,PCHLO6_RS02635	C:COG0578	K00111	Glycerol-3-phosphate dehydrogenase		KEGG: bav:BAV2011 glycerol-3-phosphate dehydrogenase
20	POG_GCA_000264555.1_03961	mqo,PCHLO6_RS19570	C:COG0579	K00116	Malate dehydrogenase (quinone)	FAD; Flavoprotein; Oxidoreductase; Tricarboxylic acid cycle.	Belongs to the MQO family.; KEGG: psb:Psyr_2387 malate dehydrogenase (quinone)
20	POG_GCA_000264555.1_05167	mqo,PCHLO6_RS25565	C:COG0579	K00116	Malate dehydrogenase (quinone)	FAD; Flavoprotein; Oxidoreductase; Tricarboxylic acid cycle.	Belongs to the MQO family.; KEGG: pst:PSPTO_1136 malate dehydrogenase (quinone)
20	POG_GCA_000264555.1_02905	lhgO,PCHLO6_RS14400	C:COG0579	K15736	L-2-hydroxyglutarate oxidase LhgO	FAD; Flavoprotein; Oxidoreductase.	Oxidizes L-2-hydroxyglutarate, probably to recover alpha-ketoglutarate mistakenly reduced by other enzymes or formed during growth on propionate; Belongs to the L2HGDH family.; KEGG: vch:VCA0147 L-2-hydroxyglutarate oxidase; With oxygen as acceptor
20	POG_GCA_000264555.1_04667	glpQ,ugpQ,PCHLO6_RS23090	C:COG0584	K01126	Glycerophosphodiester phosphodiesterase	Calcium; Glycerol metabolism; Hydrolase; Metal-binding.	Glycerophosphoryl diester phosphodiesterase hydrolyzes deacylated phospholipids to G3P and the corresponding alcohols; Belongs to the glycerophosphoryl diester phosphodiesterase family; Contains 1 GP-PDE domain.; KEGG: pch:EY04_23040 glycerophosphoryl diester phosphodiesterase
17	POG_GCA_000264555.1_02862	glpQ,ugpQ,PCHLO6_RS14195	C:COG0584	K01126	Glycerophosphodiester phosphodiesterase	Signal.	Contains 1 GP-PDE domain.; KEGG: pfl:PFL_3296 glycerophosphoryl diester phosphodiesterase
20	POG_GCA_000264555.1_02073	glpQ,ugpQ,PCHLO6_RS10315	C:COG0584	K01126	Glycerophosphodiester phosphodiesterase	Calcium; Glycerol metabolism; Hydrolase; Metal-binding.	Glycerophosphoryl diester phosphodiesterase hydrolyzes deacylated phospholipids to sn-glycerol 3-phosphate (G3P) and the corresponding alcohols; Belongs to the glycerophosphoryl diester phosphodiesterase family; Contains 1 GP-PDE domain.; KEGG: pae:PA2990 glycerophosphoryl diester phosphodiesterase
20	POG_GCA_000264555.1_03418	qor,CRYZ,PCHLO6_RS16920	C:COG0604	K00344	NADPH:quinone reductase	Oxidoreductase; Phosphoprotein.	Belongs to the zinc-containing alcohol dehydrogenase family. Quinone oxidoreductase subfamily.; KEGG: pen:PSEEN2630 NADPH2:quinone reductase
20	POG_GCA_000264555.1_00707	qor,CRYZ,PCHLO6_RS03510	C:COG0604	K00344	NADPH:quinone reductase	NADP; Oxidoreductase.	Belongs to the zinc-containing alcohol dehydrogenase family. Quinone oxidoreductase subfamily.; KEGG: psu:Psesu_2276 NADPH2:quinone reductase
11	POG_GCA_000264555.1_04199	qor,CRYZ,PCHLO6_RS20755	C:COG0604	K00344	NADPH:quinone reductase	NADP; Oxidoreductase.	Belongs to the zinc-containing alcohol dehydrogenase family. Quinone oxidoreductase subfamily.; KEGG: bur:Bcep18194_B1971 NADPH2:quinone reductase
19	POG_GCA_000264555.1_03539	acuI,PCHLO6_RS17510	C:COG0604	K19745	Acrylyl-CoA reductase AcuI	Cytoplasm; NADP; Oxidoreductase.	Catalyzes the NADPH-dependent reduction of acrylyl-CoA to propanoyl-CoA. Is essential for growth with 3-hydroxypropanoate as a sole carbon source. Restores acrylate resistance when expressed in the E.coli strain K12 acuI deletion; Belongs to the zinc-containing alcohol dehydrogenase family. Acrylyl-CoA reductase subfamily.; KEGG: lri:NCTC12151_03209 acrylyl-CoA reductase (NADPH); With NAD(+) or N…
20	POG_GCA_000264555.1_00030	qor,CRYZ,PCHLO6_RS00150	C:COG0604	K00344	NADPH:quinone reductase	NADP; Oxidoreductase.	Belongs to the zinc-containing alcohol dehydrogenase family. Quinone oxidoreductase subfamily.; KEGG: sehc:A35E_00484 NADPH2:quinone reductase
20	POG_GCA_000264555.1_05965	qor,CRYZ,PCHLO6_RS29525	C:COG0604	K00344	NADPH:quinone reductase	Cytoplasm; Metal-binding; NAD; Oxidoreductase; Zinc.	Belongs to the zinc-containing alcohol dehydrogenase family.; KEGG: pae:PA5234 NADPH2:quinone reductase
17	POG_GCA_000264555.1_03608	qor,CRYZ,PCHLO6_RS17850	C:COG0604	K00344	NADPH:quinone reductase	NADP; Oxidoreductase.	Belongs to the zinc-containing alcohol dehydrogenase family. Quinone oxidoreductase subfamily.; KEGG: pch:EY04_17525 NADPH2:quinone reductase
20	POG_GCA_000264555.1_04517	qor,CRYZ,PCHLO6_RS22345	C:COG0604	K00344	NADPH:quinone reductase	Fatty acid metabolism; Lipid metabolism; Multifunctional enzyme; NADP; Oxidoreductase; Phosphopantetheine; Phosphoprotein; Transferase.	Involved in the elongation of either C22-24 fatty acids or p-hydroxyphenylalkanoic acids by the addition of malonyl-CoA and methylmalonyl-CoA extender units to yield phthiocerol and phenolphthiocerol derivatives, respectively; Contains 1 acyl carrier domain.; KEGG: srd:SD10_08565 NADPH2:quinone reductase
20	POG_GCA_000264555.1_02345	qor,CRYZ,PCHLO6_RS11650	C:COG0604	K00344	NADPH:quinone reductase	Cytoplasm; Nucleus; Oxidoreductase.	Belongs to the zinc-containing alcohol dehydrogenase family. Quinone oxidoreductase subfamily.; KEGG: srd:SD10_08565 NADPH2:quinone reductase
20	POG_GCA_000264555.1_05000	PCHLO6_RS24740	C:COG0633	K04755	2Fe-2S ferredoxin	2Fe-2S; Electron transport; Iron; Iron-sulfur; Metal-binding; Transport.	Ferredoxin are iron-sulfur proteins that transfer electrons in a wide variety of metabolic reactions. Belongs to the adrenodoxin/putidaredoxin family; Contains 1 2Fe-2S ferredoxin-type domain.
20	POG_GCA_000264555.1_06302	,	C:COG0636	K02110	ATP synthase subunit c	ATP synthesis; Cell inner membrane; Cell membrane; CF(0); Hydrogen ion transport; Ion transport; Lipid-binding; Membrane; Transmembrane; Transmembrane helix; Transport.	F(1)F(0) ATP synthase produces ATP from ADP in the presence of a proton or sodium gradient. F-type ATPases consist of two structural domains, F(1) containing the extramembraneous catalytic core and F(0) containing the membrane proton channel, linked together by a central stalk and a peripheral stalk. During catalysis, ATP synthesis in the catalytic domain of F(1) is coupled via a rotary mechanism…
20	POG_GCA_000264555.1_01930	ETFDH,PCHLO6_RS09605	C:COG0644	K00311	Electron-transferring-flavoprotein dehydrogenase	4Fe-4S; Electron transport; FAD; Flavoprotein; Iron; Iron-sulfur; Metal-binding; Oxidoreductase; Transport; Ubiquinone.	Accepts electrons from ETF and reduces ubiquinone; Belongs to the ETF-QO/FixC family; Contains 1 4Fe-4S ferredoxin-type domain.; KEGG: gqu:AWC35_03355 electron-transferring-flavoprotein dehydrogenase
20	POG_GCA_000264555.1_00474	PCHLO6_RS02360	C:COG0644	K16033	Tryptophan 2-halogenase	Monooxygenase; Oxidoreductase.	Involved in the incorporation of a chlorinated tryptophan residue into halogenated forms of the secondary metabolites called chondramides.
20	POG_GCA_000264555.1_03998	nuoCD,PCHLO6_RS19755	C:COG0649|C:COG0852	K13378	NADH:ubiquinone reductase (H(+)-translocating)	Cell inner membrane; Cell membrane; Membrane; Multifunctional enzyme; NAD; Oxidoreductase; Quinone; Transport; Ubiquinone.	NDH-1 shuttles electrons from NADH, via FMN and iron- sulfur (Fe-S) centers, to quinones in the respiratory chain. The immediate electron acceptor for the enzyme in this species is believed to be ubiquinone. Couples the redox reaction to proton translocation (for every two electrons transferred, four hydrogen ions are translocated across the cytoplasmic membrane), and thus conserves the redox ene…
20	POG_GCA_000264555.1_00280	gpr,PCHLO6_RS01400	C:COG0667	K19265	L-glyceraldehyde 3-phosphate reductase	Oxidoreductase.	Catalyzes the stereospecific, NADPH-dependent reduction of L-glyceraldehyde 3-phosphate (L-GAP). The physiological role of gpr is the detoxification of L-GAP, which may be formed by non- enzymatic racemization of GAP. Also involved in the stress response as a methylglyoxal reductase which converts the toxic metabolite methylglyoxal to acetol in vitro and in vivo (By similarity); Belongs to the sh…
20	POG_GCA_000264555.1_05119	PCHLO6_RS25325	C:COG0667	K05882	Aryl-alcohol dehydrogenase (NADP(+))	Coiled coil; NADP; Oxidoreductase.	Belongs to the aldo/keto reductase family. Aldo/keto reductase 2 subfamily.; KEGG: bra:BRADO6605 aryl-alcohol dehydrogenase (NADP+)
20	POG_GCA_000264555.1_03510	PCHLO6_RS17375	C:COG0667	K05882	Aryl-alcohol dehydrogenase (NADP(+))	Coiled coil; NADP; Oxidoreductase.	Belongs to the aldo/keto reductase family. Aldo/keto reductase 2 subfamily.; KEGG: bcj:BCAM0042 aryl-alcohol dehydrogenase (NADP+)
17	POG_GCA_000264555.1_02995	PCHLO6_RS14845	C:COG0667	K05275	Pyridoxine 4-dehydrogenase	NADP; Oxidoreductase.	May interfere with the nodulation process and inhibits nodule development; Belongs to the aldo/keto reductase 13 family.; KEGG: bur:Bcep18194_B1236 pyridoxine 4-dehydrogenase
20	POG_GCA_000264555.1_00528	PCHLO6_RS02630	C:COG0667	K07079	uncharacterized protein
20	POG_GCA_000264555.1_06301	PCHLO6_RS31185	C:COG0711	K02109	ATP synthase subunit b 1	ATP synthesis; Cell inner membrane; Cell membrane; CF(0); Hydrogen ion transport; Ion transport; Membrane; Transmembrane; Transmembrane helix; Transport.	F(1)F(0) ATP synthase produces ATP from ADP in the presence of a proton or sodium gradient. F-type ATPases consist of two structural domains, F(1) containing the extramembraneous catalytic core and F(0) containing the membrane proton channel, linked together by a central stalk and a peripheral stalk. During catalysis, ATP synthesis in the catalytic domain of F(1) is coupled via a rotary mechanism…
20	POG_GCA_000264555.1_06300	PCHLO6_RS31180	C:COG0712	K02113	ATP synthase subunit delta 1	ATP synthesis; Cell inner membrane; Cell membrane; CF(1); Hydrogen ion transport; Ion transport; Membrane; Transport.	F(1)F(0) ATP synthase produces ATP from ADP in the presence of a proton or sodium gradient. F-type ATPases consist of two structural domains, F(1) containing the extramembraneous catalytic core and F(0) containing the membrane proton channel, linked together by a central stalk and a peripheral stalk. During catalysis, ATP synthesis in the catalytic domain of F(1) is coupled via a rotary mechanism…
20	POG_GCA_000264555.1_04005	nuoK,PCHLO6_RS19790	C:COG0713	K00340	NADH:ubiquinone reductase (H(+)-translocating)	Cell inner membrane; Cell membrane; Membrane; NAD; Oxidoreductase; Quinone; Transmembrane; Transmembrane helix; Transport; Ubiquinone.	NDH-1 shuttles electrons from NADH, via FMN and iron- sulfur (Fe-S) centers, to quinones in the respiratory chain. The immediate electron acceptor for the enzyme in this species is believed to be ubiquinone. Couples the redox reaction to proton translocation (for every two electrons transferred, four hydrogen ions are translocated across the cytoplasmic membrane), and thus conserves the redox ene…
20	POG_GCA_000264555.1_00960	PCHLO6_RS04780	C:COG0716	K06205	Uncharacterized protein PA3435	Electron transport; Flavoprotein; FMN; Transport.	Probable electron transporter. Belongs to the flavodoxin family. MioC subfamily; Contains 1 flavodoxin-like domain.
20	POG_GCA_000264555.1_05116	UQCRFS1,RIP1,petA,PCHLO6_RS25310	C:COG0723	K00411	Quinol--cytochrome-c reductase	2Fe-2S; Cell membrane; Disulfide bond; Electron transport; Iron; Iron-sulfur; Membrane; Metal-binding; Oxidoreductase; Transmembrane; Transmembrane helix; Transport.	Component of the ubiquinol-cytochrome c reductase complex (complex III or cytochrome b-c1 complex), which is a respiratory chain that generates an electrochemical potential coupled to ATP synthesis. Contains 1 Rieske domain.; KEGG: pae:PA4431 ubiquinol-cytochrome c reductase iron-sulfur subunit
20	POG_GCA_000264555.1_04556	bluB,PCHLO6_RS22540	C:COG0778	K04719	5,6-dimethylbenzimidazole synthase	Cobalamin biosynthesis; Flavoprotein; FMN; NAD; NADP; Nucleotide-binding; Oxidoreductase.	Involved in the biosynthesis of cobalamin (vitamin B12). Catalyzes the oxidative fragmentation and contraction of the isoalloxazine heterocycle and the cleavage of the ribityl tail of FMNH(2) to form 5,6-dimethylbenzimidazole (DMB) and D-erythrose 4- phosphate (E4P). NAD(P)H is only required initially to reduce FMN and oxygen drives the oxidative fragmentation; Belongs to the BluB family.; KEGG: …
20	POG_GCA_000264555.1_01576	rutE,PCHLO6_RS07850	C:COG0778	K09019	hypothetical protein		KEGG: psee:FRP1_10575 3-hydroxypropanoate dehydrogenase; With NAD(+) or NADP(+) as acceptor
20	POG_GCA_000264555.1_01674	PCHLO6_RS08345	C:COG0778		Putative NAD(P)H nitroreductase YdjA	Flavoprotein; FMN; NAD; NADP; Oxidoreductase.	Belongs to the nitroreductase family.
20	POG_GCA_000264555.1_05004	PCHLO6_RS24760	C:COG0822	K04488	Iron-sulfur cluster assembly scaffold protein IscU		A scaffold on which IscS assembles Fe-S clusters. Cluster assembly on IscU homodimers proceeds sequentially from 1 2Fe-2S per dimer, to 2 2Fe-2S per dimer and finally 1 4Fe-4S per dimer. Subsequently IscU transfers the Fe-S cluster to other acceptor proteins. It is likely that Fe-S cluster coordination is flexible as the role of this complex is to build and then hand off Fe-S clusters. The cluste…
20	POG_GCA_000264555.1_03996	nuoA,PCHLO6_RS19745	C:COG0838	K00330	NADH:ubiquinone reductase (H(+)-translocating)	Cell inner membrane; Cell membrane; Membrane; NAD; Oxidoreductase; Quinone; Transmembrane; Transmembrane helix; Transport; Ubiquinone.	NDH-1 shuttles electrons from NADH, via FMN and iron- sulfur (Fe-S) centers, to quinones in the respiratory chain. The immediate electron acceptor for the enzyme in this species is believed to be ubiquinone. Couples the redox reaction to proton translocation (for every two electrons transferred, four hydrogen ions are translocated across the cytoplasmic membrane), and thus conserves the redox ene…
20	POG_GCA_000264555.1_04004	nuoJ,PCHLO6_RS19785	C:COG0839	K00339	NADH:ubiquinone reductase (H(+)-translocating)	Cell inner membrane; Cell membrane; Membrane; NAD; Oxidoreductase; Quinone; Transmembrane; Transmembrane helix; Ubiquinone.	NDH-1 shuttles electrons from NADH, via FMN and iron- sulfur (Fe-S) centers, to quinones in the respiratory chain. The immediate electron acceptor for the enzyme in this species is believed to be ubiquinone. Couples the redox reaction to proton translocation (for every two electrons transferred, four hydrogen ions are translocated across the cytoplasmic membrane), and thus conserves the redox ene…
20	POG_GCA_000264555.1_05072	cyoB,PCHLO6_RS25095	C:COG0843	K02298	Ubiquinol oxidase (H(+)-transporting)	Cell membrane; Copper; Electron transport; Heme; Hydrogen ion transport; Ion transport; Iron; Membrane; Metal-binding; Oxidoreductase; Respiratory chain; Transmembrane; Transmembrane helix; Transport.	Cytochrome bo(3) ubiquinol terminal oxidase is the component of the aerobic respiratory chain of E.coli that predominates when cells are grown at high aeration. Has proton pump activity across the membrane in addition to electron transfer, pumping 2 protons/electron (By similarity); Belongs to the heme-copper respiratory oxidase family.; KEGG: eco:b0431 cytochrome o ubiquinol oxidase subunit I
20	POG_GCA_000264555.1_00066	coxA,ctaD,PCHLO6_RS00330	C:COG0843	K02274	Cytochrome-c oxidase	Endonuclease; Hydrolase; Intron homing; Membrane; Mitochondrion; Nuclease; Transmembrane; Transmembrane helix.	Mitochondrial DNA endonuclease involved in intron homing; In the C-terminal sectio; belongs to the LAGLIDADG endonuclease family; In the N-terminal sectio; belongs to the heme-copper respiratory oxidase family.; KEGG: pch:EY04_29180 cytochrome c oxidase subunit I
20	POG_GCA_000264555.1_04002	nuoH,PCHLO6_RS19775	C:COG1005	K00337	NADH:ubiquinone reductase (H(+)-translocating)	Cell inner membrane; Cell membrane; Membrane; NAD; Oxidoreductase; Quinone; Transmembrane; Transmembrane helix; Ubiquinone.	NDH-1 shuttles electrons from NADH, via FMN and iron- sulfur (Fe-S) centers, to quinones in the respiratory chain. The immediate electron acceptor for the enzyme in this species is believed to be ubiquinone. Couples the redox reaction to proton translocation (for every two electrons transferred, four hydrogen ions are translocated across the cytoplasmic membrane), and thus conserves the redox ene…
20	POG_GCA_000264555.1_04008	nuoN,PCHLO6_RS19805	C:COG1007	K00343	NADH:ubiquinone reductase (H(+)-translocating)	Cell inner membrane; Cell membrane; Membrane; NAD; Oxidoreductase; Quinone; Transmembrane; Transmembrane helix; Transport; Ubiquinone.	NDH-1 shuttles electrons from NADH, via FMN and iron- sulfur (Fe-S) centers, to quinones in the respiratory chain. The immediate electron acceptor for the enzyme in this species is believed to be ubiquinone. Couples the redox reaction to proton translocation (for every two electrons transferred, four hydrogen ions are translocated across the cytoplasmic membrane), and thus conserves the redox ene…
20	POG_GCA_000264555.1_04007	nuoM,PCHLO6_RS19800	C:COG1008	K00342	NADH:ubiquinone reductase (H(+)-translocating)	Cell inner membrane; Cell membrane; Membrane; NAD; Oxidoreductase; Quinone; Transmembrane; Transmembrane helix; Ubiquinone.	NDH-1 shuttles electrons from NADH, via FMN and iron- sulfur (Fe-S) centers, to quinones in the respiratory chain. The immediate electron acceptor for the enzyme in this species is believed to be ubiquinone. Couples the redox reaction to proton translocation (for every two electrons transferred, four hydrogen ions are translocated across the cytoplasmic membrane), and thus conserves the redox ene…
20	POG_GCA_000264555.1_04006	nuoL,PCHLO6_RS19795	C:COG1009	K00341	NADH:ubiquinone reductase (H(+)-translocating)	Cell inner membrane; Cell membrane; Membrane; NAD; Oxidoreductase; Quinone; Transmembrane; Transmembrane helix; Ubiquinone.	NDH-1 shuttles electrons from NADH, via FMN and iron- sulfur (Fe-S) centers, to quinones in the respiratory chain. The immediate electron acceptor for the enzyme in this species is believed to be ubiquinone. Couples the redox reaction to proton translocation (for every two electrons transferred, four hydrogen ions are translocated across the cytoplasmic membrane), and thus conserves the redox ene…
20	POG_GCA_000264555.1_02639	PCHLO6_RS13095	C:COG1009|P:COG2111	K05559	Probable K(+)/H(+) antiporter subunit A/B	Antiport; Cell membrane; Hydrogen ion transport; Ion transport; Membrane; Potassium; Potassium transport; Transmembrane; Transmembrane helix; Transport.	Part of a K(+) efflux system which is required for the adaptation of R.meliloti to alkaline pH as well as for the infection process during symbiotic nodule development. In the N-terminal sectio; belongs to the CPA3 antiporters (TC 2.A.63) subunit A family; In the C-terminal sectio; belongs to the CPA3 antiporters (TC 2.A.63) subunit B family.
20	POG_GCA_000264555.1_03923	gapN,PCHLO6_RS19390	C:COG1012	K00131	Glyceraldehyde-3-phosphate dehydrogenase (NADP(+))	NAD; Oxidoreductase.	Catalyzes the oxidation of 1-pyrroline, which is spontaneously formed from 4-aminobutanal, leading to 4- aminobutanoate (GABA); Belongs to the aldehyde dehydrogenase family. Gamma- aminobutyraldehyde dehydrogenase subfamily.; KEGG: pch:EY04_19140 glyceraldehyde-3-phosphate dehydrogenase (NADP+)
20	POG_GCA_000264555.1_00751	mmsA,iolA,ALDH6A1,PCHLO6_RS03720	C:COG1012	K00140	Malonate-semialdehyde dehydrogenase (acetylating)	Mitochondrion; NAD; Oxidoreductase; RNA-binding; Transit peptide.	Could have an RNA-binding activity in addition of its catalytic role. Belongs to the aldehyde dehydrogenase family.; KEGG: pch:EY04_03120 malonate-semialdehyde dehydrogenase (acetylating) / methylmalonate-semialdehyde dehydrogenase
19	POG_GCA_000264555.1_03426	puuC,aldH	C:COG1012	K09472	4-(gamma-glutamylamino)butanal dehydrogenase	Mitochondrion; NAD; Oxidoreductase; RNA-binding; Transit peptide.	Could have an RNA-binding activity in addition of its catalytic role. Belongs to the aldehyde dehydrogenase family.; KEGG: pch:EY04_16385 4-(gamma-glutamylamino)butanal dehydrogenase
20	POG_GCA_000264555.1_05504	aldB,PCHLO6_RS27230	C:COG1012	K00138	Probable aldehyde dehydrogenase	NAD; Oxidoreductase.	Belongs to the aldehyde dehydrogenase family.; KEGG: kox:KOX_00375 aldehyde dehydrogenase; With NAD(+) or NADP(+) as acceptor
19	POG_GCA_000264555.1_02613	mmsA,iolA,ALDH6A1,PCHLO6_RS12970	C:COG1012	K00140	Malonate-semialdehyde dehydrogenase (acetylating)	NAD; Oxidoreductase.	Involved in the degradation of beta-alanine; Belongs to the aldehyde dehydrogenase family.; KEGG: pch:EY04_11795 malonate-semialdehyde dehydrogenase (acetylating) / methylmalonate-semialdehyde dehydrogenase
20	POG_GCA_000264555.1_06125	kauB,PCHLO6_RS30310	C:COG1012	K12254	Aldehyde dehydrogenase family 2 member C4	Cytoplasm; NAD; Oxidoreductase; Ubl conjugation.	Involved in ferulic acid and sinapic acid biosynthesis by oxidation of conyferylaldehyde and sinapaldehyde, respectively. Can oxidize L-lactaldehyde. Possesses activity on acetaldehyde and glycolaldehyde in vitro; Belongs to the aldehyde dehydrogenase family.; KEGG: pae:PA5312 4-guanidinobutyraldehyde dehydrogenase / NAD-dependent aldehyde dehydrogenase; Gamma-guanidinobutyraldehyde dehydrogenase
20	POG_GCA_000264555.1_00734	mmsA,iolA,ALDH6A1,PCHLO6_RS03650	C:COG1012	K00140	Malonate-semialdehyde dehydrogenase (acetylating)	NAD; Oxidoreductase.	Involved in the degradation of beta-alanine; Belongs to the aldehyde dehydrogenase family.; KEGG: pfo:Pfl01_0686 malonate-semialdehyde dehydrogenase (acetylating) / methylmalonate-semialdehyde dehydrogenase
18	POG_GCA_000264555.1_04264	feaB,PCHLO6_RS21075	C:COG1012	K00146	Phenylacetaldehyde dehydrogenase	Acetylation; Mitochondrion; NADP; One-carbon metabolism; Oxidoreductase; Phosphopantetheine; Phosphoprotein; Transit peptide.	In the N-terminal sectio; belongs to the GART family; In the C-terminal sectio; belongs to the aldehyde dehydrogenase family. ALDH1L subfamily; Contains 1 acyl carrier domain.; KEGG: pch:EY04_20920 phenylacetaldehyde dehydrogenase
19	POG_GCA_000264555.1_02427	kauB,PCHLO6_RS12060	C:COG1012	K12254	Aldehyde dehydrogenase family 2 member C4	Cytoplasm; NAD; Oxidoreductase; Ubl conjugation.	Involved in ferulic acid and sinapic acid biosynthesis by oxidation of conyferylaldehyde and sinapaldehyde, respectively. Can oxidize L-lactaldehyde. Possesses activity on acetaldehyde and glycolaldehyde in vitro; Belongs to the aldehyde dehydrogenase family.; KEGG: pprc:PFLCHA0_c24080 4-guanidinobutyraldehyde dehydrogenase / NAD-dependent aldehyde dehydrogenase; Gamma-guanidinobutyraldehyde dehy…
18	POG_GCA_000264555.1_01119	betB,gbsA,PCHLO6_RS05575	C:COG1012	K00130	Betaine-aldehyde dehydrogenase	NAD; Oxidoreductase.	Catalyzes the oxidation of 1-pyrroline, which is spontaneously formed from 4-aminobutanal, leading to 4- aminobutanoate (GABA); Belongs to the aldehyde dehydrogenase family. Gamma- aminobutyraldehyde dehydrogenase subfamily.; KEGG: pfo:Pfl01_1049 betaine-aldehyde dehydrogenase
20	POG_GCA_000264555.1_00593	ALDH,PCHLO6_RS02950	C:COG1012	K00128	Aldehyde dehydrogenase (NAD(+))	NAD; Oxidoreductase.	Belongs to the aldehyde dehydrogenase family. RocA subfamily.; KEGG: pre:PCA10_51510 aldehyde dehydrogenase (NAD+)
20	POG_GCA_000264555.1_03403	feaB,PCHLO6_RS16845	C:COG1012	K00146	Phenylacetaldehyde dehydrogenase	NAD; Oxidoreductase.	Acts almost equally well on phenylacetaldehyde, 4- hydroxyphenylacetaldehyde and 3,4-dihydroxyphenylacetaldehyde. Belongs to the aldehyde dehydrogenase family.; KEGG: pre:PCA10_16480 phenylacetaldehyde dehydrogenase
18	POG_GCA_000264555.1_02709	ALDH,PCHLO6_RS13430	C:COG1012	K00128	Aldehyde dehydrogenase (NAD(+))	Cytoplasm; NADP; Oxidoreductase; Stress response.	Important as a means of generating NADPH for biosynthetic reactions. May be a main source of cytosolic NADPH for mannitol biosynthesis in leaves; Belongs to the aldehyde dehydrogenase family.; KEGG: pch:EY04_12280 aldehyde dehydrogenase (NAD+)
20	POG_GCA_000264555.1_05770	betB,gbsA,PCHLO6_RS28555	C:COG1012	K00130	Betaine-aldehyde dehydrogenase	Metal-binding; NAD; NADP; Oxidation; Oxidoreductase; Potassium.	Involved in the biosynthesis of the osmoprotectant glycine betaine. Catalyzes the reversible oxidation of betaine aldehyde to the corresponding acid; Belongs to the aldehyde dehydrogenase family.; KEGG: pae:PA5373 betaine-aldehyde dehydrogenase
20	POG_GCA_000264555.1_04638	astD,PCHLO6_RS22945	C:COG1012	K06447	Succinylglutamate-semialdehyde dehydrogenase	Arginine metabolism; NAD; Oxidoreductase.	Catalyzes the NAD-dependent reduction of succinylglutamate semialdehyde into succinylglutamate; Belongs to the aldehyde dehydrogenase family. AstD subfamily.; KEGG: por:APT59_07530 succinylglutamic semialdehyde dehydrogenase
20	POG_GCA_000264555.1_03498	hpaE,hpcC,PCHLO6_RS17315	C:COG1012	K00151	5-carboxymethyl-2-hydroxymuconic-semialdehyde dehydrogenase	Aromatic hydrocarbons catabolism; Oxidoreductase.	Transforms 5-carboxymethyl-2-hydroxy-muconic semialdehyde (CHMS) into 5-carboxymethyl-2-hydroxy-muconic acid (CHM). Belongs to the aldehyde dehydrogenase family.; KEGG: pmu:PM1530 5-carboxymethyl-2-hydroxymuconic-semialdehyde dehydrogenase
19	POG_GCA_000264555.1_04855	betB,gbsA,PCHLO6_RS24015	C:COG1012	K00130	Betaine-aldehyde dehydrogenase	NAD; Oxidoreductase; Stress response.	Belongs to the aldehyde dehydrogenase family.; KEGG: pch:EY04_24520 betaine-aldehyde dehydrogenase
18	POG_GCA_000264555.1_00894	xylA,PCHLO6_RS04445	C:COG1012	K22187	N-succinylglutamate 5-semialdehyde dehydrogenase 1	Arginine metabolism; NAD; Oxidoreductase.	Catalyzes the NAD-dependent reduction of succinylglutamate semialdehyde into succinylglutamate; Belongs to the aldehyde dehydrogenase family. AstD subfamily.; KEGG: pch:EY04_03840 alpha-ketoglutaric semialdehyde dehydrogenase; With NAD(+) or NADP(+) as acceptor
20	POG_GCA_000264555.1_00204	gabD,PCHLO6_RS01020	C:COG1012	K00135	Succinate-semialdehyde dehydrogenase (NAD(P)(+))	NAD; NADP; Oxidoreductase.	Catalyzes the conversion of 5-oxopentanoate (glutarate semialdehyde) to glutarate; Belongs to the aldehyde dehydrogenase family.; KEGG: pva:Pvag_1891 succinate-semialdehyde dehydrogenase / glutarate-semialdehyde dehydrogenase
20	POG_GCA_000264555.1_05869	PCHLO6_RS29055	C:COG1012	K00154	Coniferyl-aldehyde dehydrogenase	NAD; Oxidoreductase.	Belongs to the aldehyde dehydrogenase family.; KEGG: pae:PA0366 coniferyl-aldehyde dehydrogenase
18	POG_GCA_000264555.1_01114	prr,PCHLO6_RS05550	C:COG1012	K00137	Aminobutyraldehyde dehydrogenase	NAD; Oxidoreductase.	Catalyzes the oxidation of 1-pyrroline, which is spontaneously formed from 4-aminobutanal, leading to 4- aminobutanoate (GABA); Belongs to the aldehyde dehydrogenase family. Gamma- aminobutyraldehyde dehydrogenase subfamily.; KEGG: rox:BV494_23790 aminobutyraldehyde dehydrogenase
9	POG_GCA_000963835.1_03397	ALDH,PCL1606_RS16790	C:COG1012	K00128	Aldehyde dehydrogenase (NAD(+))	Metal-binding; NAD; NADP; Oxidation; Oxidoreductase; Potassium.	Involved in the biosynthesis of the osmoprotectant glycine betaine. Catalyzes the reversible oxidation of betaine aldehyde to the corresponding acid; Belongs to the aldehyde dehydrogenase family.; KEGG: smag:AN936_13240 aldehyde dehydrogenase (NAD+)
20	POG_GCA_000264555.1_03285	sad,PCHLO6_RS16260	C:COG1012	K08324	Succinate-semialdehyde dehydrogenase (NAD(P)(+))	NADP; Oxidoreductase.	Catalyzes the NAD(+)-dependent oxidation of succinate semialdehyde to succinate. It acts preferentially with NAD as cosubstrate but can also use NADP. Prevents the toxic accumulation of succinate semialdehyde (SSA) and plays an important role when arginine and putrescine are used as the sole nitrogen or carbon sources; Belongs to the aldehyde dehydrogenase family.; KEGG: kmi:VW41_10755 succinate-…
20	POG_GCA_000264555.1_05076	hmp,YHB1,PCHLO6_RS25115	C:COG1017|C:COG1018	K05916	Nitric oxide dioxygenase	FAD; Flavoprotein; Heme; Iron; Metal-binding; NAD; NADP; Oxidoreductase; Oxygen transport; Transport.	Belongs to the globin family. Two-domain flavohemoproteins subfamily; In the C-terminal sectio; belongs to the flavoprotein pyridine nucleotide cytochrome reductase family; Contains 1 FAD-binding FR-type domain.; KEGG: pfl:PFL_5040 nitric oxide dioxygenase
20	POG_GCA_000264555.1_05743	PCHLO6_RS28420	C:COG1018	K21832	NADH oxidoreductase HCR	2Fe-2S; Electron transport; FAD; Flavoprotein; Iron; Iron-sulfur; Metal-binding; NAD; Oxidoreductase; Transport.	NADH oxidoreductase acting in concert with HCP. In the N-terminal sectio; belongs to the FAD-binding oxidoreductase type 6 family; Contains 1 2Fe-2S ferredoxin-type domain; Contains 1 FAD-binding FR-type domain.
18	POG_GCA_000264555.1_03035	PCHLO6_RS15035	C:COG1018	K02613	1,2-phenylacetyl-CoA epoxidase, subunit E	2Fe-2S; Electron transport; FAD; Flavoprotein; Iron; Iron-sulfur; Metal-binding; NAD; Oxidoreductase; Transport.	Component of 1,2-phenylacetyl-CoA epoxidase multicomponent enzyme system which catalyzes the reduction of phenylacetyl-CoA (PA-CoA) to form 1,2-epoxyphenylacetyl-CoA. The subunit E is a reductase with a preference for NADPH and FAD, capable of reducing cytochrome c; In the N-terminal sectio; belongs to the FAD-binding oxidoreductase type 6 family; Contains 1 2Fe-2S ferredoxin-type domain; Contain…
18	POG_GCA_000264555.1_05055	PCHLO6_RS25010	C:COG1018	K02613	1,2-phenylacetyl-CoA epoxidase, subunit E	2Fe-2S; Electron transport; FAD; Flavoprotein; Iron; Iron-sulfur; Metal-binding; NAD; Oxidoreductase; Transport.	Component of 1,2-phenylacetyl-CoA epoxidase multicomponent enzyme system which catalyzes the reduction of phenylacetyl-CoA (PA-CoA) to form 1,2-epoxyphenylacetyl-CoA. The subunit E is a reductase with a preference for NADPH and FAD, capable of reducing cytochrome c; In the N-terminal sectio; belongs to the FAD-binding oxidoreductase type 6 family; Contains 1 2Fe-2S ferredoxin-type domain; Contain…
19	POG_GCA_000264555.1_02712	PCHLO6_RS13445	C:COG1018	K03863	Phthalate 4,5-dioxygenase oxygenase reductase subunit	2Fe-2S; Aromatic hydrocarbons catabolism; Electron transport; Flavoprotein; FMN; Iron; Iron-sulfur; Metal-binding; Monooxygenase; NAD; Oxidoreductase; Plasmid; Transport.	Belongs to the PDR/VanB family; Contains 1 2Fe-2S ferredoxin-type domain; Contains 1 FAD-binding FR-type domain.
20	POG_GCA_000264555.1_01311	fpr,PCHLO6_RS06545	C:COG1018	K00528	Ferredoxin--NADP(+) reductase	FAD; Flavoprotein; NADP; Oxidoreductase.	Belongs to the ferredoxin--NADP reductase type 1 family; Contains 1 FAD-binding FR-type domain.; KEGG: pmy:Pmen_1293 ferredoxin/flavodoxin---NADP+ reductase
20	POG_GCA_000264555.1_05406	fpr,PCHLO6_RS26755	C:COG1018	K00528	Ferredoxin--NADP(+) reductase	FAD; Flavoprotein; NADP; Oxidoreductase.	Belongs to the ferredoxin--NADP reductase type 1 family; Contains 1 FAD-binding FR-type domain.; KEGG: ppu:PP_4646 ferredoxin/flavodoxin---NADP+ reductase
20	POG_GCA_000264555.1_06278	PCHLO6_RS31070	C:COG1018|S:COG3576	K07006	uncharacterized protein
20	POG_GCA_000264555.1_00580	PCHLO6_RS02890	C:COG1032		UPF0313 protein PP_4872	4Fe-4S; Iron; Iron-sulfur; Metal-binding; S-adenosyl-L-methionine.	Belongs to the UPF0313 family.
20	POG_GCA_000264555.1_04001	nuoG,PCHLO6_RS19770	C:COG1034	K00336	NADH:ubiquinone reductase (H(+)-translocating)	2Fe-2S; 4Fe-4S; Iron; Iron-sulfur; Metal-binding; NAD; Oxidoreductase; Quinone; Ubiquinone.	NDH-1 shuttles electrons from NADH, via FMN and iron- sulfur (Fe-S) centers, to quinones in the respiratory chain. The immediate electron acceptor for the enzyme in this species is believed to be ubiquinone. Couples the redox reaction to proton translocation (for every two electrons transferred, four hydrogen ions are translocated across the cytoplasmic membrane), and thus conserves the redox ene…
20	POG_GCA_000264555.1_02044	ACO,acnA,PCHLO6_RS10170	C:COG1048	K01681	Aconitate hydratase	4Fe-4S; Iron; Iron-sulfur; Lyase; Metal-binding; RNA-binding; Tricarboxylic acid cycle.	Involved in the catabolism of short chain fatty acids (SCFA) via the tricarboxylic acid (TCA)(acetyl degradation route) and probably the 2-methylcitrate cycle I (propionate degradation route). Catalyzes the reversible isomerization of citrate to isocitrate via cis-aconitate. Could catalyze the hydration of 2- methyl-cis-aconitate to yield (2R,3S)-2-methylisocitrate. The apo form of AcnA functions…
20	POG_GCA_000264555.1_01974	acnD,PCHLO6_RS09825	C:COG1048	K20455	2-methylcitrate dehydratase (2-methyl-trans-aconitate forming)	4Fe-4S; Iron; Iron-sulfur; Lyase; Metal-binding.	Involved in the catabolism of short chain fatty acids (SCFA) via the 2-methylcitrate cycle II (propionate degradation route). In vivo under anaerobic conditions, AcnD catalyzes the stereospecific dehydration of (2S,3S)-methylcitrate (2-MC) to yield the trans isomer of 2-methyl-aconitate (2-MCA). AcnD can also accept citrate and cis-aconitate, but with a lower efficiency. 2-methylisocitrate and is…
20	POG_GCA_000264555.1_02670	acnB,PCHLO6_RS13245	C:COG1049	K01682	Aconitate hydratase	4Fe-4S; Iron; Iron-sulfur; Lyase; Metal-binding; RNA-binding; Tricarboxylic acid cycle.	Involved in the catabolism of short chain fatty acids (SCFA) via the tricarboxylic acid (TCA)(acetyl degradation route) and probably via the 2-methylcitrate cycle I (propionate degradation route). Catalyzes the reversible isomerization of citrate to isocitrate via cis-aconitate. Catalyzes the hydration of 2-methyl-cis-aconitate to yield (2R,3S)-2-methylisocitrate. The apo form of AcnB functions a…
20	POG_GCA_000264555.1_04579	ldhA,PCHLO6_RS22650	C:COG1052	K03778	D-lactate dehydrogenase	Cytoplasm; NAD; Nucleus; Oxidoreductase.	Belongs to the D-isomer specific 2-hydroxyacid dehydrogenase family.; KEGG: pprc:PFLCHA0_c45250 D-lactate dehydrogenase
20	POG_GCA_000264555.1_03477	ghrB,PCHLO6_RS17215	C:COG1052	K00090	Glyoxylate reductase (NADP(+))	Cytoplasm; NAD; NADP; Oxidoreductase.	Catalyzes the NADPH-dependent reduction of glyoxylate and hydroxypyruvate into glycolate and glycerate, respectively; Belongs to the D-isomer specific 2-hydroxyacid dehydrogenase family. GhrB subfamily.; KEGG: prg:RB151_039350 glyoxylate/hydroxypyruvate/2-ketogluconate reductase
20	POG_GCA_000264555.1_01000	ghrB,PCHLO6_RS04975	C:COG1052	K00090	Glyoxylate reductase (NADP(+))	Alternative splicing; NADP; Oxidoreductase; Phosphoprotein; Polymorphism.	Enzyme with hydroxy-pyruvate reductase, glyoxylate reductase and D-glycerate dehydrogenase enzymatic activities. Reduces hydroxypyruvate to D-glycerate, glyoxylate to glycolate oxidizes D-glycerate to hydroxypyruvate. Belongs to the D-isomer specific 2-hydroxyacid dehydrogenase family.; KEGG: ppu:PP_1261 glyoxylate/hydroxypyruvate/2-ketogluconate reductase
20	POG_GCA_000264555.1_05154	hprA,PCHLO6_RS25500	C:COG1052	K00018	Glycerate dehydrogenase	Cytoplasm; NAD; NADP; Oxidoreductase.	Plays a central role in assimilation of carbon. It converts hydroxypyruvate to glycerate as a key step in the serine cycle, and may also play an important role in C2 reactions, by interconverting glyoxylate and glycolate. Belongs to the D-isomer specific 2-hydroxyacid dehydrogenase family.; KEGG: pfl:PFL_5121 glycerate dehydrogenase
20	POG_GCA_000264555.1_02660	serA,PHGDH,PCHLO6_RS13195	C:COG1052	K00058	Phosphoglycerate dehydrogenase	Gluconate utilization; NAD; NADP; Oxidoreductase.	Catalyzes the reduction of 2-keto-D-gluconate to gluconate. Can also catalyze the reduction of 2-keto-L-gulonate. Can use both NADH and NADPH efficiently, with a slight preference for NADPH; Belongs to the D-isomer specific 2-hydroxyacid dehydrogenase family.; KEGG: hmn:HM131_18630 D-3-phosphoglycerate dehydrogenase / 2-oxoglutarate reductase
20	POG_GCA_000264555.1_01811	sdhA,frdA,PCHLO6_RS09020	C:COG1053	K00239	Succinate dehydrogenase (quinone)	Electron transport; FAD; Flavoprotein; Membrane; Mitochondrion; Mitochondrion inner membrane; Oxidoreductase; Transit peptide; Transport; Tricarboxylic acid cycle.	Flavoprotein (FP) subunit of succinate dehydrogenase (SDH) that is involved in complex II of the mitochondrial electron transport chain and is responsible for transferring electrons from succinate to ubiquinone (coenzyme Q); Belongs to the FAD-dependent oxidoreductase 2 family. FRD/SDH subfamily.; KEGG: pmos:O165_014735 succinate dehydrogenase / fumarate reductase, flavoprotein subunit
6	POG_GCA_000963835.1_02396	aprA,PCL1606_RS11860	C:COG1053	K00394	Adenylyl-sulfate reductase		KEGG: tsn:W908_01270 adenylylsulfate reductase, subunit A
18	POG_GCA_000264555.1_05429	tesI,PCHLO6_RS26865	C:COG1053	K16051	3-oxo-5-alpha-steroid 4-dehydrogenase (acceptor)	FAD; Flavoprotein; Lipid degradation; Lipid metabolism; Oxidoreductase; Steroid metabolism.	Catalyzes the elimination of the C-1 and C-2 hydrogen atoms of the A-ring from the polycyclic ring structure of 3- ketosteroids. Is also involved in the formation of 3-keto-1,4- diene-steroid from 3-keto-4-ene-steroid; Belongs to the FAD-dependent oxidoreductase 2 family. 3-oxosteroid dehydrogenase subfamily.; KEGG: nsr:NS506_06811 3-oxo-5alpha-steroid 4-dehydrogenase
20	POG_GCA_000264555.1_01192	frmA,ADH5,adhC,PCHLO6_RS05940	C:COG1062	K00121	S-(hydroxymethyl)glutathione dehydrogenase	Cytoplasm; Metal-binding; NAD; Oxidoreductase; Zinc.	Oxidizes long-chain aliphatic alcohols, long-chain hydroxylated fatty acids and S-hydroxymethylglutathione (hmGSH) in increasing order of preference. Shows little or no activity with short-chain aliphatic alcohols. Belongs to the zinc-containing alcohol dehydrogenase family. Class-III subfamily.; KEGG: gqu:AWC35_04465 S-(hydroxymethyl)glutathione dehydrogenase / alcohol dehydrogenase
20	POG_GCA_000264555.1_01928	yahK,PCHLO6_RS09595	C:COG1064	K13979	NADP-dependent alcohol dehydrogenase C 1	Isopeptide bond; Metal-binding; NADP; Oxidoreductase; Ubl conjugation; Zinc.	Prefers aldehydes over alcohols. Belongs to the zinc-containing alcohol dehydrogenase family.; KEGG: ppu:PP_2426 uncharacterized zinc-type alcohol dehydrogenase-like protein; Oxidoreductases
19	POG_GCA_000264555.1_03695	yahK,PCHLO6_RS18280	C:COG1064	K13979	S-(hydroxymethyl)glutathione dehydrogenase	Cytoplasm; Metal-binding; NAD; Oxidoreductase; Zinc.	Belongs to the zinc-containing alcohol dehydrogenase family. Class-III subfamily.; KEGG: ctu:CTU_40980 uncharacterized zinc-type alcohol dehydrogenase-like protein; Oxidoreductases
20	POG_GCA_000264555.1_02552	BCKDHA,bkdA1,PCHLO6_RS12675	C:COG1071	K00166	3-methyl-2-oxobutanoate dehydrogenase (2-methylpropanoyl-transferring)	Oxidoreductase; Thiamine pyrophosphate.	The branched-chain alpha-keto dehydrogenase complex catalyzes the overall conversion of alpha-keto acids to acyl-CoA and CO(2). It contains multiple copies of three enzymatic components: branched-chain alpha-keto acid decarboxylase (E1), lipoamide acyltransferase (E2) and lipoamide dehydrogenase (E3) (By similarity); Belongs to the BCKDHA family.; KEGG: pfo:Pfl01_3463 2-oxoisovalerate dehydrogena…
19	POG_GCA_000264555.1_00814	PCHLO6_RS04030	C:COG1139	K18929	Lactate utilization protein B 1	4Fe-4S; Electron transport; Iron; Iron-sulfur; Metal-binding; Repeat; Transport.	Is involved in L-lactate degradation and allows cells to grow with lactate as the sole carbon source. Has probably a role as an electron transporter during oxidation of L-lactate; Belongs to the LutB/YkgF family; Contains 2 4Fe-4S ferredoxin-type domains.
20	POG_GCA_000264555.1_04003	nuoI,PCHLO6_RS19780	C:COG1143	K00338	NADH:ubiquinone reductase (H(+)-translocating)	4Fe-4S; Cell inner membrane; Cell membrane; Iron; Iron-sulfur; Membrane; Metal-binding; NAD; Oxidoreductase; Quinone; Repeat; Ubiquinone.	NDH-1 shuttles electrons from NADH, via FMN and iron- sulfur (Fe-S) centers, to quinones in the respiratory chain. The immediate electron acceptor for the enzyme in this species is believed to be ubiquinone. Couples the redox reaction to proton translocation (for every two electrons transferred, four hydrogen ions are translocated across the cytoplasmic membrane), and thus conserves the redox ene…
20	POG_GCA_000264555.1_05873	PCHLO6_RS29075	C:COG1145	K05337	Ferredoxin	4Fe-4S; Electron transport; Iron; Iron-sulfur; Metal-binding; Repeat; Transport.	Ferredoxins are iron-sulfur proteins that transfer electrons in a wide variety of metabolic reactions. Contains 2 4Fe-4S ferredoxin-type domains.
20	POG_GCA_000264555.1_01201	PCHLO6_RS05985	C:COG1146	K05524	Ferredoxin-1	3Fe-4S; 4Fe-4S; Electron transport; Iron; Iron-sulfur; Metal-binding; Repeat; Transport.	Contains 2 4Fe-4S ferredoxin-type domains.
6	POG_GCA_000963835.1_02397	aprB,PCL1606_RS11865	C:COG1146	K00395	Adenylyl-sulfate reductase		KEGG: ipo:Ilyop_2846 adenylylsulfate reductase, subunit B
20	POG_GCA_000264555.1_02562	preA,PCHLO6_RS12725	C:COG1146|F:COG0167	K17723	Dihydrouracil dehydrogenase (NAD(+))	4Fe-4S; Iron; Iron-sulfur; Metal-binding; NAD; Oxidoreductase; Repeat.	Involved in pyrimidine base degradation. Catalyzes physiologically the reduction of uracil to 5,6-dihydrouracil (DHU) by using NADH as a specific cosubstrate. It also catalyzes the reverse reaction and the reduction of thymine to 5,6- dihydrothymine (DHT) (By similarity); Belongs to the dihydropyrimidine dehydrogenase family; Contains 2 4Fe-4S ferredoxin-type domains.; KEGG: ppu:PP_4038 dihydropy…
20	POG_GCA_000264555.1_01815	DLD,lpd,pdhD,PCHLO6_RS09040	C:COG1249	K00382	Dihydrolipoyl dehydrogenase	Cytoplasm; Disulfide bond; FAD; Flavoprotein; Glycolysis; NAD; Oxidoreductase; Redox-active center.	The branched-chain alpha-keto dehydrogenase complex catalyzes the overall conversion of alpha-keto acids to acyl-CoA and CO(2). It contains multiple copies of 3 enzymatic components: branched-chain alpha-keto acid decarboxylase (E1), lipoamide acyltransferase (E2) and lipoamide dehydrogenase (E3) (By similarity); Also acts in the glycine cleavage system; Belongs to the class-I pyridine nucleotide…
18	POG_GCA_000264555.1_06262	DLD,lpd,pdhD,PCHLO6_RS30990	C:COG1249	K00382	Dihydrolipoyl dehydrogenase	Cytoplasm; Disulfide bond; FAD; Flavoprotein; Glycolysis; NAD; Oxidoreductase; Redox-active center.	LPD-3 may substitute for lipoamide dehydrogenase of the 2-oxoglutarate dehydrogenase and pyruvate multienzyme complexes when the latter is inactive or missing; Belongs to the class-I pyridine nucleotide-disulfide oxidoreductase family.; KEGG: pae:PA4829 dihydrolipoamide dehydrogenase
20	POG_GCA_000264555.1_02072	sthA,udhA,PCHLO6_RS10310	C:COG1249	K00322	NAD(P)(+) transhydrogenase (Si-specific)	Cytoplasm; FAD; Flavoprotein; NAD; NADP; Oxidoreductase.	Conversion of NADPH, generated by peripheral catabolic pathways, to NADH, which can enter the respiratory chain for energy generation; Belongs to the class-I pyridine nucleotide-disulfide oxidoreductase family.; KEGG: pae:PA2991 NAD(P) transhydrogenase
20	POG_GCA_000264555.1_02549	DLD,lpd,pdhD,PCHLO6_RS12660	C:COG1249	K00382	Dihydrolipoyl dehydrogenase	Cytoplasm; Disulfide bond; FAD; Flavoprotein; Glycolysis; NAD; Oxidoreductase; Redox-active center.	The branched-chain alpha-keto dehydrogenase complex catalyzes the overall conversion of alpha-keto acids to acyl-CoA and CO(2). It contains multiple copies of 3 enzymatic components: branched-chain alpha-keto acid decarboxylase (E1), lipoamide acyltransferase (E2) and lipoamide dehydrogenase (E3). Belongs to the class-I pyridine nucleotide-disulfide oxidoreductase family.; KEGG: pap:PSPA7_2991 di…
20	POG_GCA_000264555.1_03525	GSR,gor,PCHLO6_RS17445	C:COG1249	K00383	Glutathione-disulfide reductase	Cytoplasm; Disulfide bond; FAD; Flavoprotein; NADP; Oxidoreductase; Redox-active center.	Maintains high levels of reduced glutathione in the cytosol. Belongs to the class-I pyridine nucleotide-disulfide oxidoreductase family.; KEGG: pae:PA2025 glutathione reductase (NADPH)
18	POG_GCA_000264555.1_03304	nirB,PCHLO6_RS16355	C:COG1251	K00362	Nitrite reductase (NADH)	4Fe-4S; FAD; Flavoprotein; Heme; Iron; Iron-sulfur; Metal-binding; NAD; Nitrate assimilation; Oxidoreductase.	Belongs to the nitrite and sulfite reductase 4Fe-4S domain family.; KEGG: pch:EY04_15660 nitrite reductase (NADH) large subunit
20	POG_GCA_000264555.1_01989	nirB,PCHLO6_RS09900	C:COG1251	K00362	Nitrite reductase (NADH)	4Fe-4S; FAD; Flavoprotein; Heme; Iron; Iron-sulfur; Metal-binding; NADP; Nitrate assimilation; Oxidoreductase.	Required for nitrite assimilation; Belongs to the nitrite and sulfite reductase 4Fe-4S domain family.; KEGG: pae:PA1781 nitrite reductase (NADH) large subunit
20	POG_GCA_000264555.1_06178	norW,PCHLO6_RS30580	C:COG1251	K12265	Nitric oxide reductase FlRd-NAD(+) reductase	Cytoplasm; FAD; Flavoprotein; NAD; Oxidoreductase.	One of at least two accessory proteins for anaerobic nitric oxide (NO) reductase. Reduces the rubredoxin moiety of NO reductase; Belongs to the FAD-dependent oxidoreductase family.; KEGG: pshi:SAMEA2665130_0922 nitric oxide reductase FlRd-NAD(+) reductase; With NAD(+) or NADP(+) as acceptor
20	POG_GCA_000264555.1_06179	rubB,alkT,PCHLO6_RS30585	C:COG1251	K05297	Rubredoxin--NAD(+) reductase	Cytoplasm; Electron transport; Iron; Metal-binding; Transport.	Involved in the hydrocarbon hydroxylating system, which transfers electrons from NADH to rubredoxin reductase and then through rubredoxin to alkane 1 monooxygenase; Belongs to the rubredoxin family; Contains 1 rubredoxin-like domain.; KEGG: zal:AZF00_18220 rubredoxin---NAD+ reductase
20	POG_GCA_000264555.1_05342	ndh,PCHLO6_RS26435	C:COG1252	K03885	NADH dehydrogenase	Cell membrane; Electron transport; FAD; Flavoprotein; Membrane; NAD; Oxidoreductase; Transport; Ubiquinone.	Transfer of electrons from NADH to the respiratory chain. The immediate electron acceptor for the enzyme is believed to be ubiquinone. Does not couple the redox reaction to proton translocation. Belongs to the NADH dehydrogenase family.; KEGG: stem:CLM74_06590 NADH dehydrogenase
20	POG_GCA_000264555.1_05410	cydA,PCHLO6_RS26770	C:COG1271	K00425	Ubiquinol oxidase (electrogenic, non H(+)-transporting)	Cell inner membrane; Cell membrane; Electron transport; Formylation; Heme; Iron; Membrane; Metal-binding; Oxidoreductase; Transmembrane; Transmembrane helix; Transport.	A terminal oxidase that produces a proton motive force by the vectorial transfer of protons across the inner membrane. It is the component of the aerobic respiratory chain of E.coli that predominates when cells are grown at low aeration. Generates a proton motive force using protons and electrons from opposite sides of the membrane to generate H(2)O, transferring 1 proton/electron (By similarity)…
20	POG_GCA_000264555.1_00118	pntB,PCHLO6_RS00590	C:COG1282	K00325	NAD(P)(+) transhydrogenase (Re/Si-specific)	Cell inner membrane; Cell membrane; Membrane; NAD; NADP; Oxidoreductase; Transmembrane; Transmembrane helix.	The transhydrogenation between NADH and NADP is coupled to respiration and ATP hydrolysis and functions as a proton pump across the membrane; Belongs to the PNT beta subunit family.; KEGG: pfl:PFL_0113 NAD(P) transhydrogenase subunit beta
20	POG_GCA_000264555.1_05115	PCHLO6_RS25305	C:COG1290	K00412	Cytochrome b	Cell membrane; Electron transport; Heme; Iron; Membrane; Metal-binding; Respiratory chain; Transmembrane; Transmembrane helix; Transport.	Component of the ubiquinol-cytochrome c reductase complex (complex III or cytochrome b-c1 complex), which is a respiratory chain that generates an electrochemical potential coupled to ATP synthesis; Belongs to the cytochrome b family.
20	POG_GCA_000264555.1_05409	cydB,PCHLO6_RS26765	C:COG1294	K00426	Ubiquinol oxidase (electrogenic, non H(+)-transporting)	Cell inner membrane; Cell membrane; Electron transport; Heme; Iron; Membrane; Metal-binding; Oxidoreductase; Transmembrane; Transmembrane helix; Transport.	A terminal oxidase that catalyzes quinol-dependent, Na(+)-independent oxygen uptake. Prefers menadiol over other quinols although ubiquinol was not tested (PubMed:8626304). Generates a proton motive force using protons and electrons from opposite sides of the membrane to generate H(2)O, transferring 1 proton/electron; Belongs to the cytochrome ubiquinol oxidase subunit 2 family.; KEGG: sty:STY039…
20	POG_GCA_000264555.1_04591	PCHLO6_RS22710	C:COG1301	K11103	C4-dicarboxylate transport protein	Cell inner membrane; Cell membrane; Membrane; Sugar transport; Symport; Transmembrane; Transmembrane helix; Transport.	Responsible for the transport of dicarboxylates such as succinate, fumarate, and malate from the periplasm across the membrane; Belongs to the sodium:dicarboxylate (SDF) symporter (TC 2.A.23) family.
20	POG_GCA_000264555.1_00099	PCHLO6_RS00495	C:COG1301	K11102	Proton glutamate symport protein	Cell inner membrane; Cell membrane; Membrane; Symport; Transmembrane; Transmembrane helix; Transport.	This carrier protein is part of the Na(+)-independent, binding-protein-independent glutamate-aspartate transport system. Belongs to the sodium:dicarboxylate (SDF) symporter (TC 2.A.23) family.
20	POG_GCA_000264555.1_05393	PCHLO6_RS26690	C:COG1301	K11103	C4-dicarboxylate transport protein 1	Cell inner membrane; Cell membrane; Membrane; Sugar transport; Symport; Transmembrane; Transmembrane helix; Transport.	Responsible for the transport of dicarboxylates such as succinate, fumarate, and malate from the periplasm across the membrane; Belongs to the sodium:dicarboxylate (SDF) symporter (TC 2.A.23) family.
6	POG_GCA_000963835.1_02401	PCL1606_RS11885	C:COG1413	K22221	Uncharacterized protein YpgR
20	POG_GCA_000264555.1_01436	yiaY,PCHLO6_RS07160	C:COG1454	K13954	Alcohol dehydrogenase	Iron; NAD; Oxidoreductase.	Belongs to the iron-containing alcohol dehydrogenase family.; KEGG: vpa:VPA0566 alcohol dehydrogenase
20	POG_GCA_000264555.1_05650	adh1,PCHLO6_RS27955	C:COG1454	K19954	Long-chain primary alcohol dehydrogenase AdhA	NADP; Oxidoreductase; Zinc.	Alcohol dehydrogenase active against primary long-chain alcohols. Pentan-1-ol is the optimum substrate in vitro, but also shows efficient dehydrogenase activity on propanol, hexanol, and ethanol; Belongs to the iron-containing alcohol dehydrogenase family.; KEGG: pfl:PFL_5632 alcohol dehydrogenase; With NAD(+) or NADP(+) as acceptor
20	POG_GCA_000264555.1_00309	PCHLO6_RS01540	C:COG1526	K02379	Protein FdhD homolog	Cytoplasm.	Necessary for formate dehydrogenase activity; Belongs to the FdhD family.
20	POG_GCA_000264555.1_01885	iorB,PCHLO6_RS09390	C:COG1529	K07303	Isoquinoline 1-oxidoreductase	Cell inner membrane; Cell membrane; Membrane; Oxidoreductase; PQQ; Signal.	KEGG: pman:OU5_1814 isoquinoline 1-oxidoreductase subunit beta
19	POG_GCA_000264555.1_04138	iorB,PCHLO6_RS20455	C:COG1529	K07303	Isoquinoline 1-oxidoreductase	Aromatic hydrocarbons catabolism; Heme; Iron; Membrane; Metal-binding; Molybdenum; Oxidoreductase; Repeat; Transmembrane; Transmembrane helix.	Subunit of the two-component enzyme NicAB that mediates nicotinate hydroxylation, the first step in the aerobic nicotinate degradation pathway. Mediates conversion of nicotinate into 6- hydroxynicotinate (6HNA); Contains 3 cytochrome c domains.; KEGG: bge:BC1002_5305 isoquinoline 1-oxidoreductase subunit beta
19	POG_GCA_000264555.1_03199	adhB,PCHLO6_RS15845	C:COG1529	K22474	Alcohol dehydrogenase (quinone)	Cell membrane; Electron transport; Heme; Iron; Membrane; Metal-binding; Oxidoreductase; Pyrrolidone carboxylic acid; Repeat; Signal; Transport.	Dehydration of primary alcohols (exception: methanol). Contains 3 cytochrome c domains.; KEGG: fau:Fraau_2340 alcohol dehydrogenase (quinone), cytochrome c subunit
20	POG_GCA_000264555.1_00060	adhB,PCHLO6_RS00300	C:COG1529	K22474	Alcohol dehydrogenase (quinone)	Cell membrane; Electron transport; Heme; Iron; Membrane; Metal-binding; Oxidoreductase; Pyrrolidone carboxylic acid; Repeat; Signal; Transport.	Dehydration of primary alcohols (exception: methanol). Contains 3 cytochrome c domains.; KEGG: gox:GOX1067 alcohol dehydrogenase (quinone), cytochrome c subunit
18	POG_GCA_000264555.1_04139	nicB,PCHLO6_RS20460	C:COG1529	K18030	Nicotinate dehydrogenase (cytochrome)	Cell membrane; Electron transport; Heme; Iron; Membrane; Metal-binding; Oxidoreductase; Pyrrolidone carboxylic acid; Repeat; Signal; Transport.	Dehydration of primary alcohols (exception: methanol). Contains 3 cytochrome c domains.; KEGG: pfq:QQ39_15000 nicotinate dehydrogenase subunit B
20	POG_GCA_000264555.1_00556	queG,PCHLO6_RS02770	C:COG1600	K18979	Epoxyqueuosine reductase	4Fe-4S; Cytoplasm; Iron; Iron-sulfur; Metal-binding; Oxidoreductase; Queuosine biosynthesis; tRNA processing.	Catalyzes the conversion of epoxyqueuosine (oQ) to queuosine (Q), which is a hypermodified base found in the wobble positions of tRNA(Asp), tRNA(Asn), tRNA(His) and tRNA(Tyr); Belongs to the QueG family; Contains 1 4Fe-4S ferredoxin-type domain.; KEGG: pfl:PFL_0560 epoxyqueuosine reductase
20	POG_GCA_000264555.1_00816	,	C:COG1620	K03303	Glycolate permease GlcA	Cell inner membrane; Cell membrane; Membrane; Transmembrane; Transmembrane helix; Transport.	Transports glycolate across the membrane. Can also transport L-lactate and D-lactate. Seems to be driven by a proton motive force. Belongs to the lactate permease family.
20	POG_GCA_000264555.1_05073	cyoA,PCHLO6_RS25100	C:COG1622	K02297	Ubiquinol oxidase (H(+)-transporting)	Cell inner membrane; Cell membrane; Electron transport; Lipoprotein; Membrane; Oxidoreductase; Palmitate; Respiratory chain; Signal; Transmembrane; Transmembrane helix; Transport.	Cytochrome bo(3) ubiquinol terminal oxidase is the component of the aerobic respiratory chain of E.coli that predominates when cells are grown at high aeration. Has proton pump activity across the membrane in addition to electron transfer, pumping 2 protons/electron (By similarity); Belongs to the cytochrome c oxidase subunit 2 family.; KEGG: pfs:PFLU_5140 cytochrome o ubiquinol oxidase subunit II
20	POG_GCA_000264555.1_00065	coxB,ctaC,PCHLO6_RS00325	C:COG1622|C:COG2010	K02275	Cytochrome-c oxidase	Copper; Electron transport; Membrane; Metal-binding; Mitochondrion; Mitochondrion inner membrane; Oxidoreductase; Respiratory chain; Transmembrane; Transmembrane helix; Transport.	Cytochrome c oxidase is the component of the respiratory chain that catalyzes the reduction of oxygen to water. Subunits 1- 3 form the functional core of the enzyme complex. Subunit 2 transfers the electrons from cytochrome c via its binuclear copper A center to the bimetallic center of the catalytic subunit 1. Belongs to the cytochrome c oxidase subunit 2 family.; KEGG: pae:PA0105 cytochrome c o…
20	POG_GCA_000264555.1_04747	frc,PCHLO6_RS23475	C:COG1804	K07749	Formyl-CoA transferase	Acetylation; Alternative splicing; Disease mutation; Glutaricaciduria; Mitochondrion; Transferase; Transit peptide.	Catalyzes the succinyl-CoA-dependent conversion of glutarate to glutaryl-CoA. Can use different dicarboxylic acids as CoA acceptors, the preferred ones are glutarate, succinate, adipate, and 3-hydroxymethylglutarate; Belongs to the CaiB/BaiF CoA-transferase family.; KEGG: bur:Bcep18194_B1149 formyl-CoA transferase
19	POG_GCA_000264555.1_02685	ict-P,PCHLO6_RS13315	C:COG1804	K18289	Succinate--hydroxymethylglutarate CoA-transferase	Acetylation; Alternative splicing; Disease mutation; Glutaricaciduria; Mitochondrion; Transferase; Transit peptide.	Catalyzes the succinyl-CoA-dependent conversion of glutarate to glutaryl-CoA. Can use different dicarboxylic acids as CoA acceptors, the preferred ones are glutarate, succinate, adipate, and 3-hydroxymethylglutarate; Belongs to the CaiB/BaiF CoA-transferase family.; KEGG: pch:EY04_12160 itaconate CoA-transferase; CoA-transferases
20	POG_GCA_000264555.1_01106	frc,PCHLO6_RS05510	C:COG1804	K07749	Formyl-CoA transferase	Acetylation; Mitochondrion; Transferase; Transit peptide.	Catalyzes the succinyl-CoA-dependent conversion of glutarate to glutaryl-CoA. Can use different dicarboxylic acids as CoA acceptors, the preferred ones are glutarate, succinate, adipate, and 3-hydroxymethylglutarate (By similarity); Belongs to the CaiB/BaiF CoA-transferase family.; KEGG: pfe:PSF113_1068 formyl-CoA transferase
13	POG_GCA_000264555.1_00384	frc,PCHLO6_RS01910	C:COG1804	K07749	Formyl-CoA transferase	Transferase.	Involved in the catabolism of oxalate and in the adapatation to low pH via the induction of the oxalate-dependent acid tolerance response (ATR). Catalyzes the transfer of the CoA moiety from formyl-CoA to oxalate (By similarity); Belongs to the CaiB/BaiF CoA-transferase family.; KEGG: aav:Aave_1981 formyl-CoA transferase
20	POG_GCA_000264555.1_04590	AMACR,mcr,PCHLO6_RS22705	C:COG1804	K01796	Alpha-methylacyl-CoA racemase	Antibiotic biosynthesis; Isomerase.	Together with cefD1, catalyzes the reversible isomerization between isopenicillin N and penicillin N. This two- component IPN epimerase system may function by two sequential steps, an activation of isopenicillin N by the acyl-CoA synthase component cefD1, followed by epimerization by the acyl-CoA racemase component cefD2; Belongs to the CaiB/BaiF CoA-transferase family.; KEGG: suam:BOO69_00155 al…
20	POG_GCA_000264555.1_00123	uctC	C:COG1804	K18702	CoA:oxalate CoA-transferase	Transferase.	Involved in the fermentation of L-phenylalanine via a Stickland reaction. Catalyzes the reversible syn-dehydration of (R)-phenyllactate to (E)-cinnamate in a two steps reaction: First, FldA catalyzes the CoA-transfer from cinnamoyl-CoA to phenyllactate to yield phenyllactyl-CoA and cinnamate. Second, the dehydration of phenyllactyl-CoA to cinnamoyl-CoA is mediated by the heterodimeric FldBC compl…
20	POG_GCA_000264555.1_00068	coxC,ctaE,PCHLO6_RS00340	C:COG1845	K02276	Cytochrome-c oxidase	Cell inner membrane; Cell membrane; Membrane; Oxidoreductase; Transmembrane; Transmembrane helix.	Belongs to the cytochrome c oxidase subunit 3 family.; KEGG: pae:PA0108 cytochrome c oxidase subunit III
20	POG_GCA_000264555.1_05071	PCHLO6_RS25090	C:COG1845	K02299	Cytochrome bo(3) ubiquinol oxidase subunit 3	Cell inner membrane; Cell membrane; Electron transport; Membrane; Oxidoreductase; Transmembrane; Transmembrane helix; Transport.	Cytochrome bo(3) ubiquinol terminal oxidase is the component of the aerobic respiratory chain of E.coli that predominates when cells are grown at high aeration. Has proton pump activity across the membrane in addition to electron transfer, pumping 2 protons/electron (By similarity); Belongs to the cytochrome c oxidase subunit 3 family.
20	POG_GCA_000264555.1_00297	pckA,PCHLO6_RS01485	C:COG1866	K01610	Phosphoenolpyruvate carboxykinase (ATP)	ATP-binding; Cytoplasm; Decarboxylase; Gluconeogenesis; Lyase; Manganese; Metal-binding; Nucleotide-binding.	Involved in the gluconeogenesis. Catalyzes the conversion of oxaloacetate (OAA) to phosphoenolpyruvate (PEP) through direct phosphoryl transfer between the nucleoside triphosphate and OAA; Belongs to the phosphoenolpyruvate carboxykinase [ATP] family.; KEGG: pae:PA5192 phosphoenolpyruvate carboxykinase (ATP)
19	POG_GCA_000264555.1_02663	PCHLO6_RS13210	C:COG1894	K00124	NADH-quinone oxidoreductase subunit F	4Fe-4S; Flavoprotein; FMN; Iron; Iron-sulfur; Metal-binding; NAD; Oxidoreductase; Quinone.	NDH-1 shuttles electrons from NADH, via FMN and iron- sulfur (Fe-S) centers, to quinones in the respiratory chain. Couples the redox reaction to proton translocation (for every two electrons transferred, four hydrogen ions are translocated across the cytoplasmic membrane), and thus conserves the redox energy in a proton gradient (By similarity); Belongs to the complex I 51 kDa subunit family.
20	POG_GCA_000264555.1_04000	nuoF,PCHLO6_RS19765	C:COG1894	K00335	NADH:ubiquinone reductase (H(+)-translocating)	4Fe-4S; Flavoprotein; FMN; Iron; Iron-sulfur; Metal-binding; NAD; Oxidoreductase; Quinone; Ubiquinone.	NDH-1 shuttles electrons from NADH, via FMN and iron- sulfur (Fe-S) centers, to quinones in the respiratory chain. The immediate electron acceptor for the enzyme in this species is believed to be ubiquinone. Couples the redox reaction to proton translocation (for every two electrons transferred, four hydrogen ions are translocated across the cytoplasmic membrane), and thus conserves the redox ene…
20	POG_GCA_000264555.1_05748	PCHLO6_RS28445	C:COG1902	K21833	Probable N-methylproline demethylase	FAD; Flavoprotein; NAD; Oxidoreductase; Plasmid.	Possible NADH-dependent oxidase, functions as a demethylase that converts N-methylproline to proline.
8	POG_GCA_000963835.1_03409	fadH,PCL1606_RS16850	C:COG1902	K00219	2,4-dienoyl-CoA reductase (NADPH)	4Fe-4S; FAD; Flavoprotein; Iron; Iron-sulfur; Metal-binding; NADP; Oxidoreductase.	KEGG: psi:S70_14325 2,4-dienoyl-CoA reductase (NADPH2)
8	POG_GCA_000281915.1_02806	fadH,PCHL3084_RS13950	C:COG1902	K00219	2,4-dienoyl-CoA reductase (NADPH)	4Fe-4S; FAD; Flavoprotein; Iron; Iron-sulfur; Metal-binding; NAD; Oxidoreductase.	Reduces a range of alternative electron acceptors. In the N-terminal sectio; belongs to the NADH:flavin oxidoreductase/NADH oxidase family.; KEGG: gme:Gmet_2193 2,4-dienoyl-CoA reductase (NADPH2)
20	POG_GCA_000264555.1_01109	PCHLO6_RS05525	C:COG1902	K00354	NADPH dehydrogenase	Flavoprotein; FMN; NADP; Oxidoreductase.	Belongs to the NADH:flavin oxidoreductase/NADH oxidase family.; KEGG: bur:Bcep18194_B1736 NADPH2 dehydrogenase
20	POG_GCA_000264555.1_00947	OPR,PCHLO6_RS04715	C:COG1902	K05894	12-oxophytodienoate reductase	Cytoplasm; Flavoprotein; FMN; NADP; Oxidoreductase.	Involved in the biosynthesis of the antimalarial endoperoxide artemisinin by catalyzing the double bond reduction of (11R)-dihydroartemisinic aldehyde to produce artemisinic aldehyde. Also able to reduce artemisinic alcohol and artemisinic acid to a lesser extent; Belongs to the NADH:flavin oxidoreductase/NADH oxidase family.; KEGG: obr:102716601 12-oxophytodienoic acid reductase
19	POG_GCA_000264555.1_02801	nemA,PCHLO6_RS13895	C:COG1902	K10680	Putative 12-oxophytodienoate reductase 11	Fatty acid biosynthesis; Fatty acid metabolism; Flavoprotein; FMN; Lipid biosynthesis; Lipid metabolism; NADP; Oxidoreductase; Oxylipin biosynthesis.	Putative oxophytodienoate reductase that may be involved in the biosynthesis or metabolism of oxylipin signaling molecules; Belongs to the NADH:flavin oxidoreductase/NADH oxidase family.; KEGG: pfl:PFL_2806 N-ethylmaleimide reductase; Oxidoreductases
20	POG_GCA_000264555.1_01404	nemA,PCHLO6_RS07000	C:COG1902	K10680	Putative 12-oxophytodienoate reductase 8	Fatty acid biosynthesis; Fatty acid metabolism; Flavoprotein; FMN; Lipid biosynthesis; Lipid metabolism; NADP; Oxidoreductase; Oxylipin biosynthesis.	Putative oxophytodienoate reductase that may be involved in the biosynthesis or metabolism of oxylipin signaling molecules; Belongs to the NADH:flavin oxidoreductase/NADH oxidase family.; KEGG: pao:Pat9b_4657 N-ethylmaleimide reductase; Oxidoreductases
20	POG_GCA_000264555.1_04064	fadH,PCHLO6_RS20090	C:COG1902|S:COG0446	K00219	2,4-dienoyl-CoA reductase (NADPH)	4Fe-4S; FAD; Flavoprotein; Iron; Iron-sulfur; Metal-binding; NADP; Oxidoreductase.	KEGG: pst:PSPTO_3803 2,4-dienoyl-CoA reductase (NADPH2)
20	POG_GCA_000264555.1_03999	nuoE,PCHLO6_RS19760	C:COG1905	K00334	NADH:ubiquinone reductase (H(+)-translocating)	2Fe-2S; Iron; Iron-sulfur; Metal-binding; NAD; Oxidoreductase; Quinone; Ubiquinone.	NDH-1 shuttles electrons from NADH, via FMN and iron- sulfur (Fe-S) centers, to quinones in the respiratory chain. The immediate electron acceptor for the enzyme in this species is believed to be ubiquinone. Couples the redox reaction to proton translocation (for every two electrons transferred, four hydrogen ions are translocated across the cytoplasmic membrane), and thus conserves the redox ene…
19	POG_GCA_000264555.1_02662	PCHLO6_RS13205	C:COG1905	K00127	NADH-quinone oxidoreductase subunit E	2Fe-2S; Iron; Iron-sulfur; Metal-binding; NAD; Oxidoreductase; Quinone.	NDH-1 shuttles electrons from NADH, via FMN and iron- sulfur (Fe-S) centers, to quinones in the respiratory chain. The immediate electron acceptor for the enzyme in this species is believed to be menaquinone. Couples the redox reaction to proton translocation (for every two electrons transferred, four hydrogen ions are translocated across the cytoplasmic membrane), and thus conserves the redox en…
20	POG_GCA_000264555.1_04846	fumA,fumB,PCHLO6_RS23970	C:COG1951|C:COG1838	K01676	Fumarate hydratase	4Fe-4S; Iron; Iron-sulfur; Lyase; Metal-binding.	Belongs to the class-I fumarase family.; KEGG: pshi:SAMEA2665130_1884 fumarate hydratase, class I
20	POG_GCA_000264555.1_01809	PCHLO6_RS09010	C:COG2009	K00241	Succinate dehydrogenase cytochrome b556 subunit	Cell inner membrane; Cell membrane; Electron transport; Heme; Iron; Membrane; Metal-binding; Transmembrane; Transmembrane helix; Transport; Tricarboxylic acid cycle.	Membrane-anchoring subunit of succinate dehydrogenase (SDH); Belongs to the cytochrome b560 family.
20	POG_GCA_000264555.1_02033	PCHLO6_RS10115	C:COG2010	K00406	Cbb3-type cytochrome c oxidase subunit CcoP1	Cell inner membrane; Cell membrane; Electron transport; Heme; Hydrogen ion transport; Ion transport; Iron; Membrane; Metal-binding; Oxidoreductase; Repeat; Respiratory chain; Transmembrane; Transmembrane helix; Transport.	C-type cytochrome. Part of the cbb3-type cytochrome c oxidase complex. CcoP subunit is required for transferring electrons from donor cytochrome c via its heme groups to CcoO subunit. From there, electrons are shuttled to the catalytic binuclear center of CcoN subunit where oxygen reduction takes place. The complex also functions as a proton pump (By similarity); Belongs to the CcoP / FixP family…
20	POG_GCA_000264555.1_02037	PCHLO6_RS10135	C:COG2010	K00406	Cbb3-type cytochrome c oxidase subunit CcoP1	Cell inner membrane; Cell membrane; Electron transport; Heme; Hydrogen ion transport; Ion transport; Iron; Membrane; Metal-binding; Oxidoreductase; Repeat; Respiratory chain; Transmembrane; Transmembrane helix; Transport.	C-type cytochrome. Part of the cbb3-type cytochrome c oxidase complex. CcoP subunit is required for transferring electrons from donor cytochrome c via its heme groups to CcoO subunit. From there, electrons are shuttled to the catalytic binuclear center of CcoN subunit where oxygen reduction takes place. The complex also functions as a proton pump (By similarity); Belongs to the CcoP / FixP family…
20	POG_GCA_000264555.1_05746	PCHLO6_RS28435	C:COG2025	K03522	Probable electron transfer flavoprotein subunit alpha, mitochondrial	Electron transport; FAD; Flavoprotein; Mitochondrion; Transit peptide; Transport.	The electron transfer flavoprotein serves as a specific electron acceptor for several dehydrogenases, including five acyl- CoA dehydrogenases, glutaryl-CoA and sarcosine dehydrogenase. It transfers the electrons to the main mitochondrial respiratory chain via ETF-ubiquinone oxidoreductase (ETF dehydrogenase) (By similarity); Belongs to the ETF alpha-subunit/FixB family.
20	POG_GCA_000264555.1_01932	PCHLO6_RS09615	C:COG2025	K03522	Electron transfer flavoprotein subunit alpha	Electron transport; FAD; Flavoprotein; Transport.	The electron transfer flavoprotein serves as a specific electron acceptor for other dehydrogenases. It transfers the electrons to the main respiratory chain via ETF-ubiquinone oxidoreductase (ETF dehydrogenase) (By similarity); Belongs to the ETF alpha-subunit/FixB family.
20	POG_GCA_000264555.1_03002	dpkA,lhpD,PCHLO6_RS14875	C:COG2055	K13609	1-piperideine-2-carboxylate/1-pyrroline-2-carboxylate reductase (NADPH)	NADP; Oxidoreductase.	Catalyzes the reduction of both Delta(1)-pyrroline-2- carboxylate (Pyr2C) and Delta(1)-piperideine-2-carboxylate (Pip2C) to L-proline and L-pipecolate, respectively, using NADPH as the electron donor. Can use NADH instead of NADPH, although with much less efficiency. Plays an essential role in the catabolism of D- proline and D-lysine, which allows P.putida to grow on each of these amino-acids as…
19	POG_GCA_000264555.1_01454	dpkA,lhpD,PCHLO6_RS07250	C:COG2055	K13609	1-piperideine-2-carboxylate/1-pyrroline-2-carboxylate reductase (NADPH)	NADP; Oxidoreductase.	Catalyzes the reduction of both Delta(1)-pyrroline-2- carboxylate (Pyr2C) and Delta(1)-piperideine-2-carboxylate (Pip2C) to L-proline and L-pipecolate, respectively, using NADPH as the electron donor. Cannot use NADH instead of NADPH. Is likely involved in a degradation pathway that converts trans-3-hydroxy-L- proline (t3LHyp) to L-proline, which would allow P.aeruginosa to grow on t3LHyp as a so…
20	POG_GCA_000264555.1_01884	iorA,PCHLO6_RS09385	C:COG2080	K07302	Isoquinoline 1-oxidoreductase	2Fe-2S; Iron; Iron-sulfur; Metal-binding; Oxidoreductase.	Component of a complex that catalyzes the reductive dehydroxylation of 4-hydroxybenzoyl-CoA to benzoyl-CoA. Reaction is not reversible. Is a key enzyme in the anaerobic degradation of phenolic compounds; Contains 1 2Fe-2S ferredoxin-type domain.; KEGG: lrz:BJI69_06815 isoquinoline 1-oxidoreductase subunit alpha
20	POG_GCA_000264555.1_05745	PCHLO6_RS28430	C:COG2086	K03521	electron transfer flavoprotein beta subunit
20	POG_GCA_000264555.1_01931	PCHLO6_RS09610	C:COG2086	K03521	Electron transfer flavoprotein subunit beta, mitochondrial	Alternative splicing; Electron transport; FAD; Flavoprotein; Mitochondrion; Transit peptide; Transport.	The electron transfer flavoprotein serves as a specific electron acceptor for several dehydrogenases, including five acyl- CoA dehydrogenases, glutaryl-CoA and sarcosine dehydrogenase. It transfers the electrons to the main mitochondrial respiratory chain via ETF-ubiquinone oxidoreductase (ETF dehydrogenase) (By similarity). Involved in leucine catabolism and in phytol degradation; Belongs to the…
19	POG_GCA_000264555.1_04295	ssuD,PCHLO6_RS21230	C:COG2141	K04091	Alkanesulfonate monooxygenase	Flavoprotein; FMN; Monooxygenase; Oxidoreductase.	Catalyzes the desulfonation of aliphatic sulfonates. Shows highest activity with methanesulfonate; Belongs to the SsuD family.; KEGG: eco:b0935 alkanesulfonate monooxygenase
20	POG_GCA_000264555.1_05930	ssuD,PCHLO6_RS29355	C:COG2141	K04091	Alkanesulfonate monooxygenase	Flavoprotein; FMN; Monooxygenase; Oxidoreductase.	Catalyzes the desulfonation of aliphatic sulfonates; Belongs to the SsuD family.; KEGG: eco:b0935 alkanesulfonate monooxygenase
18	POG_GCA_000264555.1_03257	ssuD,PCHLO6_RS16120	C:COG2141	K04091	Alkanesulfonate monooxygenase	Flavoprotein; FMN; Monooxygenase; Oxidoreductase.	Catalyzes the desulfonation of aliphatic sulfonates; Belongs to the SsuD family.; KEGG: pst:PSPTO_1795 alkanesulfonate monooxygenase
20	POG_GCA_000264555.1_00046	PCHLO6_RS00230	C:COG2141	K07496	Uncharacterized protein YhbW		To bacterial alkanal monooxygenase alpha and beta chains.
20	POG_GCA_000264555.1_01810	PCHLO6_RS09015	C:COG2142	K00242	Succinate dehydrogenase hydrophobic membrane anchor subunit	Cell inner membrane; Cell membrane; Electron transport; Heme; Iron; Membrane; Metal-binding; Transmembrane; Transmembrane helix; Transport; Tricarboxylic acid cycle.	Membrane-anchoring subunit of succinate dehydrogenase (SDH).
18	POG_GCA_000264555.1_03303	nirD,PCHLO6_RS16350	C:COG2146	K00363	Nitrite reductase (NADH)	4Fe-4S; FAD; Flavoprotein; Heme; Iron; Iron-sulfur; Metal-binding; NADP; Nitrate assimilation; Oxidoreductase.	Belongs to the nitrite and sulfite reductase 4Fe-4S domain family.; KEGG: pch:EY04_15655 nitrite reductase (NADH) small subunit
20	POG_GCA_000264555.1_05300	PCHLO6_RS26225	C:COG2146		hypothetical protein
20	POG_GCA_000264555.1_03995	aceA,PCHLO6_RS19740	C:COG2224	K01637	Isocitrate lyase	Glyoxylate bypass; Lyase; Magnesium; Metal-binding; Tricarboxylic acid cycle.	Involved in the persistence and virulence of Mycobacterium. Catalyzes the reversible formation of succinate and glyoxylate from isocitrate, a key step of the glyoxylate cycle, which operates as an anaplerotic route for replenishing the tricarboxylic acid cycle during growth on fatty acid substrates; Belongs to the isocitrate lyase/PEP mutase superfamily. Isocitrate lyase family.; KEGG: pshi:SAMEA…
20	POG_GCA_000264555.1_05714	aceB,glcB,PCHLO6_RS28275	C:COG2225	K01638	Malate synthase	Cytoplasm; Glyoxylate bypass; Magnesium; Metal-binding; Oxidation; Transferase; Tricarboxylic acid cycle.	Involved in the glycolate utilization. Catalyzes the condensation and subsequent hydrolysis of acetyl-coenzyme A (acetyl-CoA) and glyoxylate to form malate and CoA; Belongs to the malate synthase family. GlcB subfamily.; KEGG: pfl:PFL_5700 malate synthase
20	POG_GCA_000264555.1_01139	ppc,PCHLO6_RS05675	C:COG2352	K01595	Phosphoenolpyruvate carboxylase	Carbon dioxide fixation; Lyase; Magnesium.	Forms oxaloacetate, a four-carbon dicarboxylic acid source for the tricarboxylic acid cycle; Belongs to the PEPCase type 1 family.; KEGG: pae:PA3687 phosphoenolpyruvate carboxylase
20	POG_GCA_000264555.1_00505	aceE,PCHLO6_RS02515	C:COG2609	K00163	Pyruvate dehydrogenase (acetyl-transferring)	Glycolysis; Oxidoreductase; Pyruvate; Thiamine pyrophosphate.	Component of the pyruvate dehydrogenase (PDH) complex, that catalyzes the overall conversion of pyruvate to acetyl-CoA and CO(2).; KEGG: ssz:SCc_574 pyruvate dehydrogenase E1 component
20	POG_GCA_000264555.1_03987	IDH1,IDH2,icd,PCHLO6_RS19700	C:COG2838	K00031	Isocitrate dehydrogenase (NADP(+))	Glyoxylate bypass; Magnesium; Metal-binding; NADP; Oxidoreductase; Tricarboxylic acid cycle.	Belongs to the monomeric-type IDH family.; KEGG: ppu:PP_4012 isocitrate dehydrogenase
20	POG_GCA_000264555.1_00109	PCHLO6_RS00545	C:COG2851	K03300	Uncharacterized transporter YraO	Cell membrane; Citrate utilization; Membrane; Symport; Transmembrane; Transmembrane helix; Transport.	Transports the free citrate anion; Belongs to the CitM (TC 2.A.11) transporter family.
20	POG_GCA_000264555.1_05114	PCHLO6_RS25300	C:COG2857	K00413	Cytochrome c1	Cell membrane; Electron transport; Heme; Iron; Membrane; Metal-binding; Respiratory chain; Signal; Transmembrane; Transmembrane helix; Transport.
15	POG_GCA_000264555.1_03230	PCHLO6_RS15980	C:COG2863	K17230	Thiosulfate dehydrogenase electron acceptor	Heme; Iron; Metal-binding; Repeat; Signal.	Acts as an electron acceptor for the thiosulfate dehydrogenase TsdA; Contains 2 cytochrome c domains.
19	POG_GCA_000264555.1_03531	tsdA,PCHLO6_RS17475	C:COG2863	K19713	Thiosulfate dehydrogenase	Electron transport; Heme; Iron; Metal-binding; Periplasm; Signal; Transport.	KEGG: tvi:Thivi_3993 thiosulfate dehydrogenase
20	POG_GCA_000264555.1_00088	tsdA,PCHLO6_RS00440	C:COG2863	K19713	Thiosulfate dehydrogenase	Electron transport; Heme; Iron; Metal-binding; Periplasm; Signal; Transport.	KEGG: tvi:Thivi_3993 thiosulfate dehydrogenase
20	POG_GCA_000264555.1_04893	PCHLO6_RS24205	C:COG2878	K03616	Electron transport complex subunit B	2Fe-2S; 4Fe-4S; Cell inner membrane; Cell membrane; Electron transport; Iron; Iron-sulfur; Membrane; Metal-binding; Repeat; Transport.	Part of a membrane complex involved in electron transport; Belongs to the 4Fe4S bacterial-type ferredoxin family. RnfB subfamily; Contains 1 4Fe-4S domain; Contains 2 4Fe-4S ferredoxin-type domains.
19	POG_GCA_000264555.1_02035	PCHLO6_RS10125	C:COG2993	K00405	cytochrome c oxidase cbb3-type subunit II
20	POG_GCA_000264555.1_02039	PCHLO6_RS10145	C:COG2993	K00405	cytochrome c oxidase cbb3-type subunit II
7	POG_GCA_000281915.1_02198	PCHL3084_RS10940	C:COG3038	K12262	cytochrome b561
20	POG_GCA_000264555.1_05807	PCHLO6_RS28740	C:COG3038	K12262	Cytochrome b561 homolog 2	Cell inner membrane; Cell membrane; Electron transport; Heme; Iron; Membrane; Metal-binding; Transmembrane; Transmembrane helix; Transport.	Belongs to the cytochrome b561 family.
20	POG_GCA_000264555.1_04062	PCHLO6_RS20080	C:COG3038	K12262	Cytochrome b561 homolog 1	Cell inner membrane; Cell membrane; Electron transport; Heme; Iron; Membrane; Metal-binding; Transmembrane; Transmembrane helix; Transport.	Belongs to the cytochrome b561 family.
20	POG_GCA_000264555.1_05070	PCHLO6_RS25085	C:COG3125	K02300	Cytochrome bo(3) ubiquinol oxidase subunit 4	Cell inner membrane; Cell membrane; Electron transport; Membrane; Oxidoreductase; Transmembrane; Transmembrane helix; Transport.	Cytochrome bo(3) ubiquinol terminal oxidase is the component of the aerobic respiratory chain of E.coli that predominates when cells are grown at high aeration. Has proton pump activity across the membrane in addition to electron transfer, pumping 2 protons/electron (By similarity); Belongs to the cytochrome c oxidase bacterial subunit 4 family.
20	POG_GCA_000264555.1_00589	PCHLO6_RS02930	C:COG3241		Azurin	Copper; Disulfide bond; Electron transport; Metal-binding; Periplasm; Signal; Transport.	Transfers electrons from cytochrome c551 to cytochrome oxidase; Contains 1 plastocyanin-like domain.
20	POG_GCA_000264555.1_06113	PCHLO6_RS30250	C:COG3245		Cytochrome c5	Disulfide bond; Electron transport; Heme; Iron; Metal-binding; Transport.	It is unreactive with cytochrome c reductase or oxidase. Belongs to the cytochrome c family.
19	POG_GCA_000264555.1_03922	soxD,PCHLO6_RS19385	C:COG3245	K22622	S-disulfanyl-L-cysteine oxidoreductase	Electron transport; Heme; Iron; Metal-binding; Photosynthesis; Signal; Transport.	KEGG: alp:LPB137_11535 S-disulfanyl-L-cysteine oxidoreductase SoxD
19	POG_GCA_000264555.1_03530	tsdA,PCHLO6_RS17470	C:COG3258	K19713	Thiosulfate dehydrogenase	Heme; Iron; Metal-binding; Oxidoreductase; Periplasm; Repeat; Signal.	Catalyzes the oxidation of 2 molecules of thiosulfate to tetrathionate, using TsdB as an electron acceptor; Contains 2 cytochrome c domains.; KEGG: pch:EY04_16905 thiosulfate dehydrogenase
20	POG_GCA_000264555.1_02036	ccoN,PCHLO6_RS10130	C:COG3278	K00404	Cytochrome-c oxidase	Cell inner membrane; Cell membrane; Copper; Electron transport; Heme; Iron; Membrane; Metal-binding; Oxidoreductase; Respiratory chain; Transmembrane; Transmembrane helix; Transport.	Cbb3-type cytochrome c oxidase is the component of the respiratory chain that catalyzes the reduction of oxygen to water. Subunits CcoN and CcoO form the functional core of the enzyme complex. Subunits CcoP and CcoQ may optionally bind to the core. CcoN is the catalytic subunit of the enzyme. Electrons originating in cytochrome c or a quinol are transferred to the bimetallic center formed by a hi…
20	POG_GCA_000264555.1_02040	ccoN,PCHLO6_RS10150	C:COG3278	K00404	Cytochrome-c oxidase	Cell inner membrane; Cell membrane; Copper; Electron transport; Heme; Iron; Membrane; Metal-binding; Oxidoreductase; Respiratory chain; Transmembrane; Transmembrane helix; Transport.	Cbb3-type cytochrome c oxidase is the component of the respiratory chain that catalyzes the reduction of oxygen to water. Subunits CcoN and CcoO form the functional core of the enzyme complex. Subunits CcoP and CcoQ may optionally bind to the core. CcoN is the catalytic subunit of the enzyme. Electrons originating in cytochrome c or a quinol are transferred to the bimetallic center formed by a hi…
19	POG_GCA_000264555.1_02954	ccoN,PCHLO6_RS14645	C:COG3278	K00404	Cytochrome-c oxidase	Cell inner membrane; Cell membrane; Copper; Electron transport; Heme; Iron; Membrane; Metal-binding; Oxidoreductase; Respiratory chain; Transmembrane; Transmembrane helix; Transport.	Cbb3-type cytochrome c oxidase is the component of the respiratory chain that catalyzes the reduction of oxygen to water. Subunits CcoN and CcoO form the functional core of the enzyme complex. Subunits CcoP and CcoQ may optionally bind to the core. CcoN is the catalytic subunit of the enzyme. Electrons originating in cytochrome c or a quinol are transferred to the bimetallic center formed by a hi…
20	POG_GCA_000264555.1_00120	pntA,PCHLO6_RS00600	C:COG3288	K00324	NAD(P)(+) transhydrogenase (Re/Si-specific)	Cell inner membrane; Cell membrane; Membrane; NAD; NADP; Nucleotide-binding; Oxidoreductase; Transmembrane; Transmembrane helix.	The transhydrogenation between NADH and NADP is coupled to respiration and ATP hydrolysis and functions as a proton pump across the membrane. Belongs to the AlaDH/PNT family.; KEGG: pae:PA0195 NAD(P) transhydrogenase subunit alpha
20	POG_GCA_000264555.1_00119	pntA,PCHLO6_RS00595	C:COG3288	K00324	NAD(P)(+) transhydrogenase (Re/Si-specific)	Cell inner membrane; Cell membrane; Membrane; NAD; NADP; Oxidoreductase; Transmembrane; Transmembrane helix.	The transhydrogenation between NADH and NADP is coupled to respiration and ATP hydrolysis and functions as a proton pump across the membrane.; KEGG: psb:Psyr_5017 NAD(P) transhydrogenase subunit alpha
19	POG_GCA_000264555.1_02664	fdoG,fdhF,fdwA,PCHLO6_RS13215	C:COG3383	K00123	Formate dehydrogenase	2Fe-2S; 4Fe-4S; Electron transport; Iron; Iron-sulfur; Membrane; Metal-binding; Mitochondrion; Mitochondrion inner membrane; NAD; Oxidoreductase; Respiratory chain; Transit peptide; Transport; Ubiquinone.	Core subunit of the mitochondrial membrane respiratory chain NADH dehydrogenase (Complex I) that is believed to belong to the minimal assembly required for catalysis. Complex I functions in the transfer of electrons from NADH to the respiratory chain. The immediate electron acceptor for the enzyme is believed to be ubiquinone. This is the largest subunit of complex I and it is a component of the …
20	POG_GCA_000264555.1_00330	PCHLO6_RS01645	C:COG3474	K08738	Cytochrome c 2	Apoptosis; Electron transport; Heme; Iron; Metal-binding; Mitochondrion; Phosphoprotein; Respiratory chain; Transport.	Electron carrier protein. The oxidized form of the cytochrome c heme group can accept an electron from the heme group of the cytochrome c1 subunit of cytochrome reductase. Cytochrome c then transfers this electron to the cytochrome oxidase complex, the final protein carrier in the mitochondrial electron-transport chain (By similarity); Plays a role in apoptosis. Suppression of the anti- apoptotic…
20	POG_GCA_000264555.1_04874	PCHLO6_RS24105	C:COG3488		hypothetical protein
20	POG_GCA_000264555.1_05794	PCHLO6_RS28675	C:COG3909		hypothetical protein
19	POG_GCA_000264555.1_03919	PCHLO6_RS19370	C:COG4313		hypothetical protein
19	POG_GCA_000264555.1_04892	PCHLO6_RS24200	C:COG4657	K03617	Electron transport complex subunit A	Cell inner membrane; Cell membrane; Electron transport; Membrane; Transmembrane; Transmembrane helix; Transport.	Part of a membrane complex involved in electron transport; Belongs to the NqrDE/RnfAE family.
19	POG_GCA_000264555.1_04894	PCHLO6_RS24210	C:COG4658	K03614	Electron transport complex subunit D	Cell inner membrane; Cell membrane; Electron transport; Membrane; Transmembrane; Transmembrane helix; Transport.	Part of a membrane complex involved in electron transport; Belongs to the NqrB/RnfD family.
19	POG_GCA_000264555.1_04895	PCHLO6_RS24215	C:COG4659	K03612	Electron transport complex subunit G	Cell inner membrane; Cell membrane; Electron transport; Membrane; Transmembrane; Transmembrane helix; Transport.	Part of a membrane complex involved in electron transport; Belongs to the RnfG family.
19	POG_GCA_000264555.1_04896	PCHLO6_RS24220	C:COG4660	K03613	Electron transport complex subunit E	Cell inner membrane; Cell membrane; Electron transport; Membrane; Transmembrane; Transmembrane helix; Transport.	Part of a membrane complex involved in electron transport; Belongs to the NqrDE/RnfAE family.
20	POG_GCA_000264555.1_01453	aldH,PCHLO6_RS07245	C:ENOG410XPCV	K13877	2,5-dioxovalerate dehydrogenase	NADP; Oxidoreductase.	Catalyzes the NAD(P)(+)-dependent oxidation of alpha- ketoglutaric semialdehyde (alphaKGSA) to alpha-ketoglutarate in the D-glutarate degradation pathway; Belongs to the aldehyde dehydrogenase family.; KEGG: sod:Sant_2373 2,5-dioxopentanoate dehydrogenase
19	POG_GCA_000264555.1_05533	PCHLO6_RS27375	C:ENOG410XPQW	K13955	Uncharacterized zinc-type alcohol dehydrogenase-like protein YjmD	Metal-binding; Oxidoreductase; Zinc.	Belongs to the zinc-containing alcohol dehydrogenase family.
17	POG_GCA_000264555.1_04259	qhpA,PCHLO6_RS21050	C:ENOG410XS2A	K08685	Methylamine dehydrogenase (amicyanin)		KEGG: pch:EY04_20885 quinohemoprotein amine dehydrogenase
8	POG_GCA_000281915.1_02718	aldA,PCHL3084_RS13510	C:ENOG410XT7Y	K07248	Lactaldehyde dehydrogenase	Arginine metabolism; NAD; Oxidoreductase.	Catalyzes the NAD-dependent reduction of succinylglutamate semialdehyde into succinylglutamate; Belongs to the aldehyde dehydrogenase family. AstD subfamily.; KEGG: shal:SHALO_1206 lactaldehyde dehydrogenase / glycolaldehyde dehydrogenase
20	POG_GCA_000264555.1_02038	PCHLO6_RS10140	C:ENOG410XUKB	K00407	cytochrome c oxidase cbb3-type subunit IV
20	POG_GCA_000264555.1_02034	PCHLO6_RS10120	C:ENOG410XUKB	K00407	cytochrome c oxidase cbb3-type subunit IV
20	POG_GCA_000264555.1_03326	puuB,ordL,PCHLO6_RS16465	C:ENOG410XWBT	K09471	Gamma-glutamylputrescine oxidoreductase	NAD; Oxidoreductase.	Involved in the breakdown of putrescine via the oxidation of L-glutamylputrescine; Belongs to the gamma-glutamylputrescine oxidoreductase family.; KEGG: pcq:PcP3B5_43470 gamma-glutamylputrescine oxidase; With oxygen as acceptor
20	POG_GCA_000264555.1_06120	puuB,ordL,PCHLO6_RS30285	C:ENOG410XWBT	K09471	Probable oxidoreductase OrdL	NAD; Oxidoreductase.	KEGG: pfe:PSF113_1923 gamma-glutamylputrescine oxidase; With oxygen as acceptor
18	POG_GCA_000264555.1_02807	puuB,ordL,PCHLO6_RS13925	C:ENOG410XWBT	K09471	Gamma-glutamylputrescine oxidoreductase	NAD; Oxidoreductase.	Involved in the breakdown of putrescine via the oxidation of L-glutamylputrescine; Belongs to the gamma-glutamylputrescine oxidoreductase family.; KEGG: pch:EY04_12730 gamma-glutamylputrescine oxidase; With oxygen as acceptor
20	POG_GCA_000264555.1_02228	puuB,ordL,PCHLO6_RS11090	C:ENOG410XWBT	K09471	Gamma-glutamylputrescine oxidoreductase	NAD; Oxidoreductase.	Involved in the breakdown of putrescine via the oxidation of L-glutamylputrescine; Belongs to the gamma-glutamylputrescine oxidoreductase family.; KEGG: ppu:PP_2448 gamma-glutamylputrescine oxidase; With oxygen as acceptor
19	POG_GCA_000264555.1_02428	puuB,ordL,PCHLO6_RS12065	C:ENOG410XWBT	K09471	Gamma-glutamylputrescine oxidoreductase	NAD; Oxidoreductase.	Involved in the breakdown of putrescine via the oxidation of L-glutamylputrescine; Belongs to the gamma-glutamylputrescine oxidoreductase family.; KEGG: pfl:PFL_2343 gamma-glutamylputrescine oxidase; With oxygen as acceptor
18	POG_GCA_000264555.1_04256	PCHLO6_RS21035	C:ENOG410Y8TR		hypothetical protein
18	POG_GCA_000264555.1_05198	PCHLO6_RS25720	C:ENOG410YU5K	K12262	cytochrome b561
20	POG_GCA_000264555.1_03365	GCDH,gcdH,PCHLO6_RS16660	C:ENOG410ZM68	K00252	Glutaryl-CoA dehydrogenase (ETF)		KEGG: span:AWL63_12595 glutaryl-CoA dehydrogenase
20	POG_GCA_000264555.1_01942	PCHLO6_RS09665	C:ENOG4111GNR		hypothetical protein
20	POG_GCA_000264555.1_02540	PCHLO6_RS12620	C:ENOG4111PFR	K00493	Unspecific monooxygenase	Heme; Iron; Metal-binding; Monooxygenase; Oxidoreductase.	Belongs to the cytochrome P450 family.; KEGG: bur:Bcep18194_B0775 unspecific monooxygenase
17	POG_GCA_000264555.1_04257	PCHLO6_RS21040	C:ENOG4111PMI		Quinohemoprotein amine dehydrogenase subunit gamma	CTQ; Electron transport; Oxidoreductase; Periplasm; Thioether bond; Transport.
19	POG_GCA_000264555.1_04045	PCHLO6_RS19995	C:ENOG4111RUE	K12262	Cytochrome b561 homolog 2	Cell inner membrane; Cell membrane; Electron transport; Heme; Iron; Membrane; Metal-binding; Transmembrane; Transmembrane helix; Transport.	Belongs to the cytochrome b561 family.
19	POG_GCA_000264555.1_02665	fdsD,PCHLO6_RS13220	C:ENOG41123J3	K00126	Formate dehydrogenase		KEGG: pfe:PSF113_3170 formate dehydrogenase subunit delta
19	POG_GCA_000264555.1_02374	PCHLO6_RS11790	CH:COG0654	K03380	Phenol 2-monooxygenase (NADPH)	Aromatic hydrocarbons catabolism; FAD; Flavoprotein; NAD; Oxidoreductase.	Catalyzes the insertion of one atom of molecular oxygen into position 2 of the phenyl ring of 3-(3- hydroxyphenyl)propionate (3-HPP) and hydroxycinnamic acid (3HCI); Belongs to the PheA/TfdB FAD monooxygenase family.; KEGG: pno:SNOG_10050 phenol 2-monooxygenase
20	POG_GCA_000264555.1_05951	ubiI,PCHLO6_RS29460	CH:COG0654	K18800	2-polyprenylphenol 6-hydroxylase	FAD; Flavoprotein; Monooxygenase; Oxidoreductase; Ubiquinone biosynthesis.	FAD-dependent monooxygenase required for the aerobic hydroxylation of 2-octaprenylphenol to 2-octaprenyl-6-hydroxy- phenol, the first hydroxylation step in coenzyme Q (ubiquinone) biosynthesis; Belongs to the UbiH/COQ6 family.; KEGG: pmy:Pmen_0327 2-polyprenylphenol 6-hydroxylase
20	POG_GCA_000264555.1_04863	pobA,PCHLO6_RS24050	CH:COG0654	K00481	4-hydroxybenzoate 3-monooxygenase	Aromatic hydrocarbons catabolism; FAD; Flavoprotein; Monooxygenase; NADP; Oxidoreductase.	KEGG: vfl:AL536_10250 p-hydroxybenzoate 3-monooxygenase
20	POG_GCA_000264555.1_05952	ubiH,PCHLO6_RS29465	CH:COG0654	K03185	2-octaprenyl-6-methoxyphenol hydroxylase	FAD; Flavoprotein; Monooxygenase; Oxidoreductase; Ubiquinone biosynthesis.	Is likely an oxygenase that introduces the hydroxyl group at carbon four of 2-octaprenyl-6-methoxyphenol resulting in the formation of 2-octaprenyl-6-methoxy-1,4-benzoquinol; Belongs to the UbiH/COQ6 family.; KEGG: pae:PA5223 2-octaprenyl-6-methoxyphenol hydroxylase; With NADH or NADPH as one donor, and incorporation of one atom of oxygen
20	POG_GCA_000264555.1_02637	PCHLO6_RS13085	CP:COG0651	K05561	Probable K(+)/H(+) antiporter subunit D	Antiport; Cell membrane; Hydrogen ion transport; Ion transport; Membrane; Potassium; Potassium transport; Transmembrane; Transmembrane helix; Transport.	Part of a K(+) efflux system which is required for the adaptation of R.meliloti to alkaline pH as well as for the infection process during symbiotic nodule development. Belongs to the CPA3 antiporters (TC 2.A.63) subunit D family.
20	POG_GCA_000264555.1_01185	tilS,mesJ,PCHLO6_RS05905	D:COG0037	K04075	tRNA(Ile)-lysidine synthetase	ATP-binding; Cytoplasm; Ligase; Nucleotide-binding; tRNA processing.	Ligates lysine onto the cytidine present at position 34 of the AUA codon-specific tRNA(Ile) that contains the anticodon CAU, in an ATP-dependent manner. Cytidine is converted to lysidine, thus changing the amino acid specificity of the tRNA from methionine to isoleucine; Belongs to the tRNA(Ile)-lysidine synthase family.; KEGG: pch:EY04_05300 tRNA(Ile)-lysidine synthase
20	POG_GCA_000264555.1_04587	PCHLO6_RS22690	D:COG0037	K14058	tRNA 2-thiocytidine biosynthesis protein TtcA	ATP-binding; Cytoplasm; Nucleotide-binding; tRNA processing.	Required for the thiolation of cytidine in position 32 of tRNA, to form 2-thiocytidine (s(2)C32); Belongs to the TtcA family.
20	POG_GCA_000264555.1_05091	PCHLO6_RS25190	D:COG0206	K03531	Cell division protein FtsZ	Cell cycle; Cell division; Cytoplasm; GTP-binding; Nucleotide-binding; Septation.	Essential cell division protein that forms a contractile ring structure (Z ring) at the future cell division site. The regulation of the ring assembly controls the timing and the location of cell division. One of the functions of the FtsZ ring is to recruit other cell division proteins to the septum to produce a new cell wall between the dividing cells. Binds GTP and shows GTPase activity; Belong…
20	POG_GCA_000264555.1_03975	PCHLO6_RS19640	D:COG0239	K06199	Putative fluoride ion transporter CrcB	Cell inner membrane; Cell membrane; Membrane; Transmembrane; Transmembrane helix; Transport.	Important for reducing fluoride concentration in the cell, thus reducing its toxicity; Belongs to the CrcB (TC 9.B.71) family.
20	POG_GCA_000264555.1_00907	PCHLO6_RS04510	D:COG0424	K06287	Maf-like protein plu4068	Cytoplasm.	Belongs to the maf family.
20	POG_GCA_000264555.1_01893	PCHLO6_RS09430	D:COG0424	K06287	Septum formation protein Maf	Cytoplasm.	Involved in septum formation; Belongs to the maf family.
20	POG_GCA_000264555.1_06307	PCHLO6_RS31220	D:COG0445	K03495	tRNA uridine 5-carboxymethylaminomethyl modification enzyme MnmG	Cytoplasm; FAD; Flavoprotein; NAD; tRNA processing.	NAD-binding protein involved in the addition of a carboxymethylaminomethyl (cmnm) group at the wobble position (U34) of certain tRNAs, forming tRNA-cmnm(5)s(2)U34; Belongs to the MnmG family.
20	POG_GCA_000264555.1_01749	PCHLO6_RS08715	D:COG0455	K04562	Iron-sulfur cluster carrier protein	ATP-binding; Hydrolase; Iron; Iron-sulfur; Metal-binding; Nucleotide-binding.	Binds and transfers iron-sulfur (Fe-S) clusters to target apoproteins. Can hydrolyze ATP; Belongs to the Mrp/NBP35 ATP-binding proteins family.
20	POG_GCA_000264555.1_04890	PCHLO6_RS24190	D:COG0489	K03593	Iron-sulfur cluster carrier protein	ATP-binding; Hydrolase; Iron; Iron-sulfur; Metal-binding; Nucleotide-binding.	Binds and transfers iron-sulfur (Fe-S) clusters to target apoproteins. Can hydrolyze ATP; Belongs to the Mrp/NBP35 ATP-binding proteins family.
20	POG_GCA_000264555.1_05486	PCHLO6_RS27140	D:COG0772	K05837	Rod shape-determining protein RodA	Cell inner membrane; Cell membrane; Cell shape; Membrane; Transmembrane; Transmembrane helix.	Required for the maintenance of the rod cell shape; Belongs to the SEDS family. RodA subfamily.
20	POG_GCA_000264555.1_05092	PCHLO6_RS25195	D:COG0849	K03590	Cell division protein FtsA	Cell cycle; Cell division; Cell inner membrane; Cell membrane; Cell shape; Membrane.	Cell division protein that is involved in the assembly of the Z ring. May serve as a membrane anchor for the Z ring; Belongs to the FtsA/MreB family.
20	POG_GCA_000264555.1_04501	PCHLO6_RS22270	D:COG0850	K03610	Probable septum site-determining protein MinC	Cell cycle; Cell division; Septation.	Cell division inhibitor that blocks the formation of polar Z ring septums. Rapidly oscillates between the poles of the cell to destabilize FtsZ filaments that have formed before they mature into polar Z rings. Prevents FtsZ polymerization; Belongs to the MinC family.
20	POG_GCA_000264555.1_04503	PCHLO6_RS22280	D:COG0851	K03608	Cell division topological specificity factor	Cell cycle; Cell division.	Prevents the cell division inhibition by proteins MinC and MinD at internal division sites while permitting inhibition at polar sites. This ensures cell division at the proper site by restricting the formation of a division septum at the midpoint of the long axis of the cell; Belongs to the MinE family.
20	POG_GCA_000264555.1_00904	PCHLO6_RS04495	D:COG1077	K03569	Rod shape-determining protein MreB	Cell shape.	Involved in formation of the rod shape of the cell; Belongs to the FtsA/MreB family.
20	POG_GCA_000264555.1_06305	PCHLO6_RS31210	D:COG1192	K03496	Uncharacterized protein PP_0002		To B.subtilis soj.
20	POG_GCA_000264555.1_01757	PCHLO6_RS08755	D:COG1192	K03496	Uncharacterized protein PP_0002		To B.subtilis soj.
20	POG_GCA_000264555.1_00488	PCHLO6_RS02430	D:COG1192	K03496	Chromosome-partitioning ATPase Soj	ATP-binding; Chromosome partition; DNA-binding; Hydrolase; Nucleotide-binding.	ATPase probably involved in chromosome partitioning. Cooperatively binds dsDNA, forming nucleoprotein filaments in a strictly ATP-dependent fashion. Can also bind ssDNA with lower affinity; Belongs to the ParA family.
20	POG_GCA_000264555.1_02007	PCHLO6_RS09985	D:COG1196	K03529	Chromosome partition protein Smc	ATP-binding; Coiled coil; Cytoplasm; DNA-binding; Nucleotide-binding.	Required for chromosome condensation and partitioning; Belongs to the SMC family.
20	POG_GCA_000264555.1_03978	PCHLO6_RS19655	D:COG1674	K03466	DNA translocase FtsK	ATP-binding; Cell cycle; Cell division; Cell inner membrane; Cell membrane; Chromosome partition; DNA-binding; Membrane; Nucleotide-binding; Transmembrane; Transmembrane helix.	Essential cell division protein that coordinates cell division and chromosome segregation. The N-terminus is involved in assembly of the cell-division machinery. The C-terminus functions as a DNA motor that moves dsDNA in an ATP-dependent manner towards the dif recombination site, which is located within the replication terminus region. Translocation stops specifically at Xer-dif sites, where Fts…
20	POG_GCA_000264555.1_05859	PCHLO6_RS29005	D:COG2177	K09811	Cell division protein FtsX	Cell cycle; Cell division; Cell inner membrane; Cell membrane; Membrane; Transmembrane; Transmembrane helix.	Part of the ABC transporter FtsEX involved in cellular division; Belongs to the ABC-4 integral membrane protein family. FtsX subfamily.
20	POG_GCA_000264555.1_04502	PCHLO6_RS22275	D:COG2894	K03609	Septum site-determining protein MinD	ATP-binding; Cell cycle; Cell division; Cell membrane; Membrane; Nucleotide-binding; Septation.	ATPase required for the correct placement of the division site. Cell division inhibitors MinC and MinD act in concert to form an inhibitor capable of blocking formation of the polar Z ring septums. Rapidly oscillates between the poles of the cell to destabilize FtsZ filaments that have formed before they mature into polar Z rings (By similarity); Belongs to the ParA family. MinD subfamily.
20	POG_GCA_000264555.1_01680	PCHLO6_RS08375	D:COG2917	K06190	Probable intracellular septation protein A	Cell cycle; Cell division; Cell inner membrane; Cell membrane; Membrane; Septation; Transmembrane; Transmembrane helix.	Involved in cell divisio; probably involved in intracellular septation; Belongs to the YciB family.
20	POG_GCA_000264555.1_01189	PCHLO6_RS05925	D:COG2919	K05589	Cell division protein FtsB	Cell cycle; Cell division; Cell inner membrane; Cell membrane; Coiled coil; Membrane; Transmembrane; Transmembrane helix.	Essential cell division protein. May link together the upstream cell division proteins, which are predominantly cytoplasmic, with the downstream cell division proteins, which are predominantly periplasmic; Belongs to the FtsB family.
20	POG_GCA_000264555.1_00445	PCHLO6_RS02215	D:COG3087	K03642	cell division protein FtsN
20	POG_GCA_000264555.1_02008	PCHLO6_RS09990	D:COG3115	K03528	Cell division protein ZipA	Cell cycle; Cell division; Cell inner membrane; Cell membrane; Membrane; Septation; Transmembrane; Transmembrane helix.	Essential cell division protein that stabilizes the FtsZ protofilaments by cross-linking them and that serves as a cytoplasmic membrane anchor for the Z ring. Also required for the recruitment to the septal ring of downstream cell division proteins; Belongs to the ZipA family.
20	POG_GCA_000264555.1_05103	PCHLO6_RS25250	D:COG3116	K03586	Cell division protein FtsL	Cell cycle; Cell division; Cell inner membrane; Cell membrane; Membrane; Transmembrane; Transmembrane helix.	Essential cell division protein. May link together the upstream cell division proteins, which are predominantly cytoplasmic, with the downstream cell division proteins, which are predominantly periplasmic; Belongs to the FtsL family.
20	POG_GCA_000264555.1_00371	PCHLO6_RS01850	D:COG4942	K22719	Murein hydrolase activator EnvC	Cell cycle; Cell division; Coiled coil; Periplasm; Signal.	Activator of the cell wall hydrolases AmiA and AmiB. Required for septal murein cleavage and daughter cell separation during cell division. In vitro, exhibits weak endoproteolytic activity on beta-casein; Belongs to the peptidase M23B family.
20	POG_GCA_000264555.1_02061	PCHLO6_RS10255	D:COG5404	K13053	Cell division inhibitor SulA	Cell cycle; Cell division; DNA damage; DNA repair; Septation; SOS response.	Component of the SOS system and an inhibitor of cell division. Accumulation of SulA causes rapid cessation of cell division and the appearance of long, non-septate filaments. In the presence of GTP, binds a polymerization-competent form of FtsZ in a 1:1 ratio, thus inhibiting FtsZ polymerization and therefore preventing it from participating in the assembly of the Z ring. This mechanism prevents …
17	POG_GCA_000698865.1_03879	EY04_RS19160	DJ:COG2026		Toxin HigB-2	Toxin.	Toxic component of a toxin-antitoxin (TA) module. Inhibits translation by cleavage of mRNA.
18	POG_GCA_000264555.1_05752	PCHLO6_RS28465	DJ:COG2026	K06218	mRNA interferase RelE/StbE
20	POG_GCA_000264555.1_05633	argC,PCHLO6_RS27870	E:COG0002	K00145	N-acetyl-gamma-glutamyl-phosphate reductase	Amino-acid biosynthesis; Arginine biosynthesis; Cytoplasm; NADP; Oxidoreductase.	Belongs to the NAGSA dehydrogenase family. Type 1 subfamily.; KEGG: pae:PA0662 N-acetyl-gamma-glutamyl-phosphate reductase
18	POG_GCA_000264555.1_04176	argC,PCHLO6_RS20640	E:COG0002	K00145	N-acetyl-gamma-glutamyl-phosphate reductase	Amino-acid biosynthesis; Arginine biosynthesis; Cytoplasm; NADP; Oxidoreductase.	Belongs to the NAGSA dehydrogenase family. Type 2 subfamily.; KEGG: ppse:BN5_4457 N-acetyl-gamma-glutamyl-phosphate reductase
20	POG_GCA_000264555.1_04291	pepP,PCHLO6_RS21210	E:COG0006	K01262	Xaa-Pro aminopeptidase	Aminopeptidase; Hydrolase; Manganese; Metal-binding; Metalloprotease; Protease.	Catalyzes the removal of a penultimate prolyl residue from the N-termini of peptides; Belongs to the peptidase M24B family.; KEGG: pfl:PFL_4151 Xaa-Pro aminopeptidase
20	POG_GCA_000264555.1_05953	pepP,PCHLO6_RS29470	E:COG0006	K01262	Xaa-Pro aminopeptidase	Aminopeptidase; Cytoplasm; Hydrolase; Manganese; Metal-binding; Metalloprotease; Protease.	Belongs to the peptidase M24B family.; KEGG: pfe:PSF113_5660 Xaa-Pro aminopeptidase
20	POG_GCA_000264555.1_01651	gbuA,PCHLO6_RS08225	E:COG0010	K12255	Guanidinobutyrase	Hydrolase; Manganese; Metal-binding.	Catalyzes specifically the hydrolysis of 4- guanidinobutanoate to 4-aminobutanoate and urea. Has no activity against arginine, agmatine, 3-guanidinopropionate and guanidinoacetate; Belongs to the arginase family. Agmatinase subfamily.; KEGG: ppw:PputW619_3815 guanidinobutyrase
20	POG_GCA_000264555.1_05491	proA,PCHLO6_RS27165	E:COG0014	K00147	Glutamate-5-semialdehyde dehydrogenase	Amino-acid biosynthesis; Cytoplasm; NADP; Oxidoreductase; Proline biosynthesis.	Catalyzes the NADPH-dependent reduction of L-glutamate 5-phosphate into L-glutamate 5-semialdehyde and phosphate. The product spontaneously undergoes cyclization to form 1-pyrroline-5- carboxylate; Belongs to the gamma-glutamyl phosphate reductase family.; KEGG: pae:PA4007 glutamate-5-semialdehyde dehydrogenase
20	POG_GCA_000264555.1_06007	lysA,PCHLO6_RS29740	E:COG0019	K01586	Diaminopimelate decarboxylase	Amino-acid biosynthesis; Decarboxylase; Lyase; Lysine biosynthesis; Pyridoxal phosphate.	Specifically catalyzes the decarboxylation of meso- diaminopimelate (meso-DAP) to L-lysine; Belongs to the Orn/Lys/Arg decarboxylase class-II family. LysA subfamily.; KEGG: pmk:MDS_0324 diaminopimelate decarboxylase
19	POG_GCA_000264555.1_02398	lysA,PCHLO6_RS11915	E:COG0019	K01586	Diaminopimelate decarboxylase	Amino-acid biosynthesis; Decarboxylase; Lyase; Lysine biosynthesis; Pyridoxal phosphate.	Specifically catalyzes the decarboxylation of meso- diaminopimelate (meso-DAP) to L-lysine; Belongs to the Orn/Lys/Arg decarboxylase class-II family. LysA subfamily.; KEGG: pch:EY04_10665 diaminopimelate decarboxylase
18	POG_GCA_000264555.1_03315	lysA,PCHLO6_RS16410	E:COG0019	K01586	Diaminopimelate decarboxylase	Amino-acid biosynthesis; Decarboxylase; Lyase; Lysine biosynthesis; Pyridoxal phosphate.	Specifically catalyzes the decarboxylation of meso- diaminopimelate (meso-DAP) to L-lysine; Belongs to the Orn/Lys/Arg decarboxylase class-II family. LysA subfamily.; KEGG: pch:EY04_15715 diaminopimelate decarboxylase
20	POG_GCA_000264555.1_00866	ODC1,speC,speF,PCHLO6_RS04305	E:COG0019	K01581	Ornithine decarboxylase	Decarboxylase; Lyase; Polyamine biosynthesis; Pyridoxal phosphate.	Belongs to the Orn/Lys/Arg decarboxylase class-II family.; KEGG: ppu:PP_0864 ornithine decarboxylase
20	POG_GCA_000264555.1_02368	nspC,PCHLO6_RS11765	E:COG0019	K13747	Carboxynorspermidine decarboxylase	Cytoplasm; Decarboxylase; Lyase; Polyamine biosynthesis; Pyridoxal phosphate; Spermidine biosynthesis.	Catalyzes the decarboxylation of carboxynorspermidine and carboxyspermidine; Belongs to the Orn/Lys/Arg decarboxylase class-II family. NspC subfamily.; KEGG: ppu:PP_2929 carboxynorspermidine decarboxylase
20	POG_GCA_000264555.1_05287	ilvB,ilvG,ilvI,PCHLO6_RS26160	E:COG0028	K01652	Acetolactate synthase	Amino-acid biosynthesis; Branched-chain amino acid biosynthesis; FAD; Flavoprotein; Magnesium; Metal-binding; Thiamine pyrophosphate; Transferase.	Belongs to the TPP enzyme family.; KEGG: pfl:PFL_5255 acetolactate synthase I/II/III large subunit
20	POG_GCA_000264555.1_04856	ilvB,ilvG,ilvI,PCHLO6_RS24020	E:COG0028	K01652	Acetolactate synthase	Lyase; Thiamine pyrophosphate.	Cleavage of benzoin-anisoin acyloin linkage. Belongs to the TPP enzyme family.; KEGG: pre:PCA10_24310 acetolactate synthase I/II/III large subunit
18	POG_GCA_000264555.1_02706	mdlC,PCHLO6_RS13415	E:COG0028	K01576	Benzoylformate decarboxylase	Aromatic hydrocarbons catabolism; Calcium; Decarboxylase; Lyase; Magnesium; Mandelate pathway; Metal-binding; Thiamine pyrophosphate.	Belongs to the TPP enzyme family.; KEGG: pae:PA4901 benzoylformate decarboxylase
20	POG_GCA_000264555.1_01359	cysK,PCHLO6_RS06780	E:COG0031	K01738	Cysteine synthase	Amino-acid biosynthesis; Cysteine biosynthesis; Pyridoxal phosphate; Transferase.	Belongs to the cysteine synthase/cystathionine beta- synthase family.; KEGG: pfl:PFL_1287 cysteine synthase
20	POG_GCA_000264555.1_01597	cysK,PCHLO6_RS07955	E:COG0031	K01738	Cysteine synthase	Amino-acid biosynthesis; Cysteine biosynthesis; Pyridoxal phosphate; Transferase.	Belongs to the cysteine synthase/cystathionine beta- synthase family.; KEGG: pae:PA2709 cysteine synthase
20	POG_GCA_000264555.1_04575	cysM,PCHLO6_RS22630	E:COG0031	K12339	S-sulfo-L-cysteine synthase (O-acetyl-L-serine-dependent)	Amino-acid biosynthesis; Cysteine biosynthesis; Pyridoxal phosphate; Transferase.	Belongs to the cysteine synthase/cystathionine beta- synthase family.; KEGG: pae:PA0932 S-sulfo-L-cysteine synthase (O-acetyl-L-serine-dependent)
20	POG_GCA_000264555.1_00936	hisG,PCHLO6_RS04655	E:COG0040	K00765	ATP phosphoribosyltransferase	Amino-acid biosynthesis; ATP-binding; Cytoplasm; Glycosyltransferase; Histidine biosynthesis; Nucleotide-binding; Transferase.	Catalyzes the condensation of ATP and 5-phosphoribose 1- diphosphate to form N'-(5'-phosphoribosyl)-ATP (PR-ATP). Has a crucial role in the pathway because the rate of histidine biosynthesis seems to be controlled primarily by regulation of HisG enzymatic activity; Belongs to the ATP phosphoribosyltransferase family. Short subfamily.; KEGG: pae:PA4449 ATP phosphoribosyltransferase
20	POG_GCA_000264555.1_05285	ilvC,PCHLO6_RS26150	E:COG0059	K00053	Ketol-acid reductoisomerase (NADP(+))	Amino-acid biosynthesis; Branched-chain amino acid biosynthesis; NADP; Oxidoreductase.	Belongs to the ketol-acid reductoisomerase family.; KEGG: pae:PA4694 ketol-acid reductoisomerase
20	POG_GCA_000264555.1_02209	leuC,IPMI-L,PCHLO6_RS10995	E:COG0065	K01703	3-isopropylmalate dehydratase	4Fe-4S; Amino-acid biosynthesis; Branched-chain amino acid biosynthesis; Iron; Iron-sulfur; Leucine biosynthesis; Lyase; Metal-binding.	Catalyzes the isomerization between 2-isopropylmalate and 3-isopropylmalate, via the formation of 2-isopropylmaleate; Belongs to the aconitase/IPM isomerase family. LeuC type 1 subfamily.; KEGG: psu:Psesu_0436 3-isopropylmalate/(R)-2-methylmalate dehydratase large subunit
20	POG_GCA_000264555.1_02210	leuD,IPMI-S,PCHLO6_RS11000	E:COG0066	K01704	3-isopropylmalate dehydratase	Amino-acid biosynthesis; Branched-chain amino acid biosynthesis; Leucine biosynthesis; Lyase.	Catalyzes the isomerization between 2-isopropylmalate and 3-isopropylmalate, via the formation of 2-isopropylmaleate; Belongs to the LeuD family. LeuD type 1 subfamily.; KEGG: bfl:Bfl130 3-isopropylmalate/(R)-2-methylmalate dehydratase small subunit
17	POG_GCA_000264555.1_03836	gltB,PCHLO6_RS18975	E:COG0069	K00265	Glutamate synthase (NADPH)	Cell membrane; Membrane; Transmembrane; Transmembrane helix.	Belongs to the glutamate synthase family.; KEGG: ttf:THTE_0667 glutamate synthase (NADPH) large chain
20	POG_GCA_000264555.1_04943	gltB,PCHLO6_RS24455	E:COG0069	K00265	Glutamate synthase (NADPH)	Cell membrane; Membrane; Transmembrane; Transmembrane helix.	Belongs to the glutamate synthase family.; KEGG: ttf:THTE_0667 glutamate synthase (NADPH) large chain
20	POG_GCA_000264555.1_00460	gltB,PCHLO6_RS02290	E:COG0070|E:COG0069|E:COG0067	K00265	Glutamate synthase (NADPH)	3Fe-4S; Amino-acid biosynthesis; Coiled coil; FAD; Flavoprotein; FMN; Glutamate biosynthesis; Glutamine amidotransferase; Iron; Iron-sulfur; Metal-binding; NAD; Oxidoreductase; Phosphoprotein; Zymogen.	Forms L-glutamate from L-glutamine and 2-oxoglutarate. Represents an alternative pathway to L-glutamate dehydrogenase for the biosynthesis of L-glutamate. Participates with glutamine synthetase in ammonia assimilation processes. The enzyme is specific for NADH, L-glutamine and 2-oxoglutarate; Belongs to the glutamate synthase family; Contains 1 glutamine amidotransferase type-2 domain.; KEGG: por…
20	POG_GCA_000264555.1_04060	phnW,PCHLO6_RS20070	E:COG0075	K03430	2-aminoethylphosphonate--pyruvate transaminase	Aminotransferase; Pyridoxal phosphate; Pyruvate; Transferase.	Involved in phosphonate degradation; Belongs to the class-V pyridoxal-phosphate-dependent aminotransferase family. PhnW subfamily.; KEGG: pfo:Pfl01_3683 2-aminoethylphosphonate-pyruvate transaminase
20	POG_GCA_000264555.1_04752	OTC,argF,argI,PCHLO6_RS23500	E:COG0078	K00611	Ornithine carbamoyltransferase	Arginine metabolism; Cytoplasm; Transferase.	Reversibly catalyzes the transfer of the carbamoyl group from carbamoyl phosphate (CP) to the N(epsilon) atom of ornithine (ORN) to produce L-citrulline; Belongs to the ATCase/OTCase family.; KEGG: pshi:SAMEA2665130_0480 ornithine carbamoyltransferase
20	POG_GCA_000264555.1_04910	OTC,argF,argI,PCHLO6_RS24290	E:COG0078	K00611	Ornithine carbamoyltransferase	Amino-acid biosynthesis; Arginine biosynthesis; Cytoplasm; Transferase.	Reversibly catalyzes the transfer of the carbamoyl group from carbamoyl phosphate (CP) to the N(epsilon) atom of ornithine (ORN) to produce L-citrulline, which is a substrate for argininosuccinate synthetase, the enzyme involved in the final step in arginine biosynthesis; Belongs to the ATCase/OTCase family.; KEGG: pprc:PFLCHA0_c48440 ornithine carbamoyltransferase
20	POG_GCA_000264555.1_04434	hisC,PCHLO6_RS21930	E:COG0079	K00817	Histidinol-phosphate transaminase	Amino-acid biosynthesis; Aminotransferase; Histidine biosynthesis; Pyridoxal phosphate; Transferase.	Belongs to the class-II pyridoxal-phosphate-dependent aminotransferase family. Histidinol-phosphate aminotransferase subfamily.; KEGG: pfl:PFL_4311 histidinol-phosphate aminotransferase
20	POG_GCA_000264555.1_00938	hisC,PCHLO6_RS04665	E:COG0079	K00817	Histidinol-phosphate transaminase	Amino-acid biosynthesis; Aminotransferase; Histidine biosynthesis; Pyridoxal phosphate; Transferase.	Belongs to the class-II pyridoxal-phosphate-dependent aminotransferase family. Histidinol-phosphate aminotransferase subfamily.; KEGG: pae:PA4447 histidinol-phosphate aminotransferase
20	POG_GCA_000264555.1_04554	PCHLO6_RS22530	E:COG0079	K02225	Threonine-phosphate decarboxylase	Cobalamin biosynthesis; Cytoplasm; Lyase; Pyridoxal phosphate.	Decarboxylates L-threonine-O-3-phosphate to yield (R)-1- amino-2-propanol O-2-phosphate, the precursor for the linkage between the nucleotide loop and the corrin ring in cobalamin; Belongs to the class-I pyridoxal-phosphate-dependent aminotransferase family.
20	POG_GCA_000264555.1_04475	aroC,PCHLO6_RS22140	E:COG0082	K01736	Chorismate synthase	Amino-acid biosynthesis; Aromatic amino acid biosynthesis; FAD; Flavoprotein; FMN; Lyase; NADP.	Catalyzes the anti-1,4-elimination of the C-3 phosphate and the C-6 proR hydrogen from 5-enolpyruvylshikimate-3-phosphate (EPSP) to yield chorismate, which is the branch point compound that serves as the starting substrate for the three terminal pathways of aromatic amino acid biosynthesis. This reaction introduces a second double bond into the aromatic ring system; Belongs to the chorismate synt…
20	POG_GCA_000264555.1_00366	hisA,PCHLO6_RS01825	E:COG0106	K01814	1-(5-phosphoribosyl)-5-((5-phosphoribosylamino)methylideneamino)imidazole-4-carboxamideisomerase	Amino-acid biosynthesis; Cytoplasm; Histidine biosynthesis; Isomerase.	Belongs to the HisA/HisF family.; KEGG: ece:Z3186 phosphoribosylformimino-5-aminoimidazole carboxamide ribotide isomerase
20	POG_GCA_000264555.1_00367	hisF,PCHLO6_RS01830	E:COG0107	K02500	Imidazole glycerol phosphate synthase subunit hisF1	Amino-acid biosynthesis; Cytoplasm; Histidine biosynthesis; Lyase.	IGPS catalyzes the conversion of PRFAR and glutamine to IGP, AICAR and glutamate. The HisF subunit catalyzes the cyclization activity that produces IGP and AICAR from PRFAR using the ammonia provided by the HisH subunit (By similarity); Belongs to the HisA/HisF family.; KEGG: pae:PA5140 cyclase; Oxo-acid-lyases
20	POG_GCA_000264555.1_05907	serA,PHGDH,PCHLO6_RS29245	E:COG0111	K00058	Phosphoglycerate dehydrogenase	Amino-acid biosynthesis; NAD; Oxidoreductase; Serine biosynthesis.	Belongs to the D-isomer specific 2-hydroxyacid dehydrogenase family; Contains 1 ACT domain.; KEGG: pae:PA0316 D-3-phosphoglycerate dehydrogenase / 2-oxoglutarate reductase
20	POG_GCA_000264555.1_02048	pdxB,PCHLO6_RS10190	E:COG0111	K03473	4-phosphoerythronate dehydrogenase	Cytoplasm; NAD; Oxidoreductase; Pyridoxine biosynthesis.	Catalyzes the oxidation of erythronate-4-phosphate to 3- hydroxy-2-oxo-4-phosphonooxybutanoate; Belongs to the D-isomer specific 2-hydroxyacid dehydrogenase family. PdxB subfamily.; KEGG: lpv:HYN51_15250 erythronate-4-phosphate dehydrogenase
18	POG_GCA_000264555.1_03266	serA,PHGDH,PCHLO6_RS16165	E:COG0111	K00058	Phosphoglycerate dehydrogenase	NAD; Oxidoreductase.	Belongs to the D-isomer specific 2-hydroxyacid dehydrogenase family.; KEGG: salu:DC74_6904 D-3-phosphoglycerate dehydrogenase / 2-oxoglutarate reductase
19	POG_GCA_000264555.1_02984	serA,PHGDH,PCHLO6_RS14795	E:COG0111	K00058	Phosphoglycerate dehydrogenase	Cytoplasm; NAD; Oxidoreductase.	Belongs to the D-isomer specific 2-hydroxyacid dehydrogenase family. GyaR subfamily.; KEGG: pub:SAR11_1366 D-3-phosphoglycerate dehydrogenase / 2-oxoglutarate reductase
20	POG_GCA_000264555.1_01575	ghrA,PCHLO6_RS07845	E:COG0111	K12972	Glyoxylate reductase (NADP(+))	NAD; Oxidoreductase.	Belongs to the D-isomer specific 2-hydroxyacid dehydrogenase family.; KEGG: bbro:BAU06_13855 glyoxylate/hydroxypyruvatereductase
19	POG_GCA_000264555.1_03342	ghrA,PCHLO6_RS16545	E:COG0111	K12972	Glyoxylate reductase (NADP(+))	Cytoplasm; NAD; Oxidoreductase.	Belongs to the D-isomer specific 2-hydroxyacid dehydrogenase family. GyaR subfamily.; KEGG: por:APT59_10590 glyoxylate/hydroxypyruvatereductase
20	POG_GCA_000264555.1_05737	glyA,SHMT,PCHLO6_RS28390	E:COG0112	K00600	Glycine hydroxymethyltransferase	Amino-acid biosynthesis; Cytoplasm; One-carbon metabolism; Pyridoxal phosphate; Transferase.	Catalyzes the reversible interconversion of serine and glycine with tetrahydrofolate (THF) serving as the one-carbon carrier. This reaction serves as the major source of one-carbon groups required for the biosynthesis of purines, thymidylate, methionine, and other important biomolecules. Also exhibits THF- independent aldolase activity toward beta-hydroxyamino acids, producing glycine and aldehyd…
20	POG_GCA_000264555.1_05392	glyA,SHMT,PCHLO6_RS26685	E:COG0112	K00600	Glycine hydroxymethyltransferase	Amino-acid biosynthesis; Cytoplasm; One-carbon metabolism; Pyridoxal phosphate; Transferase.	Catalyzes the reversible interconversion of serine and glycine with tetrahydrofolate (THF) serving as the one-carbon carrier. This reaction serves as the major source of one-carbon groups required for the biosynthesis of purines, thymidylate, methionine, and other important biomolecules. Also exhibits THF- independent aldolase activity toward beta-hydroxyamino acids, producing glycine and aldehyd…
20	POG_GCA_000264555.1_02548	ilvE,PCHLO6_RS12655	E:COG0115	K00826	Branched-chain-amino-acid transaminase	Amino-acid biosynthesis; Aminotransferase; Branched-chain amino acid biosynthesis; Pyridoxal phosphate; Transferase.	Acts on leucine, isoleucine and valine; Belongs to the class-IV pyridoxal-phosphate-dependent aminotransferase family.; KEGG: ppu:PP_3511 branched-chain amino acid aminotransferase
20	POG_GCA_000264555.1_01901	pabC,PCHLO6_RS09465	E:COG0115	K02619	Aminodeoxychorismate lyase	Folate biosynthesis; Lyase; Pyridoxal phosphate.	Involved in the biosynthesis of p-aminobenzoate (PABA), a precursor of tetrahydrofolate. Converts 4-amino-4- deoxychorismate into 4-aminobenzoate (PABA) and pyruvate; Belongs to the class-IV pyridoxal-phosphate-dependent aminotransferase family.; KEGG: ppu:PP_1917 4-amino-4-deoxychorismate lyase
20	POG_GCA_000264555.1_00364	hisH,PCHLO6_RS01815	E:COG0118	K02501	Imidazole glycerol phosphate synthase subunit HisH 1	Amino-acid biosynthesis; Cytoplasm; Glutamine amidotransferase; Histidine biosynthesis; Transferase.	IGPS catalyzes the conversion of PRFAR and glutamine to IGP, AICAR and glutamate. The HisH subunit provides the glutamine amidotransferase activity that produces the ammonia necessary to HisF for the synthesis of IGP and AICAR (By similarity); Contains 1 glutamine amidotransferase type-1 domain.; KEGG: pae:PA5142 glutamine amidotransferase; Pentosyltransferases
20	POG_GCA_000264555.1_04986	leuA,IMS,PCHLO6_RS24670	E:COG0119	K01649	2-isopropylmalate synthase	Amino-acid biosynthesis; Branched-chain amino acid biosynthesis; Leucine biosynthesis; Transferase.	Catalyzes the condensation of the acetyl group of acetyl-CoA with 3-methyl-2-oxobutanoate (2-oxoisovalerate) to form 3-carboxy-3-hydroxy-4-methylpentanoate (2-isopropylmalate); Belongs to the alpha-IPM synthase/homocitrate synthase family. LeuA type 2 subfamily.; KEGG: pae:PA3792 2-isopropylmalate synthase
20	POG_GCA_000264555.1_04034	HMGCL,hmgL,PCHLO6_RS19940	E:COG0119	K01640	Hydroxymethylglutaryl-CoA lyase	Acetylation; Cytoplasm; Endoplasmic reticulum; Lipoprotein; Lyase; Membrane; Metal-binding; Myristate.	Non-mitochondrial 3-hydroxymethyl-3-methylglutaryl-CoA lyase that catalyzes a cation-dependent cleavage of (S)-3-hydroxy- 3-methylglutaryl-CoA into acetyl-CoA and acetoacetate, a key step in ketogenesis, the products of which support energy production in nonhepatic animal tissues; Belongs to the HMG-CoA lyase family.; KEGG: lue:DCD74_05180 hydroxymethylglutaryl-CoA lyase
20	POG_GCA_000264555.1_05878	ilvD,PCHLO6_RS29100	E:COG0129	K01687	Dihydroxy-acid dehydratase	4Fe-4S; Amino-acid biosynthesis; Branched-chain amino acid biosynthesis; Iron; Iron-sulfur; Lyase; Metal-binding.	Belongs to the IlvD/Edd family.; KEGG: xfa:XF_0099 dihydroxy-acid dehydratase
20	POG_GCA_000264555.1_04738	edd,PCHLO6_RS23430	E:COG0129	K01690	Phosphogluconate dehydratase	Lyase.	Belongs to the IlvD/Edd family.; KEGG: mmk:MU9_719 phosphogluconate dehydratase
20	POG_GCA_000264555.1_00363	hisB,PCHLO6_RS01810	E:COG0131	K01693	Imidazoleglycerol-phosphate dehydratase	Amino-acid biosynthesis; Cytoplasm; Histidine biosynthesis; Lyase.	Belongs to the imidazoleglycerol-phosphate dehydratase family.; KEGG: pae:PA5143 imidazoleglycerol-phosphate dehydratase
20	POG_GCA_000264555.1_00041	trpB,PCHLO6_RS00205	E:COG0133	K01696	Tryptophan synthase	Amino-acid biosynthesis; Aromatic amino acid biosynthesis; Lyase; Pyridoxal phosphate; Tryptophan biosynthesis.	The beta subunit is responsible for the synthesis of L- tryptophan from indole and L-serine; Belongs to the TrpB family.; KEGG: pfl:PFL_0037 tryptophan synthase beta chain
20	POG_GCA_000264555.1_05643	trpC,PCHLO6_RS27920	E:COG0134	K01609	Indole-3-glycerol-phosphate synthase	Amino-acid biosynthesis; Aromatic amino acid biosynthesis; Decarboxylase; Lyase; Tryptophan biosynthesis.	Belongs to the TrpC family.; KEGG: pae:PA0651 indole-3-glycerol phosphate synthase
20	POG_GCA_000264555.1_02217	trpF,PCHLO6_RS11035	E:COG0135	K01817	Phosphoribosylanthranilate isomerase	Amino-acid biosynthesis; Aromatic amino acid biosynthesis; Isomerase; Tryptophan biosynthesis.	Belongs to the TrpF family.; KEGG: pae:PA3113 phosphoribosylanthranilate isomerase
20	POG_GCA_000264555.1_02212	asd,PCHLO6_RS11010	E:COG0136	K00133	Aspartate-semialdehyde dehydrogenase	Amino-acid biosynthesis; Diaminopimelate biosynthesis; Lysine biosynthesis; Methionine biosynthesis; NADP; Oxidoreductase; Threonine biosynthesis.	Catalyzes the NADPH-dependent formation of L-aspartate- semialdehyde (L-ASA) by the reductive dephosphorylation of L- aspartyl-4-phosphate; Belongs to the aspartate-semialdehyde dehydrogenase family.; KEGG: bfl:Bfl574 aspartate-semialdehyde dehydrogenase
20	POG_GCA_000264555.1_02213	asd,PCHLO6_RS11015	E:COG0136	K00133	Aspartate-semialdehyde dehydrogenase	Amino-acid biosynthesis; Diaminopimelate biosynthesis; Lysine biosynthesis; Methionine biosynthesis; NADP; Oxidoreductase; Threonine biosynthesis.	Catalyzes the NADPH-dependent formation of L-aspartate- semialdehyde (L-ASA) by the reductive dephosphorylation of L- aspartyl-4-phosphate; Belongs to the aspartate-semialdehyde dehydrogenase family.; KEGG: gni:GNIT_2200 aspartate-semialdehyde dehydrogenase
20	POG_GCA_000264555.1_04900	argG,ASS1,PCHLO6_RS24240	E:COG0137	K01940	Argininosuccinate synthase	Amino-acid biosynthesis; Arginine biosynthesis; ATP-binding; Cytoplasm; Ligase; Nucleotide-binding.	Belongs to the argininosuccinate synthase family. Type 1 subfamily.; KEGG: pds:CAY62_13210 argininosuccinate synthase
19	POG_GCA_000264555.1_06245	hisI,PCHLO6_RS30905	E:COG0139	K01496	Phosphoribosyl-AMP cyclohydrolase	Amino-acid biosynthesis; Cytoplasm; Histidine biosynthesis; Hydrolase; Magnesium; Metal-binding; Zinc.	Catalyzes the hydrolysis of the adenine ring of phosphoribosyl-AMP; Belongs to the PRA-CH family.; KEGG: pfl:PFL_6181 phosphoribosyl-AMP cyclohydrolase
20	POG_GCA_000264555.1_00431	hisI,PCHLO6_RS02145	E:COG0139	K01496	Phosphoribosyl-AMP cyclohydrolase	Amino-acid biosynthesis; Cytoplasm; Histidine biosynthesis; Hydrolase; Magnesium; Metal-binding; Zinc.	Catalyzes the hydrolysis of the adenine ring of phosphoribosyl-AMP; Belongs to the PRA-CH family.; KEGG: pae:PA5066 phosphoribosyl-AMP cyclohydrolase
20	POG_GCA_000264555.1_00430	hisE,PCHLO6_RS02140	E:COG0140	K01523	Phosphoribosyl-ATP diphosphatase	Amino-acid biosynthesis; ATP-binding; Cytoplasm; Histidine biosynthesis; Hydrolase; Nucleotide-binding.	Belongs to the PRA-PH family.; KEGG: pae:PA5067 phosphoribosyl-ATP pyrophosphohydrolase
20	POG_GCA_000264555.1_00937	hisD,PCHLO6_RS04660	E:COG0141	K00013	Histidinol dehydrogenase	Amino-acid biosynthesis; Histidine biosynthesis; Metal-binding; NAD; Oxidoreductase; Zinc.	Catalyzes the sequential NAD-dependent oxidations of L- histidinol to L-histidinaldehyde and then to L-histidine; Belongs to the histidinol dehydrogenase family.; KEGG: palc:A0T30_05690 histidinol dehydrogenase
20	POG_GCA_000264555.1_05647	trpE,PCHLO6_RS27940	E:COG0147	K01657	Anthranilate synthase	Amino-acid biosynthesis; Aromatic amino acid biosynthesis; Lyase; Magnesium; Metal-binding; Tryptophan biosynthesis.	Part of a heterotetrameric complex that catalyzes the two-step biosynthesis of anthranilate, an intermediate in the biosynthesis of L-tryptophan. In the first step, the glutamine- binding beta subunit (TrpG) of anthranilate synthase (AS) provides the glutamine amidotransferase activity which generates ammonia as a substrate that, along with chorismate, is used in the second step, catalyzed by the…
20	POG_GCA_000264555.1_01967	pabB,PCHLO6_RS09790	E:COG0147	K01665	Aminodeoxychorismate synthase	Folate biosynthesis; Magnesium; Transferase.	Part of a heterodimeric complex that catalyzes the two- step biosynthesis of 4-amino-4-deoxychorismate (ADC), a precursor of p-aminobenzoate (PABA) and tetrahydrofolate. In the first step, a glutamine amidotransferase (PabA) generates ammonia as a substrate that, along with chorismate, is used in the second step, catalyzed by aminodeoxychorismate synthase (PabB) to produce ADC; Belongs to the ant…
20	POG_GCA_000264555.1_00040	trpA,PCHLO6_RS00200	E:COG0159	K01695	Tryptophan synthase	Amino-acid biosynthesis; Aromatic amino acid biosynthesis; Lyase; Tryptophan biosynthesis.	The alpha subunit is responsible for the aldol cleavage of indoleglycerol phosphate to indole and glyceraldehyde 3- phosphate; Belongs to the TrpA family.; KEGG: xoo:XOO3251 tryptophan synthase alpha chain
20	POG_GCA_000264555.1_04311	ectB,dat,PCHLO6_RS21310	E:COG0160	K00836	Diaminobutyrate--2-oxoglutarate transaminase	Aminotransferase; Pyridoxal phosphate; Transferase.	Belongs to the class-III pyridoxal-phosphate-dependent aminotransferase family.; KEGG: pae:PA2413 diaminobutyrate-2-oxoglutarate transaminase
20	POG_GCA_000264555.1_04930	rocD,OAT,PCHLO6_RS24390	E:COG0160	K00819	Ornithine aminotransferase	Aminotransferase; Pyridoxal phosphate; Transferase.	Belongs to the class-III pyridoxal-phosphate-dependent aminotransferase family.; KEGG: kla:KLLA0_B05247g ornithine--oxo-acid transaminase
18	POG_GCA_000264555.1_03317	ectB,dat,PCHLO6_RS16420	E:COG0160	K00836	Diaminobutyrate--2-oxoglutarate transaminase	Aminotransferase; Pyridoxal phosphate; Transferase.	Catalyzes reversively the conversion of L-aspartate beta-semialdehyde (ASA) to L-2,4-diaminobutyrate (DABA) by transamination with L-glutamate; Belongs to the class-III pyridoxal-phosphate-dependent aminotransferase family.; KEGG: pch:EY04_15725 diaminobutyrate-2-oxoglutarate transaminase
20	POG_GCA_000264555.1_00205	davT,gabT,PCHLO6_RS01025	E:COG0160	K14268	5-aminovalerate transaminase	Aminotransferase; Pyridoxal phosphate; Transferase.	Catalyzes the conversion of 5-aminovalerate to 5- oxopentanoate; Belongs to the class-III pyridoxal-phosphate-dependent aminotransferase family.; KEGG: pae:PA0266 5-aminovalerate/4-aminobutyrate aminotransferase
20	POG_GCA_000264555.1_05045	gabT,PCHLO6_RS24960	E:COG0160	K07250	4-aminobutyrate--2-oxoglutarate transaminase	Amino-acid biosynthesis; Aminotransferase; Arginine biosynthesis; Cytoplasm; Pyridoxal phosphate; Transferase.	Belongs to the class-III pyridoxal-phosphate-dependent aminotransferase family. ArgD subfamily.; KEGG: csu:CSUB_C1058 4-aminobutyrate aminotransferase / (S)-3-amino-2-methylpropionate transaminase
20	POG_GCA_000264555.1_05808	bioA,PCHLO6_RS28745	E:COG0161	K00833	Adenosylmethionine--8-amino-7-oxononanoate transaminase	Aminotransferase; Biotin biosynthesis; Cytoplasm; Pyridoxal phosphate; S-adenosyl-L-methionine; Transferase.	Catalyzes the transfer of the alpha-amino group from S- adenosyl-L-methionine (SAM) to 7-keto-8-aminopelargonic acid (KAPA) to form 7,8-diaminopelargonic acid (DAPA). It is the only animotransferase known to utilize SAM as an amino donor; Belongs to the class-III pyridoxal-phosphate-dependent aminotransferase family. BioA subfamily.; KEGG: pmy:Pmen_0413 adenosylmethionine---8-amino-7-oxononanoate…
19	POG_GCA_000264555.1_03424	spuC,PCHLO6_RS16950	E:COG0161	K12256	Putrescine--pyruvate transaminase	Aminotransferase; Biotin biosynthesis; Cytoplasm; Pyridoxal phosphate; S-adenosyl-L-methionine; Transferase.	Catalyzes the transfer of the alpha-amino group from S- adenosyl-L-methionine (SAM) to 7-keto-8-aminopelargonic acid (KAPA) to form 7,8-diaminopelargonic acid (DAPA). It is the only animotransferase known to utilize SAM as an amino donor; Belongs to the class-III pyridoxal-phosphate-dependent aminotransferase family. BioA subfamily.; KEGG: bgf:BC1003_1769 putrescine---pyruvate transaminase
20	POG_GCA_000264555.1_05921	spuC,PCHLO6_RS29315	E:COG0161	K12256	Putrescine--pyruvate transaminase	Aminotransferase; Mitochondrion; Pyridoxal phosphate; Transferase; Transit peptide.	Transaminase that degrades gamma-amino butyric acid (GABA); Belongs to the class-III pyridoxal-phosphate-dependent aminotransferase family.; KEGG: ppun:PP4_52540 putrescine---pyruvate transaminase
20	POG_GCA_000264555.1_00733	PCHLO6_RS03645	E:COG0161	K00822	Beta-alanine--pyruvate transaminase	Aminotransferase; Pyridoxal phosphate; Transferase.	Catalyzes transamination between a variety of omega- amino acids, mono and diamines, and pyruvate. Plays a pivotal role in the metabolism of the omega amino acids; Belongs to the class-III pyridoxal-phosphate-dependent aminotransferase family.; KEGG: pch:EY04_03020 beta-alanine--pyruvate transaminase
19	POG_GCA_000264555.1_03404	bioA,PCHLO6_RS16850	E:COG0161	K00833	Adenosylmethionine--8-amino-7-oxononanoate transaminase	Aminotransferase; Biotin biosynthesis; Cytoplasm; Pyridoxal phosphate; S-adenosyl-L-methionine; Transferase.	Catalyzes the transfer of the alpha-amino group from S- adenosyl-L-methionine (SAM) to 7-keto-8-aminopelargonic acid (KAPA) to form 7,8-diaminopelargonic acid (DAPA). It is the only animotransferase known to utilize SAM as an amino donor; Belongs to the class-III pyridoxal-phosphate-dependent aminotransferase family. BioA subfamily.; KEGG: gsu:GSU1582 adenosylmethionine---8-amino-7-oxononanoate a…
18	POG_GCA_000264555.1_01796	puuE,PCHLO6_RS08945	E:COG0161	K00823	4-aminobutyrate--2-oxoglutarate transaminase	Amino-acid biosynthesis; Aminotransferase; Cytoplasm; Proline biosynthesis; Pyridoxal phosphate; Transferase.	Catalyzes the interconversion of ornithine to glutamate semialdehyde; Belongs to the class-III pyridoxal-phosphate-dependent aminotransferase family. OAT subfamily.; KEGG: miz:BAB75_25085 4-aminobutyrate aminotransferase
20	POG_GCA_000264555.1_05998	argH,ASL,PCHLO6_RS29695	E:COG0165	K01755	Argininosuccinate lyase	Amino-acid biosynthesis; Arginine biosynthesis; Cytoplasm; Lyase.	Belongs to the lyase 1 family. Argininosuccinate lyase subfamily.; KEGG: pmy:Pmen_0277 argininosuccinate lyase
19	POG_GCA_000264555.1_05419	aroE,PCHLO6_RS26815	E:COG0169	K00014	Shikimate dehydrogenase	Amino-acid biosynthesis; Aromatic amino acid biosynthesis; NAD; Oxidoreductase.	Involved in the biosynthesis of the chorismate, which leads to the biosynthesis of aromatic amino acids, and plays a key role in the quinate degradation pathway. Catalyzes the NAD(+)- dependent oxidation of both quinate and shikimate to 3- dehydroquinate and 3-dehydroshikimate, respectively; Belongs to the shikimate dehydrogenase family.; KEGG: pman:OU5_4277 shikimate dehydrogenase
20	POG_GCA_000264555.1_00032	aroE,PCHLO6_RS00160	E:COG0169	K00014	Shikimate dehydrogenase	Amino-acid biosynthesis; Aromatic amino acid biosynthesis; NADP; Oxidoreductase.	Involved in the biosynthesis of the chorismate, which leads to the biosynthesis of aromatic amino acids. Catalyzes the reversible NADPH linked reduction of 3-dehydroshikimate (DHSA) to yield shikimate (SA); Belongs to the shikimate dehydrogenase family.; KEGG: tpty:NCTC11468_00165 shikimate dehydrogenase
20	POG_GCA_000264555.1_04091	aroE,PCHLO6_RS20225	E:COG0169	K00014	Shikimate dehydrogenase	NADP; Oxidoreductase.	The physiological substrate is not known. Has much lower activity towards shikimate than AroE; Belongs to the shikimate dehydrogenase family.; KEGG: pfl:PFL_4005 shikimate dehydrogenase
20	POG_GCA_000264555.1_00393	glnA,GLUL,PCHLO6_RS01955	E:COG0174	K01915	Glutamine synthetase	ATP-binding; Cytoplasm; Ligase; Nitrogen fixation; Nucleotide-binding; Phosphoprotein.	Belongs to the glutamine synthetase family.; KEGG: pre:PCA10_53350 glutamine synthetase
19	POG_GCA_000264555.1_02426	glnA,GLUL,PCHLO6_RS12055	E:COG0174	K01915	Glutamine synthetase	ATP-binding; Ligase; Nucleotide-binding.	Involved in the breakdown of putrescine via the biosynthesis of gamma-L-glutamylputrescine. It is able to use several diamines, spermidine and spermine. Absolutely essential to utilize putrescine as both nitrogen and carbon sources and to decrease the toxicity of putrescine, which can lead to inhibition of cell growth and protein synthesis; Belongs to the glutamine synthetase family.; KEGG: pae:P…
20	POG_GCA_000264555.1_05925	glnA,GLUL,PCHLO6_RS29330	E:COG0174	K01915	Glutamine synthetase	ATP-binding; Ligase; Nucleotide-binding.	Involved in the breakdown of putrescine via the biosynthesis of gamma-L-glutamylputrescine. It is able to use several diamines, spermidine and spermine. Absolutely essential to utilize putrescine as both nitrogen and carbon sources and to decrease the toxicity of putrescine, which can lead to inhibition of cell growth and protein synthesis; Belongs to the glutamine synthetase family.; KEGG: pmy:P…
20	POG_GCA_000264555.1_02508	glnA,GLUL,PCHLO6_RS12465	E:COG0174	K01915	Glutamine synthetase	ATP-binding; Cytoplasm; Ligase; Nucleotide-binding.	Belongs to the glutamine synthetase family.; KEGG: pfl:PFL_2473 glutamine synthetase
20	POG_GCA_000264555.1_05922	glnA,GLUL,PCHLO6_RS29320	E:COG0174	K01915	Glutamine synthetase	ATP-binding; Ligase; Nucleotide-binding.	Involved in the breakdown of putrescine via the biosynthesis of gamma-L-glutamylputrescine. It is able to use several diamines, spermidine and spermine. Absolutely essential to utilize putrescine as both nitrogen and carbon sources and to decrease the toxicity of putrescine, which can lead to inhibition of cell growth and protein synthesis; Belongs to the glutamine synthetase family.; KEGG: ppu:P…
20	POG_GCA_000264555.1_03324	glnA,GLUL,PCHLO6_RS16455	E:COG0174	K01915	Glutamine synthetase	ATP-binding; Ligase; Nucleotide-binding.	Belongs to the glutamine synthetase family.; KEGG: ppu:PP_3148 glutamine synthetase
19	POG_GCA_000264555.1_02320	glnA,GLUL,PCHLO6_RS11530	E:COG0174	K01915	Glutamine synthetase	ATP-binding; Ligase; Nucleotide-binding.	Involved in the degradation of isopropylamine, which is a constituent of the herbicides atrazine. Catalyze the ATP- dependent formation of gamma-glutamyl-isopropylamide from isopropylamine and L-glutamate. It can also use aminoalkanes, amino-alcohols (L-alaninol and D-alaninol) and amino-esters as substrates; Belongs to the glutamine synthetase family.; KEGG: pch:EY04_10285 glutamine synthetase
19	POG_GCA_000264555.1_04612	glnA,GLUL,PCHLO6_RS22815	E:COG0174	K01915	Glutamine synthetase	ATP-binding; Cytoplasm; Ligase; Nucleotide-binding; Phosphoprotein.	Belongs to the glutamine synthetase family.; KEGG: palc:A0T30_11170 glutamine synthetase
20	POG_GCA_000264555.1_00016	gmhB,PCHLO6_RS00080	E:COG0241	K03273	D-glycero-beta-D-manno-heptose 1,7-bisphosphate 7-phosphatase	Carbohydrate metabolism; Cytoplasm; Hydrolase; Magnesium; Metal-binding; Zinc.	Converts the D-glycero-beta-D-manno-heptose 1,7- bisphosphate (beta-HBP) intermediate into D-glycero-beta-D-manno- heptose 1-phosphate by removing the phosphate group at the C-7 position; Belongs to the GmhB family.; KEGG: pmy:Pmen_0012 D-glycero-D-manno-heptose 1,7-bisphosphate phosphatase
20	POG_GCA_000264555.1_02242	aspQ,ansB,ansA,PCHLO6_RS11155	E:COG0252	K05597	Glutamin-(asparagin-)ase	Hydrolase; Periplasm; Signal.	Belongs to the asparaginase 1 family; Contains 1 asparaginase/glutaminase domain.; KEGG: pbc:CD58_10640 glutamin-(asparagin-)ase
20	POG_GCA_000264555.1_06205	ansA,ansB,PCHLO6_RS30715	E:COG0252	K01424	Asparaginase	Cytoplasm; Hydrolase.	Belongs to the asparaginase 1 family; Contains 1 asparaginase/glutaminase domain.; KEGG: pch:EY04_29970 L-asparaginase
19	POG_GCA_000264555.1_04115	dapF,PCHLO6_RS20340	E:COG0253	K01778	Diaminopimelate epimerase		KEGG: pkc:PKB_1786 diaminopimelate epimerase
20	POG_GCA_000264555.1_06008	dapF,PCHLO6_RS29745	E:COG0253	K01778	Diaminopimelate epimerase	Amino-acid biosynthesis; Cytoplasm; Disulfide bond; Isomerase; Lysine biosynthesis.	Catalyzes the stereoinversion of LL-2,6- diaminoheptanedioate (L,L-DAP) to meso-diaminoheptanedioate (meso- DAP), a precursor of L-lysine and an essential component of the bacterial peptidoglycan; Belongs to the diaminopimelate epimerase family.; KEGG: rhd:R2APBS1_3951 diaminopimelate epimerase
19	POG_GCA_000264555.1_02555	dapF,PCHLO6_RS12690	E:COG0253	K01778	Diaminopimelate epimerase	Amino-acid biosynthesis; Cytoplasm; Disulfide bond; Isomerase; Lysine biosynthesis.	Catalyzes the stereoinversion of LL-2,6- diaminoheptanedioate (L,L-DAP) to meso-diaminoheptanedioate (meso- DAP), a precursor of L-lysine and an essential component of the bacterial peptidoglycan; Belongs to the diaminopimelate epimerase family.; KEGG: pvr:PverR02_17515 diaminopimelate epimerase
20	POG_GCA_000264555.1_01062	CARP,pepA,PCHLO6_RS05290	E:COG0260	K01255	Leucyl aminopeptidase	Aminopeptidase; Cytoplasm; Hydrolase; Manganese; Metal-binding; Protease.	Presumably involved in the processing and regular turnover of intracellular proteins. Catalyzes the removal of unsubstituted N-terminal amino acids from various peptides; Belongs to the peptidase M17 family.; KEGG: ppu:PP_0980 leucyl aminopeptidase
20	POG_GCA_000264555.1_05372	proB,PCHLO6_RS26585	E:COG0263	K00931	Glutamate 5-kinase	Amino-acid biosynthesis; ATP-binding; Cytoplasm; Kinase; Nucleotide-binding; Proline biosynthesis; Transferase.	Catalyzes the transfer of a phosphate group to glutamate to form L-glutamate 5-phosphate; Belongs to the glutamate 5-kinase family; Contains 1 PUA domain.; KEGG: ppi:YSA_06450 glutamate 5-kinase
20	POG_GCA_000264555.1_04433	aroA,PCHLO6_RS21925	E:COG0287|E:COG0128	K00800	3-phosphoshikimate 1-carboxyvinyltransferase	Amino-acid biosynthesis; Aromatic amino acid biosynthesis; NAD; Oxidoreductase; Tyrosine biosynthesis.	Contains 1 ACT domain; Contains 1 prephenate/arogenate dehydrogenase domain.; KEGG: pre:PCA10_39150 3-phosphoshikimate 1-carboxyvinyltransferase
20	POG_GCA_000264555.1_00827	dapB,PCHLO6_RS04105	E:COG0289	K00215	4-hydroxy-tetrahydrodipicolinate reductase	Amino-acid biosynthesis; Cytoplasm; Diaminopimelate biosynthesis; Lysine biosynthesis; NAD; NADP; Oxidoreductase.	Catalyzes the conversion of 4-hydroxy- tetrahydrodipicolinate (HTPA) to tetrahydrodipicolinate; Belongs to the DapB family.; KEGG: pae:PA4759 4-hydroxy-tetrahydrodipicolinate reductase
20	POG_GCA_000264555.1_02878	pepN,PCHLO6_RS14275	E:COG0308	K01256	Membrane alanyl aminopeptidase	Aminopeptidase; Cytoplasm; Hydrolase; Metal-binding; Metalloprotease; Protease; Zinc.	Displays aminopeptidase activity with a broad substrate specificity. Preferentially hydrolyzes L-Lys-AMC but also shows strong activity against L-Ala-AMC, L-Arg-AMC and L-Leu-AMC; Belongs to the peptidase M1 family.; KEGG: pae:PA3083 aminopeptidase N
18	POG_GCA_000264555.1_01451	lhpC,PCHLO6_RS07235	E:COG0329	K21062	1-pyrroline-4-hydroxy-2-carboxylate deaminase	Cytoplasm; Lyase; Plasmid; Schiff base.	Upon expression in E.coli complements a dapA deletion mutation, but this may not be its physiological function. Belongs to the DapA family.; KEGG: eas:Entas_0543 1-pyrroline-4-hydroxy-2-carboxylate deaminase
18	POG_GCA_000264555.1_00893	kdgD,PCHLO6_RS04440	E:COG0329	K01707	5-dehydro-4-deoxyglucarate dehydratase	Lyase.	Belongs to the DapA family.; KEGG: pmy:Pmen_1215 5-dehydro-4-deoxyglucarate dehydratase
20	POG_GCA_000264555.1_01432	dapA,PCHLO6_RS07140	E:COG0329	K01714	4-hydroxy-tetrahydrodipicolinate synthase	Amino-acid biosynthesis; Cytoplasm; Diaminopimelate biosynthesis; Lyase; Lysine biosynthesis; Schiff base.	Catalyzes the condensation of (S)-aspartate-beta- semialdehyde [(S)-ASA] and pyruvate to 4-hydroxy- tetrahydrodipicolinate (HTPA); Belongs to the DapA family.; KEGG: pch:EY04_06260 4-hydroxy-tetrahydrodipicolinate synthase
20	POG_GCA_000264555.1_01492	dapA,PCHLO6_RS07435	E:COG0329	K01714	4-hydroxy-tetrahydrodipicolinate synthase	Amino-acid biosynthesis; Cytoplasm; Diaminopimelate biosynthesis; Lyase; Lysine biosynthesis; Schiff base.	Catalyzes the condensation of (S)-aspartate-beta- semialdehyde [(S)-ASA] and pyruvate to 4-hydroxy- tetrahydrodipicolinate (HTPA); Belongs to the DapA family.; KEGG: bva:BVAF_518 4-hydroxy-tetrahydrodipicolinate synthase
20	POG_GCA_000264555.1_05389	gdhA,PCHLO6_RS26670	E:COG0334	K00262	Glutamate dehydrogenase (NADP(+))	NADP; Oxidoreductase.	Catalyzes the reversible oxidative deamination of glutamate to alpha-ketoglutarate and ammonia; Belongs to the Glu/Leu/Phe/Val dehydrogenases family.; KEGG: ppu:PP_0675 glutamate dehydrogenase (NADP+)
20	POG_GCA_000264555.1_00979	PCHLO6_RS04875	E:COG0334	K00263	Leucine dehydrogenase	NAD; Oxidoreductase.	Catalyzes the reversible, NAD-dependent deamination of L-phenylalanine to phenyl pyruvate, ammonia and NADH; Belongs to the Glu/Leu/Phe/Val dehydrogenases family.; KEGG: ppu:PP_4617 leucine dehydrogenase
20	POG_GCA_000264555.1_00458	aroB,PCHLO6_RS02280	E:COG0337	K01735	3-dehydroquinate synthase	Amino-acid biosynthesis; Aromatic amino acid biosynthesis; Cobalt; Cytoplasm; Lyase; NAD; Zinc.	Belongs to the dehydroquinate synthase family.; KEGG: ppu:PP_5078 3-dehydroquinate synthase
20	POG_GCA_000264555.1_00055	prlC,PCHLO6_RS00275	E:COG0339	K01414	Oligopeptidase A	Hydrolase; Metal-binding; Metalloprotease; Protease; Zinc.	May play a specific role in the degradation of signal peptides after they are released from precursor forms of secreted proteins. Can cleave N-acetyl-L-Ala(4) (By similarity); Belongs to the peptidase M3 family.; KEGG: pfl:PFL_0050 oligopeptidase A
20	POG_GCA_000264555.1_05843	proC,PCHLO6_RS28925	E:COG0345	K00286	Pyrroline-5-carboxylate reductase	Amino-acid biosynthesis; Cytoplasm; NADP; Oxidoreductase; Proline biosynthesis.	Catalyzes the reduction of 1-pyrroline-5-carboxylate (PCA) to L-proline; Belongs to the pyrroline-5-carboxylate reductase family.; KEGG: ppu:PP_5095 pyrroline-5-carboxylate reductase
20	POG_GCA_000264555.1_01438	fosA5,PCHLO6_RS07170	E:COG0346	K21265	Glutathione transferase	Antibiotic resistance; Cytoplasm; Manganese; Metal-binding; Potassium; Transferase.	Metalloglutathione transferase which confers resistance to fosfomycin by catalyzing the addition of glutathione to fosfomycin; Belongs to the fosfomycin resistance protein family.; KEGG: kpn:KPN_04759 glutathione S-transferase fosA5
19	POG_GCA_000264555.1_02014	PCHLO6_RS10020	E:COG0346		hypothetical protein
20	POG_GCA_000264555.1_06014	PCHLO6_RS29775	E:COG0347	K04752	Nitrogen regulatory protein P-II	Nucleotide-binding; Phosphoprotein; Transcription; Transcription regulation.	In nitrogen-limiting conditions, when the ratio of Gln to 2-ketoglutarate decreases, P-II is uridylylated to P-II-UMP. P- II-UMP allows the deadenylation of glutamine synthetase (GS), thus activating the enzyme. Conversely, in nitrogen excess P-II is deuridylated and promotes the adenylation of GS. P-II indirectly controls the transcription of the GS gene (glnA). P-II prevents NR-II-catalyzed con…
20	POG_GCA_000264555.1_04458	asnB,ASNS,PCHLO6_RS22055	E:COG0367	K01953	Asparagine synthase (glutamine-hydrolyzing)	Amino-acid biosynthesis; Asparagine biosynthesis; ATP-binding; Glutamine amidotransferase; Ligase; Nucleotide-binding.	Main asparagine synthetase in vegetative cells. Belongs to the asparagine synthetase family; Contains 1 glutamine amidotransferase type-2 domain.; KEGG: pmy:Pmen_2955 asparagine synthase (glutamine-hydrolysing)
19	POG_GCA_000264555.1_03147	arnB,pmrH,PCHLO6_RS15585	E:COG0399	K07806	UDP-4-amino-4-deoxy-L-arabinose aminotransferase	Aminotransferase; Antibiotic resistance; Lipid A biosynthesis; Lipid biosynthesis; Lipid metabolism; Lipopolysaccharide biosynthesis; Pyridoxal phosphate; Transferase.	Catalyzes the conversion of UDP-4-keto-arabinose (UDP- Ara4O) to UDP-4-amino-4-deoxy-L-arabinose (UDP-L-Ara4N). The modified arabinose is attached to lipid A and is required for resistance to polymyxin and cationic antimicrobial peptides; Belongs to the DegT/DnrJ/EryC1 family. ArnB subfamily.; KEGG: pch:EY04_14450 UDP-4-amino-4-deoxy-L-arabinose-oxoglutarate aminotransferase
20	POG_GCA_000264555.1_05944	arnB,pmrH,PCHLO6_RS29425	E:COG0399	K07806	UDP-4-amino-4-deoxy-L-arabinose aminotransferase	Aminotransferase; Antibiotic resistance; Lipid A biosynthesis; Lipid biosynthesis; Lipid metabolism; Lipopolysaccharide biosynthesis; Pyridoxal phosphate; Transferase.	Catalyzes the conversion of UDP-4-keto-arabinose (UDP- Ara4O) to UDP-4-amino-4-deoxy-L-arabinose (UDP-L-Ara4N). The modified arabinose is attached to lipid A and is required for resistance to polymyxin and cationic antimicrobial peptides; Belongs to the DegT/DnrJ/EryC1 family. ArnB subfamily.; KEGG: por:APT59_21360 UDP-4-amino-4-deoxy-L-arabinose-oxoglutarate aminotransferase
19	POG_GCA_000264555.1_04618	wbpE,wlbC,PCHLO6_RS22845	E:COG0399	K13017	UDP-2-acetamido-2-deoxy-ribo-hexuluronate aminotransferase	Antibiotic biosynthesis; Cell membrane; DNA-binding; Membrane; Pyridoxal phosphate; Transcription; Transcription regulation; Two-component regulatory system.	Sensor protein that transfers the signal of environmental stimuli to the regulatory region of target genes to activate or repress transcription of erythromycin biosynthesis genes; Belongs to the DegT/DnrJ/EryC1 family.; KEGG: gsb:GSUB_15330 UDP-2-acetamido-2-deoxy-ribo-hexuluronate aminotransferase
20	POG_GCA_000264555.1_05734	soxA,PCHLO6_RS28375	E:COG0404	K00302	Sarcosine oxidase	Cytoplasm; FAD; Flavoprotein; Oxidoreductase.	Catalyzes the oxidative demethylation of sarcosine to yield glycine, hydrogen peroxide and 5,10- methylenetetrahydrofolate. Belongs to the GcvT family.; KEGG: pfl:PFL_5726 sarcosine oxidase, subunit alpha
20	POG_GCA_000264555.1_04759	gcvT,AMT,PCHLO6_RS23535	E:COG0404	K00605	Aminomethyltransferase	Aminotransferase; Transferase.	The glycine cleavage system catalyzes the degradation of glycine; Belongs to the GcvT family.; KEGG: pst:PSPTO_1275 aminomethyltransferase
20	POG_GCA_000264555.1_05948	gcvT,AMT,PCHLO6_RS29445	E:COG0404	K00605	Aminomethyltransferase	Aminotransferase; Transferase.	The glycine cleavage system catalyzes the degradation of glycine; Belongs to the GcvT family.; KEGG: lpv:HYN51_12900 aminomethyltransferase
20	POG_GCA_000264555.1_05227	ggt,PCHLO6_RS25870	E:COG0405	K00681	Gamma-glutamyltransferase	Acyltransferase; Glutathione biosynthesis; Hydrolase; Protease; Secreted; Signal; Transferase; Zymogen.	Belongs to the gamma-glutamyltransferase family.; KEGG: pch:EY04_26310 gamma-glutamyltranspeptidase / glutathione hydrolase
20	POG_GCA_000264555.1_00771	ggt,PCHLO6_RS03820	E:COG0405	K00681	Gamma-glutamyltransferase	Acyltransferase; Glutathione biosynthesis; Hydrolase; Periplasm; Protease; Signal; Transferase; Zymogen.	Belongs to the gamma-glutamyltransferase family.; KEGG: pfl:PFL_0771 gamma-glutamyltranspeptidase / glutathione hydrolase
19	POG_GCA_000264555.1_03168	ggt,PCHLO6_RS15685	E:COG0405	K00681	Gamma-glutamyltransferase	Acyltransferase; Glutathione biosynthesis; Hydrolase; Periplasm; Protease; Signal; Transferase; Zymogen.	Belongs to the gamma-glutamyltransferase family.; KEGG: pcq:PcP3B5_25380 gamma-glutamyltranspeptidase / glutathione hydrolase
17	POG_GCA_000264555.1_02651	PCHLO6_RS13155	E:COG0410	K01996	Phosphonates import ATP-binding protein PhnC	ATP-binding; Cell membrane; Hydrolase; Membrane; Nucleotide-binding; Phosphonate transport; Transport.	Part of the ABC transporter complex PhnCDE involved in phosphonates import. Responsible for energy coupling to the transport system; Belongs to the ABC transporter superfamily. Phosphonates importer (TC 3.A.1.9.1) family; Contains 1 ABC transporter domain.
20	POG_GCA_000264555.1_00080	znuC,PCHLO6_RS00400	E:COG0411|E:COG0410	K09817	Ribose import ATP-binding protein RbsA	ATP-binding; Cell inner membrane; Cell membrane; Hydrolase; Membrane; Nucleotide-binding; Repeat; Sugar transport; Transport.	Part of the ABC transporter complex RbsABCD involved in ribose import. Responsible for energy coupling to the transport system; Belongs to the ABC transporter superfamily. Ribose importer (TC 3.A.1.2.1) family; Contains 2 ABC transporter domains.; KEGG: pfn:HZ99_18195 zinc transport system ATP-binding protein; Acting on acid anhydrides; catalyzing transmembrane movement of substances
20	POG_GCA_000264555.1_04373	speE,SRM,PCHLO6_RS21625	E:COG0421	K00797	Spermidine synthase	Methyltransferase; Transferase.	Belongs to the methyltransferase superfamily.; KEGG: mmt:Metme_2207 spermidine synthase
19	POG_GCA_000264555.1_01582	speE,SRM,PCHLO6_RS07880	E:COG0421	K00797	Spermidine synthase		KEGG: maq:Maqu_2514 spermidine synthase
20	POG_GCA_000264555.1_04693	alaC,PCHLO6_RS23215	E:COG0436	K14261	Glutamate-pyruvate aminotransferase AlaC	Aminotransferase; Cytoplasm; Pyridoxal phosphate; Transferase.	Involved in the biosynthesis of alanine; Belongs to the class-I pyridoxal-phosphate-dependent aminotransferase family.; KEGG: pst:PSPTO_5058 alanine-synthesizing transaminase; Transaminases
20	POG_GCA_000264555.1_04367	alaA,PCHLO6_RS21590	E:COG0436	K14260	Valine--pyruvate transaminase	Aminotransferase; Cytoplasm; Pyridoxal phosphate; Transferase.	Involved in the biosynthesis of alanine; Belongs to the class-I pyridoxal-phosphate-dependent aminotransferase family.; KEGG: pae:PA2828 alanine-synthesizing transaminase
20	POG_GCA_000264555.1_01165	dapC,PCHLO6_RS05805	E:COG0436	K14267	Succinyldiaminopimelate transaminase	Aminotransferase; Cytoplasm; Pyridoxal phosphate; Transferase.	Belongs to the class-I pyridoxal-phosphate-dependent aminotransferase family.; KEGG: pci:PCH70_12450 N-succinyldiaminopimelate aminotransferase
20	POG_GCA_000264555.1_03478	aruH,PCHLO6_RS17220	E:COG0436	K12252	Arginine--pyruvate transaminase	Aminotransferase; Arginine metabolism; Pyridoxal phosphate; Pyruvate; Transferase.	Catalyzes the conversion of L-arginine into 2- ketoarginine via transamination. L-arginine is the best substrate, but it can also use L-lysine, L-methionine, L-leucine, ornithine and L-glutamine, which indicates that it may have a broader physiological function in amino acid catabolism; Belongs to the class-I pyridoxal-phosphate-dependent aminotransferase family.; KEGG: pfl:PFL_3354 arginine:pyru…
20	POG_GCA_000264555.1_05302	aspB,PCHLO6_RS26235	E:COG0436	K00812	Aspartate transaminase	Aminotransferase; Cytoplasm; Pyridoxal phosphate; Transferase.	Catalyzes the transamination reaction between 4- (hydroxymethyl)-2-furancarboxaldehyde phosphate (4-HFC-P) and alanine to produce pyruvate and 5-(aminomethyl)-3-furanmethanol phosphate (F1-P), the precursor for the furan moiety in methanofuran; Belongs to the class-I pyridoxal-phosphate-dependent aminotransferase family.; KEGG: xne:XNC1_2154 aspartate aminotransferase
20	POG_GCA_000264555.1_04989	ybdL,PCHLO6_RS24685	E:COG0436	K14287	Methionine transaminase	Aminotransferase; Cytoplasm; Pyridoxal phosphate; Transferase.	Shows aminotransferase activity with methionine and histidine as substrates, and to a lesser extent also with phenylalanine; Belongs to the class-I pyridoxal-phosphate-dependent aminotransferase family.; KEGG: pre:PCA10_11500 methionine transaminase
20	POG_GCA_000264555.1_05286	ilvH,ilvN,PCHLO6_RS26155	E:COG0440	K01653	Acetolactate synthase	Amino-acid biosynthesis; Branched-chain amino acid biosynthesis; Transferase.	Belongs to the acetolactate synthase small subunit family; Contains 1 ACT domain.; KEGG: lrz:BJI69_08750 acetolactate synthase I/III small subunit
20	POG_GCA_000264555.1_01098	PCHLO6_RS05475	E:COG0460	K00003	Homoserine dehydrogenase	Amino-acid biosynthesis; Branched-chain amino acid biosynthesis; Isoleucine biosynthesis; Methionine biosynthesis; NADP; Oxidoreductase; Threonine biosynthesis.	Belongs to the homoserine dehydrogenase family; Contains 1 ACT domain.; KEGG: pae:PA3736 homoserine dehydrogenase
20	POG_GCA_000264555.1_02211	leuB,IMDH,PCHLO6_RS11005	E:COG0473	K00052	3-isopropylmalate dehydrogenase	Amino-acid biosynthesis; Branched-chain amino acid biosynthesis; Cytoplasm; Leucine biosynthesis; Magnesium; Manganese; Metal-binding; NAD; Oxidoreductase.	Catalyzes the oxidation of 3-carboxy-2-hydroxy-4- methylpentanoate (3-isopropylmalate) to 3-carboxy-4-methyl-2- oxopentanoate. The product decarboxylates to 4-methyl-2 oxopentanoate; Belongs to the isocitrate and isopropylmalate dehydrogenases family. LeuB type 1 subfamily.; KEGG: xfa:XF_2372 3-isopropylmalate dehydrogenase
20	POG_GCA_000264555.1_00461	gltD,PCHLO6_RS02295	E:COG0493	K00266	Glutamate synthase (NADPH)	4Fe-4S; Amino-acid biosynthesis; Glutamate biosynthesis; Iron; Iron-sulfur; Metal-binding; NADP; Oxidoreductase.	Contains 1 4Fe-4S ferredoxin-type domain.; KEGG: pmy:Pmen_0551 glutamate synthase (NADPH) small chain
20	POG_GCA_000264555.1_02563	preT,PCHLO6_RS12730	E:COG0493	K17722	Dihydrouracil dehydrogenase (NAD(+))	4Fe-4S; Acetylation; Cytoplasm; FAD; Flavoprotein; FMN; Iron; Iron-sulfur; Metal-binding; NADP; Nucleotide-binding; Oxidoreductase; Repeat.	Involved in pyrimidine base degradation. Catalyzes the reduction of uracil and thymine. Belongs to the dihydropyrimidine dehydrogenase family; Contains 3 4Fe-4S ferredoxin-type domains.; KEGG: pfl:PFL_2547 dihydropyrimidine dehydrogenase (NAD+) subunit PreT
20	POG_GCA_000264555.1_01099	thrC,PCHLO6_RS05480	E:COG0498	K01733	Threonine synthase	Alternative splicing; Cytokine; Lyase; Polymorphism; Pyridoxal phosphate; Secreted.	Isoform 1: Acts as a catabolic phospho-lyase on both gamma- and beta-phosphorylated substrates. Degrades O-phospho- threonine (PThr) to alpha-ketobutyrate, ammonia and phosphate (By similarity); Isoform SOFAT: Potent inducer of osteoblastic production of IL6. May act to exacerbate inflammation and/or bone turnover under inflammatory conditions; Belongs to the threonine synthase family.; KEGG: xca…
20	POG_GCA_000264555.1_00499	putA,PCHLO6_RS02485	E:COG0506|E:COG4230	K13821	Proline dehydrogenase	DNA-binding; FAD; Flavoprotein; Multifunctional enzyme; NAD; Oxidoreductase; Proline metabolism; Repressor; Transcription; Transcription regulation.	Oxidizes proline to glutamate for use as a carbon and nitrogen source and also function as a transcriptional repressor of the put operon. In the N-terminal sectio; belongs to the proline dehydrogenase family; In the C-terminal sectio; belongs to the aldehyde dehydrogenase family.; KEGG: eco:b1014 RHH-type transcriptional regulator, proline utilization regulon repressor / proline dehydrogenase / d…
20	POG_GCA_000264555.1_04756	PCHLO6_RS23520	E:COG0509	K02437	Glycine cleavage system H protein 1	Lipoyl.	The glycine cleavage system catalyzes the degradation of glycine. The H protein shuttles the methylamine group of glycine from the P protein to the T protein; Belongs to the GcvH family; Contains 1 lipoyl-binding domain.
20	POG_GCA_000264555.1_05947	PCHLO6_RS29440	E:COG0509	K02437	Glycine cleavage system H protein 2	Lipoyl.	The glycine cleavage system catalyzes the degradation of glycine. The H protein shuttles the methylamine group of glycine from the P protein to the T protein; Belongs to the GcvH family; Contains 1 lipoyl-binding domain.
20	POG_GCA_000264555.1_05645	pabA,PCHLO6_RS27930	E:COG0512	K01664	Aminodeoxychorismate synthase	Amino-acid biosynthesis; Aromatic amino acid biosynthesis; Folate biosynthesis; Glutamine amidotransferase; Lyase; Transferase; Tryptophan biosynthesis.	Part of a heterodimeric complex that catalyzes the two- step biosynthesis of 4-amino-4-deoxychorismate (ADC), a precursor of p-aminobenzoate (PABA) and tetrahydrofolate. In the first step, a glutamine amidotransferase (PabA) generates ammonia as a substrate that, along with chorismate, is used in the second step, catalyzed by aminodeoxychorismate synthase (PabB) to produce ADC. PabA converts glut…
20	POG_GCA_000264555.1_04230	cefD,PCHLO6_RS20910	E:COG0520	K04127	Isopenicillin-N epimerase	Cytoplasm; Lyase; Nucleus; Pyridoxal phosphate.	Catalyzes the conversion of hercynylcysteine sulfoxide to ergothioneine by cleaving the cysteine residue at the sulfur atom, the last step in the biosynthesis pathway of ergothioneine; Belongs to the class-V pyridoxal-phosphate-dependent aminotransferase family. EgtE subfamily.; KEGG: mbd:MEBOL_001410 isopenicillin-N epimerase
20	POG_GCA_000264555.1_01161	csdA,PCHLO6_RS05785	E:COG0520	K01766	Probable cysteine desulfurase	Pyridoxal phosphate; Transferase.	Catalyzes the removal of elemental sulfur and selenium atoms from L-cysteine, L-cystine, L-selenocysteine, and L- selenocystine to produce L-alanine; Belongs to the class-V pyridoxal-phosphate-dependent aminotransferase family. Csd subfamily.; KEGG: pae:PA3667 cysteine sulfinate desulfinase; Carbon-sulfur lyases
20	POG_GCA_000264555.1_04723	EGT2,PCHLO6_RS23355	E:COG0520	K20247	Hercynylcysteine S-oxide lyase		KEGG: ptm:GSPATT00030799001 hercynylcysteine S-oxide lyase
20	POG_GCA_000264555.1_01907	sufS,PCHLO6_RS09490	E:COG0520	K11717	Cysteine desulfurase	Aminotransferase; Cytoplasm; Nucleus; Pyridoxal phosphate; Transferase.	Belongs to the class-V pyridoxal-phosphate-dependent aminotransferase family.; KEGG: meth:MBMB1_1951 cysteine desulfurase / selenocysteine lyase
20	POG_GCA_000264555.1_04631	lysC,PCHLO6_RS22910	E:COG0527	K00928	Aspartate kinase	Alternative initiation; Amino-acid biosynthesis; ATP-binding; Diaminopimelate biosynthesis; Kinase; Lysine biosynthesis; Nucleotide-binding; Repeat; Transferase.	Catalyzes the phosphorylation of the beta-carboxyl group of aspartic acid with ATP to yield 4-phospho-L-aspartate, which is involved in the branched biosynthetic pathway leading to the biosynthesis of amino acids threonine, isoleucine and methionine; Belongs to the aspartokinase family; Contains 2 ACT domains.; KEGG: vsp:VS_2582 aspartate kinase
19	POG_GCA_000264555.1_02806	PCHLO6_RS13920	E:COG0531	K11733	General amino acid permease AGP1	Amino-acid transport; Cell membrane; Lipoprotein; Membrane; Palmitate; Transmembrane; Transmembrane helix; Transport.	Broad substrate range permease which transports asparagine and glutamine with intermediate specificity. Also transports Ala, Cys, Gly, Ser, Thr, Cys, Met, Phe, Tyr, Ile, Leu and Val. Important for the utilization of amino acids as a nitrogen source (By similarity); Belongs to the amino acid-polyamine-organocation (APC) superfamily. YAT (TC 2.A.3.10) family.
20	POG_GCA_000264555.1_01452	PCHLO6_RS07240	E:COG0531	K11734	Aspartate-proton symporter	Amino-acid transport; Cell membrane; Membrane; Symport; Transmembrane; Transmembrane helix; Transport.	Uptake of L-aspartate with the concomitant import of a proton. Can also transport aspartate hydroxamate and L-glutamate with lower affinity and efficiency. Belongs to the amino acid-polyamine-organocation (APC) superfamily. AGT (TC 2.A.3.11) family.
16	POG_GCA_000264555.1_05505	PCHLO6_RS27235	E:COG0531	K16238	Uncharacterized transporter R00093	Cell membrane; Membrane; Transmembrane; Transmembrane helix; Transport.	Probable amino-acid or metabolite transport protein. Belongs to the amino acid-polyamine-organocation (APC) superfamily.
20	POG_GCA_000264555.1_04750	PCHLO6_RS23490	E:COG0531	K03758	Arginine/ornithine antiporter	Amino-acid transport; Antiport; Cell inner membrane; Cell membrane; Membrane; Transmembrane; Transmembrane helix; Transport.	Catalyzes an electroneutral exchange between arginine and ornithine to allow high-efficiency energy conversion in the arginine deiminase pathway. Belongs to the amino acid-polyamine-organocation (APC) superfamily.
20	POG_GCA_000264555.1_04749	PCHLO6_RS23485	E:COG0531	K03758	Arginine/ornithine antiporter	Amino-acid transport; Antiport; Cell inner membrane; Cell membrane; Membrane; Transmembrane; Transmembrane helix; Transport.	Catalyzes an electroneutral exchange between arginine and ornithine to allow high-efficiency energy conversion in the arginine deiminase pathway. Belongs to the amino acid-polyamine-organocation (APC) superfamily.
20	POG_GCA_000264555.1_03398	PCHLO6_RS16820	E:COG0531	K03294	Uncharacterized amino acid permease YfnA	Cell membrane; Membrane; Transmembrane; Transmembrane helix.	Belongs to the amino acid-polyamine-organocation (APC) superfamily.
19	POG_GCA_000264555.1_04418	PCHLO6_RS21855	E:COG0531	K16238	Uncharacterized transporter R00093	Cell membrane; Membrane; Transmembrane; Transmembrane helix; Transport.	Probable amino-acid or metabolite transport protein. Belongs to the amino acid-polyamine-organocation (APC) superfamily.
19	POG_GCA_000264555.1_02318	PCHLO6_RS11520	E:COG0531	K11734	Probable amino acid-proton symporter YbeC	Amino-acid transport; Cell membrane; Membrane; Symport; Transmembrane; Transmembrane helix; Transport.	Uptake of an yet unknown amino-acid with the concomitant import of a proton; Belongs to the amino acid-polyamine-organocation (APC) superfamily. AGT (TC 2.A.3.11) family.
20	POG_GCA_000264555.1_05644	trpD,PCHLO6_RS27925	E:COG0547	K00766	Anthranilate phosphoribosyltransferase	Amino-acid biosynthesis; Aromatic amino acid biosynthesis; Glycosyltransferase; Magnesium; Metal-binding; Transferase; Tryptophan biosynthesis.	Catalyzes the transfer of the phosphoribosyl group of 5- phosphorylribose-1-pyrophosphate (PRPP) to anthranilate to yield N-(5'-phosphoribosyl)-anthranilate (PRA); Belongs to the anthranilate phosphoribosyltransferase family.; KEGG: ppu:PP_0421 anthranilate phosphoribosyltransferase
20	POG_GCA_000264555.1_03971	trpD,PCHLO6_RS19620	E:COG0547	K00766	Anthranilate phosphoribosyltransferase	Amino-acid biosynthesis; Aromatic amino acid biosynthesis; Glycosyltransferase; Magnesium; Metal-binding; Transferase; Tryptophan biosynthesis.	Catalyzes the transfer of the phosphoribosyl group of 5- phosphorylribose-1-pyrophosphate (PRPP) to anthranilate to yield N-(5'-phosphoribosyl)-anthranilate (PRA); Belongs to the anthranilate phosphoribosyltransferase family.; KEGG: reh:H16_A0356 anthranilate phosphoribosyltransferase
20	POG_GCA_000264555.1_06134	argB,PCHLO6_RS30355	E:COG0548	K00930	Acetylglutamate kinase	Amino-acid biosynthesis; Arginine biosynthesis; ATP-binding; Cytoplasm; Kinase; Nucleotide-binding; Transferase.	Belongs to the acetylglutamate kinase family.; KEGG: pmy:Pmen_4380 acetylglutamate kinase
20	POG_GCA_000264555.1_05935	argAB,PCHLO6_RS29380	E:COG0548|E:COG1246	K14682	Amino-acid N-acetyltransferase	Acyltransferase; Amino-acid biosynthesis; Arginine biosynthesis; Cytoplasm; Transferase.	Belongs to the acetyltransferase family. ArgA subfamily; Contains 1 N-acetyltransferase domain.; KEGG: pae:PA5204 amino-acid N-acetyltransferase
20	POG_GCA_000264555.1_04753	arcC,PCHLO6_RS23505	E:COG0549	K00926	Carbamate kinase	Arginine metabolism; ATP-binding; Cytoplasm; Kinase; Nucleotide-binding; Transferase.	Belongs to the carbamate kinase family.; KEGG: spe:Spro_3187 carbamate kinase
20	POG_GCA_000264555.1_00631	PCHLO6_RS03140	E:COG0559	K11960	High-affinity branched-chain amino acid transport system permease protein LivH	Amino-acid transport; Cell inner membrane; Cell membrane; Membrane; Transmembrane; Transmembrane helix; Transport.	Part of the binding-protein-dependent transport system for branched-chain amino acids. Probably responsible for the translocation of the substrates across the membrane (By similarity); Belongs to the binding-protein-dependent transport system permease family. LivHM subfamily.
20	POG_GCA_000264555.1_01372	PCHLO6_RS06840	E:COG0559	K01997	High-affinity branched-chain amino acid transport system permease protein BraD	Amino-acid transport; Cell inner membrane; Cell membrane; Membrane; Transmembrane; Transmembrane helix; Transport.	Component of the high affinity leucine, isoleucine, valine, transport system (LIV-I), which is operative without Na(+) and is specific for alanine and threonine, in addition to branched-chain amino acids. Belongs to the binding-protein-dependent transport system permease family. LivHM subfamily.
20	POG_GCA_000264555.1_00596	PCHLO6_RS02965	E:COG0559	K01997	High-affinity branched-chain amino acid transport system permease protein BraD	Amino-acid transport; Cell inner membrane; Cell membrane; Membrane; Transmembrane; Transmembrane helix; Transport.	Component of the high affinity leucine, isoleucine, valine, transport system (LIV-I), which is operative without Na(+) and is specific for alanine and threonine, in addition to branched-chain amino acids. Belongs to the binding-protein-dependent transport system permease family. LivHM subfamily.
17	POG_GCA_000264555.1_02648	PCHLO6_RS13140	E:COG0559	K01997	branched-chain amino acid transport system permease protein
20	POG_GCA_000264555.1_05898	serB,PSPH,PCHLO6_RS29200	E:COG0560	K01079	Phosphoserine phosphatase	Hydrolase; Magnesium; Metal-binding.	Belongs to the SerB family.; KEGG: xce:Xcel_1419 phosphoserine phosphatase
20	POG_GCA_000264555.1_04516	serB-plsC,PCHLO6_RS22340	E:COG0560	K15781	Phosphoserine phosphatase	Hydrolase; Magnesium; Metal-binding.	Belongs to the SerB family.; KEGG: rer:RER_16270 putative phosphoserine phosphatase / 1-acylglycerol-3-phosphate O-acyltransferase
20	POG_GCA_000264555.1_01966	thrH,PCHLO6_RS09785	E:COG0560	K02203	Phosphoserine phosphatase	Amino-acid biosynthesis; Hydrolase; Magnesium; Metal-binding; Serine biosynthesis.	Phosphoserine phosphatase that mediates dephosphorylation of phosphoserine in the serine biosynthesis pathway. Also able to dephosphorylate other substrates such as phospho-L(or D)-threonine, with lower activity. Shows phosphoserine:homoserine phosphotransferase activity by transferring the phosphoryl group to homoserine using phosphoserine as the phosphoryl group donor; Belongs to the thrH famil…
20	POG_GCA_000264555.1_00547	serB,PSPH,PCHLO6_RS02725	E:COG0560|E:COG3830	K01079	Phosphoserine phosphatase	Amino-acid biosynthesis; Hydrolase; Magnesium; Metal-binding; Serine biosynthesis.	Belongs to the SerB family; Contains 1 ACT domain.; KEGG: pae:PA4960 phosphoserine phosphatase
20	POG_GCA_000264555.1_00500	PCHLO6_RS02490	E:COG0591	K11928	Sodium/proline symporter	Amino-acid transport; Cell inner membrane; Cell membrane; Ion transport; Membrane; Sodium; Sodium transport; Symport; Transmembrane; Transmembrane helix; Transport.	Catalyzes the sodium-dependent uptake of extracellular L-proline. Belongs to the sodium:solute symporter (SSF) (TC 2.A.21) family.
20	POG_GCA_000264555.1_01647	,	E:COG0591	K03307	solute:Na+ symporter, SSS family
20	POG_GCA_000264555.1_04936	metE,PCHLO6_RS24420	E:COG0620	K00549	5-methyltetrahydropteroyltriglutamate--homocysteine S-methyltransferase	Amino-acid biosynthesis; Metal-binding; Methionine biosynthesis; Methyltransferase; Repeat; Transferase; Zinc.	Catalyzes the transfer of a methyl group from 5- methyltetrahydrofolate to homocysteine resulting in methionine formation; Belongs to the vitamin-B12 independent methionine synthase family.; KEGG: pae:PA1927 5-methyltetrahydropteroyltriglutamate--homocysteine methyltransferase
20	POG_GCA_000264555.1_03706	dapE,PCHLO6_RS18335	E:COG0624	K01439	Succinyl-diaminopimelate desuccinylase	Cytoplasm; Dipeptidase; Hydrolase; Metal-binding; Metalloprotease; Protease; Zinc.	Is a relatively unspecific dipeptidase cleaving a variety of dipeptides, notably those with an N-terminal beta-Ala or D-Ala residue, e.g. carnosine (beta-Ala-His). To a lesser extent, also shows aminopeptidase activity, since it is able to catalyze the removal of the N-terminal amino acid from a few distinct tripeptides; Belongs to the peptidase M20A family.; KEGG: ljf:FI9785_509 succinyl-diamino…
20	POG_GCA_000264555.1_02566	pydC,PCHLO6_RS12745	E:COG0624	K06016	Beta-ureidopropionase	Hydrolase.	Belongs to the peptidase M20 family.; KEGG: pfl:PFL_2550 beta-ureidopropionase / N-carbamoyl-L-amino-acid hydrolase
20	POG_GCA_000264555.1_01157	dapE,PCHLO6_RS05765	E:COG0624	K01439	Succinyl-diaminopimelate desuccinylase	Amino-acid biosynthesis; Cobalt; Diaminopimelate biosynthesis; Hydrolase; Lysine biosynthesis; Metal-binding; Zinc.	Catalyzes the hydrolysis of N-succinyl-L,L- diaminopimelic acid (SDAP), forming succinate and LL-2,6- diaminoheptanedioate (DAP), an intermediate involved in the bacterial biosynthesis of lysine and meso-diaminopimelic acid, an essential component of bacterial cell walls; Belongs to the peptidase M20A family. DapE subfamily.; KEGG: pfl:PFL_1165 succinyl-diaminopimelate desuccinylase
6	POG_GCA_000963835.1_02197	pydC,PCL1606_RS10870	E:COG0624	K06016	Beta-ureidopropionase	Hydrolase; Metal-binding; Purine metabolism; Zinc.	Involved in the anaerobic utilization of allantoin. Converts allantoate to (S)-ureidoglycolate and ammonia; Belongs to the peptidase M20 family.; KEGG: pcz:PCL1606_22180 beta-ureidopropionase / N-carbamoyl-L-amino-acid hydrolase
19	POG_GCA_000264555.1_02314	cpg,PCHLO6_RS11500	E:COG0624	K01295	Glutamate carboxypeptidase	Carboxypeptidase; Hydrolase; Metal-binding; Metalloprotease; Protease; Signal; Zinc.	Catalyzes the hydrolysis of reduced and non-reduced folates to pteroates and L-glutamate. This enzyme has a broad specificity. Belongs to the peptidase M20A family.; KEGG: pch:EY04_10255 glutamate carboxypeptidase
20	POG_GCA_000264555.1_04271	pydC,PCHLO6_RS21110	E:COG0624	K06016	Beta-ureidopropionase	Amino-acid biosynthesis; Hydrolase; Plasmid.	Converts N-carbamyl-L-amino acids to L-amino acids. Belongs to the peptidase M20 family.; KEGG: eas:Entas_2233 beta-ureidopropionase / N-carbamoyl-L-amino-acid hydrolase
20	POG_GCA_000264555.1_05936	argE,PCHLO6_RS29385	E:COG0624	K01438	Acetylornithine deacetylase	Amino-acid biosynthesis; Arginine biosynthesis; Cobalt; Cytoplasm; Hydrolase; Metal-binding; Zinc.	Belongs to the peptidase M20A family. ArgE subfamily.; KEGG: vsc:VSVS12_00425 acetylornithine deacetylase
20	POG_GCA_000264555.1_03427	argE,PCHLO6_RS16965	E:COG0624	K01438	Acetylornithine deacetylase	Amino-acid biosynthesis; Cobalt; Diaminopimelate biosynthesis; Hydrolase; Lysine biosynthesis; Metal-binding; Zinc.	Catalyzes the hydrolysis of N-succinyl-L,L- diaminopimelic acid (SDAP), forming succinate and LL-2,6- diaminoheptanedioate (DAP), an intermediate involved in the bacterial biosynthesis of lysine and meso-diaminopimelic acid, an essential component of bacterial cell walls; Belongs to the peptidase M20A family. DapE subfamily.; KEGG: pfn:HZ99_05095 acetylornithine deacetylase
20	POG_GCA_000264555.1_02223	metZ,PCHLO6_RS11065	E:COG0626	K10764	O-succinylhomoserine sulfhydrylase	Amino-acid biosynthesis; Methionine biosynthesis; Pyridoxal phosphate; Transferase.	Catalyzes the formation of L-homocysteine from O- succinyl-L-homoserine (OSHS) and hydrogen sulfide. Can not use the other activated form of L-homoserine, O-acetyl-L-homoserine, as a substrate; Belongs to the trans-sulfuration enzymes family.; KEGG: pae:PA3107 O-succinylhomoserine sulfhydrylase; Transferring alkyl or aryl groups, other than methyl groups
20	POG_GCA_000264555.1_01826	CTH,PCHLO6_RS09095	E:COG0626	K01758	Cystathionine gamma-lyase	Amino-acid biosynthesis; Cytoplasm; Lyase; Methionine biosynthesis; Pyridoxal phosphate.	Belongs to the trans-sulfuration enzymes family.; KEGG: pch:EY04_08220 cystathionine gamma-lyase
20	POG_GCA_000264555.1_03866	metH,MTR,PCHLO6_RS19120	E:COG0646|E:COG1410	K00548	Methionine synthase	Amino-acid biosynthesis; Cobalamin; Cobalt; Metal-binding; Methionine biosynthesis; Methyltransferase; Repeat; S-adenosyl-L-methionine; Transferase; Zinc.	Catalyzes the transfer of a methyl group from methyl- cobalamin to homocysteine, yielding enzyme-bound cob(I)alamin and methionine. Subsequently, remethylates the cofactor using methyltetrahydrofolate (By similarity); Belongs to the vitamin-B12 dependent methionine synthase family; Contains 1 AdoMet activation domain; Contains 1 B12-binding domain; Contains 1 B12-binding N-terminal domain; Contai…
19	POG_GCA_000264555.1_02507	puuB,ordL,PCHLO6_RS12460	E:COG0665	K09471	Probable oxidoreductase OrdL	NAD; Oxidoreductase.	KEGG: pfz:AV641_19795 gamma-glutamylputrescine oxidase; With oxygen as acceptor
20	POG_GCA_000264555.1_06117	dadA,PCHLO6_RS30270	E:COG0665	K00285	D-amino acid dehydrogenase (quinone)	FAD; Flavoprotein; Oxidoreductase.	Catalyzes the oxidative deamination of D-amino acids. Has very broad substrate specificit; all the D-amino acids tested can be used as the substrate except D-Glu and D-Gln. Participates in the utilization of several D-amino acids as the sole source of nitrogen, i.e. D-alanine, D-histidine, D-phenylalanine, D-serine, D-threonine, and D-valine; Belongs to the DadA oxidoreductase family.; KEGG: eco:…
20	POG_GCA_000264555.1_00594	puuB,ordL,PCHLO6_RS02955	E:COG0665	K09471	Gamma-glutamylputrescine oxidoreductase	NAD; Oxidoreductase.	Involved in the breakdown of putrescine via the oxidation of L-glutamylputrescine; Belongs to the gamma-glutamylputrescine oxidoreductase family.; KEGG: pstt:CH92_02110 gamma-glutamylputrescine oxidase; With oxygen as acceptor
19	POG_GCA_000264555.1_02605	hcnC,PCHLO6_RS12930	E:COG0665	K10816	Glycine dehydrogenase (cyanide-forming)	Cell membrane; Flavoprotein; Lipoprotein; Membrane; Oxidoreductase; Palmitate; Signal; Transmembrane; Transmembrane helix.	A three-component membrane-bound flavoenzyme that catalyzes the formation of hydrogen cyanide, a secondary metabolite, by transfer of electrons to a cyanide-resistant branch of the aerobic respiratory chain; Belongs to the FAD-dependent glycerol-3-phosphate dehydrogenase family.; KEGG: pfo:Pfl01_3514 hydrogen cyanide synthase HcnC
20	POG_GCA_000264555.1_05812	dadA,PCHLO6_RS28765	E:COG0665	K00285	D-amino acid dehydrogenase (quinone)	FAD; Flavoprotein; Oxidoreductase.	Oxidative deamination of D-amino acids; Belongs to the DadA oxidoreductase family.; KEGG: pae:PA5084 D-amino-acid dehydrogenase
19	POG_GCA_000264555.1_01449	lhpB,PCHLO6_RS07225	E:COG0665	K21061	Hydrogen cyanide synthase subunit HcnC	Cell membrane; Flavoprotein; Lipoprotein; Membrane; Oxidoreductase; Palmitate; Signal; Transmembrane; Transmembrane helix.	A three-component membrane-bound flavoenzyme that catalyzes the formation of hydrogen cyanide, a secondary metabolite, by transfer of electrons to a cyanide-resistant branch of the aerobic respiratory chain; Belongs to the FAD-dependent glycerol-3-phosphate dehydrogenase family.; KEGG: pch:EY04_06340 D-hydroxyproline dehydrogenase subunit beta; With other acceptors
20	POG_GCA_000264555.1_05356	thiO,PCHLO6_RS26505	E:COG0665	K03153	Glycine oxidase	Cytoplasm; FAD; Flavoprotein; Herbicide resistance; Oxidoreductase; Thiamine biosynthesis.	Catalyzes the FAD-dependent oxidative deamination of various amines and D-amino acids to yield the corresponding alpha- keto acids, ammonia/amine, and hydrogen peroxide. Oxidizes sarcosine (N-methylglycine), N-ethylglycine and glycine. Can also oxidize the herbicide glyphosate (N-phosphonomethylglycine). Displays lower activities on D-alanine, D-valine, D-proline and D- methionine. Does not act o…
20	POG_GCA_000264555.1_00632	PCHLO6_RS03145	E:COG0683	K11959	Aliphatic amidase expression-regulating protein	Kinase; Repressor; Transferase.
20	POG_GCA_000264555.1_00595	PCHLO6_RS02960	E:COG0683	K01999	Leu/Ile/Val-binding protein homolog 1	Amino-acid transport; Signal; Transport.	Component of an amino-acid transport system; Belongs to the leucine-binding protein family.
20	POG_GCA_000264555.1_01373	PCHLO6_RS06845	E:COG0683	K01999	Leucine-, isoleucine-, valine-, threonine-, and alanine-binding protein	Amino-acid transport; Disulfide bond; Periplasm; Signal; Transport.	Component of the high-affinity leucine, isoleucine, valine transport system I (LIV-I), which is operative without Na(+) and is specific for alanine and threonine, in addition to branched-chain amino acids; Belongs to the leucine-binding protein family.
20	POG_GCA_000264555.1_05802	metF,MTHFR,PCHLO6_RS28715	E:COG0685	K00297	Methylenetetrahydrofolate reductase (NAD(P)H)	Amino-acid biosynthesis; FAD; Flavoprotein; Methionine biosynthesis; NAD; NADP; Oxidoreductase.	Belongs to the methylenetetrahydrofolate reductase family.; KEGG: pmy:Pmen_0448 methylenetetrahydrofolate reductase (NADPH)
7	POG_GCA_000963835.1_05181	PCL1606_RS25645	E:COG0687	K11073	Putrescine-binding periplasmic protein SpuD	Disulfide bond; Periplasm; Secreted; Signal; Transport.	Putrescine-binding protein probably required for putrescine uptake into cells. Binds putrescine with high affinity, spermidine with relatively low affinity. Does not bind cadaverine or spermine. Putrescine binding induces large inter-domain conformational changes; Belongs to the bacterial solute-binding protein PotD/PotF family.
20	POG_GCA_000264555.1_00797	PCHLO6_RS03945	E:COG0687	K11073	Spermidine-binding periplasmic protein SpuE	Periplasm; Signal; Transport; Virulence.	Spermidine-binding protein probably required for its uptake into cells. Binds spermidine with high affinity (KD=14.3 nM). Does not bind putrescine, cadaverine or spermine. Spermidine binding induces large inter-domain conformational changes. Implicated in induction of type 3 secretion systems (T3SS), which play a role in virulence; Belongs to the bacterial solute-binding protein PotD/PotF family.
20	POG_GCA_000264555.1_02421	PCHLO6_RS12030	E:COG0687	K11073	Spermidine/putrescine-binding periplasmic protein 2	Periplasm; Signal; Transport.	Required for the activity of the bacterial periplasmic transport system of putrescine and spermidine. Polyamine binding protein (By similarity); Belongs to the bacterial solute-binding protein PotD/PotF family.
20	POG_GCA_000264555.1_03325	PCHLO6_RS16460	E:COG0687	K11073	Spermidine/putrescine-binding periplasmic protein 2	Periplasm; Signal; Transport.	Required for the activity of the bacterial periplasmic transport system of putrescine and spermidine. Polyamine binding protein (By similarity); Belongs to the bacterial solute-binding protein PotD/PotF family.
20	POG_GCA_000264555.1_05919	PCHLO6_RS29305	E:COG0687	K11073	Putrescine-binding periplasmic protein	Disulfide bond; Periplasm; Signal; Transport.	Required for the activity of the bacterial periplasmic transport system of putrescine. Polyamine binding protein; Belongs to the bacterial solute-binding protein PotD/PotF family.
19	POG_GCA_000264555.1_05653	PCHLO6_RS27970	E:COG0687	K02055	putative spermidine/putrescine transport system substrate-binding protein
20	POG_GCA_000264555.1_00457	aroK,aroL,PCHLO6_RS02275	E:COG0703	K00891	Shikimate kinase	Amino-acid biosynthesis; Aromatic amino acid biosynthesis; ATP-binding; Cytoplasm; Kinase; Magnesium; Metal-binding; Nucleotide-binding; Transferase.	Catalyzes the specific phosphorylation of the 3-hydroxyl group of shikimic acid using ATP as a cosubstrate; Belongs to the shikimate kinase family.; KEGG: eco:b3390 shikimate kinase
20	POG_GCA_000264555.1_02349	selD,SEPHS,PCHLO6_RS11670	E:COG0709	K01008	Selenide, water dikinase	ATP-binding; Kinase; Magnesium; Nucleotide-binding; Selenium; Transferase.	Synthesizes selenophosphate from selenide and ATP; Belongs to the selenophosphate synthase 1 family. Class I subfamily.; KEGG: psts:E05_15770 selenide, water dikinase
20	POG_GCA_000264555.1_03815	aroF,aroG,aroH,PCHLO6_RS18880	E:COG0722	K01626	3-deoxy-7-phosphoheptulonate synthase	Amino-acid biosynthesis; Aromatic amino acid biosynthesis; Cytoplasm; Nucleus; Stress response; Transferase.	Stereospecific condensation of phosphoenolpyruvate (PEP) and D-erythrose-4-phosphate (E4P) giving rise to 3-deoxy-D- arabino-heptulosonate-7-phosphate (DAHP); Belongs to the class-I DAHP synthase family.; KEGG: pfl:PFL_3568 3-deoxy-7-phosphoheptulonate synthase
20	POG_GCA_000264555.1_04393	aroF,aroG,aroH,PCHLO6_RS21725	E:COG0722	K01626	3-deoxy-7-phosphoheptulonate synthase	Amino-acid biosynthesis; Aromatic amino acid biosynthesis; Transferase.	Stereospecific condensation of phosphoenolpyruvate (PEP) and D-erythrose-4-phosphate (E4P) giving rise to 3-deoxy-D- arabino-heptulosonate-7-phosphate (DAHP). Belongs to the class-I DAHP synthase family.; KEGG: pmy:Pmen_2552 3-deoxy-7-phosphoheptulonate synthase
19	POG_GCA_000264555.1_00883	PCHLO6_RS04395	E:COG0747	K12368	Periplasmic dipeptide transport protein	Chemotaxis; Disulfide bond; Peptide transport; Periplasm; Protein transport; Signal; Transport.	Dipeptide-binding protein of a transport system that can be subject to osmotic shock. DppA is also required for peptide chemotaxis. Belongs to the bacterial solute-binding protein 5 family.
20	POG_GCA_000264555.1_00882	PCHLO6_RS04390	E:COG0747	K12368	Periplasmic dipeptide transport protein	Chemotaxis; Disulfide bond; Peptide transport; Periplasm; Protein transport; Signal; Transport.	Dipeptide-binding protein of a transport system that can be subject to osmotic shock. DppA is also required for peptide chemotaxis. Belongs to the bacterial solute-binding protein 5 family.
20	POG_GCA_000264555.1_00880	PCHLO6_RS04380	E:COG0747	K12368	Periplasmic dipeptide transport protein	Chemotaxis; Disulfide bond; Peptide transport; Periplasm; Protein transport; Signal; Transport.	Dipeptide-binding protein of a transport system that can be subject to osmotic shock. DppA is also required for peptide chemotaxis. Belongs to the bacterial solute-binding protein 5 family.
20	POG_GCA_000264555.1_06129	PCHLO6_RS30330	E:COG0747	K02035	Periplasmic dipeptide transport protein	Chemotaxis; Disulfide bond; Peptide transport; Periplasm; Protein transport; Signal; Transport.	Dipeptide-binding protein of a transport system that can be subject to osmotic shock. DppA is also required for peptide chemotaxis. Belongs to the bacterial solute-binding protein 5 family.
20	POG_GCA_000264555.1_02833	TRYS,PCHLO6_RS14055	E:COG0754	K01833	Putative acid--amine ligase YjfC	ATP-binding; Ligase; Magnesium; Metal-binding; Nucleotide-binding.	May be a ligase forming an amide bond. Shows ATPase activity. Despite its similarity to the C-terminal synthetase domain of Gss, is not a glutathionylspermidine (Gsp) synthetase. Cannot synthesize Gsp, glutathione (GSH), or GSH intermediates, from GSH and spermidine, cysteine and glutamate, gamma- glutamylcysteine and spermidine, and gamma-glutamylcysteine and glycine. Does not bind to Gsp; Belon…
20	POG_GCA_000264555.1_00662	aroQ,qutE,PCHLO6_RS03295	E:COG0757	K03786	3-dehydroquinate dehydratase	Amino-acid biosynthesis; Aromatic amino acid biosynthesis; Lyase.	Catalyzes a trans-dehydration via an enolate intermediate; Belongs to the type-II 3-dehydroquinase family.; KEGG: lum:CNR27_04885 3-dehydroquinate dehydratase II
19	POG_GCA_000264555.1_05418	aroQ,qutE,PCHLO6_RS26810	E:COG0757	K03786	3-dehydroquinate dehydratase	Amino-acid biosynthesis; Aromatic amino acid biosynthesis; Lyase.	Catalyzes a trans-dehydration via an enolate intermediate; Belongs to the type-II 3-dehydroquinase family.; KEGG: ppu:PP_2407 3-dehydroquinate dehydratase II
19	POG_GCA_000264555.1_01045	PCHLO6_RS05205	E:COG0765	K09971	Inner membrane amino-acid ABC transporter permease protein YhdY	Amino-acid transport; Cell inner membrane; Cell membrane; Membrane; Transmembrane; Transmembrane helix; Transport.	Probably part of the binding-protein-dependent transport system YdhWXYZ for an amino aci; probably responsible for the translocation of the substrate across the membrane. Belongs to the binding-protein-dependent transport system permease family. HisMQ subfamily; Contains 1 ABC transmembrane type-1 domain.
20	POG_GCA_000264555.1_04918	PCHLO6_RS24330	E:COG0765	K10003	Glutamate/aspartate transport system permease protein GltJ	Amino-acid transport; Cell inner membrane; Cell membrane; Membrane; Transmembrane; Transmembrane helix; Transport.	Part of the binding-protein-dependent transport system for aspartate/glutamat; probably responsible for the translocation of the substrate across the membrane; Belongs to the binding-protein-dependent transport system permease family. HisMQ subfamily; Contains 1 ABC transmembrane type-1 domain.
20	POG_GCA_000264555.1_00267	,	E:COG0765	K10009	L-cystine transport system permease protein YecS	Amino-acid transport; Cell inner membrane; Cell membrane; Membrane; Transmembrane; Transmembrane helix; Transport.	Part of the ABC transporter complex FliY-YecC-YecS involved in L-cystine transport. Probably responsible for the translocation of the substrate across the membrane; Belongs to the binding-protein-dependent transport system permease family. HisMQ subfamily; Contains 1 ABC transmembrane type-1 domain.
20	POG_GCA_000264555.1_04645	PCHLO6_RS22980	E:COG0765	K10037	L-cystine transport system permease protein TcyL	Amino-acid transport; Cell membrane; Membrane; Transmembrane; Transmembrane helix; Transport.	Part of the ABC transporter complex TcyJKLMN involved in L-cystine import. Probably responsible for the translocation of the substrate across the membrane (Probable). Is also involved in cystathionine, djenkolate, and S-methylcysteine transport; Belongs to the binding-protein-dependent transport system permease family; Contains 1 ABC transmembrane type-1 domain.
20	POG_GCA_000264555.1_04919	PCHLO6_RS24335	E:COG0765	K10002	Glutamate/aspartate transport system permease protein GltK	Amino-acid transport; Cell inner membrane; Cell membrane; Membrane; Transmembrane; Transmembrane helix; Transport.	Part of the binding-protein-dependent transport system for aspartate/glutamat; probably responsible for the translocation of the substrate across the membrane; Belongs to the binding-protein-dependent transport system permease family. HisMQ subfamily; Contains 1 ABC transmembrane type-1 domain.
19	POG_GCA_000264555.1_05974	PCHLO6_RS29570	E:COG0765	K02029	Histidine transport system permease protein HisQ	Amino-acid transport; Cell inner membrane; Cell membrane; Membrane; Transmembrane; Transmembrane helix; Transport.	Part of the histidine permease ABC transporter. Also part of a lysine/arginine/ornithine transporter. Probably responsible for the translocation of the substrate across the membrane. Required to relay the ATPase-inducing signal from the solute-binding protein to HisP (By similarity); Belongs to the binding-protein-dependent transport system permease family. HisMQ subfamily; Contains 1 ABC transme…
20	POG_GCA_000264555.1_00251	PCHLO6_RS01255	E:COG0765	K16962	Glutamine transport system permease protein GlnP	Amino-acid transport; Cell inner membrane; Cell membrane; Membrane; Transmembrane; Transmembrane helix; Transport.	Part of the binding-protein-dependent transport system for glutamin; probably responsible for the translocation of the substrate across the membrane; Belongs to the binding-protein-dependent transport system permease family. HisMQ subfamily; Contains 1 ABC transmembrane type-1 domain.
20	POG_GCA_000264555.1_00252	PCHLO6_RS01260	E:COG0765	K02029	Probable amino-acid ABC transporter permease protein PatM	Amino-acid transport; Cell inner membrane; Cell membrane; Membrane; Transmembrane; Transmembrane helix; Transport.	Probably part of a binding-protein-dependent transport system for an amino acid. Probably responsible for the translocation of the substrate across the membrane. Belongs to the binding-protein-dependent transport system permease family. HisMQ subfamily; Contains 1 ABC transmembrane type-1 domain.
19	POG_GCA_000264555.1_05975	PCHLO6_RS29575	E:COG0765	K02029	Probable amino-acid ABC transporter permease protein YckA	Amino-acid transport; Cell membrane; Membrane; Transmembrane; Transmembrane helix; Transport.	Part of a binding-protein-dependent transport system. Probably responsible for the translocation of the substrate across the membrane (By similarity); Belongs to the binding-protein-dependent transport system permease family. HisMQ subfamily; Contains 1 ABC transmembrane type-1 domain.
20	POG_GCA_000264555.1_00622	ureC,PCHLO6_RS03095	E:COG0804	K01428	Urease	Cytoplasm; Hydrolase; Metal-binding; Nickel.	Belongs to the urease family; Contains 1 urease domain.; KEGG: vhr:AL538_19195 urease subunit alpha
19	POG_GCA_000264555.1_00986	PCHLO6_RS04910	E:COG0814	K03837	Serine transporter	Cell inner membrane; Cell membrane; Membrane; Transmembrane; Transmembrane helix; Transport.	Involved in the import of serine into the cell. May be required for phage C1 adsorption by interacting with DrcB. May also be involved in ampicillin sensitivity (By similarity); Belongs to the amino acid/polyamine transporter 2 family. SdaC/TdcC subfamily.
20	POG_GCA_000264555.1_02666	PCHLO6_RS13225	E:COG0814	K03837	Serine transporter	Cell inner membrane; Cell membrane; Membrane; Transmembrane; Transmembrane helix; Transport.	Involved in the import of serine into the cell. May be required for phage C1 adsorption by interacting with DrcB. May also be involved in ampicillin sensitivity (By similarity); Belongs to the amino acid/polyamine transporter 2 family. SdaC/TdcC subfamily.
20	POG_GCA_000264555.1_00626	ureA,PCHLO6_RS03115	E:COG0831	K01430	Urease	Cytoplasm; Hydrolase.	In the N-terminal sectio; belongs to the urease gamma subunit family; In the C-terminal sectio; belongs to the urease beta subunit family.; KEGG: ece:Z1143 urease subunit gamma
20	POG_GCA_000264555.1_00623	ureB,PCHLO6_RS03100	E:COG0832	K01429	Urease	Cytoplasm; Hydrolase.	Belongs to the urease beta subunit family.; KEGG: ent:Ent638_3465 urease subunit beta
19	POG_GCA_000264555.1_01043	PCHLO6_RS05195	E:COG0834	K09969	Putative amino-acid ABC transporter-binding protein YhdW	Amino-acid transport; Periplasm; Signal; Transport.	Probably part of the binding-protein-dependent transport system YdhWXYZ for an amino acid. Belongs to the bacterial solute-binding protein 3 family.
20	POG_GCA_000264555.1_04917	PCHLO6_RS24325	E:COG0834	K10001	Glutamate/aspartate periplasmic-binding protein	Amino-acid transport; Periplasm; Signal; Transport.	Part of the binding-protein-dependent transport system for glutamate and aspartate. Binds to both aspartate and glutamate. Belongs to the bacterial solute-binding protein 3 family.
20	POG_GCA_000264555.1_05810	PCHLO6_RS28755	E:COG0834	K10001	Glutamine-binding protein	Amino-acid transport; Cell membrane; Lipoprotein; Membrane; Palmitate; Signal; Transport.	Involved in glutamine-transport system. Interacts with the glutamine-transport system GlnPQ. Belongs to the bacterial solute-binding protein 3 family.
20	POG_GCA_000264555.1_00254	PCHLO6_RS01270	E:COG0834	K02030	ABC transporter glutamine-binding protein GlnH	Amino-acid transport; Cell membrane; Lipoprotein; Membrane; Palmitate; Signal; Transport.	Part of the ABC transporter complex GlnHMPQ involved in glutamine transport; Belongs to the bacterial solute-binding protein 3 family.
13	POG_GCA_000264555.1_03165	PCHLO6_RS15670	E:COG0834	K02030	polar amino acid transport system substrate-binding protein
20	POG_GCA_000264555.1_00268	PCHLO6_RS01340	E:COG0834	K02424	L-cystine-binding protein FliY	Amino-acid transport; Periplasm; Signal; Transport.	Part of the ABC transporter complex FliY-YecC-YecS involved in L-cystine transport. Binds cystine; Belongs to the bacterial solute-binding protein 3 family.
19	POG_GCA_000264555.1_05973	PCHLO6_RS29565	E:COG0834	K02030	ABC transporter arginine-binding protein 1	Amino-acid transport; Periplasm; Signal; Transport.	Part of the ABC transporter complex ArtPIQMJ involved in arginine transport. Binds L-arginine with high affinity; Belongs to the bacterial solute-binding protein 3 family.
20	POG_GCA_000264555.1_01570	pheC,PCHLO6_RS07820	E:COG0834	K01713	Prephenate dehydratase	Amino-acid biosynthesis; Aromatic amino acid biosynthesis; Lyase; Multifunctional enzyme; Periplasm; Phenylalanine biosynthesis; Signal.	Forms alternative pathway for phenylalanine biosynthesis. Can catalyze two reactions: prephenate dehydratase and arogenate dehydratase. May have a role in chemotaxis or transport. Belongs to the bacterial solute-binding protein 3 family.; KEGG: pch:EY04_06910 cyclohexadienyl dehydratase
19	POG_GCA_000264555.1_02327	PCHLO6_RS11565	E:COG0834	K10022	Octopine-binding periplasmic protein	Disulfide bond; Periplasm; Plasmid; Signal; Transport.	Component of the octopine active transport system probably consisting of four subunits: Q, M, P and T; Belongs to the bacterial solute-binding protein 3 family.
20	POG_GCA_000264555.1_04647	PCHLO6_RS22990	E:COG0834	K02030	Putative ABC transporter arginine-binding protein 2	Amino-acid transport; Periplasm; Signal; Transport.	Part of the ABC transporter complex ArtPIQMJ involved in arginine transport; Belongs to the bacterial solute-binding protein 3 family.
20	POG_GCA_000264555.1_01037	PCHLO6_RS05165	E:COG0834	K10022	Arginine-binding periplasmic protein	Amino-acid transport; Periplasm; Signal; Transport.	Binds arginin; part of the arginine periplasmic transport system. Belongs to the bacterial solute-binding protein 3 family.
20	POG_GCA_000264555.1_05909	PCHLO6_RS29255	E:COG0834	K02424	Probable amino-acid-binding protein YxeM	Amino-acid transport; Cell membrane; Lipoprotein; Membrane; Palmitate; Signal; Transport.	Probably part of the ABC transporter complex YxeMNO that could be involved in amino-acid import. May transport S- methylcysteine. Belongs to the bacterial solute-binding protein 3 family.
20	POG_GCA_000264555.1_00368	PCHLO6_RS01835	E:COG0834	K02030	polar amino acid transport system substrate-binding protein
20	POG_GCA_000264555.1_05679	evgS,bvgS,PCHLO6_RS28100	E:COG0834|T:COG2202|T:COG2200|T:COG2199	K07679	Histidine kinase	ATP-binding; Cell inner membrane; Cell membrane; Kinase; Membrane; Nucleotide-binding; Phosphoprotein; Signal; Transferase; Transmembrane; Transmembrane helix; Two-component regulatory system; Virulence.	Member of the two-component regulatory system BvgS/BvgA. Phosphorylates BvgA via a four-step phosphorelay in response to environmental signals (By similarity); Contains 1 histidine kinase domain; Contains 1 HPt domain; Contains 1 PAC (PAS-associated C-terminal) domain; Contains 1 PAS (PER-ARNT-SIM) domain; Contains 1 response regulatory domain.; KEGG: kmi:VW41_09910 two-component system, NarL fam…
19	POG_GCA_000264555.1_05656	PCHLO6_RS27985	E:COG0834|T:COG4585	K01768	Adenylate cyclase	ATP-binding; Cell inner membrane; Cell membrane; Kinase; Membrane; Nitrate assimilation; Nucleotide-binding; Phosphoprotein; Transferase; Transmembrane; Transmembrane helix; Two-component regulatory system.	Acts as a sensor for nitrate/nitrite and transduces signal of nitrate availability to the NarL protein and of both nitrate/nitrite to the NarP protein. NarX probably activates NarL and NarP by phosphorylation in the presence of nitrate. NarX also plays a negative role in controlling NarL activity, probably through dephosphorylation in the absence of nitrate (By similarity); Contains 1 HAMP domain…
19	POG_GCA_000264555.1_05943	GLDC,gcvP,PCHLO6_RS29420	E:COG1003|E:COG0403	K00281	Glycine dehydrogenase (aminomethyl-transferring)	Oxidoreductase; Pyridoxal phosphate.	The glycine cleavage system catalyzes the degradation of glycine. The P protein binds the alpha-amino group of glycine through its pyridoxal phosphate cofacto; CO(2) is released and the remaining methylamine moiety is then transferred to the lipoamide cofactor of the H protein; Belongs to the GcvP family.; KEGG: pre:PCA10_54350 glycine dehydrogenase
20	POG_GCA_000264555.1_04757	GLDC,gcvP,PCHLO6_RS23525	E:COG1003|E:COG0403	K00281	Glycine dehydrogenase (aminomethyl-transferring)	Oxidoreductase; Pyridoxal phosphate.	The glycine cleavage system catalyzes the degradation of glycine. The P protein binds the alpha-amino group of glycine through its pyridoxal phosphate cofacto; CO(2) is released and the remaining methylamine moiety is then transferred to the lipoamide cofactor of the H protein; Belongs to the GcvP family.; KEGG: pman:OU5_4892 glycine dehydrogenase
20	POG_GCA_000264555.1_06202	aspA,PCHLO6_RS30700	E:COG1027	K01744	Aspartate ammonia-lyase	Lyase.	Belongs to the class-II fumarase/aspartase family. Aspartase subfamily.; KEGG: pre:PCA10_55860 aspartate ammonia-lyase
20	POG_GCA_000264555.1_00270	cysE,PCHLO6_RS01350	E:COG1045	K00640	Serine O-acetyltransferase	Acyltransferase; Amino-acid biosynthesis; Cysteine biosynthesis; Cytoplasm; Plasmid; Repeat; Transferase.	Belongs to the transferase hexapeptide repeat family.; KEGG: pfl:PFL_0250 serine O-acetyltransferase
20	POG_GCA_000264555.1_05007	cysE,PCHLO6_RS24775	E:COG1045	K00640	Serine O-acetyltransferase	Acyltransferase; Amino-acid biosynthesis; Cysteine biosynthesis; Cytoplasm; Repeat; Transferase.	Catalyzes the acetylation of serine by acetyl-CoA to produce O-acetylserine (OAS); Belongs to the transferase hexapeptide repeat family.; KEGG: pae:PA3816 serine O-acetyltransferase
20	POG_GCA_000264555.1_05731	fdhA,PCHLO6_RS28360	E:COG1063	K00148	Formaldehyde dehydrogenase	Metal-binding; NAD; Oxidoreductase; Zinc.	Catalyzes the oxidation of long-chain alcohols but is inactive against ethanol; Belongs to the zinc-containing alcohol dehydrogenase family.; KEGG: pae:PA5421 glutathione-independent formaldehyde dehydrogenase
20	POG_GCA_000264555.1_03490	BDH,butB,PCHLO6_RS17275	E:COG1063	K00004	Sorbitol dehydrogenase	Acetylation; Cell projection; Cilium; Flagellum; Membrane; Metal-binding; Mitochondrion; NAD; Oxidoreductase; Zinc.	Converts sorbitol to fructose; Belongs to the zinc-containing alcohol dehydrogenase family.; KEGG: pae:PA4097 (R,R)-butanediol dehydrogenase / meso-butanediol dehydrogenase / diacetyl reductase
20	POG_GCA_000264555.1_05005	iscS,NFS1,PCHLO6_RS24765	E:COG1104	K04487	Cysteine desulfurase	2Fe-2S; Cytoplasm; Iron; Iron-sulfur; Metal-binding; Pyridoxal phosphate; Transferase.	Master enzyme that delivers sulfur to a number of partners involved in Fe-S cluster assembly, tRNA modification or cofactor biosynthesis. Catalyzes the removal of elemental sulfur atoms from cysteine to produce alanine. Functions as a sulfur delivery protein for Fe-S cluster synthesis onto IscU, an Fe-S scaffold assembly protein, as well as other S acceptor proteins; Belongs to the class-V pyrido…
20	POG_GCA_000264555.1_04292	iscS,NFS1,PCHLO6_RS21215	E:COG1104	K04487	Cysteine desulfurase	2Fe-2S; Cytoplasm; Iron; Iron-sulfur; Metal-binding; Pyridoxal phosphate; Transferase.	Master enzyme that delivers sulfur to a number of partners involved in Fe-S cluster assembly, tRNA modification or cofactor biosynthesis. Catalyzes the removal of elemental sulfur atoms from cysteine to produce alanine. Functions as a sulfur delivery protein for Fe-S cluster synthesis onto IscU, an Fe-S scaffold assembly protein, as well as other S acceptor proteins; Belongs to the class-V pyrido…
20	POG_GCA_000264555.1_05006	PCHLO6_RS24770	E:COG1104|K:COG1959	K13643	HTH-type transcriptional regulator IscR	2Fe-2S; Activator; DNA-binding; Iron; Iron-sulfur; Metal-binding; Repressor; Transcription; Transcription regulation.	Regulates the transcription of several operons and genes involved in the biogenesis of Fe-S clusters and Fe-S-containing proteins; Contains 1 HTH rrf2-type DNA-binding domain.
20	POG_GCA_000264555.1_01688	PCHLO6_RS08415	E:COG1113	K11734	Lysine/arginine permease	Amino-acid transport; Membrane; Transmembrane; Transmembrane helix; Transport.	High-affinity permease for arginine and lysine. Belongs to the amino acid-polyamine-organocation (APC) superfamily. YAT (TC 2.A.3.10) family.
20	POG_GCA_000264555.1_04951	PCHLO6_RS24495	E:COG1113	K03293	D-serine/D-alanine/glycine transporter	Amino-acid transport; Cell inner membrane; Cell membrane; Membrane; Transmembrane; Transmembrane helix; Transport.	Permease that is involved in the transport across the cytoplasmic membrane of D-alanine, D-serine and glycine; Belongs to the amino acid-polyamine-organocation (APC) superfamily. Amino acid transporter (AAT) (TC 2.A.3.1) family.
20	POG_GCA_000264555.1_00415	PCHLO6_RS02065	E:COG1113	K11733	D-serine/D-alanine/glycine transporter	Amino-acid transport; Cell inner membrane; Cell membrane; Membrane; Transmembrane; Transmembrane helix; Transport.	Permease that is involved in the transport across the cytoplasmic membrane of D-alanine, D-serine and glycine; Belongs to the amino acid-polyamine-organocation (APC) superfamily. Amino acid transporter (AAT) (TC 2.A.3.1) family.
20	POG_GCA_000264555.1_00764	PCHLO6_RS03785	E:COG1113	K03293	GABA permease	Amino-acid transport; Cell membrane; Membrane; Transmembrane; Transmembrane helix; Transport.	High-affinity uptake system for GABA. Functions also as a low-affinity proline importer; Belongs to the amino acid-polyamine-organocation (APC) superfamily. Amino acid transporter (AAT) (TC 2.A.3.1) family.
20	POG_GCA_000264555.1_00353	PCHLO6_RS01760	E:COG1113	K11735	Uncharacterized transporter YdgF	Amino-acid transport; Cell membrane; Membrane; Transmembrane; Transmembrane helix; Transport.	Probable amino-acid or metabolite transport protein. Belongs to the amino acid-polyamine-organocation (APC) superfamily.
20	POG_GCA_000264555.1_00757	PCHLO6_RS03750	E:COG1113	K11734	Lysine/arginine permease	Amino-acid transport; Membrane; Transmembrane; Transmembrane helix; Transport.	High-affinity permease for arginine and lysine. Belongs to the amino acid-polyamine-organocation (APC) superfamily. YAT (TC 2.A.3.10) family.
20	POG_GCA_000264555.1_01818	PCHLO6_RS09055	E:COG1114	K03311	Branched-chain amino acid transport system 2 carrier protein	Amino-acid transport; Cell inner membrane; Cell membrane; Membrane; Transmembrane; Transmembrane helix; Transport.	Component of the LIV-II transport system for branched- chain amino acids. BraB is specific for isoleucine, leucine and valine. The LIV-II transport system is coupled to sodium and lithium ions. Belongs to the branched chain amino acid transporter family.
20	POG_GCA_000264555.1_06204	PCHLO6_RS30710	E:COG1115	K03310	Uncharacterized transporter YaaJ	Cell inner membrane; Cell membrane; Membrane; Symport; Transmembrane; Transmembrane helix; Transport.	Belongs to the sodium:alanine (SAF) symporter family.
20	POG_GCA_000264555.1_01369	PCHLO6_RS06825	E:COG1125	K05847	High-affinity branched-chain amino acid transport ATP-binding protein BraG	Amino-acid transport; ATP-binding; Cell inner membrane; Cell membrane; Membrane; Nucleotide-binding; Transport.	Component of the high affinity leucine, isoleucine, valine, transport system (LIV-I), which is operative without Na(+) and is specific for alanine and threonine, in addition to branched-chain amino acids. Belongs to the ABC transporter superfamily; Contains 1 ABC transporter domain.
20	POG_GCA_000264555.1_05860	PCHLO6_RS29010	E:COG1125	K09812	Phosphonates import ATP-binding protein PhnC 1	ATP-binding; Cell inner membrane; Cell membrane; Hydrolase; Membrane; Nucleotide-binding; Phosphonate transport; Transport.	Part of the ABC transporter complex PhnCDE involved in phosphonates import. Responsible for energy coupling to the transport system; Belongs to the ABC transporter superfamily. Phosphonates importer (TC 3.A.1.9.1) family; Contains 1 ABC transporter domain.
20	POG_GCA_000264555.1_00253	ABC.PA.A,PCHLO6_RS01265	E:COG1126	K02028	Polar-amino-acid-transporting ATPase	Amino-acid transport; ATP-binding; Cell membrane; Membrane; Nucleotide-binding; Transport.	Part of the binding-protein-dependent transport system for glutamate. Probably responsible for energy coupling to the transport system. Belongs to the ABC transporter superfamily; Contains 1 ABC transporter domain.; KEGG: ppg:PputGB1_5219 polar amino acid transport system ATP-binding protein
20	POG_GCA_000264555.1_01046	aapP,bztD,PCHLO6_RS05210	E:COG1126	K09972	Phosphate import ATP-binding protein PstB	ATP-binding; Cell membrane; Hydrolase; Membrane; Nucleotide-binding; Phosphate transport; Transport.	Part of the ABC transporter complex PstSACB involved in phosphate import. Responsible for energy coupling to the transport system; Belongs to the ABC transporter superfamily. Phosphate importer (TC 3.A.1.7) family; Contains 1 ABC transporter domain.; KEGG: pfo:Pfl01_0976 general L-amino acid transport system ATP-binding protein; Acting on acid anhydrides; catalyzing transmembrane movement of subs…
19	POG_GCA_000264555.1_02355	PCHLO6_RS11700	E:COG1126	K09013	Probable ATP-dependent transporter ycf16	ATP-binding; Chloroplast; Nucleotide-binding; Plastid; Transport.	Belongs to the ABC transporter superfamily. Ycf16 family; Contains 1 ABC transporter domain.
19	POG_GCA_000264555.1_05976	ABC.PA.A,PCHLO6_RS29580	E:COG1126	K02028	Polar-amino-acid-transporting ATPase	ATP-binding; Cell membrane; Hydrolase; Membrane; Nucleotide-binding; Phosphonate transport; Transport.	Part of the ABC transporter complex PhnCDE involved in phosphonates import. Responsible for energy coupling to the transport system; Belongs to the ABC transporter superfamily. Phosphonates importer (TC 3.A.1.9.1) family; Contains 1 ABC transporter domain.; KEGG: ppw:PputW619_1919 polar amino acid transport system ATP-binding protein
15	POG_GCA_000264555.1_03371	ssuB,PCHLO6_RS16690	E:COG1126	K15555	Aliphatic sulfonates import ATP-binding protein SsuB 2	ATP-binding; Cell inner membrane; Cell membrane; Hydrolase; Membrane; Nucleotide-binding; Plasmid; Transport.	Part of the ABC transporter complex SsuABC involved in aliphatic sulfonates import. Responsible for energy coupling to the transport system; Belongs to the ABC transporter superfamily. Aliphatic sulfonates importer (TC 3.A.1.17.2) family; Contains 1 ABC transporter domain.; KEGG: pch:EY04_15995 sulfonate transport system ATP-binding protein; Acting on acid anhydrides; catalyzing transmembrane mov…
20	POG_GCA_000264555.1_05900	ilvA,tdcB,PCHLO6_RS29210	E:COG1171	K01754	Threonine ammonia-lyase	Amino-acid biosynthesis; Branched-chain amino acid biosynthesis; Isoleucine biosynthesis; Lyase; Pyridoxal phosphate; Repeat.	Catalyzes the anaerobic formation of alpha-ketobutyrate and ammonia from threonine in a two-step reaction. The first step involved a dehydration of threonine and a production of enamine intermediates (aminocrotonate), which tautomerizes to its imine form (iminobutyrate). Both intermediates are unstable and short- lived. The second step is the nonenzymatic hydrolysis of the enamine/imine intermedi…
19	POG_GCA_000264555.1_03080	ilvA,tdcB	E:COG1171	K01754	Threonine ammonia-lyase	Allosteric enzyme; Amino-acid biosynthesis; Branched-chain amino acid biosynthesis; Chloroplast; Isoleucine biosynthesis; Lyase; Plastid; Pyridoxal phosphate; Repeat; Transit peptide.	Belongs to the serine/threonine dehydratase family; Contains 2 ACT-like domains.; KEGG: psp:PSPPH_1669 threonine dehydratase
16	POG_GCA_000264555.1_04126	PCHLO6_RS20395	E:COG1171	K01751	Diaminopropionate ammonia-lyase		KEGG: ppg:PputGB1_2576 diaminopropionate ammonia-lyase
20	POG_GCA_000264555.1_00873	PCHLO6_RS04345	E:COG1174	K05846	Osmoprotectant import permease protein OsmY	Cell inner membrane; Cell membrane; Membrane; Transmembrane; Transmembrane helix; Transport.	Part of the OsmU ABC transporter complex, which is involved in the uptake of osmoprotectants such as choline-O- sulfate and glycine betaine. Probably responsible for the translocation of the substrate across the membrane; Belongs to the binding-protein-dependent transport system permease family; Contains 1 ABC transmembrane type-1 domain.
20	POG_GCA_000264555.1_00871	PCHLO6_RS04335	E:COG1174	K05846	Osmoprotectant import permease protein OsmW	Cell inner membrane; Cell membrane; Membrane; Transmembrane; Transmembrane helix; Transport.	Part of the OsmU ABC transporter complex, which is involved in the uptake of osmoprotectants such as choline-O- sulfate and glycine betaine. Probably responsible for the translocation of the substrate across the membrane; Belongs to the binding-protein-dependent transport system permease family; Contains 1 ABC transmembrane type-1 domain.
18	POG_GCA_000264555.1_03268	MAO,aofH,PCHLO6_RS16175	E:COG1231	K00274	Monoamine oxidase	Alternative splicing; Chromatin regulator; FAD; Flavoprotein; Oxidoreductase; Repressor; Transcription; Transcription regulation.	Probable histone demethylase that reduces the levels of histone H3 'Lys-4' methylation in chromatin; Belongs to the flavin monoamine oxidase family; Contains 1 SWIRM domain.; KEGG: pch:EY04_15470 monoamine oxidase
19	POG_GCA_000264555.1_05238	PCHLO6_RS25925	E:COG1280	K05835	Threonine efflux protein	Cell inner membrane; Cell membrane; Membrane; Transmembrane; Transmembrane helix; Transport.	Conducts the efflux of threonine; Belongs to the rht family.
20	POG_GCA_000264555.1_04939	PCHLO6_RS24435	E:COG1280	K03329	Leucine efflux protein	Amino-acid transport; Cell membrane; Membrane; Transmembrane; Transmembrane helix; Transport.	Exporter of leucine; Belongs to the rht family.
19	POG_GCA_000264555.1_01865	PCHLO6_RS09290	E:COG1280	K05835	Uncharacterized membrane protein YrhP	Cell membrane; Membrane; Transmembrane; Transmembrane helix.	Belongs to the rht family.
20	POG_GCA_000264555.1_05985	PCHLO6_RS29625	E:COG1280	K05834	Homoserine/homoserine lactone efflux protein	Cell membrane; Membrane; Transmembrane; Transmembrane helix; Transport.	Conducts the efflux of homoserine and homoserine lactone; Belongs to the rht family.
13	POG_GCA_000264555.1_02826	PCHLO6_RS14020	E:COG1280	K11250	Cysteine/O-acetylserine efflux protein	Amino-acid transport; Cell inner membrane; Cell membrane; Membrane; Transmembrane; Transmembrane helix; Transport.	Exporter of O-acetylserine (OAS) and cysteine; Belongs to the rht family.
20	POG_GCA_000264555.1_05153	PCHLO6_RS25495	E:COG1280	K05835	Threonine efflux protein	Cell inner membrane; Cell membrane; Membrane; Transmembrane; Transmembrane helix; Transport.	Conducts the efflux of threonine; Belongs to the rht family.
19	POG_GCA_000264555.1_04488	PCHLO6_RS22205	E:COG1280	K05834	Leucine efflux protein	Amino-acid transport; Cell membrane; Membrane; Transmembrane; Transmembrane helix; Transport.	Exporter of leucine; Belongs to the rht family.
20	POG_GCA_000264555.1_01793	PCHLO6_RS08935	E:COG1280	K11250	Leucine efflux protein	Amino-acid transport; Cell membrane; Membrane; Transmembrane; Transmembrane helix; Transport.	Exporter of leucine; Belongs to the rht family.
20	POG_GCA_000264555.1_02759	PCHLO6_RS13675	E:COG1280	K11250	Uncharacterized membrane protein YrhP	Cell membrane; Membrane; Transmembrane; Transmembrane helix.	Belongs to the rht family.
14	POG_GCA_000264555.1_04697	PCHLO6_RS23235	E:COG1280	K05834	Threonine efflux protein	Cell inner membrane; Cell membrane; Membrane; Transmembrane; Transmembrane helix; Transport.	Conducts the efflux of threonine; Belongs to the rht family.
20	POG_GCA_000264555.1_03470	PCHLO6_RS17180	E:COG1280	K05834	cysteine/O-acetylserine efflux protein
20	POG_GCA_000264555.1_06264	PCHLO6_RS31000	E:COG1280	K11250	Leucine efflux protein	Amino-acid transport; Cell membrane; Membrane; Transmembrane; Transmembrane helix; Transport.	Exporter of leucine; Belongs to the rht family.
20	POG_GCA_000264555.1_02844	PCHLO6_RS14105	E:COG1280	K11249	Cysteine/O-acetylserine efflux protein	Amino-acid transport; Cell inner membrane; Cell membrane; Membrane; Transmembrane; Transmembrane helix; Transport.	Exporter of O-acetylserine (OAS) and cysteine; Belongs to the rht family.
20	POG_GCA_000264555.1_02823	PCHLO6_RS14005	E:COG1296		Inner membrane protein YgaZ	Cell inner membrane; Cell membrane; Membrane; Transmembrane; Transmembrane helix; Transport.	Belongs to the AzlC family.
19	POG_GCA_000264555.1_02519	PCHLO6_RS12520	E:COG1305		hypothetical protein
19	POG_GCA_000264555.1_00584	PCHLO6_RS02910	E:COG1305		Uncharacterized protein MT2645		To M.leprae ML0607.
19	POG_GCA_000264555.1_02546	PCHLO6_RS12645	E:COG1305		Uncharacterized protein ML0607		To M.tuberculosis Rv2569c.
20	POG_GCA_000264555.1_01871	PCHLO6_RS09320	E:COG1305		hypothetical protein
20	POG_GCA_000264555.1_04506	DNPEP,PCHLO6_RS22295	E:COG1362	K01267	Aspartyl aminopeptidase	Aminopeptidase; Hydrolase; Metal-binding; Metalloprotease; Protease; Zinc.	Belongs to the peptidase M18 family.; KEGG: pmy:Pmen_1231 aspartyl aminopeptidase
20	POG_GCA_000264555.1_04460	PCHLO6_RS22065	E:COG1363	K01269	Putative aminopeptidase YhfE	Aminopeptidase; Hydrolase; Metal-binding; Metalloprotease; Protease.	Belongs to the peptidase M42 family.; KEGG: bce:BC0901 aminopeptidase; Aminopeptidases
20	POG_GCA_000264555.1_04822	argJ,PCHLO6_RS23850	E:COG1364	K00620	Glutamate N-acetyltransferase	Acyltransferase; Amino-acid biosynthesis; Arginine biosynthesis; Autocatalytic cleavage; Cytoplasm; Multifunctional enzyme; Transferase.	Catalyzes two activities which are involved in the cyclic version of arginine biosynthesis: the synthesis of N- acetylglutamate from glutamate and acetyl-CoA as the acetyl donor, and of ornithine by transacetylation between N(2)-acetylornithine and glutamate; Belongs to the ArgJ family.; KEGG: pae:PA4402 glutamate N-acetyltransferase / amino-acid N-acetyltransferase
20	POG_GCA_000264555.1_02192	aspC,PCHLO6_RS10910	E:COG1448	K00813	Aspartate transaminase	Aminotransferase; Cytoplasm; Pyridoxal phosphate; Transferase.	Belongs to the class-I pyridoxal-phosphate-dependent aminotransferase family.; KEGG: mht:D648_13330 aspartate aminotransferase
20	POG_GCA_000264555.1_01693	tyrB,PCHLO6_RS08435	E:COG1448	K00832	Aromatic-amino-acid transaminase	Amino-acid biosynthesis; Aminotransferase; Aromatic amino acid biosynthesis; Cytoplasm; Pyridoxal phosphate; Transferase.	Belongs to the class-I pyridoxal-phosphate-dependent aminotransferase family.; KEGG: pfl:PFL_1609 aromatic-amino-acid transaminase
20	POG_GCA_000264555.1_01413	hipO,PCHLO6_RS07045	E:COG1473	K01451	Hippurate hydrolase	Cobalt; Hydrolase.	Hydrolyzes most efficiently N-acetyl derivatives of aromatic amino acids but is also active on other amino acids. L- stereospecific. Belongs to the peptidase M20 family.; KEGG: pch:EY04_06165 hippurate hydrolase
19	POG_GCA_000264555.1_05691	APEH,PCHLO6_RS28160	E:COG1506	K01303	Acylaminoacyl-peptidase	Aminopeptidase; Hydrolase; Protease; Serine protease; Signal.	Exopeptidase that catalyzes the removal of dipeptide units (NH2-P2-P1- or -P1'-P2'-COOH) from the free amino or carboxy termini. Prefers substrates composed of bulky, hydrophobic amino acids at P1 and P1' positions. Has endopeptidase activity on N- terminally blocked peptide derivatives which contain aromatic amino acid residue at the P1 position. Exopeptidase activity is much higher than its end…
20	POG_GCA_000264555.1_00390	pheA1,PCHLO6_RS01940	E:COG1605	K04093	Chorismate mutase	Amino-acid biosynthesis; Aromatic amino acid biosynthesis; Isomerase; Periplasm; Phenylalanine biosynthesis; Signal.	Catalyzes the Claisen rearrangement of chorismate to prephenate. The joint presence of this enzyme together with cyclohexadienyl dehydratase and aromatic aminotransferase in the periplasmic compartment comprises a complete three-step chorismate to phenylalanine pathway and accounts for the so called hidden overflow pathway to phenylalanine in P.aeruginosa, in which two possible routes for it exis…
20	POG_GCA_000264555.1_03547	pchB,PCHLO6_RS17550	E:COG1605	K04782	Isochorismate lyase	Isomerase; Lyase.	Involved in the incorporation of salicylate into the siderophore pyochelin. Catalyzes the elimination of the enolpyruvyl side chain from isochorismate to yield salicylate and pyruvate via a rare pericyclic hydrogen transfer mechanism from C2 to C5. PchB also catalyzes the nonphysiological Claisen rearrangement of chorismate to prephenate in which the pyruvylenol tail is transferred from a C3 ethe…
20	POG_GCA_000264555.1_04435	pheA,PCHLO6_RS21935	E:COG1605|E:COG0077	K14170	Chorismate mutase	Amino-acid biosynthesis; Aromatic amino acid biosynthesis; Cytoplasm; Isomerase; Lyase; Multifunctional enzyme; Phenylalanine biosynthesis.	Contains 1 ACT domain; Contains 1 chorismate mutase domain; Contains 1 prephenate dehydratase domain.; KEGG: pre:PCA10_39170 chorismate mutase / prephenate dehydratase
20	POG_GCA_000264555.1_00872	PCHLO6_RS04340	E:COG1732	K05845	Osmoprotectant-binding protein OsmX	Periplasm; Signal; Transport.	Part of the OsmU ABC transporter complex, which is involved in the uptake of osmoprotectants such as choline-O- sulfate and glycine betaine; Belongs to the OsmX family.
20	POG_GCA_000264555.1_02369	cansdh	E:COG1748	K13746	Carboxynorspermidine synthase	NADP; Oxidoreductase; Polyamine biosynthesis.	Required for norspermidine biosynthesis and for biofilm formation; Belongs to the saccharopine dehydrogenase family. carboxynorspermidine synthase subfamily.; KEGG: vch:VC1624 carboxynorspermidine synthase
20	POG_GCA_000264555.1_05764	sdaA,sdaB,tdcG,PCHLO6_RS28525	E:COG1760	K01752	L-serine ammonia-lyase	4Fe-4S; Gluconeogenesis; Iron; Iron-sulfur; Lyase; Metal-binding.	Belongs to the iron-sulfur dependent L-serine dehydratase family.; KEGG: seb:STM474_1848 L-serine dehydratase
19	POG_GCA_000264555.1_04758	sdaA,sdaB,tdcG,PCHLO6_RS23530	E:COG1760	K01752	L-serine ammonia-lyase	4Fe-4S; Gluconeogenesis; Iron; Iron-sulfur; Lyase; Metal-binding.	Belongs to the iron-sulfur dependent L-serine dehydratase family.; KEGG: seb:STM474_1848 L-serine dehydratase
20	POG_GCA_000264555.1_00987	sdaA,sdaB,tdcG,PCHLO6_RS04915	E:COG1760	K01752	L-serine ammonia-lyase	4Fe-4S; Gluconeogenesis; Iron; Iron-sulfur; Lyase; Metal-binding.	Belongs to the iron-sulfur dependent L-serine dehydratase family.; KEGG: seb:STM474_1848 L-serine dehydratase
20	POG_GCA_000264555.1_01585	ptrB,PCHLO6_RS07895	E:COG1770	K01354	Oligopeptidase B	Aminopeptidase; Hydrolase; Protease; Serine protease; Signal.	Sequentially removes dipeptide units (NH3-P2-P1-) from the amino termini of peptides and proteins. Is able to catalyze the removal of Asp-Arg from the amino termini of angiotensins I and II. Has slight endopeptidase activity on N-terminally blocked peptide derivatives which contain arginine residues at the P1 position. Does not hydrolyze Ala-Ala-Ala and Ala-Ala-Ala-Ala substrates or isulin beta c…
20	POG_GCA_000264555.1_02948	racD,PCHLO6_RS14615	E:COG1794	K01779	Aspartate racemase	Isomerase.	Belongs to the aspartate/glutamate racemases family.; KEGG: ecp:ECP_2853 aspartate racemase
20	POG_GCA_000264555.1_04436	serC,PSAT1,PCHLO6_RS21940	E:COG1932	K00831	Phosphoserine transaminase	Amino-acid biosynthesis; Aminotransferase; Cytoplasm; Pyridoxal phosphate; Pyridoxine biosynthesis; Serine biosynthesis; Transferase.	Catalyzes the reversible conversion of 3- phosphohydroxypyruvate to phosphoserine and of 3-hydroxy-2-oxo-4- phosphonooxybutanoate to phosphohydroxythreonine; Belongs to the class-V pyridoxal-phosphate-dependent aminotransferase family. SerC subfamily.; KEGG: pae:PA3167 phosphoserine aminotransferase
20	POG_GCA_000264555.1_02865	adiA,PCHLO6_RS14210	E:COG1982	K01584	Arginine decarboxylase	Decarboxylase; Lyase; Pyridoxal phosphate; Spermidine biosynthesis.	Belongs to the Orn/Lys/Arg decarboxylase class-I family.; KEGG: pae:PA1818 arginine decarboxylase
20	POG_GCA_000264555.1_01593	atzF,PCHLO6_RS07935	E:COG1984	K01457	Allophanate hydrolase		To E.coli YbgK; To B.subtilis YcsJ and yeast urea amidolyase (DUR1,2).; KEGG: pen:PSEEN4016 allophanate hydrolase
20	POG_GCA_000264555.1_05739	ltaE,PCHLO6_RS28400	E:COG2008	K01620	Low-specificity L-threonine aldolase	Lyase; Pyridoxal phosphate.	Catalyzes the cleavage of L-allo-threonine and L- threonine to glycine and acetaldehyde; Belongs to the threonine aldolase family.; KEGG: ppu:PP_0321 threonine aldolase
20	POG_GCA_000264555.1_04633	ltaE,PCHLO6_RS22920	E:COG2008	K01620	Low-specificity L-threonine aldolase	Alternative splicing; Lyase; Pyridoxal phosphate.	Belongs to the threonine aldolase family.; KEGG: pala:CO695_07420 threonine aldolase
20	POG_GCA_000264555.1_05846	metX,PCHLO6_RS28940	E:COG2021	K00641	Homoserine O-acetyltransferase	Acyltransferase; Amino-acid biosynthesis; Cytoplasm; Methionine biosynthesis; Transferase.	Involved in the methionine biosynthesis. Catalyzes the transfer of the acetyl group from acetyl-CoA to the hydroxyl group of L-homoserine to yield O-acetyl-L-homoserine; Belongs to the AB hydrolase superfamily. HTA family.; KEGG: pman:OU5_3846 homoserine O-acetyltransferase/O-succinyltransferase
19	POG_GCA_000264555.1_06215	mmuM,BHMT2,PCHLO6_RS30765	E:COG2040	K00547	Homocysteine S-methyltransferase	Amino-acid biosynthesis; Metal-binding; Methionine biosynthesis; Methyltransferase; S-adenosyl-L-methionine; Transferase; Zinc.	Catalyzes methyl transfer from S-methylmethionine (SMM) to adenosyl-L-homocysteine (AdoMet). SMM degradation (by HMT-1, HMT-2, HMT-3 and HMT-4) and biosynthesis (by MMT1) constitute the SMM cycle in plants, which is probably required to achieve short term control of AdoMet level (By similarity); Contains 1 Hcy-binding domain.; KEGG: mks:LG40_05360 homocysteine S-methyltransferase
20	POG_GCA_000264555.1_01592	PCHLO6_RS07930	E:COG2049	K06351	Kinase A inhibitor	ATP-binding; Nucleotide-binding; Protein kinase inhibitor; Sporulation.	Is a potent inhibitor of the autophosphorylation reaction of kinase A and its reverse reaction, but does not inhibit phosphate transfer to the Spo0F response regulator once kinase A is phosphorylated. KipI is an inhibitor of the catalytic domain of kinase A affecting the ATP/ADP reactions and not the phosphotransferase functions of this domain. The inhibition is noncompetitive with respect to ATP.
20	POG_GCA_000264555.1_03012	glsA,GLS,PCHLO6_RS14925	E:COG2066	K01425	Glutaminase	Hydrolase.	Belongs to the glutaminase family.; KEGG: pmy:Pmen_0139 glutaminase
18	POG_GCA_000264555.1_02569	PCHLO6_RS12760	E:COG2113	K02002	glycine betaine/proline transport system substrate-binding protein
19	POG_GCA_000264555.1_02630	PCHLO6_RS13050	E:COG2113	K02002	glycine betaine/proline transport system substrate-binding protein
11	POG_GCA_000963835.1_01568	PCL1606_RS07760	E:COG2113	K02002	glycine betaine/proline transport system substrate-binding protein
19	POG_GCA_000264555.1_00410	PCHLO6_RS02040	E:COG2113	K02002	glycine betaine/proline transport system substrate-binding protein
20	POG_GCA_000264555.1_05765	PCHLO6_RS28530	E:COG2113	K02002	Uncharacterized protein ORF1	Signal.
20	POG_GCA_000264555.1_05756	PCHLO6_RS28485	E:COG2113	K02002	Uncharacterized protein ORF1	Signal.
20	POG_GCA_000264555.1_00034	PCHLO6_RS00170	E:COG2113	K02002	Uncharacterized protein ORF1	Signal.
18	POG_GCA_000264555.1_03471	PCHLO6_RS17185	E:COG2113	K02002	Uncharacterized protein ORF1	Signal.
20	POG_GCA_000264555.1_01805	PCHLO6_RS08990	E:COG2113	K02002	Glycine betaine-binding protein OpuAC	Amino-acid transport; Cell membrane; Lipoprotein; Membrane; Palmitate; Signal; Transport.	Involved in a multicomponent binding-protein-dependent transport system for glycine betaine.
20	POG_GCA_000264555.1_01162	dapD,PCHLO6_RS05790	E:COG2171	K00674	2,3,4,5-tetrahydropyridine-2,6-dicarboxylate N-succinyltransferase	Acyltransferase; Amino-acid biosynthesis; Cytoplasm; Diaminopimelate biosynthesis; Lysine biosynthesis; Magnesium; Metal-binding; Transferase.	Catalyzes the conversion of the cyclic tetrahydrodipicolinate (THDP) into the acyclic N-succinyl-L-2- amino-6-oxopimelate using succinyl-CoA; Belongs to the type 2 tetrahydrodipicolinate N- succinyltransferase family.; KEGG: pmy:Pmen_3059 2,3,4,5-tetrahydropyridine-2,6-dicarboxylate N-succinyltransferase
20	POG_GCA_000264555.1_04751	arcA,PCHLO6_RS23495	E:COG2235	K01478	Arginine deiminase	Arginine metabolism; Cytoplasm; Hydrolase.	Belongs to the arginine deiminase family.; KEGG: pmos:O165_017955 arginine deiminase
20	POG_GCA_000264555.1_00059	PCHLO6_RS00295	E:COG2303	K06151	Gluconate 2-dehydrogenase (acceptor)	Cell membrane; FAD; Flavoprotein; Membrane; Oxidoreductase; Signal.	Part of the heterotrimer that catalyzes the conversion of D-gluconate to 2-dehydro-D-gluconate. This subunit functions as the dehydrogenase. Belongs to the GMC oxidoreductase family.; KEGG: spe:Spro_2137 gluconate 2-dehydrogenase alpha chain
20	POG_GCA_000264555.1_05771	betA,CHDH,PCHLO6_RS28560	E:COG2303	K00108	Choline dehydrogenase	FAD; Flavoprotein; NAD; Oxidoreductase.	Involved in the biosynthesis of the osmoprotectant glycine betaine. Catalyzes the oxidation of choline to betaine aldehyde and betaine aldehyde to glycine betaine at the same rate; Belongs to the GMC oxidoreductase family.; KEGG: vtu:IX91_18775 choline dehydrogenase
19	POG_GCA_000264555.1_03492	betA,CHDH,PCHLO6_RS17285	E:COG2303	K00108	Choline dehydrogenase	FAD; Flavoprotein; NAD; Oxidoreductase.	Involved in the biosynthesis of the osmoprotectant glycine betaine. Catalyzes the oxidation of choline to betaine aldehyde and betaine aldehyde to glycine betaine at the same rate; Belongs to the GMC oxidoreductase family.; KEGG: ops:A8A54_16110 choline dehydrogenase
8	POG_GCA_000281915.1_02719	betA,CHDH,PCHL3084_RS13515	E:COG2303	K00108	Choline dehydrogenase	FAD; Flavoprotein; NAD; Oxidoreductase.	Involved in the biosynthesis of the osmoprotectant glycine betaine. Catalyzes the oxidation of choline to betaine aldehyde and betaine aldehyde to glycine betaine at the same rate; Belongs to the GMC oxidoreductase family.; KEGG: pag:PLES_32031 choline dehydrogenase
20	POG_GCA_000264555.1_02517	betA,CHDH,PCHLO6_RS12510	E:COG2303	K00108	Choline dehydrogenase	FAD; Flavoprotein; NAD; Oxidoreductase.	Involved in the biosynthesis of the osmoprotectant glycine betaine. Catalyzes the oxidation of choline to betaine aldehyde and betaine aldehyde to glycine betaine at the same rate; Belongs to the GMC oxidoreductase family.; KEGG: pch:EY04_11290 choline dehydrogenase
20	POG_GCA_000264555.1_05871	FAO3,PCHLO6_RS29065	E:COG2303	K17756	Long-chain-alcohol oxidase	FAD; Flavoprotein; Membrane; Oxidoreductase; Transmembrane; Transmembrane helix.	Long-chain fatty alcohol oxidase involved in the omega- oxidation pathway of lipid degradation; Belongs to the GMC oxidoreductase family.; KEGG: ini:109175809 long-chain-alcohol oxidase
20	POG_GCA_000264555.1_04229	DPEP,PCHLO6_RS20905	E:COG2355	K01273	Membrane dipeptidase	Aminopeptidase; Dipeptidase; Hydrolase; Metal-binding; Metalloprotease; Protease; Signal; Zinc.	Belongs to the peptidase M19 family.; KEGG: pen:PSEEN3220 membrane dipeptidase
20	POG_GCA_000264555.1_05750	DPEP,PCHLO6_RS28455	E:COG2355	K01273	Membrane dipeptidase	Aminopeptidase; Hydrolase; Metal-binding; Metalloprotease; Protease; Zinc.	Belongs to the peptidase M19 family.; KEGG: pmy:Pmen_0497 membrane dipeptidase
13	POG_GCA_000963835.1_01570	ocd,PCL1606_RS07770	E:COG2423	K01750	Ornithine cyclodeaminase	NAD; Nucleotide-binding; Oxidoreductase.	Catalyzes the NAD(+)-dependent oxidative deamination of L-alanine to pyruvate, and the reverse reaction, the reductive amination of pyruvate. Its physiological role is not known. Can not use NADP(+) instead of NAD(+) as a cosubstrate. In the deamination direction, can also efficiently use L-2-aminobutyrate as substrate. In the reductive amination direction, also exhibits high activity with 2-oxob…
20	POG_GCA_000264555.1_01040	dauB,PCHLO6_RS05180	E:COG2423	K19744	L-arginine dehydrogenase	NAD; NADP; Oxidoreductase.	Involved in the anabolism of D-lysine and D-arginine. Under aerobic conditions, the arginine succinyltransferase (AST) and arginine transaminase (ATA) pathways are 2 major routes for L- arginine utilization as the sole source of carbon and nitrogen. The D-to-L racemization of arginine by DauA and DauB is necessary, before to be channeled into the AST and/or ATA pathways. DauB catalyzes the synthe…
20	POG_GCA_000264555.1_00269	dcyD,PCHLO6_RS01345	E:COG2515	K05396	D-cysteine desulfhydrase	Lyase; Pyridoxal phosphate.	Catalyzes the alpha,beta-elimination reaction of D- cysteine and of several D-cysteine derivatives. It could be a defense mechanism against D-cysteine; Belongs to the ACC deaminase/D-cysteine desulfhydrase family.; KEGG: pch:EY04_00720 D-cysteine desulfhydrase
20	POG_GCA_000264555.1_04063	PCHLO6_RS20085	E:COG2515	K01505	1-aminocyclopropane-1-carboxylate deaminase		KEGG: pch:EY04_19875 1-aminocyclopropane-1-carboxylate deaminase
20	POG_GCA_000264555.1_01491	PCHLO6_RS07430	E:COG2716	K03567	Glycine cleavage system transcriptional repressor	Cytoplasm; Repeat; Repressor; Transcription; Transcription regulation.	Negative transcriptional regulator of the glycine cleavage system operon (GCV). Does not autoregulate its own expression. It is not yet known how GcvR acts as a repressor. It does not seem to bind DNA. It could interact with GcvA and suppress its activatory activity. Contains 2 ACT domains.
20	POG_GCA_000264555.1_05713	PCHLO6_RS28270	E:COG2716	K03567	glycine cleavage system transcriptional repressor
18	POG_GCA_000264555.1_00799	xynB,PCHLO6_RS03955	E:COG2755	K01198|K01209	Xylan 1,4-beta-xylosidase		KEGG: beba:BWI17_02655 xylan 1,4-beta-xylosidase
20	POG_GCA_000264555.1_04397	tesA,PCHLO6_RS21750	E:COG2755	K10804	Esterase TesA	Hydrolase; Secreted; Serine esterase; Signal.	Esterase that exhibits the highest activity towards Tween detergents and p-nitrophenyl esters of short acyl chain length. Also displays a low thioesterase activity towards palmitoyl-coenzyme A, but is not active towards acetyl-coenzyme A; Belongs to the 'GDSL' lipolytic enzyme family.; KEGG: ppu:PP_2318 acyl-CoA thioesterase I; Thiolester hydrolases
20	POG_GCA_000264555.1_04042	PCHLO6_RS19980	E:COG2866		Uncharacterized protein ZMO1242
20	POG_GCA_000264555.1_02908	GDH2,PCHLO6_RS14420	E:COG2902	K15371	Glutamate dehydrogenase	Disulfide bond; NAD; Oxidoreductase.	Involved in arginine catabolism by converting L- glutamate, into 2-oxoglutarate, which is then channeled into the tricarboxylic acid cycle. Can also utilize other amino acids of the glutamate family; Belongs to the Glu/Leu/Phe/Val dehydrogenases family.; KEGG: pae:PA3068 glutamate dehydrogenase
7	POG_GCA_000963835.1_05180	aguA,PCL1606_RS25640	E:COG2957	K10536	Agmatine deiminase	Hydrolase.	Belongs to the agmatine deiminase family.; KEGG: spe:Spro_2482 agmatine deiminase
7	POG_GCA_000963835.1_05183	aguA,PCL1606_RS25655	E:COG2957	K10536	Agmatine deiminase	Hydrolase.	Belongs to the agmatine deiminase family.; KEGG: pcz:PCL1606_52640 agmatine deiminase
20	POG_GCA_000264555.1_00324	aguA,PCHLO6_RS01615	E:COG2957	K10536	Agmatine deiminase	Hydrolase; Polyamine biosynthesis.	Mediates the hydrolysis of agmatine into N- carbamoylputrescine in the arginine decarboxylase (ADC) pathway of putrescine biosynthesis, a basic polyamine; Belongs to the agmatine deiminase family.; KEGG: pfl:PFL_0308 agmatine deiminase
20	POG_GCA_000264555.1_00949	PCHLO6_RS04725	E:COG2981	K06203	Sulfate transporter CysZ	Amino-acid biosynthesis; Cell inner membrane; Cell membrane; Cysteine biosynthesis; Membrane; Sulfate transport; Transmembrane; Transmembrane helix; Transport.	High affinity, high specificity proton-dependent sulfate transporter, which mediates sulfate uptake. Provides the sulfur source for the cysteine synthesis pathway; Belongs to the CysZ family.
20	POG_GCA_000264555.1_00479	hutH,HAL,PCHLO6_RS02385	E:COG2986	K01745	Histidine ammonia-lyase	Cytoplasm; Lyase; Phenylpropanoid metabolism.	Catalyzes the non-oxidative deamination of L- phenylalanine to form trans-cinnamic acid, the first step in the phenylpropanoid pathway; Belongs to the PAL/histidase family.; KEGG: pch:EY04_01730 histidine ammonia-lyase
20	POG_GCA_000264555.1_00414	hutH,HAL,PCHLO6_RS02060	E:COG2986	K01745	Histidine ammonia-lyase	Cytoplasm; Histidine metabolism; Lyase.	Belongs to the PAL/histidase family.; KEGG: pfl:PFL_0407 histidine ammonia-lyase
19	POG_GCA_000264555.1_00413	hutH,HAL,PCHLO6_RS02055	E:COG2986	K01745	Histidine ammonia-lyase	Cytoplasm; Histidine metabolism; Lyase.	Belongs to the PAL/histidase family.; KEGG: pfl:PFL_0406 histidine ammonia-lyase
11	POG_GCA_000963835.1_01571	hutH,HAL,PCL1606_RS07775	E:COG2986	K01745	Histidine ammonia-lyase	Cytoplasm; Histidine metabolism; Lyase.	Belongs to the PAL/histidase family.; KEGG: pcz:PCL1606_15980 histidine ammonia-lyase
20	POG_GCA_000264555.1_00408	hutU,UROC1,PCHLO6_RS02030	E:COG2987	K01712	Urocanate hydratase	Cytoplasm; Histidine metabolism; Lyase; NAD.	Belongs to the urocanase family.; KEGG: pfo:Pfl01_0360 urocanate hydratase
20	POG_GCA_000264555.1_04635	astE,PCHLO6_RS22930	E:COG2988	K05526	Succinylglutamate desuccinylase	Arginine metabolism; Hydrolase; Metal-binding; Zinc.	Transforms N(2)-succinylglutamate into succinate and glutamate; Belongs to the AspA/AstE family. Succinylglutamate desuccinylase subfamily.; KEGG: pae:PA0901 succinylglutamate desuccinylase
17	POG_GCA_000264555.1_02466	dsdA,PCHLO6_RS12255	E:COG3048	K01753	D-serine ammonia-lyase	Lyase; Pyridoxal phosphate.	Belongs to the serine/threonine dehydratase family. DsdA subfamily.; KEGG: pch:EY04_11015 D-serine dehydratase
19	POG_GCA_000264555.1_02316	astA,PCHLO6_RS11510	E:COG3138	K00673	Arginine N-succinyltransferase	Acyltransferase; Arginine metabolism; Transferase.	Catalyzes the transfer of succinyl-CoA to arginine to produce N(2)-succinylarginine; Belongs to the arginine N-succinyltransferase family.; KEGG: vsp:VS_2860 arginine N-succinyltransferase
20	POG_GCA_000264555.1_04639	astA,PCHLO6_RS22950	E:COG3138	K00673	Arginine N-succinyltransferase	Acyltransferase; Arginine metabolism; Transferase.	Belongs to the succinylarginine dihydrolase family.; KEGG: pmk:MDS_1749 arginine N-succinyltransferase
20	POG_GCA_000264555.1_04640	astA,PCHLO6_RS22955	E:COG3138	K00673	Arginine N-succinyltransferase	Acyltransferase; Arginine metabolism; Transferase.	Catalyzes the transfer of succinyl-CoA to arginine to produce N(2)-succinylarginine. Also acts on L-ornithine. Belongs to the succinylarginine dihydrolase family.; KEGG: vfu:vfu_B00710 arginine N-succinyltransferase
19	POG_GCA_000264555.1_02317	astA,PCHLO6_RS11515	E:COG3138	K00673	Arginine N-succinyltransferase	Acyltransferase; Arginine metabolism; Transferase.	Catalyzes the transfer of succinyl-CoA to arginine to produce N(2)-succinylarginine. Also acts on L-ornithine. Belongs to the succinylarginine dihydrolase family.; KEGG: pch:EY04_10270 arginine N-succinyltransferase
20	POG_GCA_000264555.1_03513	HPD,hppD,PCHLO6_RS17390	E:COG3185	K00457	4-hydroxyphenylpyruvate dioxygenase	Dioxygenase; Iron; Metal-binding; Oxidoreductase; Phenylalanine catabolism; Tyrosine catabolism.	Belongs to the 4HPPD family.; KEGG: xpo:XPG1_1939 4-hydroxyphenylpyruvate dioxygenase
19	POG_GCA_000264555.1_05423	HPD,hppD,PCHLO6_RS26835	E:COG3185|G:COG1082	K00457	4-hydroxyphenylpyruvate dioxygenase	Dioxygenase; Iron; Metal-binding; Oxidoreductase; Phenylalanine catabolism; Tyrosine catabolism.	Belongs to the 4HPPD family.; KEGG: esa:ESA_01077 4-hydroxyphenylpyruvate dioxygenase
20	POG_GCA_000264555.1_01695	phhA,PAH,PCHLO6_RS08445	E:COG3186	K00500	Phenylalanine 4-monooxygenase	Iron; Metal-binding; Monooxygenase; Oxidoreductase; Phenylalanine catabolism.	Belongs to the biopterin-dependent aromatic amino acid hydroxylase family.; KEGG: ppu:PP_4490 phenylalanine-4-hydroxylase
20	POG_GCA_000264555.1_04374	aroF,aroG,aroH,PCHLO6_RS21630	E:COG3200	K01626	3-deoxy-7-phosphoheptulonate synthase	Alternative splicing; Amino-acid biosynthesis; Aromatic amino acid biosynthesis; Chloroplast; Plastid; Transferase; Transit peptide.	Belongs to the class-II DAHP synthase family.; KEGG: ppu:PP_1866 3-deoxy-7-phosphoheptulonate synthase
20	POG_GCA_000264555.1_00756	TDO2,kynA,PCHLO6_RS03745	E:COG3483	K00453	Tryptophan 2,3-dioxygenase	Dioxygenase; Heme; Iron; Metal-binding; Oxidoreductase; Tryptophan catabolism.	Catalyzes the oxidative cleavage of the L-tryptophan (L- Trp) pyrrole ring; Belongs to the tryptophan 2,3-dioxygenase family.; KEGG: pch:EY04_03145 tryptophan 2,3-dioxygenase
19	POG_GCA_000264555.1_03920	PCHLO6_RS19375	E:COG3616		hypothetical protein
20	POG_GCA_000264555.1_03828	dsdA,PCHLO6_RS18945	E:COG3616	K01753	D-serine ammonia-lyase	Lyase; Pyridoxal phosphate.	Catalyzes the reversible cleavage of D-theronine or D- allothreonine into glycine and acetaldehyde. Can also cleave D- beta-phenylserine, D-beta-hydroxy-alpha-aminovaleric acid, D-beta- 3,4-dihydroxyphenylserine and D-beta-3,4- methylenedioxyphenylserine into glycine and the corresponding aldehyde compounds. Inactive towards D-serine, beta- hydroxyaspartate and O-phospho-DL-threonine; Belongs to …
20	POG_GCA_000264555.1_04087	PCHLO6_RS20205	E:COG3633	K07862	Serine/threonine transporter SstT	Amino-acid transport; Cell inner membrane; Cell membrane; Membrane; Symport; Transmembrane; Transmembrane helix; Transport.	Involved in the import of serine and threonine into the cell, with the concomitant import of sodium (symport system); Belongs to the sodium:dicarboxylate (SDF) symporter (TC 2.A.23) family.
20	POG_GCA_000264555.1_00566	PCHLO6_RS02820	E:COG3705	K02502	ATP phosphoribosyltransferase regulatory subunit	Amino-acid biosynthesis; Cytoplasm; Histidine biosynthesis.	Required for the first step of histidine biosynthesis. May allow the feedback regulation of ATP phosphoribosyltransferase activity by histidine; Belongs to the class-II aminoacyl-tRNA synthetase family. HisZ subfamily.
20	POG_GCA_000264555.1_04637	astB,PCHLO6_RS22940	E:COG3724	K01484	N-succinylarginine dihydrolase	Arginine metabolism; Hydrolase.	Catalyzes the hydrolysis of N(2)-succinylarginine into N(2)-succinylornithine, ammonia and CO(2); Belongs to the succinylarginine dihydrolase family.; KEGG: sera:Ser39006_004535 succinylarginine dihydrolase
20	POG_GCA_000264555.1_00417	hutG,PCHLO6_RS02075	E:COG3741	K01458	N-formylglutamate deformylase		KEGG: pfl:PFL_0410 N-formylglutamate deformylase
20	POG_GCA_000264555.1_05962	afuC,fbpC,PCHLO6_RS29510	E:COG3842	K02010	Fe(3+)-transporting ATPase	ATP-binding; Cell inner membrane; Cell membrane; Hydrolase; Ion transport; Iron; Iron transport; Membrane; Nucleotide-binding; Transport.	Part of the ABC transporter complex FbpABC involved in Fe(3+) ions import. Responsible for energy coupling to the transport system; Belongs to the ABC transporter superfamily. Fe(3+) ion importer (TC 3.A.1.10) family; Contains 1 ABC transporter domain.; KEGG: eco:b0262 iron(III) transport system ATP-binding protein
19	POG_GCA_000264555.1_02424	PCHLO6_RS12045	E:COG3842	K11076	Galactose/methyl galactoside import ATP-binding protein MglA	ATP-binding; Cell membrane; Hydrolase; Membrane; Nucleotide-binding; Repeat; Sugar transport; Transport.	Part of the ABC transporter complex MglABC involved in galactose/methyl galactoside import. Responsible for energy coupling to the transport system; Belongs to the ABC transporter superfamily. Galactose/methyl galactoside importer (TC 3.A.1.2.3) family; Contains 2 ABC transporter domains.
20	POG_GCA_000264555.1_05918	PCHLO6_RS29300	E:COG3842	K11076	Spermidine/putrescine import ATP-binding protein PotA	ATP-binding; Cell membrane; Hydrolase; Membrane; Nucleotide-binding; Transport.	Part of the ABC transporter complex PotABCD involved in spermidine/putrescine import. Responsible for energy coupling to the transport system; Belongs to the ABC transporter superfamily. Spermidine/putrescine importer (TC 3.A.1.11.1) family; Contains 1 ABC transporter domain.
19	POG_GCA_000264555.1_05654	PCHLO6_RS27975	E:COG3842	K02052	sn-glycerol-3-phosphate import ATP-binding protein UgpC	ATP-binding; Cell inner membrane; Cell membrane; Hydrolase; Membrane; Nucleotide-binding; Sugar transport; Transport.	Part of the ABC transporter complex UgpABCE involved in sn-glycerol-3-phosphate import. Responsible for energy coupling to the transport system; Belongs to the ABC transporter superfamily. sn- glycerol-3-phosphate importer (TC 3.A.1.1.3) family; Contains 1 ABC transporter domain.
20	POG_GCA_000264555.1_04911	afuC,fbpC,PCHLO6_RS24295	E:COG3842	K02010	Fe(3+)-transporting ATPase	ATP-binding; Cell inner membrane; Cell membrane; Hydrolase; Membrane; Nucleotide-binding; Transport.	Part of the ABC transporter complex PotABCD involved in spermidine/putrescine import. Responsible for energy coupling to the transport system; Belongs to the ABC transporter superfamily. Spermidine/putrescine importer (TC 3.A.1.11.1) family; Contains 1 ABC transporter domain.; KEGG: ppu:PP_1078 iron(III) transport system ATP-binding protein
20	POG_GCA_000264555.1_05888	afuC,fbpC,PCHLO6_RS29150	E:COG3842	K02010	Fe(3+)-transporting ATPase	ATP-binding; Cell inner membrane; Cell membrane; Hydrolase; Membrane; Nucleotide-binding; Transport.	Part of the ABC transporter complex SsuABC involved in aliphatic sulfonates import. Responsible for energy coupling to the transport system; Belongs to the ABC transporter superfamily. Aliphatic sulfonates importer (TC 3.A.1.17.2) family; Contains 1 ABC transporter domain.; KEGG: pch:EY04_31200 iron(III) transport system ATP-binding protein
19	POG_GCA_000264555.1_01117	PCHLO6_RS05565	E:COG3842	K02052	Hemin import ATP-binding protein HmuV	ATP-binding; Cell inner membrane; Cell membrane; Hydrolase; Membrane; Nucleotide-binding; Transport.	Part of the ABC transporter complex HmuTUV involved in hemin import. Responsible for energy coupling to the transport system (Probable); Belongs to the ABC transporter superfamily. Heme (hemin) importer (TC 3.A.1.14.5) family; Contains 1 ABC transporter domain.
20	POG_GCA_000264555.1_00763	KYNU,kynU,PCHLO6_RS03780	E:COG3844	K01556	Kynureninase	Hydrolase; Pyridine nucleotide biosynthesis; Pyridoxal phosphate.	Catalyzes the cleavage of L-kynurenine (L-Kyn) and L-3- hydroxykynurenine (L-3OHKyn) into anthranilic acid (AA) and 3- hydroxyanthranilic acid (3-OHAA), respectively. Belongs to the kynureninase family.; KEGG: pae:PA2080 kynureninase
19	POG_GCA_000264555.1_02319	PCHLO6_RS11525	E:COG3931		hypothetical protein
20	POG_GCA_000264555.1_01450	lhpA,PCHLO6_RS07230	E:COG3938	K12658	4-hydroxyproline epimerase	Isomerase.	Catalyzes the epimerization of trans-4-hydroxy-L-proline (t4LHyp) to cis-4-hydroxy-D-proline (c4DHyp). Is likely involved in a degradation pathway that converts t4LHyp to alpha- ketoglutarate. Displays no proline racemase activity; Belongs to the proline racemase family.; KEGG: epr:EPYR_01097 4-hydroxyproline epimerase
20	POG_GCA_000264555.1_02615	iolD,PCHLO6_RS12980	E:COG3962	K03336	3D-(3,5/4)-trihydroxycyclohexane-1,2-dione acylhydrolase (decyclizing)	Hydrolase; Magnesium; Metal-binding; NAD; Thiamine pyrophosphate.	Involved in the cleavage of the C1-C2 bond of 3D- (3,5/4)-trihydroxycyclohexane-1,2-dione (THcHDO) to yield 5-deoxy- glucuronate (5DG); Belongs to the TPP enzyme family.; KEGG: gqu:AWC35_19265 3D-(3,5/4)-trihydroxycyclohexane-1,2-dione acylhydrolase (decyclizing)
20	POG_GCA_000264555.1_01963	hpxA,PCHLO6_RS09770	E:COG4126	K16841	Allantoin racemase	Isomerase; Plasmid.	Responsible for racemization of the D-5-substituted hydantoins to their corresponding L-amino acids. To yeast DCG1 and S.pombe SPAC1F7.10.; KEGG: ppu:PP_4310 allantoin racemase
20	POG_GCA_000264555.1_01336	PCHLO6_RS06665	E:COG4160	K10015	Histidine transport system permease protein HisM	Amino-acid transport; Cell inner membrane; Cell membrane; Membrane; Transmembrane; Transmembrane helix; Transport.	Part of the histidine permease ABC transporter. Also part of a lysine/arginine/ornithine transporter. Probably responsible for the translocation of the substrate across the membrane. Required to relay the ATPase-inducing signal from the solute-binding protein to HisP (By similarity); Belongs to the binding-protein-dependent transport system permease family. HisMQ subfamily; Contains 1 ABC transme…
20	POG_GCA_000264555.1_00349	PCHLO6_RS01740	E:COG4160	K02029	Glutamine transport system permease protein GlnP	Amino-acid transport; Cell inner membrane; Cell membrane; Membrane; Transmembrane; Transmembrane helix; Transport.	Part of the binding-protein-dependent transport system for glutamin; probably responsible for the translocation of the substrate across the membrane; Belongs to the binding-protein-dependent transport system permease family. HisMQ subfamily; Contains 1 ABC transmembrane type-1 domain.
20	POG_GCA_000264555.1_03817	PCHLO6_RS18890	E:COG4166	K13893	Putative binding protein BruAb2_0648	Periplasm; Signal; Transport.	Belongs to the bacterial solute-binding protein 5 family.
20	POG_GCA_000264555.1_02856	PCHLO6_RS14165	E:COG4166	K13893	Uncharacterized protein YejA	Signal.	To H.influenzae HbpA.
20	POG_GCA_000264555.1_02857	PCHLO6_RS14170	E:COG4166	K13893	Uncharacterized protein YejA	Signal.	To H.influenzae HbpA.
18	POG_GCA_000264555.1_02568	ABC.SS.A,PCHLO6_RS12755	E:COG4175	K02056	Monosaccharide-transporting ATPase	ATP-binding; Cell membrane; Hydrolase; Membrane; Nucleotide-binding; Transport.	ATP-binding (A) component of a common energy-coupling factor (ECF) ABC-transporter complex. Unlike classic ABC transporters this ECF transporter provides the energy necessary to transport a number of different substrates; Belongs to the ABC transporter superfamily. Energy- coupling factor EcfA family; Contains 1 ABC transporter domain.; KEGG: slc:SL103_31255 simple sugar transport system ATP-bind…
20	POG_GCA_000264555.1_05767	proV,PCHLO6_RS28540	E:COG4175	K02000	Quaternary-amine-transporting ATPase	Amino-acid transport; ATP-binding; CBS domain; Cell inner membrane; Cell membrane; Membrane; Nucleotide-binding; Repeat; Transport.	Involved in a multicomponent binding-protein-dependent transport system for glycine betaine/L-proline. Belongs to the ABC transporter superfamily; Contains 1 ABC transporter domain; Contains 2 CBS domains.; KEGG: ppu:PP_0294 glycine betaine/proline transport system ATP-binding protein
19	POG_GCA_000264555.1_00412	proV,PCHLO6_RS02050	E:COG4175	K02000	Quaternary-amine-transporting ATPase	Amino-acid transport; ATP-binding; CBS domain; Cell inner membrane; Cell membrane; Membrane; Nucleotide-binding; Repeat; Transport.	Involved in a multicomponent binding-protein-dependent transport system for glycine betaine/L-proline. Belongs to the ABC transporter superfamily; Contains 1 ABC transporter domain; Contains 2 CBS domains.; KEGG: pfo:Pfl01_0364 glycine betaine/proline transport system ATP-binding protein
19	POG_GCA_000264555.1_00411	PCHLO6_RS02045	E:COG4176	K02001	Glycine betaine transport system permease protein OpuAB	Amino-acid transport; Cell membrane; Membrane; Transmembrane; Transmembrane helix; Transport.	Involved in a multicomponent binding-protein-dependent transport system for glycine betain; probably responsible for the translocation of the substrate across the membrane; Belongs to the binding-protein-dependent transport system permease family. CysTW subfamily; Contains 1 ABC transmembrane type-1 domain.
20	POG_GCA_000264555.1_05766	PCHLO6_RS28535	E:COG4176	K02001	Bicarbonate transport system permease protein CmpB	Cell inner membrane; Cell membrane; Ion transport; Membrane; Transmembrane; Transmembrane helix; Transport.	Part of the ABC transporter complex CmpABCD involved in bicarbonate transport. Probably responsible for the translocation of the substrate across the membrane (Probable); Belongs to the binding-protein-dependent transport system permease family; Contains 1 ABC transmembrane type-1 domain.
20	POG_GCA_000264555.1_00597	PCHLO6_RS02970	E:COG4177	K01998	High-affinity branched-chain amino acid transport system permease protein BraE	Amino-acid transport; Cell inner membrane; Cell membrane; Membrane; Transmembrane; Transmembrane helix; Transport.	Component of the high affinity leucine, isoleucine, valine, transport system (LIV-I), which is operative without Na(+) and is specific for alanine and threonine, in addition to branched-chain amino acids. Belongs to the binding-protein-dependent transport system permease family. LivHM subfamily.
20	POG_GCA_000264555.1_01371	PCHLO6_RS06835	E:COG4177	K01998	High-affinity branched-chain amino acid transport system permease protein BraE	Amino-acid transport; Cell inner membrane; Cell membrane; Membrane; Transmembrane; Transmembrane helix; Transport.	Component of the high affinity leucine, isoleucine, valine, transport system (LIV-I), which is operative without Na(+) and is specific for alanine and threonine, in addition to branched-chain amino acids. Belongs to the binding-protein-dependent transport system permease family. LivHM subfamily.
20	POG_GCA_000264555.1_00630	PCHLO6_RS03135	E:COG4177	K11961	High-affinity branched-chain amino acid transport system permease protein LivM	Amino-acid transport; Cell inner membrane; Cell membrane; Membrane; Transmembrane; Transmembrane helix; Transport.	Part of the binding-protein-dependent transport system for branched-chain amino acids. Probably responsible for the translocation of the substrates across the membrane. Belongs to the binding-protein-dependent transport system permease family. LivHM subfamily.
17	POG_GCA_000264555.1_02649	PCHLO6_RS13145	E:COG4177	K01998	branched-chain amino acid transport system permease protein
20	POG_GCA_000264555.1_01337	PCHLO6_RS06670	E:COG4215	K10016	Putative glutamine transport system permease protein GlnP	Amino-acid transport; Cell inner membrane; Cell membrane; Membrane; Transmembrane; Transmembrane helix; Transport.	Part of the binding-protein-dependent transport system for glutamin; probably responsible for the translocation of the substrate across the membrane; Belongs to the binding-protein-dependent transport system permease family. HisMQ subfamily; Contains 1 ABC transmembrane type-1 domain.
20	POG_GCA_000264555.1_00350	PCHLO6_RS01745	E:COG4215	K02029	Nopaline transport system permease protein NocQ	Cell inner membrane; Cell membrane; Membrane; Plasmid; Transmembrane; Transmembrane helix; Transport.	Component of the nopaline active transport system probably consisting of four subunits: Q, M, P and T. This system is also capable of transporting octopine provided that catabolic functions are induced with nopaline. Belongs to the binding-protein-dependent transport system permease family. HisMQ subfamily; Contains 1 ABC transmembrane type-1 domain.
20	POG_GCA_000264555.1_04646	PCHLO6_RS22985	E:COG4215	K10024	Histidine transport system permease protein HisQ	Amino-acid transport; Cell inner membrane; Cell membrane; Membrane; Transmembrane; Transmembrane helix; Transport.	Part of the histidine permease ABC transporter. Also part of a lysine/arginine/ornithine transporter. Probably responsible for the translocation of the substrate across the membrane. Required to relay the ATPase-inducing signal from the solute-binding protein to HisP (By similarity); Belongs to the binding-protein-dependent transport system permease family. HisMQ subfamily; Contains 1 ABC transme…
20	POG_GCA_000264555.1_05507	eutC,PCHLO6_RS27245	E:COG4302	K03736	Ethanolamine ammonia-lyase	Cobalamin; Cobalt; Lyase.	Belongs to the EutC family.; KEGG: pfl:PFL_5474 ethanolamine ammonia-lyase small subunit
20	POG_GCA_000264555.1_05506	eutB,PCHLO6_RS27240	E:COG4303	K03735	Ethanolamine ammonia-lyase	Cobalt; Lyase.	KEGG: pman:OU5_4188 ethanolamine ammonia-lyase large subunit
20	POG_GCA_000264555.1_05735	soxD,PCHLO6_RS28380	E:COG4311	K00304	Sarcosine oxidase	Cytoplasm; Oxidoreductase.	KEGG: pge:LG71_22495 sarcosine oxidase, subunit delta
20	POG_GCA_000264555.1_04929	mtnX,PCHLO6_RS24385	E:COG4359	K08966	2-hydroxy-3-keto-5-methylthiopentenyl-1-phosphate phosphatase	Amino-acid biosynthesis; Hydrolase; Methionine biosynthesis.	Dephosphorylates 2-hydroxy-3-keto-5-methylthiopentenyl- 1-phosphate (HK-MTPenyl-1-P) yielding 1,2-dihydroxy-3-keto-5- methylthiopentene (DHK-MTPene); Belongs to the HAD-like hydrolase superfamily. MtnX family.; KEGG: eat:EAT1b_1437 2-hydroxy-3-keto-5-methylthiopentenyl-1-phosphate phosphatase
20	POG_GCA_000264555.1_01780	PCHLO6_RS08870	E:COG4413	K08717	Urea transporter 2	Alternative splicing; Cell membrane; Glycoprotein; Membrane; Phosphoprotein; Transmembrane; Transmembrane helix.	Specialized low-affinity vasopressin-regulated urea transporter. Mediates rapid transepithelial urea transport across the inner medullary collecting duct and plays a major role in the urinary concentrating mechanism. Vasopressin regulates urea transport by increasing isoform A1 accumulation in the plasma membrane and/or phosphorylation of isoform A1 (By similarity); Belongs to the urea transporte…
20	POG_GCA_000264555.1_05733	soxG,PCHLO6_RS28370	E:COG4583	K00305	Sarcosine oxidase	Cytoplasm; Oxidoreductase.	Catalyzes the oxidative demethylation of sarcosine to yield glycine, hydrogen peroxide and 5,10- methylenetetrahydrofolate.; KEGG: ppu:PP_0326 sarcosine oxidase, subunit gamma
19	POG_GCA_000264555.1_01044	PCHLO6_RS05200	E:COG4597	K09970	Putative amino-acid ABC transporter permease protein YhdX	Amino-acid transport; Cell inner membrane; Cell membrane; Membrane; Transmembrane; Transmembrane helix; Transport.	Probably part of the binding-protein-dependent transport system YdhWXYZ for an amino aci; probably responsible for the translocation of the substrate across the membrane. Belongs to the binding-protein-dependent transport system permease family. HisMQ subfamily; Contains 1 ABC transmembrane type-1 domain.
20	POG_GCA_000264555.1_00352	ABC.PA.A,PCHLO6_RS01755	E:COG4598	K02028	Polar-amino-acid-transporting ATPase	ATP-binding; Cell inner membrane; Cell membrane; Hydrolase; Membrane; Nucleotide-binding; Repeat; Sugar transport; Transport.	Part of the ABC transporter complex RbsABCD involved in ribose import. Responsible for energy coupling to the transport system; Belongs to the ABC transporter superfamily. Ribose importer (TC 3.A.1.2.1) family; Contains 2 ABC transporter domains.; KEGG: pae:PA5152 polar amino acid transport system ATP-binding protein
20	POG_GCA_000264555.1_01334	malK,mtlK,thuK,PCHLO6_RS06655	E:COG4598	K10111	Arginine/ornithine transport ATP-binding protein AotP	Amino-acid transport; ATP-binding; Cell inner membrane; Cell membrane; Membrane; Nucleotide-binding; Transport.	Part of the arginine-inducible binding-protein-dependent transport system for arginine and ornithine. Probably responsible for energy coupling to the transport system. Belongs to the ABC transporter superfamily; Contains 1 ABC transporter domain.; KEGG: xve:BJD12_07705 multiple sugar transport system ATP-binding protein; Acting on acid anhydrides; catalyzing transmembrane movement of substances
20	POG_GCA_000264555.1_04643	ABC.PA.A,PCHLO6_RS22970	E:COG4598	K02028	Polar-amino-acid-transporting ATPase	Amino-acid transport; ATP-binding; Cell inner membrane; Cell membrane; Membrane; Nucleotide-binding; Transport.	Part of the arginine-inducible binding-protein-dependent transport system for arginine and ornithine. Probably responsible for energy coupling to the transport system. Belongs to the ABC transporter superfamily; Contains 1 ABC transporter domain.; KEGG: rah:Rahaq_1856 polar amino acid transport system ATP-binding protein
20	POG_GCA_000264555.1_00876	PCHLO6_RS04360	E:COG4608	K12372	Macrolide export ATP-binding/permease protein MacB	Antibiotic resistance; ATP-binding; Cell inner membrane; Cell membrane; Hydrolase; Membrane; Nucleotide-binding; Transmembrane; Transmembrane helix; Transport.	Non-canonical ABC transporter that contains transmembrane domains (TMD), which form a pore in the inner membrane, and an ATP-binding domain (NBD), which is responsible for energy generation. Confers resistance against macrolides; Belongs to the ABC transporter superfamily. Macrolide exporter (TC 3.A.1.122) family; Contains 1 ABC transporter domain.
20	POG_GCA_000264555.1_00629	PCHLO6_RS03130	E:COG4674	K11962	Ribose import ATP-binding protein RbsA 1	ATP-binding; Cell inner membrane; Cell membrane; Hydrolase; Membrane; Nucleotide-binding; Repeat; Sugar transport; Transport.	Part of the ABC transporter complex RbsABCD involved in ribose import. Responsible for energy coupling to the transport system; Belongs to the ABC transporter superfamily. Ribose importer (TC 3.A.1.2.1) family; Contains 2 ABC transporter domains.
18	POG_GCA_000264555.1_05058	bioA,PCHLO6_RS25025	E:COG4992	K00833	Adenosylmethionine--8-amino-7-oxononanoate transaminase	Aminotransferase; Pyridoxal phosphate; Transferase.	Belongs to the class-III pyridoxal-phosphate-dependent aminotransferase family.; KEGG: bme:BMEII0778 adenosylmethionine---8-amino-7-oxononanoate aminotransferase
20	POG_GCA_000264555.1_05695	argD,PCHLO6_RS28180	E:COG4992	K00821	Acetylornithine transaminase	Amino-acid biosynthesis; Aminotransferase; Arginine biosynthesis; Mitochondrion; Pyridoxal phosphate; Transferase; Transit peptide.	Belongs to the class-III pyridoxal-phosphate-dependent aminotransferase family.; KEGG: pfo:Pfl01_5164 acetylornithine/N-succinyldiaminopimelate aminotransferase
20	POG_GCA_000264555.1_02503	argD,PCHLO6_RS12440	E:COG4992	K00821	Acetylornithine transaminase	Amino-acid biosynthesis; Aminotransferase; Arginine biosynthesis; Cytoplasm; Pyridoxal phosphate; Transferase.	Belongs to the class-III pyridoxal-phosphate-dependent aminotransferase family. ArgD subfamily.; KEGG: pch:EY04_11220 acetylornithine/N-succinyldiaminopimelate aminotransferase
20	POG_GCA_000264555.1_04641	astC,PCHLO6_RS22960	E:COG4992	K00840	Succinylornithine transaminase	Amino-acid biosynthesis; Aminotransferase; Arginine biosynthesis; Cytoplasm; Pyridoxal phosphate; Transferase.	Belongs to the class-III pyridoxal-phosphate-dependent aminotransferase family. ArgD subfamily.; KEGG: ppu:PP_4481 succinylornithine aminotransferase
17	POG_GCA_000264555.1_02650	PCHLO6_RS13150	E:ENOG410XPCZ	K01999	branched-chain amino acid transport system substrate-binding protein
20	POG_GCA_000264555.1_00418	pip,PCHLO6_RS02080	E:ENOG410XPKQ	K01259	Prolyl aminopeptidase	Aminopeptidase; Cytoplasm; Hydrolase; Protease.	May be involved in proline metabolism and sensitivity to ascamycin. Has ascamycin dealanylating activity. Belongs to the peptidase S33 family.; KEGG: xfa:XF_1510 proline iminopeptidase
19	POG_GCA_000264555.1_06216	PCHLO6_RS30770	E:ENOG410XQ2S	K02030	Probable ABC transporter arginine-binding protein ArtJ	Amino-acid transport; Secreted; Signal; Transport.	Probably part of an ABC transporter complex involved in arginine transport. Binds arginine. Interacts with host epithelial cells, suggesting a role in host-cell adhesion during infection; Belongs to the bacterial solute-binding protein 3 family.
20	POG_GCA_000264555.1_05736	soxB,PCHLO6_RS28385	E:ENOG410XQMM	K00303	Sarcosine oxidase	Cytoplasm; FAD; Flavoprotein; FMN; Oxidoreductase.	Catalyzes the oxidative demethylation of sarcosine to yield glycine, hydrogen peroxide and 5,10- methylenetetrahydrofolate; Belongs to the SoxB family.; KEGG: pge:LG71_22490 sarcosine oxidase, subunit beta
20	POG_GCA_000264555.1_00423	PCHLO6_RS02105	E:ENOG410XR35	K02029	Arginine transport system permease protein ArtQ	Amino-acid transport; Cell membrane; Membrane; Transmembrane; Transmembrane helix; Transport.	Part of a binding-protein-dependent transport system for arginine. Probably responsible for the translocation of the substrate across the membrane; Belongs to the binding-protein-dependent transport system permease family. HisMQ subfamily; Contains 1 ABC transmembrane type-1 domain.
19	POG_GCA_000264555.1_06217	PCHLO6_RS30775	E:ENOG410XR35	K02029	Histidine transport system permease protein HisM	Amino-acid transport; Cell inner membrane; Cell membrane; Membrane; Transmembrane; Transmembrane helix; Transport.	Part of the histidine permease ABC transporter. Also part of a lysine/arginine/ornithine transporter. Probably responsible for the translocation of the substrate across the membrane. Required to relay the ATPase-inducing signal from the solute-binding protein to HisP (By similarity); Belongs to the binding-protein-dependent transport system permease family. HisMQ subfamily; Contains 1 ABC transme…
20	POG_GCA_000264555.1_00422	PCHLO6_RS02100	E:ENOG410XSV7	K02030	ABC transporter arginine-binding protein	Amino-acid transport; Periplasm; Signal; Transport.	Part of the ABC transporter complex ArtPIQM involved in arginine transport; Belongs to the bacterial solute-binding protein 3 family.
20	POG_GCA_000264555.1_03402	PCHLO6_RS16840	E:ENOG410XT7D	K16238	ethanolamine permease
19	POG_GCA_000264555.1_03425	PCHLO6_RS16955	E:ENOG410XT7D	K03294	basic amino acid/polyamine antiporter, APA family
20	POG_GCA_000264555.1_05684	iaaM,PCHLO6_RS28125	E:ENOG410XZDR	K00466	Tryptophan 2-monooxygenase	Antibiotic; Antimicrobial; Apoptosis; Cytolysis; Disulfide bond; FAD; Flavoprotein; Glycoprotein; Hemolysis; Hemostasis impairing toxin; Oxidoreductase; Secreted; Signal; Toxin.	Catalyzes an oxidative deamination of predominantly hydrophobic and aromatic L-amino acids, thus producing hydrogen peroxide that may contribute to the diverse toxic effects of this enzyme. Exhibits diverse biological activities, such as hemorrhage, hemolysis, edema, apoptosis of vascular endothelial cells or tumor cell lines, antibacterial and antiparasitic activities, as well as regulation of p…
19	POG_GCA_000264555.1_03135	PCHLO6_RS15525	E:ENOG410Y38I	K02029	Putative glutamine transport system permease protein GlnP	Amino-acid transport; Cell inner membrane; Cell membrane; Membrane; Transmembrane; Transmembrane helix; Transport.	Part of the binding-protein-dependent transport system for glutamin; probably responsible for the translocation of the substrate across the membrane; Belongs to the binding-protein-dependent transport system permease family. HisMQ subfamily; Contains 1 ABC transmembrane type-1 domain.
18	POG_GCA_000264555.1_01792	GATM,PCHLO6_RS08930	E:ENOG410Y45M	K00613	Glycine amidinotransferase	Antibiotic biosynthesis; Streptomycin biosynthesis; Transferase.	Catalyzes two non-consecutive transamidination reactions. It converts scyllo-inosamine 4-phosphate into N- amidino-scyllo-inosamine 4-phosphate and N1-amidinostreptamine 6- phosphate into streptidine 6-phosphate (By similarity); Belongs to the amidinotransferase family.; KEGG: pch:EY04_08050 glycine amidinotransferase
20	POG_GCA_000264555.1_00351	PCHLO6_RS01750	E:ENOG410YVP9	K02030	Putative ABC transporter arginine-binding protein 2	Amino-acid transport; Periplasm; Signal; Transport.	Part of the ABC transporter complex ArtPIQMJ involved in arginine transport; Belongs to the bacterial solute-binding protein 3 family.
19	POG_GCA_000264555.1_03148	PCHLO6_RS15590	E:ENOG410ZT0Z	K02030	polar amino acid transport system substrate-binding protein
20	POG_GCA_000264555.1_01338	PCHLO6_RS06675	E:ENOG4110KSM	K10014	Histidine-binding periplasmic protein	Amino-acid transport; Disulfide bond; Periplasm; Signal; Transport.	Part of the histidine permease ABC transporter. Binds histidine. Interacts with HisQMP and stimulates ATPase activity of HisP, which results in histidine translocation (By similarity); Belongs to the bacterial solute-binding protein 3 family.
19	POG_GCA_000264555.1_02375	PCHLO6_RS11795	E:ENOG4111FH1	K05834	Homoserine/homoserine lactone efflux protein	Cell membrane; Membrane; Transmembrane; Transmembrane helix; Transport.	Conducts the efflux of homoserine and homoserine lactone; Belongs to the rht family.
20	POG_GCA_000264555.1_01933	PCHLO6_RS09620	E:ENOG4111MMZ	K02030	polar amino acid transport system substrate-binding protein
20	POG_GCA_000264555.1_05778	PCHLO6_RS28595	E:ENOG4111PW6	K02030	polar amino acid transport system substrate-binding protein
19	POG_GCA_000264555.1_02017	PCHLO6_RS10035	E:ENOG41127FZ	K02030	polar amino acid transport system substrate-binding protein
20	POG_GCA_000264555.1_05804	PCHLO6_RS28725	E:ENOG41128YN	K02030	polar amino acid transport system substrate-binding protein
20	POG_GCA_000264555.1_02013	PCHLO6_RS10015	EG:COG0697	K03298	Uncharacterized transporter YdfC	Cell membrane; Membrane; Repeat; Transmembrane; Transmembrane helix; Transport.	Belongs to the EamA transporter family; Contains 2 EamA domains.
20	POG_GCA_000264555.1_04452	PCHLO6_RS22020	EG:COG0697		Uncharacterized inner membrane transporter YhbE	Cell inner membrane; Cell membrane; Membrane; Repeat; Transmembrane; Transmembrane helix; Transport.	Belongs to the EamA transporter family; Contains 2 EamA domains.
20	POG_GCA_000264555.1_02641	PCHLO6_RS13105	EG:COG0697	K15268	O-acetylserine/cysteine efflux transporter
19	POG_GCA_000264555.1_01642	PCHLO6_RS08185	EG:COG0697	K03298	Uncharacterized transporter YoaV	Cell membrane; Membrane; Repeat; Transmembrane; Transmembrane helix; Transport.	Belongs to the EamA transporter family; Contains 2 EamA domains.
20	POG_GCA_000264555.1_02456	PCHLO6_RS12205	EG:COG0697	K15268	Uncharacterized transporter YdeK	Cell membrane; Membrane; Repeat; Transmembrane; Transmembrane helix; Transport.	Belongs to the EamA transporter family; Contains 2 EamA domains.
16	POG_GCA_000264555.1_01424	PCHLO6_RS07100	EG:COG0697		Uncharacterized transporter YdeK	Cell membrane; Membrane; Repeat; Transmembrane; Transmembrane helix; Transport.	Belongs to the EamA transporter family; Contains 2 EamA domains.
20	POG_GCA_000264555.1_01667	PCHLO6_RS08310	EG:COG0697	K05786	chloramphenicol-sensitive protein RarD
20	POG_GCA_000264555.1_01403	PCHLO6_RS06995	EG:COG0697	K15270	S-adenosylmethionine uptake transporter	Amino-acid transport; Cell inner membrane; Cell membrane; Membrane; Repeat; Transmembrane; Transmembrane helix; Transport.	Transports S-adenosylmethionine; Belongs to the drug/metabolite transporter (DMT) superfamily. 10 TMS drug/metabolite exporter (DME) (TC 2.A.7.3) family; Contains 2 EamA domains.
20	POG_GCA_000264555.1_01626	PCHLO6_RS08100	EG:COG0697		Uncharacterized membrane protein PA3474	Cell membrane; Membrane; Repeat; Transmembrane; Transmembrane helix.	Contains 2 EamA domains.
20	POG_GCA_000264555.1_03141	PCHLO6_RS15555	EG:COG0697	K12963	Probable 4-amino-4-deoxy-L-arabinose-phosphoundecaprenol flippase subunit ArnF	Cell inner membrane; Cell membrane; Lipid A biosynthesis; Lipid biosynthesis; Lipid metabolism; Lipopolysaccharide biosynthesis; Membrane; Transmembrane; Transmembrane helix; Transport.	Translocates 4-amino-4-deoxy-L-arabinose- phosphoundecaprenol (alpha-L-Ara4N-phosphoundecaprenol) from the cytoplasmic to the periplasmic side of the inner membrane; Belongs to the ArnF family.
20	POG_GCA_000264555.1_03142	PCHLO6_RS15560	EG:COG0697	K12962	Probable 4-amino-4-deoxy-L-arabinose-phosphoundecaprenol flippase subunit ArnE	Cell inner membrane; Cell membrane; Lipid A biosynthesis; Lipid biosynthesis; Lipid metabolism; Lipopolysaccharide biosynthesis; Membrane; Transmembrane; Transmembrane helix; Transport.	Translocates 4-amino-4-deoxy-L-arabinose- phosphoundecaprenol (alpha-L-Ara4N-phosphoundecaprenol) from the cytoplasmic to the periplasmic side of the inner membrane; Belongs to the ArnE family; Contains 1 EamA domain.
18	POG_GCA_000264555.1_02786	PCHLO6_RS13810	EG:COG2610	K16321	Inner membrane permease YgbN	Cell inner membrane; Cell membrane; Membrane; Transmembrane; Transmembrane helix; Transport.	Belongs to the GntP permease family.
20	POG_GCA_000264555.1_03822	PCHLO6_RS18915	EG:COG2610		Uncharacterized transporter YxjC	Cell membrane; Membrane; Transmembrane; Transmembrane helix; Transport.	Belongs to the CitM (TC 2.A.11) transporter family.
20	POG_GCA_000264555.1_04694	PCHLO6_RS23220	EG:COG2610	K03299	Gluconate permease	Cell inner membrane; Cell membrane; Gluconate utilization; Membrane; Sugar transport; Transmembrane; Transmembrane helix; Transport.	Belongs to the GntP permease family.
17	POG_GCA_000264555.1_02467	PCHLO6_RS12260	EG:COG2610	K13629	Gluconate permease	Cell membrane; Gluconate utilization; Membrane; Sugar transport; Transmembrane; Transmembrane helix; Transport.	Belongs to the GntP permease family.
20	POG_GCA_000264555.1_00772	,	EG:COG2610	K03299	High-affinity gluconate transporter	Cell inner membrane; Cell membrane; Gluconate utilization; Membrane; Sugar transport; Transmembrane; Transmembrane helix; Transport.	Part of the gluconate utilization system Gnt-; high- affinity intake of gluconate. Belongs to the GntP permease family.
20	POG_GCA_000264555.1_00877	PCHLO6_RS04365	EP:COG0444	K12371	Peptide transport system ATP-binding protein SapD	ATP-binding; Cell inner membrane; Cell membrane; Membrane; Nucleotide-binding; Peptide transport; Protein transport; Transport.	Involved in a peptide intake transport system that plays a role in the resistance to antimicrobial peptides; Belongs to the ABC transporter superfamily; Contains 1 ABC transporter domain.
20	POG_GCA_000264555.1_03397	dmpA,dap,PCHLO6_RS16815	EQ:COG3191	K01266	D-stereospecific aminopeptidase	Aminopeptidase; Hydrolase; Periplasm; Protease; Signal.	Beta-aminopeptidase that can cleave synthetic beta- peptides which consist of backbone-elongated beta-amino acid residues that are not processed by common proteolytic enzymes. Can cleave the beta-peptides beta-homoVal-beta-homoAla-beta-homoLeu and beta-homoAla-beta-homoLeu. Requires a beta-amino acid at the N-terminus of peptide substrates and cleaves the peptide bond between the N-terminal beta-…
20	POG_GCA_000264555.1_03991	purB,ADSL,PCHLO6_RS19720	F:COG0015	K01756	Adenylosuccinate lyase	Lyase; Purine biosynthesis.	Belongs to the lyase 1 family. Adenylosuccinate lyase subfamily.; KEGG: eco:b1131 adenylosuccinate lyase
20	POG_GCA_000264555.1_01394	pcaB,PCHLO6_RS06950	F:COG0015	K01857	3-carboxy-cis,cis-muconate cycloisomerase	Aromatic hydrocarbons catabolism; Cytoplasm; Isomerase.	Catalyzes an anti cycloisomerization. Belongs to the class-II fumarase/aspartase family.; KEGG: pch:EY04_06070 3-carboxy-cis,cis-muconate cycloisomerase
20	POG_GCA_000264555.1_06199	purK,PCHLO6_RS30685	F:COG0026	K01589	5-(carboxyamino)imidazole ribonucleotide synthase	ATP-binding; Ligase; Nucleotide-binding; Purine biosynthesis.	Catalyzes the ATP-dependent conversion of 5- aminoimidazole ribonucleotide (AIR) and HCO(3)(-) to N5- carboxyaminoimidazole ribonucleotide (N5-CAIR); Belongs to the PurK/PurT family; Contains 1 ATP-grasp domain.; KEGG: sml:Smlt1614 5-(carboxyamino)imidazole ribonucleotide synthase
20	POG_GCA_000264555.1_01085	purT,PCHLO6_RS05410	F:COG0027	K08289	Phosphoribosylglycinamide formyltransferase	ATP-binding; Magnesium; Metal-binding; Nucleotide-binding; Purine biosynthesis; Transferase.	Catalyzes two reactions: the first one is the production of beta-formyl glycinamide ribonucleotide (GAR) from formate, ATP and beta GA; the second, a side reaction, is the production of acetyl phosphate and ADP from acetate and ATP; Belongs to the PurK/PurT family; Contains 1 ATP-grasp domain.; KEGG: sml:Smlt1264 phosphoribosylglycinamide formyltransferase 2
20	POG_GCA_000264555.1_05172	upp,UPRT,PCHLO6_RS25590	F:COG0035	K00761	Uracil phosphoribosyltransferase	Allosteric enzyme; Glycosyltransferase; GTP-binding; Magnesium; Nucleotide-binding; Transferase.	Catalyzes the conversion of uracil and 5-phospho-alpha- D-ribose 1-diphosphate (PRPP) to UMP and diphosphate; Belongs to the UPRTase family.; KEGG: pre:PCA10_48120 uracil phosphoribosyltransferase
20	POG_GCA_000264555.1_06200	purE,PCHLO6_RS30690	F:COG0041	K01588	5-(carboxyamino)imidazole ribonucleotide mutase	Isomerase; Purine biosynthesis.	Catalyzes the conversion of N5-carboxyaminoimidazole ribonucleotide (N5-CAIR) to 4-carboxy-5-aminoimidazole ribonucleotide (CAIR); Belongs to the AIR carboxylase family. Class I subfamily.; KEGG: pae:PA5426 5-(carboxyamino)imidazole ribonucleotide mutase
20	POG_GCA_000264555.1_02564	DPYS,dht,hydA,PCHLO6_RS12735	F:COG0044	K01464	Dihydropyrimidinase	Hydrolase; Metal-binding; Zinc.	Catalyzes the hydrolysis of dihydropyrimidines and of the structurally related DL-5-mono-substituted hydantoins, to produce N-carbamoyl-D-amino acids; Belongs to the DHOase family. Hydantoinase/dihydropyrimidinase subfamily.; KEGG: pae:PA0441 dihydropyrimidinase
19	POG_GCA_000264555.1_06247	URA4,pyrC,PCHLO6_RS30915	F:COG0044	K01465	Dihydroorotase	Hydrolase; Metal-binding; Zinc.	Rather more predominant for the cleavage of aryl- than for alkyl-hydantoin derivatives. The stereoselectivity of this enzyme depends on the substrate used for bioconversion: strictly L-selective for the cleavage of D,L-5-indolylmethylhydantoin, but D-selective for the hydrolysis of D,L-methylthioethylhydantoin. Belongs to the DHOase family. Hydantoinase/dihydropyrimidinase subfamily.; KEGG: pshi:…
20	POG_GCA_000264555.1_05838	URA4,pyrC,PCHLO6_RS28900	F:COG0044	K01465	Dihydroorotase	Pyrimidine biosynthesis.	Non-functional DHOase; Belongs to the DHOase family. PyrC' subfamily.; KEGG: pae:PA0401 dihydroorotase
20	POG_GCA_000264555.1_01072	purL,PFAS,PCHLO6_RS05345	F:COG0046|F:COG0047	K01952	Phosphoribosylformylglycinamidine synthase	ATP-binding; Cytoplasm; Glutamine amidotransferase; Ligase; Magnesium; Metal-binding; Nucleotide-binding; Purine biosynthesis.	Phosphoribosylformylglycinamidine synthase involved in the purines biosynthetic pathway. Catalyzes the ATP-dependent conversion of formylglycinamide ribonucleotide (FGAR) and glutamine to yield formylglycinamidine ribonucleotide (FGAM) and glutamate; In the N-terminal sectio; belongs to the FGAMS family; Contains 1 glutamine amidotransferase type-1 domain.; KEGG: xpo:XPG1_1059 phosphoribosylformy…
20	POG_GCA_000264555.1_00567	purA,ADSS,PCHLO6_RS02825	F:COG0104	K01939	Adenylosuccinate synthase	Cytoplasm; GTP-binding; Ligase; Magnesium; Metal-binding; Nucleotide-binding; Purine biosynthesis.	Plays an important role in the de novo pathway of purine nucleotide biosynthesis. Catalyzes the first committed step in the biosynthesis of AMP from IMP; Belongs to the adenylosuccinate synthetase family.; KEGG: gqu:AWC35_09400 adenylosuccinate synthase
20	POG_GCA_000264555.1_04998	ndk,NME,PCHLO6_RS24730	F:COG0105	K00940	Nucleoside-diphosphate kinase	ATP-binding; Cytoplasm; Kinase; Magnesium; Metal-binding; Nucleotide metabolism; Nucleotide-binding; Phosphoprotein; Transferase.	Major role in the synthesis of nucleoside triphosphates other than ATP. The ATP gamma phosphate is transferred to the NDP beta phosphate via a ping-pong mechanism, using a phosphorylated active-site intermediate; Belongs to the NDK family.; KEGG: eco:b2518 nucleoside-diphosphate kinase
20	POG_GCA_000264555.1_01903	tmk,DTYMK,PCHLO6_RS09475	F:COG0125	K00943	dTMP kinase	ATP-binding; Kinase; Nucleotide biosynthesis; Nucleotide-binding; Transferase.	Phosphorylation of dTMP to form dTDP in both de novo and salvage pathways of dTTP synthesis; Belongs to the thymidylate kinase family.; KEGG: pae:PA2962 dTMP kinase
20	POG_GCA_000264555.1_05849	rdgB,PCHLO6_RS28955	F:COG0127	K02428	XTP/dITP diphosphatase	Hydrolase; Magnesium; Manganese; Metal-binding; Nucleotide metabolism; Nucleotide-binding.	Pyrophosphatase that hydrolyzes non-canonical purine nucleotides such as XTP and ITP/dITP to their respective monophosphate derivatives. Might exclude non-canonical purines from DNA precursor pool, thus preventing their incorporation into DNA and avoiding chromosomal lesions; Belongs to the HAM1 NTPase family.; KEGG: pfe:PSF113_5547 XTP/dITP diphosphohydrolase
20	POG_GCA_000264555.1_00655	purH,PCHLO6_RS03260	F:COG0138	K00602	Phosphoribosylaminoimidazolecarboxamide formyltransferase	Hydrolase; Multifunctional enzyme; Purine biosynthesis; Transferase.	Belongs to the PurH family.; KEGG: pae:PA4854 phosphoribosylaminoimidazolecarboxamide formyltransferase / IMP cyclohydrolase
20	POG_GCA_000264555.1_04567	purM,PCHLO6_RS22595	F:COG0150	K01933	Phosphoribosylformylglycinamidine cyclo-ligase	ATP-binding; Cytoplasm; Ligase; Nucleotide-binding; Purine biosynthesis.	Belongs to the AIR synthase family.; KEGG: pmy:Pmen_2996 phosphoribosylformylglycinamidine cyclo-ligase
20	POG_GCA_000264555.1_00654	purD,PCHLO6_RS03255	F:COG0151	K01945	Phosphoribosylamine--glycine ligase	ATP-binding; Ligase; Magnesium; Manganese; Metal-binding; Nucleotide-binding; Purine biosynthesis.	Belongs to the GARS family; Contains 1 ATP-grasp domain.; KEGG: wgl:WIGMOR_0245 phosphoribosylamine---glycine ligase
20	POG_GCA_000264555.1_01495	purC,PCHLO6_RS07450	F:COG0152	K01923	Phosphoribosylaminoimidazolesuccinocarboxamide synthase	ATP-binding; Ligase; Nucleotide-binding; Purine biosynthesis.	Belongs to the SAICAR synthetase family.; KEGG: wbr:purC phosphoribosylaminoimidazole-succinocarboxamide synthase
20	POG_GCA_000264555.1_01995	DHODH,pyrD,PCHLO6_RS09925	F:COG0167	K00254	Dihydroorotate dehydrogenase (quinone)	Cell membrane; Flavoprotein; FMN; Membrane; Oxidoreductase; Pyrimidine biosynthesis.	Catalyzes the conversion of dihydroorotate to orotate with quinone as electron acceptor; Belongs to the dihydroorotate dehydrogenase family. Type 2 subfamily.; KEGG: pae:PA3050 dihydroorotate dehydrogenase
20	POG_GCA_000264555.1_06140	gmk,PCHLO6_RS30385	F:COG0194	K00942	Guanylate kinase	ATP-binding; Cytoplasm; Kinase; Nucleotide-binding; Transferase.	Essential for recycling GMP and indirectly, cGMP; Belongs to the guanylate kinase family; Contains 1 guanylate kinase-like domain.; KEGG: ppu:PP_5296 guanylate kinase
20	POG_GCA_000264555.1_05892	thyA,TYMS,PCHLO6_RS29170	F:COG0207	K00560	Thymidylate synthase	Cytoplasm; Methyltransferase; Nucleotide biosynthesis; Transferase.	Provides the sole de novo source of dTMP for DNA biosynthesis; Belongs to the thymidylate synthase family. Bacterial- type ThyA subfamily.; KEGG: eco:b2827 thymidylate synthase
20	POG_GCA_000264555.1_04650	nrdB,nrdF,PCHLO6_RS23005	F:COG0208	K00526	Ribonucleoside-diphosphate reductase	DNA replication; Iron; Metal-binding; Oxidoreductase.	Provides the precursors necessary for DNA synthesis. Catalyzes the biosynthesis of deoxyribonucleotides from the corresponding ribonucleotides (By similarity); Belongs to the ribonucleoside diphosphate reductase small chain family.; KEGG: pae:PA1155 ribonucleoside-diphosphate reductase beta chain
20	POG_GCA_000264555.1_04600	nrdA,nrdE,PCHLO6_RS22755	F:COG0209	K00525	Ribonucleoside-diphosphate reductase	Allosteric enzyme; ATP-binding; Disulfide bond; DNA replication; Nucleotide-binding; Oxidoreductase; Repeat.	Provides the precursors necessary for DNA synthesis. Catalyzes the biosynthesis of deoxyribonucleotides from the corresponding ribonucleotides (By similarity); Belongs to the ribonucleoside diphosphate reductase large chain family; Contains 3 ATP-cone domains.; KEGG: pae:PA1156 ribonucleoside-diphosphate reductase alpha chain
20	POG_GCA_000264555.1_04355	dgt,PCHLO6_RS21530	F:COG0232	K01129	dGTPase	Hydrolase.	Belongs to the dGTPase family. Type 3 subfamily.; KEGG: pmy:Pmen_3004 dGTPase
20	POG_GCA_000264555.1_04432	cmk,PCHLO6_RS21920	F:COG0283	K00945	(d)CMP kinase	ATP-binding; Cytoplasm; Kinase; Nucleotide-binding; Transferase.	Belongs to the cytidylate kinase family. Type 1 subfamily.; KEGG: pst:PSPTO_1749 CMP/dCMP kinase
20	POG_GCA_000264555.1_01850	pyrF,PCHLO6_RS09215	F:COG0284	K01591	Orotidine-5'-phosphate decarboxylase	Decarboxylase; Lyase; Pyrimidine biosynthesis.	Catalyzes the decarboxylation of orotidine 5'- monophosphate (OMP) to uridine 5'-monophosphate (UMP); Belongs to the OMP decarboxylase family. Type 1 subfamily.; KEGG: pae:PA2876 orotidine-5'-phosphate decarboxylase
20	POG_GCA_000264555.1_04568	purN,PCHLO6_RS22600	F:COG0299	K11175	Phosphoribosylglycinamide formyltransferase	Purine biosynthesis; Transferase.	Catalyzes the transfer of a formyl group from 10- formyltetrahydrofolate to 5-phospho-ribosyl-glycinamide (GAR), producing 5-phospho-ribosyl-N-formylglycinamide (FGAR) and tetrahydrofolate; Belongs to the GART family.; KEGG: pcz:PCL1606_17400 phosphoribosylglycinamide formyltransferase 1
20	POG_GCA_000264555.1_00405	hutF,PCHLO6_RS02015	F:COG0402	K05603	Formimidoylglutamate deiminase	Hydrolase; Metal-binding; Zinc.	Catalyzes the deamination of 5-methylthioadenosine and S-adenosyl-L-homocysteine into 5-methylthioinosine and S-inosyl-L- homocysteine, respectively. Is also able to deaminate adenosine; Belongs to the MTA/SAH deaminase family.; KEGG: pre:PCA10_53130 formimidoylglutamate deiminase
20	POG_GCA_000264555.1_00715	PCHLO6_RS03555	F:COG0402	K18456	8-oxoguanine deaminase	Hydrolase; Metal-binding; Zinc.	Specifically deaminates 8-Oxoguanine (8-oxoG) to uric acid. 8-oxoG is formed via the oxidation of guanine within DNA by reactive oxygen species and leads, if uncorrected, to the incorporation of 8-oxoG:A mismatches and eventually to G:C to T:A transversions; Belongs to the ATZ/TRZ family.; KEGG: pmy:Pmen_3705 8-oxoguanine deaminase
20	POG_GCA_000264555.1_04439	mtaD,PCHLO6_RS21955	F:COG0402	K12960	S-methyl-5'-thioadenosine deaminase	Hydrolase; Metal-binding; Zinc.	Catalyzes the deamination of 5-methylthioadenosine and S-adenosyl-L-homocysteine into 5-methylthioinosine and S-inosyl-L- homocysteine, respectively. Is also able to deaminate adenosine; Belongs to the MTA/SAH deaminase family.; KEGG: pch:EY04_21900 5-methylthioadenosine/S-adenosylhomocysteine deaminase
20	POG_GCA_000264555.1_02002	guaD,PCHLO6_RS09960	F:COG0402	K01487	Guanine deaminase	Hydrolase; Metal-binding; Zinc.	Catalyzes the hydrolytic deamination of guanine, producing xanthine and ammonia. Belongs to the ATZ/TRZ family.; KEGG: ppu:PP_4281 guanine deaminase
20	POG_GCA_000264555.1_04114	codA,PCHLO6_RS20335	F:COG0402	K01485	Cytosine deaminase	Cytosine metabolism; Hydrolase; Iron; Metal-binding; Zinc.	Catalyzes the hydrolytic deamination of cytosine to uracil. Is involved in the pyrimidine salvage pathway, which allows the cell to utilize cytosine for pyrimidine nucleotide synthesis. Is also able to catalyze deamination of isoguanine, a mutagenic oxidation product of adenine in DNA, and of isocytosine. To a lesser extent, also catalyzes the conversion of 5- fluorocytosine (5FC) to 5-fluorourac…
20	POG_GCA_000264555.1_04902	URA4,pyrC,PCHLO6_RS24250	F:COG0418	K01465	Dihydroorotase	Hydrolase; Metal-binding; Pyrimidine biosynthesis; Zinc.	Belongs to the DHOase family. Type 1 subfamily.; KEGG: pae:PA3527 dihydroorotase
20	POG_GCA_000264555.1_00829	carB,CPA2,PCHLO6_RS04115	F:COG0458	K01955	Carbamoyl-phosphate synthase (glutamine-hydrolyzing)	Amino-acid biosynthesis; Arginine biosynthesis; ATP-binding; Ligase; Magnesium; Manganese; Metal-binding; Nucleotide-binding; Pyrimidine biosynthesis.	Belongs to the CarB family; Contains 1 ATP-grasp domain.; KEGG: eco:b0033 carbamoyl-phosphate synthase large subunit
20	POG_GCA_000264555.1_06135	pyrE,PCHLO6_RS30360	F:COG0461	K00762	Orotate phosphoribosyltransferase	Glycosyltransferase; Magnesium; Pyrimidine biosynthesis; Transferase.	Catalyzes the transfer of a ribosyl phosphate group from 5-phosphoribose 1-diphosphate to orotate, leading to the formation of orotidine monophosphate (OMP); Belongs to the purine/pyrimidine phosphoribosyltransferase family. PyrE subfamily.; KEGG: enr:H650_14550 orotate phosphoribosyltransferase
20	POG_GCA_000264555.1_05191	PRPS,prsA,PCHLO6_RS25685	F:COG0462	K00948	Ribose-phosphate diphosphokinase	ATP-binding; Cytoplasm; Kinase; Magnesium; Metal-binding; Nucleotide biosynthesis; Nucleotide-binding; Transferase.	Involved in the biosynthesis of ribose 1,5-bisphosphate. Catalyzes the transfer of pyrophosphoryl group from ATP to ribose- 5-phosphate to yield phosphoribosyl diphosphate (PRPP) and AMP; Belongs to the ribose-phosphate pyrophosphokinase family.; KEGG: xfa:XF_2644 ribose-phosphate pyrophosphokinase
20	POG_GCA_000264555.1_01196	surE,PCHLO6_RS05960	F:COG0496	K03787	5'-nucleotidase	Cytoplasm; Hydrolase; Metal-binding; Nucleotide-binding.	Nucleotidase that shows phosphatase activity on nucleoside 5'-monophosphates; Belongs to the SurE nucleotidase family.; KEGG: eco:b2744 5'-nucleotidase
20	POG_GCA_000264555.1_06111	xpt,PCHLO6_RS30240	F:COG0503	K03816	Xanthine phosphoribosyltransferase	Cytoplasm; Glycosyltransferase; Purine salvage; Transferase.	Converts the preformed base xanthine, a product of nucleic acid breakdown, to xanthosine 5'-monophosphate (XMP), so it can be reused for RNA or DNA synthesis; Belongs to the purine/pyrimidine phosphoribosyltransferase family. Xpt subfamily.; KEGG: ppu:PP_5265 xanthine phosphoribosyltransferase
20	POG_GCA_000264555.1_02023	APRT,apt,PCHLO6_RS10065	F:COG0503	K00759	Adenine phosphoribosyltransferase	Cytoplasm; Glycosyltransferase; Purine salvage; Transferase.	Catalyzes a salvage reaction resulting in the formation of AMP, that is energically less costly than de novo synthesis; Belongs to the purine/pyrimidine phosphoribosyltransferase family.; KEGG: pfl:PFL_1909 adenine phosphoribosyltransferase
20	POG_GCA_000264555.1_01186	pyrG,CTPS,PCHLO6_RS05910	F:COG0504	K01937	CTP synthase (glutamine hydrolyzing)	ATP-binding; Glutamine amidotransferase; Ligase; Nucleotide-binding; Pyrimidine biosynthesis.	Catalyzes the ATP-dependent amination of UTP to CTP with either L-glutamine or ammonia as the source of nitrogen; Belongs to the CTP synthase family; Contains 1 glutamine amidotransferase type-1 domain.; KEGG: sbw:TGUWTKB_3070 CTP synthase
20	POG_GCA_000264555.1_04664	pyrG,CTPS,PCHLO6_RS23075	F:COG0504	K01937	CTP synthase (glutamine hydrolyzing)	ATP-binding; Glutamine amidotransferase; Ligase; Nucleotide-binding; Pyrimidine biosynthesis.	Catalyzes the ATP-dependent amination of UTP to CTP with either L-glutamine or ammonia as the source of nitrogen; Belongs to the CTP synthase family; Contains 1 glutamine amidotransferase type-1 domain.; KEGG: ent:Ent638_1664 CTP synthase
20	POG_GCA_000264555.1_00828	carA,CPA1,PCHLO6_RS04110	F:COG0505	K01956	Carbamoyl-phosphate synthase (glutamine-hydrolyzing)	Amino-acid biosynthesis; Arginine biosynthesis; ATP-binding; Glutamine amidotransferase; Ligase; Nucleotide-binding; Pyrimidine biosynthesis.	Belongs to the CarA family; Contains 1 glutamine amidotransferase type-1 domain.; KEGG: pae:PA4758 carbamoyl-phosphate synthase small subunit
20	POG_GCA_000264555.1_04980	IMPDH,guaB,PCHLO6_RS24640	F:COG0516|S:COG0517	K00088	IMP dehydrogenase	CBS domain; GMP biosynthesis; Metal-binding; NAD; Oxidoreductase; Potassium; Purine biosynthesis; Repeat.	Catalyzes the conversion of inosine 5'-phosphate (IMP) to xanthosine 5'-phosphate (XMP), the first committed and rate- limiting step in the de novo synthesis of guanine nucleotides, and therefore plays an important role in the regulation of cell growth; Belongs to the IMPDH/GMPR family; Contains 2 CBS domains.; KEGG: yro:CH64_1454 IMP dehydrogenase
20	POG_GCA_000264555.1_01946	guaA,GMPS,PCHLO6_RS09685	F:COG0518	K01951	GMP synthase (glutamine-hydrolyzing)	ATP-binding; Glutamine amidotransferase; GMP biosynthesis; Ligase; Nucleotide-binding; Purine biosynthesis.	Catalyzes the synthesis of GMP from XMP; Contains 1 glutamine amidotransferase type-1 domain; Contains 1 GMPS ATP-PPase (ATP pyrophosphatase) domain.; KEGG: pen:PSEEN1544 GMP synthase (glutamine-hydrolysing)
20	POG_GCA_000264555.1_04979	guaA,GMPS,PCHLO6_RS24635	F:COG0518|F:COG0519	K01951	GMP synthase (glutamine-hydrolyzing)	ATP-binding; Glutamine amidotransferase; GMP biosynthesis; Ligase; Nucleotide-binding; Purine biosynthesis.	Catalyzes the synthesis of GMP from XMP; Contains 1 glutamine amidotransferase type-1 domain; Contains 1 GMPS ATP-PPase (ATP pyrophosphatase) domain.; KEGG: ppu:PP_1032 GMP synthase (glutamine-hydrolysing)
20	POG_GCA_000264555.1_01170	pyrH,PCHLO6_RS05830	F:COG0528	K09903	UMP kinase	ATP-binding; Cytoplasm; Kinase; Nucleotide-binding; Pyrimidine biosynthesis; Transferase.	Catalyzes the reversible phosphorylation of UMP to UDP; Belongs to the UMP kinase family.; KEGG: ppw:PputW619_4080 uridylate kinase
20	POG_GCA_000264555.1_05837	pyrB,PYR2,PCHLO6_RS28895	F:COG0540	K00609	Aspartate carbamoyltransferase	Pyrimidine biosynthesis; Transferase.	Belongs to the ATCase/OTCase family.; KEGG: ppu:PP_4998 aspartate carbamoyltransferase catalytic subunit
20	POG_GCA_000264555.1_01140	adk,AK,PCHLO6_RS05680	F:COG0563	K00939	Adenylate kinase	ATP-binding; Chloroplast; Kinase; Nucleotide-binding; Plastid; Transferase; Transit peptide.	Catalyzes the reversible transfer of the terminal phosphate group between ATP and AMP. Plays an important role in cellular energy homeostasis and in adenine nucleotide metabolism. Plays a major role in the equilibration of adenylates and de novo synthesis of ADP in the plastid stroma; Belongs to the adenylate kinase family.; KEGG: eco:b0474 adenylate kinase
20	POG_GCA_000264555.1_04657	PCHLO6_RS23040	F:COG0563		Uncharacterized protein YqaC	Signal.
20	POG_GCA_000264555.1_05171	hprT,hpt,HPRT1,PCHLO6_RS25585	F:COG0634	K00760	Hypoxanthine phosphoribosyltransferase	Cytoplasm; Glycosyltransferase; Magnesium; Metal-binding; Nucleotide-binding; Purine salvage; Transferase.	Essential in nucleic acid metabolism of T.foetus because the parasite is unable to synthesize purine nucleotides de novo and relies on the HGXPRTase activities for its purine requirements by salvaging purine bases from the host. Works with guanine, hypoxanthine and xanthine. Belongs to the purine/pyrimidine phosphoribosyltransferase family.; KEGG: pmy:Pmen_0947 hypoxanthine phosphoribosyltransfer…
20	POG_GCA_000264555.1_01332	dcd,PCHLO6_RS06645	F:COG0717	K01494	dCTP deaminase	Hydrolase; Nucleotide metabolism.	Belongs to the dCTP deaminase family.; KEGG: xal:XALC_0969 dCTP deaminase
20	POG_GCA_000264555.1_06132	dut,DUT,PCHLO6_RS30345	F:COG0756	K01520	dUTP diphosphatase	Hydrolase; Magnesium; Metal-binding; Nucleotide metabolism.	This enzyme is involved in nucleotide metabolism: it produces dUMP, the immediate precursor of thymidine nucleotides and it decreases the intracellular concentration of dUTP so that uracil cannot be incorporated into DNA; Belongs to the dUTPase family.; KEGG: srh:BAY15_0498 dUTP pyrophosphatase
20	POG_GCA_000264555.1_05458	amn,PCHLO6_RS27005	F:COG0775	K01241	AMP nucleosidase	Hydrolase.	Catalyzes the hydrolysis of the N-glycosidic bond of AMP to form adenine and ribose 5-phosphate. Involved in regulation of AMP concentrations; Belongs to the AMP nucleosidase family.; KEGG: ppg:PputGB1_4833 AMP nucleosidase
20	POG_GCA_000264555.1_05732	purU,PCHLO6_RS28365	F:COG0788	K01433	Formyltetrahydrofolate deformylase	Hydrolase; One-carbon metabolism; Purine biosynthesis.	Catalyzes the hydrolysis of 10-formyltetrahydrofolate (formyl-FH4) to formate and tetrahydrofolate (FH4); Belongs to the PurU family; Contains 1 ACT domain.; KEGG: ppu:PP_0327 formyltetrahydrofolate deformylase
20	POG_GCA_000264555.1_04831	purU,PCHLO6_RS23895	F:COG0788	K01433	Formyltetrahydrofolate deformylase	Hydrolase; One-carbon metabolism; Purine biosynthesis.	Catalyzes the hydrolysis of 10-formyltetrahydrofolate (formyl-FH4) to formate and tetrahydrofolate (FH4); Belongs to the PurU family; Contains 1 ACT domain.; KEGG: pae:PA4314 formyltetrahydrofolate deformylase
20	POG_GCA_000264555.1_01080	nudF,PCHLO6_RS05385	F:COG1051	K01515	ADP-ribose diphosphatase	Chloroplast; FAD; Flavoprotein; FMN; Hydrolase; Magnesium; Manganese; Metal-binding; Plastid; Transit peptide.	Mediates the hydrolysis of some nucleoside diphosphate derivatives. Can use FAD and ADP-ribose as substrates; Belongs to the Nudix hydrolase family; Contains 1 nudix hydrolase domain.; KEGG: psp:PSPPH_2562 ADP-ribose pyrophosphatase
20	POG_GCA_000264555.1_01914	PCHLO6_RS09525	F:COG1457	K03457	nucleobase:cation symporter-1, NCS1 family
20	POG_GCA_000264555.1_00409	PCHLO6_RS02035	F:COG1457	K03457	Putative purine-cytosine permease YxlA	Cell membrane; Membrane; Transmembrane; Transmembrane helix; Transport.	Belongs to the purine-cytosine permease (2.A.39) family.
19	POG_GCA_000264555.1_00535	,	F:COG1457	K03457	nucleobase:cation symporter-1, NCS1 family
20	POG_GCA_000264555.1_04113	PCHLO6_RS20330	F:COG1457	K10974	Cytosine permease	Cell inner membrane; Cell membrane; Cytosine metabolism; Membrane; Transmembrane; Transmembrane helix; Transport.	Required for cytosine transport into the cell. Belongs to the purine-cytosine permease (2.A.39) family.
20	POG_GCA_000264555.1_00711	ade,PCHLO6_RS03530	F:COG1816	K21053	Adenine deaminase	Hydrolase; Metal-binding; Nucleotide metabolism; Zinc.	Catalyzes the hydrolytic deamination of adenine to hypoxanthine. Plays an important role in the purine salvage pathway and in nitrogen catabolism; Belongs to the adenosine and AMP deaminases family. Adenine deaminase type 2 subfamily.; KEGG: pae:PA0148 adenine deaminase
20	POG_GCA_000264555.1_02250	iunH,PCHLO6_RS11195	F:COG1957	K01239	Purine nucleosidase	Glycosidase; Hydrolase.	Hydrolyzes cytidine or uridine to ribose and cytosine or uracil, respectively; Belongs to the IUNH family. RihA subfamily.; KEGG: pch:EY04_09935 purine nucleosidase
20	POG_GCA_000264555.1_05836	pyrR,PCHLO6_RS28890	F:COG2065	K02825	Uracil phosphoribosyltransferase	Glycosyltransferase; Transcription; Transcription regulation; Transferase.	Regulates the transcription of the pyrimidine nucleotide (pyr) operon in response to exogenous pyrimidines; Also displays a weak uracil phosphoribosyltransferase activity which is not physiologically significant; Belongs to the purine/pyrimidine phosphoribosyltransferase family. PyrR subfamily.; KEGG: pae:PA0403 pyrimidine operon attenuation protein / uracil phosphoribosyltransferase
20	POG_GCA_000264555.1_02187	PCHLO6_RS10885	F:COG2233	K03458	Putative purine permease CPE0397	Cell membrane; Membrane; Transmembrane; Transmembrane helix; Transport.	Belongs to the xanthine/uracil permease family. Nucleobase:cation symporter-2 (NCS2) (TC 2.A.40) subfamily.
20	POG_GCA_000264555.1_03014	PCHLO6_RS14935	F:COG2233	K16345	Xanthine permease XanP	Cell inner membrane; Cell membrane; Membrane; Transmembrane; Transmembrane helix; Transport.	Specific, proton motive force-dependent high-affinity transporter for xanthine; Belongs to the xanthine/uracil permease family. Nucleobase:cation symporter-2 (NCS2) (TC 2.A.40) subfamily.
20	POG_GCA_000264555.1_04495	PCHLO6_RS22240	F:COG2233	K03458	Uric acid permease PucK	Cell membrane; Membrane; Transmembrane; Transmembrane helix; Transport.	Uptake of uric acid; Belongs to the xanthine/uracil permease family. Nucleobase:cation symporter-2 (NCS2) (TC 2.A.40) subfamily.
20	POG_GCA_000264555.1_05173	PCHLO6_RS25595	F:COG2233	K02824	Probable uracil permease	Cell inner membrane; Cell membrane; Membrane; Transmembrane; Transmembrane helix; Transport.	Transport of uracil in the cell; Belongs to the xanthine/uracil permease family. Nucleobase:cation symporter-2 (NCS2) (TC 2.A.40) subfamily.
20	POG_GCA_000264555.1_06002	cyaA,PCHLO6_RS29715	F:COG3072	K05851	Adenylate cyclase	ATP-binding; cAMP biosynthesis; Cytoplasm; Lyase; Nucleotide-binding.	Belongs to the adenylyl cyclase class-1 family.; KEGG: pfo:Pfl01_5493 adenylate cyclase, class 1
20	POG_GCA_000264555.1_04493	allA,PCHLO6_RS22230	F:COG3194	K01483	Ureidoglycolate lyase	Lyase; Purine metabolism.	Catalyzes the catabolism of the allantoin degradation intermediate (S)-ureidoglycolate, generating urea and glyoxylate. Involved in the utilization of allantoin as nitrogen source; Belongs to the ureidoglycolate lyase family.; KEGG: ppu:PP_4288 ureidoglycolate lyase
18	POG_GCA_000264555.1_04109	PCHLO6_RS20310	F:COG3613	K08728	Nucleoside deoxyribosyltransferase		KEGG: reh:H16_A0680 nucleoside deoxyribosyltransferase
19	POG_GCA_000264555.1_04492	alc,ALLC,PCHLO6_RS22225	F:COG4266	K01477	Allantoicase	Hydrolase; Purine metabolism.	Belongs to the allantoicase family.; KEGG: pfo:Pfl01_1704 allantoicase
20	POG_GCA_000264555.1_02005	xdhA,PCHLO6_RS09975	F:COG4630	K13481	Xanthine dehydrogenase	2Fe-2S; FAD; Flavoprotein; Iron; Iron-sulfur; Metal-binding; Molybdenum; NAD; Oxidoreductase; Peroxisome.	Key enzyme in purine degradation. Catalyzes the oxidation of hypoxanthine to xanthine. Catalyzes the oxidation of xanthine to uric acid (By similarity); Belongs to the xanthine dehydrogenase family; Contains 1 2Fe-2S ferredoxin-type domain; Contains 1 FAD-binding PCMH-type domain.; KEGG: pge:LG71_16625 xanthine dehydrogenase small subunit
19	POG_GCA_000264555.1_04137	nicA,PCHLO6_RS20450	F:COG4630	K18029	Nicotinate dehydrogenase (cytochrome)	2Fe-2S; Cytoplasm; FAD; Flavoprotein; Iron; Iron-sulfur; Metal-binding; Molybdenum; Oxidoreductase; Phosphoprotein; Polymorphism.	Oxidase with broad substrate specificity, oxidizing aromatic azaheterocycles, such as N1-methylnicotinamide and N- methylphthalazinium, as well as aldehydes, such as benzaldehyde, retinal, pyridoxal, and vanillin. Plays a role in the metabolism of xenobiotics and drugs containing aromatic azaheterocyclic substituents. Participates in the bioactivation of prodrugs such as famciclovir, catalyzing t…
20	POG_GCA_000264555.1_02004	xdhB,PCHLO6_RS09970	F:COG4631	K13482	Xanthine dehydrogenase	2Fe-2S; Cytoplasm; FAD; Flavoprotein; Iron; Iron-sulfur; Metal-binding; Molybdenum; Oxidoreductase; Phosphoprotein.	Oxidase with broad substrate specificity, oxidizing aromatic azaheterocycles, such as N1-methylnicotinamide and phthalazine, as well as aldehydes, such as benzaldehyde, retinal and pyridoxal. Plays a key role in the metabolism of xenobiotics and drugs containing aromatic azaheterocyclic substituents. Is probably involved in the regulation of reactive oxygen species homeostasis. May be a prominent…
20	POG_GCA_000264555.1_02346	PCHLO6_RS11655	F:COG5042		Probable purine nucleoside permease C285.05	Endoplasmic reticulum; Signal; Transport.	Probable nucleoside permease that transports adenosine and guanosine; Belongs to the NUP family.
20	POG_GCA_000264555.1_04389	PCHLO6_RS21705	F:ENOG410XPRD	K01081	5'-nucleotidase	Cytoplasm; Hydrolase; Magnesium; Nucleotide metabolism; Nucleotide-binding.	Dephosphorylates the 5' and 2'(3')-phosphates of deoxyribonucleotides and has a broad substrate specificity. Helps to regulate adenosine levels in heart during ischemia and hypoxia; Belongs to the 5'-nucleotidase type 3 family.; KEGG: pfl:PFL_4270 5'-nucleotidase
20	POG_GCA_000264555.1_00537	nudF,PCHLO6_RS02675	F:ENOG410ZYVG	K01515	ADP-ribose diphosphatase	Hydrolase; Magnesium; Metal-binding.	Acts on ADP-mannose and ADP-glucose as well as ADP- ribose. Prevents glycogen biosynthesis. The reaction catalyzed by this enzyme is a limiting step of the gluconeogenic process (By similarity); Belongs to the Nudix hydrolase family. NudF subfamily; Contains 1 nudix hydrolase domain.; KEGG: pfl:PFL_0541 ADP-ribose pyrophosphatase
19	POG_GCA_000264555.1_05053	PCHLO6_RS25000	FG:COG0537	K02503	Histidine triad nucleotide-binding protein	Cytoplasm; Hydrolase; Nucleotide-binding; Nucleus.	Hydrolyzes purine nucleotide phosphoramidates with a single phosphate group, including adenosine 5'monophosphoramidate (AMP-NH2), adenosine 5'monophosphomorpholidate (AMP-morpholidate) and guanosine 5'monophosphomorpholidate (GMP-morpholidate). Hydrolyzes lysyl-AMP (AMP-N-epsilon-(N-alpha-acetyl lysine methyl ester)) generated by lysine tRNA ligase, as well as Met-AMP, His- AMP and Asp-AMP, lysyl…
20	POG_GCA_000264555.1_04813	PCHLO6_RS23805	FG:COG0537	K01061	Carboxymethylenebutenolidase		KEGG: xba:C7S18_18470 carboxymethylenebutenolidase
20	POG_GCA_000264555.1_05638	PCHLO6_RS27895	FG:COG0537	K02503	Uncharacterized HIT-like protein TC_0664		Contains 1 HIT domain.
20	POG_GCA_000264555.1_01964	PCHLO6_RS09775	FH:COG1953	K03457	Probable allantoin permease	Cell membrane; Membrane; Transmembrane; Transmembrane helix; Transport.	Transport of allantoin; Belongs to the purine-cytosine permease (2.A.39) family.
20	POG_GCA_000264555.1_02565	PCHLO6_RS12740	FH:COG1953	K03457	Uncharacterized protein in hyuC 3'region	Cell inner membrane; Cell membrane; Membrane; Plasmid; Transmembrane; Transmembrane helix; Transport.	Belongs to the purine-cytosine permease (2.A.39) family.
20	POG_GCA_000264555.1_04969	tadA,PCHLO6_RS24585	FJ:COG0590	K11991	tRNA(adenine(34)) deaminase	Hydrolase; Metal-binding; tRNA processing; Zinc.	Catalyzes the deamination of adenosine to inosine at the wobble position 34 of tRNA(Arg2); Belongs to the cytidine and deoxycytidylate deaminase family; Contains 1 CMP/dCMP-type deaminase domain.; KEGG: pfv:Psefu_1389 tRNA(adenine34) deaminase
20	POG_GCA_000264555.1_00241	tadA,PCHLO6_RS01210	FJ:COG0590	K11991	tRNA(adenine(34)) deaminase	Hydrolase; Metal-binding; Purine metabolism; Zinc.	Catalyzes the hydrolytic deamination of guanine, producing xanthine and ammonia; Belongs to the cytidine and deoxycytidylate deaminase family; Contains 1 CMP/dCMP-type deaminase domain.; KEGG: sbw:TGUWTKB_3100 tRNA(adenine34) deaminase
20	POG_GCA_000264555.1_02673	miaE,PCHLO6_RS13260	FJ:COG4445	K06169	tRNA-(ms[2]io[6]A)-hydroxylase	Oxidoreductase; tRNA processing.	KEGG: pre:PCA10_36930 tRNA-(ms(2)io(6)A)-hydroxylase; Oxidoreductases
20	POG_GCA_000264555.1_05977	ppx-gppA,PCHLO6_RS29585	FP:COG0248	K01524	Exopolyphosphatase	Hydrolase.	Conversion of pppGpp to ppGpp. Guanosine pentaphosphate (pppGpp) is a cytoplasmic signaling molecule which together with ppGpp controls the "stringent response", an adaptive process that allows bacteria to respond to amino acid starvation, resulting in the coordinated regulation of numerous cellular activities; Belongs to the GppA/Ppx family. GppA subfamily.; KEGG: pfl:PFL_5983 exopolyphosphatase…
18	POG_GCA_000264555.1_02363	ppx-gppA,PCHLO6_RS11740	FP:COG0248	K01524	Exopolyphosphatase	Hydrolase.	Conversion of pppGpp to ppGpp. Guanosine pentaphosphate (pppGpp) is a cytoplasmic signaling molecule which together with ppGpp controls the "stringent response", an adaptive process that allows bacteria to respond to amino acid starvation, resulting in the coordinated regulation of numerous cellular activities; Belongs to the GppA/Ppx family. GppA subfamily.; KEGG: pman:OU5_1048 exopolyphosphatas…
20	POG_GCA_000264555.1_05789	tktA,tktB,PCHLO6_RS28650	G:COG0021	K00615	Transketolase	Acetylation; Calcium; Magnesium; Metal-binding; Thiamine pyrophosphate; Transferase.	Catalyzes the reversible transfer of a two-carbon ketol group from sedoheptulose-7-phosphate to glyceraldehyde-3- phosphate, producing xylulose-5-phosphate and ribose-5-phosphate. Catalyzes the transfer of a two-carbon ketol group from a ketose donor to an aldose acceptor, via a covalent intermediate with the cofactor thiamine pyrophosphate; Belongs to the transketolase family.; KEGG: men:MEPCIT_…
20	POG_GCA_000264555.1_03417	pgm,PCHLO6_RS16915	G:COG0033	K01835	Phosphoglucomutase (alpha-D-glucose-1,6-bisphosphate-dependent)	Carbohydrate metabolism; Glucose metabolism; Isomerase; Magnesium; Metal-binding; Phosphoprotein.	This enzyme participates in both the breakdown and synthesis of glucose. Belongs to the phosphohexose mutase family.; KEGG: ppu:PP_3578 phosphoglucomutase
20	POG_GCA_000264555.1_05649	rpe,RPE,PCHLO6_RS27950	G:COG0036	K01783	Ribulose-phosphate 3-epimerase	Carbohydrate metabolism; Cobalt; Iron; Isomerase; Manganese; Metal-binding; Zinc.	Catalyzes the reversible epimerization of D-ribulose 5- phosphate to D-xylulose 5-phosphate; Belongs to the ribulose-phosphate 3-epimerase family.; KEGG: pae:PA0607 ribulose-phosphate 3-epimerase
20	POG_GCA_000264555.1_02069	GAPDH,gapA,PCHLO6_RS10295	G:COG0057	K00134	Glyceraldehyde-3-phosphate dehydrogenase (phosphorylating)	NAD; Oxidoreductase; Phosphoprotein.	Belongs to the glyceraldehyde-3-phosphate dehydrogenase family.; KEGG: ppu:PP_2149 glyceraldehyde 3-phosphate dehydrogenase
20	POG_GCA_000264555.1_05788	epd,PCHLO6_RS28645	G:COG0057	K03472	Erythrose-4-phosphate dehydrogenase	Cytoplasm; NAD; Oxidoreductase; Pyridoxine biosynthesis.	Catalyzes the NAD-dependent conversion of D-erythrose 4- phosphate to 4-phosphoerythronate; Belongs to the glyceraldehyde-3-phosphate dehydrogenase family. Epd subfamily.; KEGG: pst:PSPTO_0386 D-erythrose 4-phosphate dehydrogenase
20	POG_GCA_000264555.1_04739	epd,PCHLO6_RS23435	G:COG0057	K03472	Erythrose-4-phosphate dehydrogenase	Cytoplasm; NAD; Oxidoreductase; Pyridoxine biosynthesis.	Catalyzes the NAD-dependent conversion of D-erythrose 4- phosphate to 4-phosphoerythronate; Belongs to the glyceraldehyde-3-phosphate dehydrogenase family. Epd subfamily.; KEGG: eco:b2927 D-erythrose 4-phosphate dehydrogenase
20	POG_GCA_000264555.1_00397	PYG,glgP,PCHLO6_RS01975	G:COG0058	K00688	Glycogen phosphorylase	Allosteric enzyme; Carbohydrate metabolism; Glycogen metabolism; Glycosyltransferase; Pyridoxal phosphate; Transferase.	Phosphorylase is an important allosteric enzyme in carbohydrate metabolism. Enzymes from different sources differ in their regulatory mechanisms and in their natural substrates. However, all known phosphorylases share catalytic and structural properties (By similarity); Belongs to the glycogen phosphorylase family.; KEGG: pch:EY04_01320 glycogen phosphorylase
20	POG_GCA_000264555.1_02873	ppnK,NADK,PCHLO6_RS14250	G:COG0061	K00858	NAD(+) kinase	ATP-binding; Cytoplasm; Kinase; NAD; NADP; Nucleotide-binding; Transferase.	Involved in the regulation of the intracellular balance of NAD and NADP, and is a key enzyme in the biosynthesis of NADP. Catalyzes specifically the phosphorylation on 2'-hydroxyl of the adenosine moiety of NAD to yield NADP; Belongs to the NAD kinase family.; KEGG: pmy:Pmen_2944 NAD+ kinase
20	POG_GCA_000264555.1_00557	nnr,PCHLO6_RS02775	G:COG0063	K17758	ADP-dependent NAD(P)H-hydrate dehydratase	ATP-binding; Lyase; NAD; NADP; Nucleotide-binding.	Catalyzes the dehydration of the S-form of NAD(P)HX at the expense of ADP, which is converted to AMP. Together with NAD(P)HX epimerase, which catalyzes the epimerization of the S- and R-forms, the enzyme allows the repair of both epimers of NAD(P)HX, a damaged form of NAD(P)H that is a result of enzymatic or heat-dependent hydration; Belongs to the NnrD/CARKD family; Contains 1 YjeF C-terminal do…
20	POG_GCA_000264555.1_05901	rpiA,PCHLO6_RS29215	G:COG0120	K01807	Ribose-5-phosphate isomerase	Isomerase.	Catalyzes the reversible conversion of ribose-5- phosphate to ribulose 5-phosphate; Belongs to the ribose 5-phosphate isomerase family.; KEGG: pae:PA0330 ribose 5-phosphate isomerase A
20	POG_GCA_000264555.1_05787	PGK,pgk,PCHLO6_RS28640	G:COG0126	K00927	Phosphoglycerate kinase	ATP-binding; Cytoplasm; Glycolysis; Kinase; Nucleotide-binding; Transferase.	Belongs to the phosphoglycerate kinase family.; KEGG: eco:b2926 phosphoglycerate kinase
20	POG_GCA_000264555.1_01188	ENO,eno,PCHLO6_RS05920	G:COG0148	K01689	Phosphopyruvate hydratase	Cytoplasm; Glycolysis; Lyase; Magnesium; Metal-binding; Secreted.	Catalyzes the reversible conversion of 2- phosphoglycerate into phosphoenolpyruvate. It is essential for the degradation of carbohydrates via glycolysis; Belongs to the enolase family.; KEGG: psa:PST_1557 enolase
20	POG_GCA_000264555.1_00837	TPI,tpiA,PCHLO6_RS04155	G:COG0149	K01803	Triose-phosphate isomerase	Cytoplasm; Gluconeogenesis; Glycolysis; Isomerase; Pentose shunt.	Belongs to the triosephosphate isomerase family.; KEGG: pae:PA4748 triosephosphate isomerase (TIM)
20	POG_GCA_000264555.1_00398	FBP,fbp,PCHLO6_RS01980	G:COG0158	K03841	Fructose-bisphosphatase	Carbohydrate metabolism; Cytoplasm; Hydrolase; Magnesium; Metal-binding.	Belongs to the FBPase class 1 family.; KEGG: pae:PA5110 fructose-1,6-bisphosphatase I
20	POG_GCA_000264555.1_05313	GPI,pgi,PCHLO6_RS26290	G:COG0166	K01810	Glucose-6-phosphate isomerase	Cytoplasm; Gluconeogenesis; Glycolysis; Isomerase.	Belongs to the GPI family.; KEGG: ppu:PP_1808 glucose-6-phosphate isomerase
20	POG_GCA_000264555.1_02088	talA,talB,PCHLO6_RS10390	G:COG0176	K00616	Transaldolase	Cytoplasm; Pentose shunt; Schiff base; Transferase.	Transaldolase is important for the balance of metabolites in the pentose-phosphate pathway; Belongs to the transaldolase family. Type 1 subfamily.; KEGG: vfi:VF_A0685 transaldolase
20	POG_GCA_000264555.1_05784	gatY-kbaY,PCHLO6_RS28625	G:COG0191	K08302	Tagatose-bisphosphate aldolase	Calvin cycle; Glycolysis; Lyase; Metal-binding; Zinc.	Catalyzes the aldol condensation of dihydroxyacetone phosphate (DHAP or glycerone-phosphate) with glyceraldehyde 3- phosphate (G3P) to form fructose 1,6-bisphosphate (FBP) in gluconeogenesis and the reverse reaction in glycolysis; Belongs to the class II fructose-bisphosphate aldolase family.; KEGG: eco:b2096 tagatose 1,6-diphosphate aldolase GatY/KbaY
20	POG_GCA_000264555.1_03258	PCHLO6_RS16125	G:COG0235	K18622	Putative aldolase class 2 protein CC_1201	Metal-binding; Zinc.	Belongs to the aldolase class II family.
20	POG_GCA_000264555.1_01433	fucA,PCHLO6_RS07145	G:COG0235	K01628	L-fuculose-phosphate aldolase	Antibiotic biosynthesis; Lyase.	May mediate the 2 consecutive oxidative decarboxylation steps in the biosynthesis of the prenylated hydroxybenzoic acid moiety of novobiocin, an aminocoumarin family antibiotic that targets bacterial DNA gyrases. Belongs to the aldolase class II family.; KEGG: pfl:PFL_1396 L-fuculose-phosphate aldolase
20	POG_GCA_000264555.1_00964	PCHLO6_RS04800	G:COG0235	K18622	Putative aldolase class 2 protein PA3430	Metal-binding; Zinc.	Belongs to the aldolase class II family.
18	POG_GCA_000264555.1_02785	otnC,PCHLO6_RS13805	G:COG0235	K22130	3-dehydro-4-phosphotetronate decarboxylase	Carbohydrate metabolism; Fucose metabolism; Lyase; Metal-binding; Zinc.	Catalyzes the cleavage of L-fuculose 1-phosphate to glycerone phosphate and L-lactaldehyde; Belongs to the aldolase class II family. AraD/FucA subfamily.; KEGG: pcp:JM49_17300 3-dehydro-4-phosphotetronate decarboxylase
19	POG_GCA_000264555.1_03111	mtlK,PCHLO6_RS15405	G:COG0246	K00045	Mannitol 2-dehydrogenase	NAD; Oxidoreductase.	Catalyzes the NAD(H)-dependent interconversion of D- fructose and D-mannitol in the mannitol metabolic pathway; Belongs to the mannitol dehydrogenase family.; KEGG: pmy:Pmen_4472 mannitol 2-dehydrogenase
20	POG_GCA_000264555.1_05110	gmhA,lpcA,PCHLO6_RS25280	G:COG0279	K03271	D-sedoheptulose 7-phosphate isomerase	Carbohydrate metabolism; Cytoplasm; Isomerase; Metal-binding; Zinc.	Catalyzes the isomerization of sedoheptulose 7-phosphate in D-glycero-D-manno-heptose 7-phosphate; Belongs to the SIS family. GmhA subfamily; Contains 1 SIS domain.; KEGG: pmy:Pmen_0909 D-sedoheptulose 7-phosphate isomerase
20	POG_GCA_000264555.1_02973	GBE1,glgB,PCHLO6_RS14740	G:COG0296	K00700	1,4-alpha-glucan branching enzyme	Carbohydrate metabolism; Glycogen biosynthesis; Glycogen metabolism; Glycosyltransferase; Transferase.	Catalyzes the formation of the alpha-1,6-glucosidic linkages in glycogen by scission of a 1,4-alpha-linked oligosaccharide from growing alpha-1,4-glucan chains and the subsequent attachment of the oligosaccharide to the alpha-1,6 position; Belongs to the glycosyl hydrolase 13 family. GlgB subfamily.; KEGG: pch:EY04_13565 1,4-alpha-glucan branching enzyme
20	POG_GCA_000264555.1_02982	treZ,glgZ,PCHLO6_RS14785	G:COG0296	K01236	4-alpha-D-((1->4)-alpha-D-glucano)trehalose trehalohydrolase	Carbohydrate metabolism; Cytoplasm; Glycosidase; Hydrolase.	Belongs to the glycosyl hydrolase 13 family.; KEGG: pfo:Pfl01_2548 maltooligosyltrehalose trehalohydrolase
20	POG_GCA_000264555.1_02983	glgA,PCHLO6_RS14790	G:COG0297	K00703	Starch synthase	Glycogen biosynthesis; Glycosyltransferase; Transferase.	Synthesizes alpha-1,4-glucan chains using ADP-glucose; Belongs to the glycosyltransferase 1 family. Bacterial/plant glycogen synthase subfamily.; KEGG: pfl:PFL_2887 starch synthase
20	POG_GCA_000264555.1_04725	PGLS,pgl,devB,PCHLO6_RS23365	G:COG0363	K01057	6-phosphogluconolactonase	Hydrolase.	Hydrolysis of 6-phosphogluconolactone to 6- phosphogluconate. Belongs to the glucosamine/galactosamine-6-phosphate isomerase family. 6-phosphogluconolactonase subfamily.; KEGG: pch:EY04_23365 6-phosphogluconolactonase
20	POG_GCA_000264555.1_03028	G6PD,zwf,PCHLO6_RS15000	G:COG0364	K00036	Glucose-6-phosphate dehydrogenase (NADP(+))	Carbohydrate metabolism; Glucose metabolism; NADP; Oxidoreductase.	Catalyzes the rate-limiting step of the oxidative pentose-phosphate pathway, which represents a route for the dissimilation of carbohydrates besides glycolysis. The main function of this enzyme is to provide reducing power (NADPH) and pentose phosphates for fatty acid and nucleic acid synthesis (By similarity); Belongs to the glucose-6-phosphate dehydrogenase family.; KEGG: pfl:PFL_3143 glucose-6…
20	POG_GCA_000264555.1_04726	G6PD,zwf,PCHLO6_RS23370	G:COG0364	K00036	Glucose-6-phosphate dehydrogenase (NADP(+))	Carbohydrate metabolism; Glucose metabolism; NADP; Oxidoreductase.	Catalyzes the oxidation of glucose 6-phosphate to 6- phosphogluconolactone. Can utilize either NADP(+) or NAD(+); Belongs to the glucose-6-phosphate dehydrogenase family.; KEGG: pci:PCH70_10690 glucose-6-phosphate 1-dehydrogenase
20	POG_GCA_000264555.1_02971	glgE,PCHLO6_RS14730	G:COG0366	K16147	Starch synthase (maltosyl-transferring)	Carbohydrate metabolism; Glycosyltransferase; Transferase.	Maltosyltransferase that uses maltose 1-phosphate (M1P) as the sugar donor to elongate linear or branched alpha-(1->4)- glucans. Is involved in a branched alpha-glucan biosynthetic pathway from trehalose, together with TreS, Mak and GlgB; Belongs to the glycosyl hydrolase 13 family. GlgE subfamily.; KEGG: pch:EY04_13555 starch synthase (maltosyl-transferring)
20	POG_GCA_000264555.1_04731	PCHLO6_RS23395	G:COG0395	K17317	L-arabinose transport system permease protein AraQ	Cell membrane; Membrane; Sugar transport; Transmembrane; Transmembrane helix; Transport.	Part of the binding-protein-dependent transport system for L-arabinose. Probably responsible for the translocation of the substrate across the membrane (By similarity); Belongs to the binding-protein-dependent transport system permease family. MalFG subfamily; Contains 1 ABC transmembrane type-1 domain.
19	POG_GCA_000264555.1_03113	PCHLO6_RS15415	G:COG0395	K10229	Probable ABC transporter permease protein y4oR	Cell inner membrane; Cell membrane; Membrane; Plasmid; Transmembrane; Transmembrane helix; Transport.	Probably part of the binding-protein-dependent transport system y4oPQRS. This system probably transports a sugar-like molecule. Probably responsible for the translocation of the substrate across the membrane. Belongs to the binding-protein-dependent transport system permease family. MalFG subfamily; Contains 1 ABC transmembrane type-1 domain.
19	POG_GCA_000264555.1_04012	PCHLO6_RS19830	G:COG0395	K17323	Maltodextrin transport system permease protein MalD	Cell membrane; Membrane; Sugar transport; Transmembrane; Transmembrane helix; Transport.	Part of the binding-protein-dependent transport system for maltodextri; probably responsible for the translocation of the substrate across the membrane. Belongs to the binding-protein-dependent transport system permease family. MalFG subfamily; Contains 1 ABC transmembrane type-1 domain.
20	POG_GCA_000264555.1_03873	PCHLO6_RS19150	G:COG0406		hypothetical protein
20	POG_GCA_000264555.1_04550	cobC,phpB,PCHLO6_RS22510	G:COG0406	K02226	Adenosylcobalamin/alpha-ribazole phosphatase	Cobalamin biosynthesis; Hydrolase.	Catalyzes the conversion of adenosylcobalamin 5'- phosphate to adenosylcobalamin (vitamin B12; involved in the assembly of the nucleotide loop of cobalamin. Also catalyzes the hydrolysis of the phospho group from alpha-ribazole 5'-phosphate to form alpha-ribazole (By similarity); Belongs to the phosphoglycerate mutase family.; KEGG: pae:PA1280 alpha-ribazole phosphatase
20	POG_GCA_000264555.1_02325	gpgP,PCHLO6_RS11555	G:COG0406	K22306	Glucosyl-3-phosphoglycerate phosphatase		KEGG: chel:AL346_22050 glucosyl-3-phosphoglycerate phosphatase
20	POG_GCA_000264555.1_04842	PK,pyk,PCHLO6_RS23950	G:COG0469	K00873	Pyruvate kinase	Alternative splicing; ATP-binding; Chloroplast; Glycolysis; Kinase; Magnesium; Metal-binding; Nucleotide-binding; Plastid; Potassium; Pyruvate; Transferase; Transit peptide.	Belongs to the pyruvate kinase family.; KEGG: rah:Rahaq_2790 pyruvate kinase
20	POG_GCA_000264555.1_01781	PK,pyk,PCHLO6_RS08875	G:COG0469	K00873	Pyruvate kinase	Alternative splicing; ATP-binding; Chloroplast; Glycolysis; Kinase; Magnesium; Metal-binding; Nucleotide-binding; Plastid; Potassium; Pyruvate; Transferase; Transit peptide.	Belongs to the pyruvate kinase family.; KEGG: pmk:MDS_1903 pyruvate kinase
20	POG_GCA_000264555.1_01327	PCHLO6_RS06620	G:COG0477	K08218	Protein AmpG	Cell inner membrane; Cell membrane; Membrane; Transmembrane; Transmembrane helix; Transport.	Probably acts as a permease in the beta-lactamase induction system and in peptidoglycan recycling; Belongs to the major facilitator superfamily.
20	POG_GCA_000264555.1_03854	PCHLO6_RS19060	G:COG0477	K08167	Tetracenomycin C resistance and export protein	Antibiotic biosynthesis; Antibiotic resistance; Cell membrane; Membrane; Transmembrane; Transmembrane helix; Transport.	Resistance to tetracenomycin C by an active tetracenomycin C efflux system which is probably energized by transmembrane electrochemical gradients. Belongs to the major facilitator superfamily. EmrB family.
18	POG_GCA_000264555.1_02707	PCHLO6_RS13420	G:COG0477	K08195	Benzoate transport protein	Cell inner membrane; Cell membrane; Membrane; Transmembrane; Transmembrane helix; Transport.	Probable uptake of benzoate. Belongs to the major facilitator superfamily. Aromatic acid:H(+) symporter (AAHS) (TC 2.A.1.15) family.
20	POG_GCA_000264555.1_05576	PCHLO6_RS27585	G:COG0477	K07552	Uncharacterized transporter BU466	Cell membrane; Membrane; Transmembrane; Transmembrane helix; Transport.	Belongs to the major facilitator superfamily.
20	POG_GCA_000264555.1_00975	PCHLO6_RS04855	G:COG0477	K08195	4-hydroxybenzoate transporter PcaK	Cell inner membrane; Cell membrane; Chemotaxis; Membrane; Transmembrane; Transmembrane helix; Transport.	Transports 4-hydroxybenzoate (4-HBA) and protocatechuate across the membrane. Driven by the proton motive force. Functions also as a chemoreceptor, which is required for chemotaxis to aromatic acids (By similarity); Belongs to the major facilitator superfamily. Aromatic acid:H(+) symporter (AAHS) (TC 2.A.1.15) family.
20	POG_GCA_000264555.1_01387	PCHLO6_RS06915	G:COG0477	K08195	4-hydroxybenzoate transporter PcaK	Cell inner membrane; Cell membrane; Chemotaxis; Membrane; Transmembrane; Transmembrane helix; Transport.	Transports 4-hydroxybenzoate (4-HBA) and protocatechuate across the membrane. Driven by the proton motive force. Functions also as a chemoreceptor, which is required for chemotaxis to aromatic acids; Belongs to the major facilitator superfamily. Aromatic acid:H(+) symporter (AAHS) (TC 2.A.1.15) family.
19	POG_GCA_000264555.1_05424	PCHLO6_RS26840	G:COG0477	K08191	Probable galactarate transporter	Cell inner membrane; Cell membrane; Membrane; Transmembrane; Transmembrane helix; Transport.	Uptake of D-galactarate; Belongs to the major facilitator superfamily. Phthalate permease family.
18	POG_GCA_000264555.1_04160	PCHLO6_RS20565	G:COG0477	K05548	Gallate transporter	Membrane; Sugar transport; Transmembrane; Transmembrane helix; Transport.	Transporter that specifically mediates the uptake of gallate; Belongs to the major facilitator superfamily. Sugar transporter (TC 2.A.1.1) family.
20	POG_GCA_000264555.1_06194	PCHLO6_RS30660	G:COG0477	K03762	Putative proline/betaine transporter	Cell membrane; Membrane; Symport; Transmembrane; Transmembrane helix; Transport.	May be a proton symporter involved in the uptake of osmolytes such as proline and glycine betaine; Belongs to the major facilitator superfamily. Sugar transporter (TC 2.A.1.1) family.
19	POG_GCA_000264555.1_03489	PCHLO6_RS17270	G:COG0477	K05819	Multidrug export protein EmrB	Antibiotic resistance; Cell inner membrane; Cell membrane; Membrane; Transmembrane; Transmembrane helix; Transport.	Confers resistance to antibiotics; Belongs to the major facilitator superfamily. EmrB family.
20	POG_GCA_000264555.1_05411	PCHLO6_RS26775	G:COG0477	K08225	Enterobactin exporter EntS	Cell inner membrane; Cell membrane; Membrane; Transmembrane; Transmembrane helix; Transport.	Exports the siderophore enterobactin out of the cell; Belongs to the major facilitator superfamily. EntS (TC 2.A.1.38) family.
20	POG_GCA_000264555.1_05215	PCHLO6_RS25805	G:COG0477	K08223	Fosmidomycin resistance protein	Antibiotic resistance; Cell inner membrane; Cell membrane; Membrane; Transmembrane; Transmembrane helix.	Confers the resistance against fosmidomycin. Belongs to the major facilitator superfamily.
11	POG_GCA_000264555.1_03272	PCHLO6_RS16195	G:COG0477	K08167	hypothetical protein
20	POG_GCA_000264555.1_04536	PCHLO6_RS22445	G:COG0477	K08155	Multidrug resistance protein D	Cell inner membrane; Cell membrane; Membrane; Transmembrane; Transmembrane helix; Transport.	Multidrug resistance pump that participates in a low energy shock adaptive response. Belongs to the major facilitator superfamily.
20	POG_GCA_000264555.1_05009	IMPA,suhB,PCHLO6_RS24785	G:COG0483	K01092	Inositol-phosphate phosphatase	Hydrolase; Magnesium; Metal-binding.	Belongs to the inositol monophosphatase family.; KEGG: eco:b2533 myo-inositol-1(or 4)-monophosphatase
20	POG_GCA_000264555.1_03475	kdgK,PCHLO6_RS17205	G:COG0524	K00874	2-dehydro-3-deoxygluconokinase	ATP-binding; Carbohydrate metabolism; Kinase; Nucleotide-binding; Plasmid; Transferase.	Involved in the degradation of glucose via the semi- phosphorylative Entner-Doudoroff pathway. Catalyzes the phosphorylation of 2-keto-3-deoxygluconate (KDG) to produce 2- keto-3-deoxy-6-phosphogluconate (KDPG); Belongs to the carbohydrate kinase pfkB family.; KEGG: kpn:KPN_03913 2-dehydro-3-deoxygluconokinase
20	POG_GCA_000264555.1_01915	rbsK,RBKS,PCHLO6_RS09530	G:COG0524	K00852	Ribokinase	ATP-binding; Carbohydrate metabolism; Cytoplasm; Kinase; Nucleotide-binding; Transferase.	Belongs to the carbohydrate kinase PfkB family.; KEGG: vbh:CMV30_05675 ribokinase
20	POG_GCA_000264555.1_02248	rbsK,RBKS,PCHLO6_RS11185	G:COG0524	K00852	Ribokinase	Alternative splicing; ATP-binding; Carbohydrate metabolism; Kinase; Nucleotide-binding; Transferase.	Belongs to the carbohydrate kinase PfkB family.; KEGG: aap:NT05HA_0080 ribokinase
20	POG_GCA_000264555.1_03827	kdgK,PCHLO6_RS18940	G:COG0524	K00874	2-dehydro-3-deoxygluconokinase	ATP-binding; Carbohydrate metabolism; Kinase; Nucleotide-binding; Transferase.	Catalyzes the phosphorylation of 2-keto-3-deoxygluconate (KDG) to produce 2-keto-3-deoxy-6-phosphogluconate (KDPG); Belongs to the carbohydrate kinase PfkB family.; KEGG: pch:EY04_18595 2-dehydro-3-deoxygluconokinase
20	POG_GCA_000264555.1_03108	scrK	G:COG0524	K00847	Fructokinase	ATP-binding; Carbohydrate metabolism; Kinase; Nucleotide-binding; Transferase.	Belongs to the carbohydrate kinase PfkB family.; KEGG: pch:EY04_14270 fructokinase
20	POG_GCA_000264555.1_02610	iolC,PCHLO6_RS12955	G:COG0524|G:COG3892	K03338	5-dehydro-2-deoxygluconokinase	ATP-binding; Kinase; Nucleotide-binding; Transferase.	Catalyzes the phosphorylation of 5-dehydro-2-deoxy-D- gluconate (2-deoxy-5-keto-D-gluconate or DKG) to 6-phospho-5- dehydro-2-deoxy-D-gluconate (DKGP); Belongs to the carbohydrate kinase PfkB family.; KEGG: pch:EY04_11780 5-dehydro-2-deoxygluconokinase
20	POG_GCA_000264555.1_01978	pps,ppsA,PCHLO6_RS09845	G:COG0574	K01007	Pyruvate, water dikinase	ATP-binding; Kinase; Magnesium; Metal-binding; Nucleotide-binding; Phosphoprotein; Pyruvate; Transferase.	Catalyzes the phosphorylation of pyruvate to phosphoenolpyruvate; Belongs to the PEP-utilizing enzyme family.; KEGG: pae:PA1770 pyruvate, water dikinase
20	POG_GCA_000264555.1_04913	PCHLO6_RS24305	G:COG0580	K02440	Glycerol uptake facilitator protein	Cell inner membrane; Cell membrane; Magnesium; Membrane; Metal-binding; Repeat; Transmembrane; Transmembrane helix; Transport.	Transporter of glycerol across the cytoplasmic membrane, with limited permeability to water and small uncharged compounds such as polyols; Belongs to the MIP/aquaporin (TC 1.A.8) family.
20	POG_GCA_000264555.1_01619	PCHLO6_RS08065	G:COG0580	K06188	Aquaporin Z 1	Cell inner membrane; Cell membrane; Membrane; Repeat; Transmembrane; Transmembrane helix; Transport.	Channel that permits osmotically driven movement of water in both directions. It is involved in the osmoregulation and in the maintenance of cell turgor during volume expansion in rapidly growing cells. It mediates rapid entry or exit of water in response to abrupt changes in osmolarity (By similarity); Belongs to the MIP/aquaporin (TC 1.A.8) family.
20	POG_GCA_000264555.1_00012	PCHLO6_RS00060	G:COG0580	K06188	Aquaporin Z	Cell inner membrane; Cell membrane; Membrane; Repeat; Transmembrane; Transmembrane helix; Transport.	Channel that permits osmotically driven movement of water in both directions. It is involved in the osmoregulation and in the maintenance of cell turgor during volume expansion in rapidly growing cells. It mediates rapid entry or exit of water in response to abrupt changes in osmolarity; Belongs to the MIP/aquaporin (TC 1.A.8) family.
20	POG_GCA_000264555.1_05243	PCHLO6_RS25950	G:COG0662		Uncharacterized protein YdbB		Belongs to the SchB/CurC family.
17	POG_GCA_000264555.1_04945	PCHLO6_RS24465	G:COG0662		hypothetical protein
20	POG_GCA_000264555.1_06196	PCHLO6_RS30670	G:COG0676	K01792	Glucose-6-phosphate 1-epimerase	Isomerase.	Belongs to the Glucose-6-phosphate 1-epimerase family.; KEGG: pfs:PFLU_6051 glucose-6-phosphate 1-epimerase
20	POG_GCA_000264555.1_04728	PCHLO6_RS23380	G:COG0676	K01792	Glucose-6-phosphate 1-epimerase		KEGG: pshi:SAMEA2665130_2115 glucose-6-phosphate 1-epimerase
20	POG_GCA_000264555.1_00372	gpmI,PCHLO6_RS01855	G:COG0696	K15633	Phosphoglycerate mutase (2,3-diphosphoglycerate-independent)	Glycolysis; Isomerase; Manganese; Metal-binding.	Catalyzes the interconversion of 2-phosphoglycerate and 3-phosphoglycerate; Belongs to the BPG-independent phosphoglycerate mutase family.; KEGG: ppu:PP_5056 2,3-bisphosphoglycerate-independent phosphoglycerate mutase
20	POG_GCA_000264555.1_00184	pgaB,PCHLO6_RS00920	G:COG0726	K11931	Poly-beta-1,6-N-acetyl-D-glucosamine N-deacetylase	Cell outer membrane; Hydrolase; Lipoprotein; Membrane; Palmitate; Signal.	Catalyzes the N-deacetylation of poly-beta-1,6-N-acetyl- D-glucosamine (PGA), a biofilm adhesin polysaccharide. N- deacetylation promotes PGA export through the PgaA porin (By similarity); Belongs to the polysaccharide deacetylase family; Contains 1 NodB homology domain.; KEGG: pch:EY04_00310 poly-beta-1,6-N-acetyl-D-glucosamine N-deacetylase; In linear amides
20	POG_GCA_000264555.1_04490	PCHLO6_RS22215	G:COG0726	K01452	Chitin deacetylase	Carbohydrate metabolism; Chitin degradation; Hydrolase; Polysaccharide degradation; Sporulation.	Hydrolyzes the N-acetamido groups of N-acetyl-D- glucosamine residues in chitin. Required for proper spore formation; Belongs to the polysaccharide deacetylase family; Contains 1 NodB homology domain.; KEGG: pmy:Pmen_2758 chitin deacetylase
20	POG_GCA_000264555.1_03144	arnD,PCHLO6_RS15570	G:COG0726	K13014	Probable 4-deoxy-4-formamido-L-arabinose-phosphoundecaprenol deformylase ArnD	Antibiotic resistance; Hydrolase; Lipid A biosynthesis; Lipid biosynthesis; Lipid metabolism; Lipopolysaccharide biosynthesis.	Catalyzes the deformylation of 4-deoxy-4-formamido-L- arabinose-phosphoundecaprenol to 4-amino-4-deoxy-L-arabinose- phosphoundecaprenol. The modified arabinose is attached to lipid A and is required for resistance to polymyxin and cationic antimicrobial peptides; Belongs to the polysaccharide deacetylase family. ArnD deformylase subfamily; Contains 1 NodB homology domain.; KEGG: pae:PA3555 undeca…
20	POG_GCA_000264555.1_04724	eda,PCHLO6_RS23360	G:COG0800	K01625	2-dehydro-3-deoxy-phosphogluconate aldolase	Lyase; Schiff base.	Belongs to the KHG/KDPG aldolase family.; KEGG: pch:EY04_23360 2-dehydro-3-deoxyphosphogluconate aldolase / (4S)-4-hydroxy-2-oxoglutarate aldolase
20	POG_GCA_000264555.1_04737	glk,PCHLO6_RS23425	G:COG0837	K00845	Glucokinase	ATP-binding; Cytoplasm; Glycolysis; Kinase; Nucleotide-binding; Transferase.	Belongs to the bacterial glucokinase family.; KEGG: pmk:MDS_3377 glucokinase
20	POG_GCA_000264555.1_03027	PGD,gnd,gntZ,PCHLO6_RS14995	G:COG1023	K00033	Phosphogluconate dehydrogenase (NADP(+)-dependent, decarboxylating)	Gluconate utilization; NAD; Oxidoreductase.	Catalyzes the oxidative decarboxylation of 6- phosphogluconate to ribulose 5-phosphate and CO(2), with concomitant reduction of NAD to NADH; Belongs to the 6-phosphogluconate dehydrogenase family.; KEGG: pam:PANA_4019 6-phosphogluconate dehydrogenase
19	POG_GCA_000264555.1_03109	xylB,XYLB,PCHLO6_RS15400	G:COG1070	K00854	Xylulokinase	ATP-binding; Carbohydrate metabolism; Kinase; Nucleotide-binding; Transferase; Xylose metabolism.	Belongs to the FGGY kinase family.; KEGG: pch:EY04_14275 xylulokinase
20	POG_GCA_000264555.1_02611	iolE,PCHLO6_RS12960	G:COG1082	K03335	Myo-inosose-2 dehydratase	Cobalt; Lyase; Manganese.	Catalyzes the dehydration of inosose (2-keto-myo- inositol, 2KMI or 2,4,6/3,5-pentahydroxycyclohexanone) to 3D- (3,5/4)-trihydroxycyclohexane-1,2-dione (D-2,3-diketo-4-deoxy-epi- inositol); Belongs to the IolE/MocC family.; KEGG: pfl:PFL_2587 inosose dehydratase
18	POG_GCA_000264555.1_05426	HPD,hppD,PCHLO6_RS26850	G:COG1082	K00457	4-hydroxyphenylpyruvate dioxygenase		KEGG: gog:C1280_13715 4-hydroxyphenylpyruvate dioxygenase
20	POG_GCA_000264555.1_00858	fruK,PCHLO6_RS04265	G:COG1105	K00882	1-phosphofructokinase	ATP-binding; Kinase; Nucleotide-binding; Transferase.	Belongs to the carbohydrate kinase PfkB family.; KEGG: pshi:SAMEA2665130_1718 1-phosphofructokinase
20	POG_GCA_000264555.1_06133	pmm-pgm,PCHLO6_RS30350	G:COG1109	K15778	Phosphomannomutase	Alginate biosynthesis; Isomerase; Lipopolysaccharide biosynthesis; Magnesium; Metal-binding; Multifunctional enzyme; Phosphoprotein; Virulence.	Highly reversible phosphoryltransferase. The phosphomannomutase activity produces a precursor for alginate polymerization, the alginate layer causes a mucoid phenotype and provides a protective barrier against host immune defenses and antibiotics. Also involved in core lipopolysaccaride (LPS) biosynthesis due to its phosphoglucomutase activity. Essential for rhamnolipid production, an exoproduct …
20	POG_GCA_000264555.1_00836	glmM,PCHLO6_RS04150	G:COG1109	K03431	Phosphoglucosamine mutase	Isomerase; Magnesium; Metal-binding; Phosphoprotein.	Catalyzes the conversion of glucosamine-6-phosphate to glucosamine-1-phosphate; Belongs to the phosphohexose mutase family.; KEGG: hiu:HIB_16730 phosphoglucosamine mutase
20	POG_GCA_000264555.1_02622	PCHLO6_RS13010	G:COG1172	K17214	Galactoside transport system permease protein MglC	Cell inner membrane; Cell membrane; Membrane; Sugar transport; Transmembrane; Transmembrane helix; Transport.	Part of the binding-protein-dependent transport system for galactoside. Probably responsible for the translocation of the substrate across the membrane. Belongs to the binding-protein-dependent transport system permease family. AraH/RbsC subfamily.
20	POG_GCA_000264555.1_02246	PCHLO6_RS11175	G:COG1172	K10440	Probable ABC transporter permease protein y4mJ	Cell inner membrane; Cell membrane; Membrane; Plasmid; Sugar transport; Transmembrane; Transmembrane helix; Transport.	Probably part of the binding-protein-dependent transport system y4mIJK. This system probably transports a sugar. Probably responsible for the translocation of the substrate across the membrane. Belongs to the binding-protein-dependent transport system permease family. AraH/RbsC subfamily.
20	POG_GCA_000264555.1_01074	PTS-Nag-EIIB,nagE,PCHLO6_RS05355	G:COG1263|G:COG1264	K02803|K02804	Protein-N(pi)-phosphohistidine--N-acetyl-D-glucosaminephosphotransferase	Cell membrane; Kinase; Membrane; Phosphotransferase system; Sugar transport; Transferase; Transmembrane; Transmembrane helix; Transport.	The phosphoenolpyruvate-dependent sugar phosphotransferase system (sugar PTS), a major carbohydrate active -transport system, catalyzes the phosphorylation of incoming sugar substrates concomitantly with their translocation across the cell membrane (By similarity). This system may be involved in glucosamine transport; Contains 1 PTS EIIA type-1 domain; Contains 1 PTS EIIB type-1 domain; Contains …
20	POG_GCA_000264555.1_01075	PCHLO6_RS05360	G:COG1263|G:COG2190	K11189	Glucose-specific phosphotransferase enzyme IIA component	Cytoplasm; Kinase; Phosphotransferase system; Sugar transport; Transferase; Transport.	The phosphoenolpyruvate-dependent sugar phosphotransferase system (sugar PTS), a major carbohydrate active -transport system, catalyzes the phosphorylation of incoming sugar substrates concomitantly with their translocation across the cell membrane. This system is involved in glucose transport (By similarity); Contains 1 PTS EIIA type-1 domain.
20	POG_GCA_000264555.1_00859	PTS-Fru-EIIB,fruA,PCHLO6_RS04270	G:COG1299|G:COG1445	K02769|K02770	Protein-N(pi)-phosphohistidine--D-fructose phosphotransferase	Cell inner membrane; Cell membrane; Kinase; Membrane; Phosphotransferase system; Repeat; Sugar transport; Transferase; Transmembrane; Transmembrane helix; Transport.	The phosphoenolpyruvate-dependent sugar phosphotransferase system (sugar PTS), a major carbohydrate active -transport system, catalyzes the phosphorylation of incoming sugar substrates concomitantly with their translocation across the cell membrane. This system is involved in fructose transport. Contains 1 PTS EIIB type-2 domain; Contains 1 PTS EIIC type-2 domain.; KEGG: vch:VCA0516 PTS system, f…
20	POG_GCA_000264555.1_01419	bglX,PCHLO6_RS07075	G:COG1472	K05349	Beta-glucosidase	Glycosidase; Hydrolase; Periplasm; Signal.	Belongs to the glycosyl hydrolase 3 family.; KEGG: pch:EY04_06195 beta-glucosidase
20	POG_GCA_000264555.1_02064	nagZ,PCHLO6_RS10270	G:COG1472	K01207	Beta-N-acetylhexosaminidase	Cell cycle; Cell division; Cell shape; Cell wall biogenesis/degradation; Cytoplasm; Glycosidase; Hydrolase; Peptidoglycan synthesis.	Plays a role in peptidoglycan recycling by cleaving the terminal beta-1,4-linked N-acetylglucosamine (GlcNAc) from peptide-linked peptidoglycan fragments, giving rise to free GlcNAc, anhydro-N-acetylmuramic acid and anhydro-N-acetylmuramic acid-linked peptides; Belongs to the glycosyl hydrolase 3 family. NagZ subfamily.; KEGG: pst:PSPTO_3507 beta-N-acetylhexosaminidase
20	POG_GCA_000264555.1_02978	ISA,treX,PCHLO6_RS14765	G:COG1523	K01214	Isoamylase	Carbohydrate metabolism; Glycogen metabolism; Glycosidase; Hydrolase.	Hydrolyzes the alpha-1,6-glucosidic linkages in glycogen which has first been partially depolymerized by phosphorylase. Shows only very little activity with native glycogen; Belongs to the glycosyl hydrolase 13 family.; KEGG: pch:EY04_13615 isoamylase
19	POG_GCA_000264555.1_02692	PCHLO6_RS13350	G:COG1593	K11690	Sialic acid TRAP transporter permease protein SiaT	Cell inner membrane; Cell membrane; Membrane; Sugar transport; Transmembrane; Transmembrane helix; Transport.	Part of the tripartite ATP-independent periplasmic (TRAP) transport system SiaPT involved in the uptake of sialic acid; In the N-terminal sectio; belongs to the TRAP transporter small permease family; In the C-terminal sectio; belongs to the TRAP transporter large permease family.
19	POG_GCA_000264555.1_02690	PCHLO6_RS13340	G:COG1638	K11688	C4-dicarboxylate-binding periplasmic protein	Periplasm; Signal; Sugar transport; Transport.	Binds C4-dicarboxylate; part of the binding-protein- dependent transport system for uptake of C4-dicarboxylates. Belongs to the bacterial solute-binding protein 7 family.
20	POG_GCA_000264555.1_02981	malQ,PCHLO6_RS14780	G:COG1640	K00705	4-alpha-glucanotransferase	Carbohydrate metabolism; Cytoplasm; Glycosyltransferase; Transferase.	Belongs to the disproportionating enzyme family.; KEGG: pfl:PFL_2885 4-alpha-glucanotransferase
19	POG_GCA_000264555.1_04010	PCHLO6_RS19820	G:COG1653	K17321	glycerol transport system substrate-binding protein
20	POG_GCA_000264555.1_04733	PCHLO6_RS23405	G:COG1653	K17315	Probable sugar-binding periplasmic protein	Periplasm; Signal; Sugar transport; Transport.	Part of a binding-protein-dependent transport system for a sugar; Belongs to the bacterial solute-binding protein 1 family.
20	POG_GCA_000264555.1_00921	PTS-Ntr-EIIA,ptsN,PCHLO6_RS04580	G:COG1762	K02806	Phosphotransferase enzyme IIA component	Cytoplasm; Kinase; Transferase.	Seems to have a role in regulating nitrogen assimilation; Contains 1 PTS EIIA type-2 domain.; KEGG: pae:PA4464 PTS system, nitrogen regulatory IIA component; Phosphotransferases with an alcohol group as acceptor
20	POG_GCA_000264555.1_01077	nagA,AMDHD2,PCHLO6_RS05370	G:COG1820	K01443	N-acetylglucosamine-6-phosphate deacetylase	Carbohydrate metabolism; Hydrolase; Metal-binding.	Hydrolyzes the N-glycolyl group from N- glycolylglucosamine 6-phosphate (GlcNGc-6-P) in the N- glycolylneuraminic acid (Neu5Gc) degradation pathway; Belongs to the NagA family.; KEGG: pch:EY04_04760 N-acetylglucosamine-6-phosphate deacetylase
20	POG_GCA_000264555.1_02249	rbsD,PCHLO6_RS11190	G:COG1869	K06726	D-ribose pyranase	Carbohydrate metabolism; Cytoplasm; Isomerase.	Catalyzes the interconversion of beta-pyran and beta- furan forms of D-ribose; Belongs to the RbsD / FucU family. RbsD subfamily.; KEGG: rah:Rahaq_4401 D-ribose pyranase
20	POG_GCA_000264555.1_02620	PCHLO6_RS13000	G:COG1879	K17213	Myo-inositol-binding protein	Periplasm; Transport.	Belongs to the bacterial solute-binding protein 2 family.
20	POG_GCA_000264555.1_00919	PCHLO6_RS04570	G:COG1925	K11189	Phosphocarrier protein HPr	Cytoplasm; Kinase; Phosphotransferase system; Serine/threonine-protein kinase; Sugar transport; Transferase; Transport.	General (non sugar-specific) component of the phosphoenolpyruvate-dependent sugar phosphotransferase system (sugar PTS). This major carbohydrate active-transport system catalyzes the phosphorylation of incoming sugar substrates concomitantly with their translocation across the cell membrane. The phosphoryl group from phosphoenolpyruvate (PEP) is transferred to the phosphoryl carrier protein HPr b…
20	POG_GCA_000264555.1_00857	PCHLO6_RS04260	G:COG1925|G:COG4668	K11183|K02768	Fructose-specific phosphotransferase enzyme IIA component	Cytoplasm; Kinase; Phosphotransferase system; Sugar transport; Transferase; Transport.	The phosphoenolpyruvate-dependent sugar phosphotransferase system (sugar PTS), a major carbohydrate active -transport system, catalyzes the phosphorylation of incoming sugar substrates concomitantly with their translocation across the cell membrane. This system is involved in fructose transport (By similarity); Contains 1 HPr domain; Contains 1 PTS EIIA type-2 domain.
20	POG_GCA_000264555.1_03504	glxK,garK,PCHLO6_RS17345	G:COG1929	K00865	Glycerate 2-kinase	ATP-binding; Kinase; Nucleotide-binding; Transferase.	Belongs to the glycerate kinase type-1 family.; KEGG: eco:b0514 glycerate 2-kinase
20	POG_GCA_000264555.1_04560	PCHLO6_RS22560	G:COG2133		L-sorbosone dehydrogenase	Cell membrane; Membrane; Oxidoreductase; Transmembrane; Transmembrane helix.	Converts L-sorbosone into 2-keto-L-gulonic acid (2KGA). To B.burgdorferi BB024.
20	POG_GCA_000264555.1_03073	yliI,PCHLO6_RS15225	G:COG2133	K21430	Soluble aldose sugar dehydrogenase YliI	Calcium; Metal-binding; Oxidoreductase; PQQ; Signal.	Aldose sugar dehydrogenase with broad substrate specificity. The physiological substrate is unknown. Can oxidize glucose to gluconolactone. Can also utilize D-arabinose, L- arabinose and 2-deoxy-glucose. Has higher activity towards oligomeric sugars, such as maltose, maltotriose or cellobiose. It may function to input sugar-derived electrons into the respiratory network; Belongs to the PQQ oxidor…
20	POG_GCA_000264555.1_05966	PCHLO6_RS29530	G:COG2271	K02445	Glycerol-3-phosphate transporter	Cell inner membrane; Cell membrane; Glycerol metabolism; Membrane; Transmembrane; Transmembrane helix; Transport.	Responsible for glycerol-3-phosphate uptake; Belongs to the major facilitator superfamily. Organophosphate:Pi antiporter (OPA) (TC 2.A.1.4) family.
19	POG_GCA_000264555.1_02686	PCHLO6_RS13320	G:COG2301	K18292	(S)-citramalyl-CoA lyase	Lyase; Magnesium; Metal-binding.	May play a role in fatty acid biosynthesis; Belongs to the HpcH/HpaI aldolase family. Citrate lyase beta subunit-like subfamily.; KEGG: pfl:PFL_2651 (S)-citramalyl-CoA lyase
20	POG_GCA_000264555.1_01782	gck,gckA,GLYCTK,PCHLO6_RS08880	G:COG2379	K11529	Glycerate 2-kinase	NADP; Oxidoreductase; Plasmid.	KEGG: pman:OU5_5208 glycerate 2-kinase
20	POG_GCA_000264555.1_01972	prpB,PCHLO6_RS09815	G:COG2513	K03417	Methylisocitrate lyase	Lyase; Magnesium; Metal-binding.	Involved in the catabolism of short chain fatty acids (SCFA) via the 2-methylcitrate cycle I (propionate degradation route). Catalyzes the thermodynamically favored C-C bond cleavage of (2R,3S)-2-methylisocitrate to yield pyruvate and succinate via an alpha-carboxy-carbanion intermediate; Belongs to the isocitrate lyase/PEP mutase superfamily. Methylisocitrate lyase family.; KEGG: pfs:PFLU_4632 m…
20	POG_GCA_000264555.1_02501	bcpA,PCHLO6_RS12430	G:COG2513	K01003	Oxaloacetate decarboxylase	Decarboxylase; Lyase; Magnesium; Metal-binding.	Catalyzes the decarboxylation of oxaloacetate into pyruvate. Seems to play a role in maintaining cellular concentrations of bicarbonate and pyruvate; Belongs to the isocitrate lyase/PEP mutase superfamily. Oxaloacetate decarboxylase family.; KEGG: pfl:PFL_2455 oxaloacetate decarboxylase
20	POG_GCA_000264555.1_01144	prpB,PCHLO6_RS05700	G:COG2513	K03417	Methylisocitrate lyase		KEGG: bra:BRADO4322 methylisocitrate lyase
20	POG_GCA_000264555.1_02883	pgl,PCHLO6_RS14300	G:COG2706	K07404	6-phosphogluconolactonase		Belongs to the cycloisomerase 2 family.; KEGG: ppw:PputW619_1581 6-phosphogluconolactonase
18	POG_GCA_000264555.1_00896	garD,PCHLO6_RS04455	G:COG2721	K01708	Galactarate dehydratase	Lyase.	Catalyzes the dehydration of galactarate to form 5- dehydro-4-deoxy-D-glucarate; Belongs to the UxaA family.; KEGG: ppu:PP_3601 galactarate dehydratase
20	POG_GCA_000264555.1_01050	PCHLO6_RS05230	G:COG2807	K03449	2-nitroimidazole transporter	Antibiotic resistance; Cell inner membrane; Cell membrane; Membrane; Transmembrane; Transmembrane helix; Transport.	Involved in efflux of 2-nitroimidazole; Belongs to the major facilitator superfamily. Cyanate porter (TC 2.A.1.17) family.
20	POG_GCA_000264555.1_00240	PCHLO6_RS01205	G:COG2807	K03449	Cyanate transport protein CynX	Cell inner membrane; Cell membrane; Membrane; Transmembrane; Transmembrane helix; Transport.	This protein is part of an active transport system that transports exogenous cyanate into E.coli cells. Belongs to the major facilitator superfamily. Cyanate porter (TC 2.A.1.17) family.
20	POG_GCA_000264555.1_01566	PCHLO6_RS07800	G:COG2807	K03449	Uncharacterized transporter YycB	Cell membrane; Membrane; Transmembrane; Transmembrane helix; Transport.	Belongs to the major facilitator superfamily. Cyanate porter (TC 2.A.1.17) family.
18	POG_GCA_000264555.1_03696	PCHLO6_RS18285	G:COG2814	K08169	Probable sugar efflux transporter	Cell inner membrane; Cell membrane; Membrane; Sugar transport; Transmembrane; Transmembrane helix; Transport.	Involved in the efflux of sugars. The physiological role may be the reduction of the intracellular concentration of toxic sugars or sugar metabolites; Belongs to the major facilitator superfamily. SotB (TC 2.A.1.2) family.
20	POG_GCA_000264555.1_04069	PCHLO6_RS20115	G:COG2814	K19577	Chloramphenicol resistance protein	Antibiotic resistance; Cell membrane; Membrane; Transmembrane; Transmembrane helix; Transport.	Belongs to the major facilitator superfamily.
18	POG_GCA_000264555.1_05798	PCHLO6_RS28695	G:COG2814	K19577	Probable sugar efflux transporter	Cell inner membrane; Cell membrane; Membrane; Sugar transport; Transmembrane; Transmembrane helix; Transport.	Involved in the efflux of sugars. The physiological role may be the reduction of the intracellular concentration of toxic sugars or sugar metabolites; Belongs to the major facilitator superfamily. SotB (TC 2.A.1.2) family.
20	POG_GCA_000264555.1_01405	PCHLO6_RS07005	G:COG2814	K19577	Probable sugar efflux transporter	Cell inner membrane; Cell membrane; Membrane; Sugar transport; Transmembrane; Transmembrane helix; Transport.	Involved in the efflux of sugars. The physiological role may be the reduction of the intracellular concentration of toxic sugars or sugar metabolites; Belongs to the major facilitator superfamily. SotB (TC 2.A.1.2) family.
20	POG_GCA_000264555.1_04086	PCHLO6_RS20200	G:COG2814	K19577	Chloramphenicol resistance protein	Antibiotic resistance; Cell membrane; Membrane; Transmembrane; Transmembrane helix; Transport.	Belongs to the major facilitator superfamily.
20	POG_GCA_000264555.1_04734	yihS,PCHLO6_RS23410	G:COG2942	K18479	Sulfoquinovose isomerase	Isomerase.	Catalyzes the isomerization of sulfoquinovose (SQ) to 6- deoxy-6-sulfo-D-fructose (SF). In vitro, can also catalyze the interconversion of mannose, fructose and glucose, or lyxose and xylulose, but has extremely low activity with glucose; Belongs to the N-acylglucosamine 2-epimerase family.; KEGG: acq:AM609_14970 sulfoquinovose isomerase
20	POG_GCA_000264555.1_00602	manA,MPI,PCHLO6_RS02995	G:COG2942	K01809	Mannose-6-phosphate isomerase	Isomerase.	Catalyzes the reversible epimerization of cellobiose to 4-O-beta-D-glucopyranosyl-D-mannose (Glc-Man). Can also use lactose, epilactose, mannobiose and cellotriose. Highly specific for oligosaccharides linked by the beta-1,4-glycosidic linkage. Shows preference for lactose; Belongs to the cellobiose 2-epimerase family.; KEGG: bpy:Bphyt_6904 mannose-6-phosphate isomerase
19	POG_GCA_000264555.1_02691	PCHLO6_RS13345	G:COG3090	K11689	C4-dicarboxylate transporter, DctQ subunit
20	POG_GCA_000264555.1_04695	gntK,idnK,PCHLO6_RS23225	G:COG3265	K00851	Gluconokinase	ATP-binding; Kinase; Nucleotide-binding; Transferase.	Belongs to the gluconokinase GntK/GntV family.; KEGG: pre:PCA10_22780 gluconokinase
20	POG_GCA_000264555.1_02980	treY,glgY,PCHLO6_RS14775	G:COG3280	K06044	(1->4)-alpha-D-glucan 1-alpha-D-glucosylmutase	Isomerase.	Catalyzes the conversion of maltooligosaccharide into the non-reducing saccharide, maltooligosyl trehalose (alpha- maltooligosyl alpha-D-glucoside) by intramolecular transglycosylation. Belongs to the glycosyl hydrolase 13 family.; KEGG: pch:EY04_13625 (1->4)-alpha-D-glucan 1-alpha-D-glucosylmutase
20	POG_GCA_000264555.1_02972	treS,PCHLO6_RS14735	G:COG3281|G:COG0366	K05343	Maltose alpha-D-glucosyltransferase	Cytoplasm; Glycosidase; Hydrolase.	Belongs to the glycosyl hydrolase 13 family.; KEGG: pch:EY04_13560 maltose alpha-D-glucosyltransferase / alpha-amylase
19	POG_GCA_000264555.1_03899	STR1,PCHLO6_RS19280	G:COG3386	K01757	Strictosidine synthase	Glycoprotein; Signal; Vacuole.	Belongs to the strictosidine synthase family.; KEGG: rha:RHA1_ro00912 strictosidine synthase
19	POG_GCA_000264555.1_02787	otnI,PCHLO6_RS13815	G:COG3622	K22131	2-dehydrotetronate isomerase	Isomerase.	Catalyzes the reversible isomerization between hydroxypyruvate and 2-hydroxy-3-oxopropanoate (also termed tartronate semialdehyde); Belongs to the hyi family.; KEGG: eco:b2739 2-dehydrotetronate isomerase
20	POG_GCA_000264555.1_01784	otnI,PCHLO6_RS08890	G:COG3622	K22131	2-dehydrotetronate isomerase	Isomerase.	Catalyzes the reversible isomerization between hydroxypyruvate and 2-hydroxy-3-oxopropanoate (also termed tartronate semialdehyde); Belongs to the hyi family.; KEGG: eco:b2739 2-dehydrotetronate isomerase
20	POG_GCA_000264555.1_05334	PCHLO6_RS26395	G:COG3664	K21000	hypothetical protein
20	POG_GCA_000264555.1_02612	iolB,PCHLO6_RS12965	G:COG3718	K03337	5-deoxy-glucuronate isomerase	Isomerase.	Involved in the isomerization of 5-deoxy-glucuronate (5DG) to 5-dehydro-2-deoxy-D-gluconate (DKG or 2-deoxy-5-keto-D- gluconate); Belongs to the isomerase IolB family.; KEGG: pfl:PFL_2588 5-deoxy-glucuronate isomerase
20	POG_GCA_000264555.1_03503	hpaI,hpcH,PCHLO6_RS17340	G:COG3836	K02510	4-hydroxy-2-oxoheptanedioate aldolase	Aromatic hydrocarbons catabolism; Lyase; Magnesium; Metal-binding; Plasmid.	Catalyzes the reversible retro-aldol cleavage of 4- hydroxy-2-oxovalerate to pyruvate and acetaldehyde; Belongs to the HpcH/HpaI aldolase family.; KEGG: ppg:PputGB1_3503 4-hydroxy-2-oxoheptanedioate aldolase
18	POG_GCA_000264555.1_03312	hpaI,hpcH,PCHLO6_RS16395	G:COG3836	K02510	4-hydroxy-2-oxoheptanedioate aldolase	Aromatic hydrocarbons catabolism; Lyase; Metal-binding.	Catalyzes the reversible retro-aldol cleavage of 4- hydroxy-2-ketoheptane-1,7-dioate (HKHD) to pyruvate and succinic semialdehyde; Belongs to the HpcH/HpaI aldolase family.; KEGG: sgl:SGP1_0040 4-hydroxy-2-oxoheptanedioate aldolase
20	POG_GCA_000264555.1_04730	PCHLO6_RS23390	G:COG3839	K10112	Spermidine/putrescine import ATP-binding protein PotA	ATP-binding; Cell membrane; Hydrolase; Membrane; Nucleotide-binding; Transport.	Part of the ABC transporter complex PotABCD involved in spermidine/putrescine import. Responsible for energy coupling to the transport system; Belongs to the ABC transporter superfamily. Spermidine/putrescine importer (TC 3.A.1.11.1) family; Contains 1 ABC transporter domain.
19	POG_GCA_000264555.1_04014	PCHLO6_RS19840	G:COG3839	K17325	Energy-coupling factor transporter ATP-binding protein EcfA2	ATP-binding; Cell membrane; Hydrolase; Membrane; Nucleotide-binding; Transport.	ATP-binding (A) component of a common energy-coupling factor (ECF) ABC-transporter complex. Unlike classic ABC transporters this ECF transporter provides the energy necessary to transport a number of different substrates; Belongs to the ABC transporter superfamily. Energy- coupling factor EcfA family; Contains 1 ABC transporter domain.
19	POG_GCA_000264555.1_03112	malK,mtlK,thuK,PCHLO6_RS15410	G:COG3839	K10111	Lactose transport ATP-binding protein LacK	ATP-binding; Cell inner membrane; Cell membrane; Membrane; Nucleotide-binding; Sugar transport; Transport.	Part of the binding-protein-dependent transport system for lactose. Probably responsible for energy coupling to the transport system. Belongs to the ABC transporter superfamily; Contains 1 ABC transporter domain.; KEGG: kpn:KPN_00426 multiple sugar transport system ATP-binding protein; Acting on acid anhydrides; catalyzing transmembrane movement of substances
19	POG_GCA_000264555.1_04015	cysA,PCHLO6_RS19845	G:COG3839	K02045	Sulfate-transporting ATPase	ATP-binding; Cell inner membrane; Cell membrane; Hydrolase; Membrane; Nucleotide-binding; Sulfate transport; Transport.	Part of the ABC transporter complex CysAWTP involved in sulfate/thiosulfate import. Responsible for energy coupling to the transport system; Belongs to the ABC transporter superfamily. Sulfate/tungstate importer (TC 3.A.1.6) family; Contains 1 ABC transporter domain.; KEGG: psd:DSC_12590 sulfate transport system ATP-binding protein
20	POG_GCA_000264555.1_03543	modC,PCHLO6_RS17530	G:COG3839	K02017	Molybdate-transporting ATPase	ATP-binding; Cell inner membrane; Cell membrane; Hydrolase; Membrane; Molybdenum; Nucleotide-binding; Transport.	Part of the ABC transporter complex ModABC involved in molybdenum import. Responsible for energy coupling to the transport system; Belongs to the ABC transporter superfamily. Molybdate importer (TC 3.A.1.8) family; Contains 1 ABC transporter domain.; KEGG: pch:EY04_16970 molybdate transport system ATP-binding protein
18	POG_GCA_000264555.1_03255	ssuB,PCHLO6_RS16110	G:COG3839	K15555	Putative ABC transporter ATP-binding protein MG187 homolog	ATP-binding; Nucleotide-binding; Transport.	Belongs to the ABC transporter superfamily; Contains 1 ABC transporter domain.; KEGG: pch:EY04_15405 sulfonate transport system ATP-binding protein; Acting on acid anhydrides; catalyzing transmembrane movement of substances
20	POG_GCA_000264555.1_02235	PCHLO6_RS11120	G:COG3979|G:COG3469	K01183	Chitinase	Carbohydrate metabolism; Chitin degradation; Glycosidase; Hydrolase; Polysaccharide degradation; Signal.	Belongs to the glycosyl hydrolase 18 family. Chitinase class II subfamily; Contains 1 fibronectin type-III domain.; KEGG: pfl:PFL_2091 chitinase
18	POG_GCA_000264555.1_05197	PCHLO6_RS25715	G:COG3979|S:COG3397	K21712	GlcNAc-binding protein A	Chitin-binding; Secreted; Signal.	Probably interacts with GlcNAc residues. May promote attachment to both epithelial cell surfaces and chitin; Belongs to the GbpA family; Contains 1 chitin-binding type-3 domain; Contains 1 chitin-binding type-4 domain.
20	POG_GCA_000264555.1_02614	iolI,PCHLO6_RS12975	G:COG4130	K06606	2-keto-myo-inositol isomerase		KEGG: psb:Psyr_3270 2-keto-myo-inositol isomerase
20	POG_GCA_000264555.1_04960	gcd,PCHLO6_RS24540	G:COG4993	K00117	Quinoprotein glucose dehydrogenase (PQQ, quinone)	Cell membrane; Membrane; Oxidoreductase; Transmembrane; Transmembrane helix.	Catalyzes the oxidation of glycerol to glycerone. Also acts, more slowly, on a number of other polyols including D- sorbitol, D-arabinitol, D-mannitol, meso-erythritol, adonitol and propylene glycol (By similarity).; KEGG: pfl:PFL_4916 quinoprotein glucose dehydrogenase
19	POG_GCA_000264555.1_05682	quiA,PCHLO6_RS28115	G:COG4993	K05358	Quinate dehydrogenase (quinone)	Cell membrane; Membrane; Oxidoreductase; Transmembrane; Transmembrane helix.	Catalyzes the oxidation of glycerol to glycerone. Also acts, more slowly, on a number of other polyols including D- sorbitol, D-arabinitol, D-mannitol, meso-erythritol, adonitol and propylene glycol (By similarity).; KEGG: pcp:JM49_03040 quinate dehydrogenase (quinone)
20	POG_GCA_000264555.1_01804	PCHLO6_RS08985	G:COG5309	K01210	Glucan 1,3-beta-glucosidase		KEGG: pen:PSEEN1452 glucan 1,3-beta-glucosidase
20	POG_GCA_000264555.1_01158	PCHLO6_RS05770	G:COG5309|M:COG1215	K01210	Glucan 1,3-beta-glucosidase		KEGG: bra:BRADO3757 glucan 1,3-beta-glucosidase
20	POG_GCA_000264555.1_04117	PCHLO6_RS20350	G:ENOG410XNQ6	K13021	Probable sulfoacetate transporter SauU	Cell membrane; Membrane; Transmembrane; Transmembrane helix; Transport.	May transport sulfoacetate into the cell; Belongs to the major facilitator superfamily.
20	POG_GCA_000264555.1_03506	PCHLO6_RS17355	G:ENOG410XNQ6	K08194	Putative tartrate transporter	Cell membrane; Membrane; Plasmid; Transmembrane; Transmembrane helix; Transport.	Component of the tartrate utilization system and may allow entry of tartrate and tartrate dehydrogenase. Belongs to the major facilitator superfamily. Phthalate permease family.
20	POG_GCA_000264555.1_03501	PCHLO6_RS17330	G:ENOG410XNQ6	K13021	Putative metabolite transport protein NicT	Aromatic hydrocarbons catabolism; Membrane; Transmembrane; Transmembrane helix; Transport.	Probable transporter, possibly involved in the aerobic nicotinate degradation pathway; Belongs to the major facilitator superfamily.
20	POG_GCA_000264555.1_03476	PCHLO6_RS17210	G:ENOG410XNQ6	K08192	Uncharacterized transporter PB1C11.03	Endoplasmic reticulum; Membrane; Phosphoprotein; Transmembrane; Transmembrane helix; Transport.	Belongs to the major facilitator superfamily. Allantoate permease family.
19	POG_GCA_000264555.1_01643	PCHLO6_RS08190	G:ENOG410XNVC		hypothetical protein
20	POG_GCA_000264555.1_01690	PCHLO6_RS08425	G:ENOG410XNX3	K19577	UPF0226 membrane protein BMA2043	Cell inner membrane; Cell membrane; Membrane; Transmembrane; Transmembrane helix.	Belongs to the UPF0226 family.
20	POG_GCA_000264555.1_01775	PCHLO6_RS08845	G:ENOG410XNZG	K08224	Uncharacterized MFS-type transporter YdeR	Cell membrane; Membrane; Transmembrane; Transmembrane helix; Transport.	Belongs to the major facilitator superfamily.
20	POG_GCA_000264555.1_02516	PCHLO6_RS12505	G:ENOG410XP7I	K03762	Alpha-ketoglutarate permease	Cell inner membrane; Cell membrane; Membrane; Symport; Transmembrane; Transmembrane helix; Transport.	Uptake of alpha-ketoglutarate across the boundary membrane with the concomitant import of a cation (symport system); Belongs to the major facilitator superfamily. Sugar transporter (TC 2.A.1.1) family.
13	POG_GCA_000264555.1_00381	PCHLO6_RS01895	G:ENOG410XP7I	K08172	Putative inner membrane metabolite transport protein YdfJ	Cell inner membrane; Cell membrane; Membrane; Symport; Transmembrane; Transmembrane helix; Transport.	Belongs to the major facilitator superfamily. Sugar transporter (TC 2.A.1.1) family.
20	POG_GCA_000264555.1_02904	PCHLO6_RS14395	G:ENOG410XP7I	K08173	Putative metabolite transport protein HI_0281	Cell inner membrane; Cell membrane; Membrane; Transmembrane; Transmembrane helix; Transport.	Belongs to the major facilitator superfamily. Sugar transporter (TC 2.A.1.1) family.
20	POG_GCA_000264555.1_04849	PCHLO6_RS23985	G:ENOG410XP7I	K03761	Alpha-ketoglutarate permease	Cell inner membrane; Cell membrane; Membrane; Symport; Transmembrane; Transmembrane helix; Transport.	Uptake of alpha-ketoglutarate across the boundary membrane with the concomitant import of a cation (symport system); Belongs to the major facilitator superfamily. Sugar transporter (TC 2.A.1.1) family.
20	POG_GCA_000264555.1_05262	PCHLO6_RS26045	G:ENOG410XP7I	K08173	Putative proline/betaine transporter	Cell membrane; Membrane; Symport; Transmembrane; Transmembrane helix; Transport.	May be a proton symporter involved in the uptake of osmolytes such as proline and glycine betaine; Belongs to the major facilitator superfamily. Sugar transporter (TC 2.A.1.1) family.
20	POG_GCA_000264555.1_01086	PCHLO6_RS05415	G:ENOG410XP7I	K08172	Putative metabolite transport protein HI_0418	Cell inner membrane; Cell membrane; Membrane; Transmembrane; Transmembrane helix; Transport.	Belongs to the major facilitator superfamily. Sugar transporter (TC 2.A.1.1) family.
20	POG_GCA_000264555.1_01414	PCHLO6_RS07050	G:ENOG410XP7I	K03761	Osmoprotectant uptake system A	Cell inner membrane; Cell membrane; Membrane; Symport; Transmembrane; Transmembrane helix; Transport.	Involved in uptake and accumulation of various osmoprotectants. Allows the uptake of glycine betaine, proline, ectoine, and pipecolic acid. Belongs to the major facilitator superfamily. Sugar transporter (TC 2.A.1.1) family.
20	POG_GCA_000264555.1_04272	PCHLO6_RS21115	G:ENOG410XP7I	K08173	Shikimate transporter	Cell inner membrane; Cell membrane; Membrane; Symport; Transmembrane; Transmembrane helix; Transport.	Belongs to the major facilitator superfamily. Sugar transporter (TC 2.A.1.1) family.
18	POG_GCA_000264555.1_04276	PCHLO6_RS21135	G:ENOG410XP7I	K08173	Putative metabolite transport protein HI_0281	Cell inner membrane; Cell membrane; Membrane; Transmembrane; Transmembrane helix; Transport.	Belongs to the major facilitator superfamily. Sugar transporter (TC 2.A.1.1) family.
20	POG_GCA_000264555.1_02070	PCHLO6_RS10300	G:ENOG410XP7I	K03288	Citrate-proton symporter	Cell inner membrane; Cell membrane; Citrate utilization; Membrane; Plasmid; Symport; Transmembrane; Transmembrane helix; Transport; Transposable element.	Uptake of citrate across the boundary membrane with the concomitant transport of protons into the cell (symport system). Belongs to the major facilitator superfamily. Sugar transporter (TC 2.A.1.1) family.
20	POG_GCA_000264555.1_01393	PCHLO6_RS06945	G:ENOG410XP7I	K03761	Alpha-ketoglutarate permease	Cell inner membrane; Cell membrane; Membrane; Symport; Transmembrane; Transmembrane helix; Transport.	Uptake of alpha-ketoglutarate across the boundary membrane with the concomitant import of a cation (symport system); Belongs to the major facilitator superfamily. Sugar transporter (TC 2.A.1.1) family.
14	POG_GCA_000264555.1_05049	PCHLO6_RS24980	G:ENOG410XP83	K11073	Putrescine-binding periplasmic protein	Disulfide bond; Periplasm; Signal; Transport.	Required for the activity of the bacterial periplasmic transport system of putrescine. Polyamine binding protein; Belongs to the bacterial solute-binding protein PotD/PotF family.
20	POG_GCA_000264555.1_03067	PCHLO6_RS15195	G:ENOG410XPHU	K03762	UPF0226 membrane protein BMA2043	Cell inner membrane; Cell membrane; Membrane; Transmembrane; Transmembrane helix.	Belongs to the UPF0226 family.
19	POG_GCA_000264555.1_03115	PCHLO6_RS15425	G:ENOG410XPU2	K10227	sorbitol/mannitol transport system substrate-binding protein
20	POG_GCA_000264555.1_00895	PCHLO6_RS04450	G:ENOG410XPWC	K03535	Probable glucarate transporter	Cell membrane; Membrane; Transmembrane; Transmembrane helix; Transport.	Uptake of D-glucarate. Belongs to the major facilitator superfamily. Phthalate permease family.
20	POG_GCA_000264555.1_04547	PCHLO6_RS22495	G:ENOG410XPZP	K08187	Uncharacterized MFS-type transporter YbfB	Cell membrane; Membrane; Transmembrane; Transmembrane helix; Transport.	Belongs to the major facilitator superfamily.
20	POG_GCA_000264555.1_04241	PCHLO6_RS20960	G:ENOG410XQD0	K08168	MFS transporter, AAHS family, 4-hydroxybenzoate transporter
20	POG_GCA_000264555.1_00710	PCHLO6_RS03525	G:ENOG410XQKC	K08369	Putative metabolite transport protein YyaJ	Cell membrane; Membrane; Transmembrane; Transmembrane helix; Transport.	Belongs to the major facilitator superfamily. Sugar transporter (TC 2.A.1.1) family.
20	POG_GCA_000264555.1_04474	PCHLO6_RS22135	G:ENOG410XQVS	K05820	Maltose permease	Cell membrane; Membrane; Symport; Transmembrane; Transmembrane helix; Transport.	High affinity transport of maltose. Belongs to the LacY/RafB permease family. HcaT subfamily.
19	POG_GCA_000264555.1_02188	PCHLO6_RS10890	G:ENOG410XR1I		hypothetical protein
[truncated: 3,574 more rows]

## Sheet: Uniques PCL1606
Occurence(20)	POG name	Other name(s)	EggNog ID	Kegg ID	Product	Function	Note
1	POG_GCA_000963835.1_06020	,			hypothetical protein
3	POG_GCA_000281915.1_04136	PCHL3084_RS20455			hypothetical protein
1	POG_GCA_000963835.1_03449	PCL1606_RS17055			hypothetical protein
1	POG_GCA_000963835.1_06005	,			hypothetical protein
3	POG_GCA_000963835.1_05036	PCL1606_RS24920			hypothetical protein
1	POG_GCA_000963835.1_02576	,			hypothetical protein
[truncated: 496 more rows]

## Sheet: Uniques PCL1601
Occurence(20)	POG name	Other name(s)	EggNog ID	Kegg ID	Product	Function	Note
[truncated: 459 more rows]

[truncated: 4 more sheets: Uniques PCL1607, Share PCL1606-PCL1601, Share PCL1606-PCL1607, Share PCL1601-PCL1607]
