# Supplementary material for: Interplay between rhizospheric Pseudomonas chlororaphis strains lays the basis for beneficial bacterial consortia
Source: Front Plant Sci. 2022 Dec 15;13:1063182. doi: 10.3389/fpls.2022.1063182 (PMC9797978; doi:10.3389/fpls.2022.1063182)
Supplement: Supplementary file 9 [file Table_5.xlsx]

## Sheet: PGPgenes info
Name	BGC type	ref strain name	genes/operon name	ref genome	Accession(MIBiG)	genebank cluster/gene id	Genome Region	Operon locus
Antibiotics
2,4-diacetylphloroglucinol (2,4-DAPG)	Poliketide	Pseudomonas fluorescens F113			BGC0000280	AF497760.1
2-hydroxyphenazine-1-carboxylic acid (2-OH-PCA)	Operon	Pseudomonas chlororaphis subsp. aureofaciens 30-84	phzABCDEFGO	GCF_000281915.1				PCHL3084_RS25235 - PCHL3084_RS25280
Phenazine-1-carboxamida (PCN)	Operon	Pseudomonas chlororaphis PCL1391	phzRIABCDEFGH			AF195615.1
Phenazine-1-carboxylic acid (PCA)	Operon	Pseudomonas chlororaphis subsp. aureofaciens 30-84	phzABCDEFG	GCF_000281915.1
Pyocyanine	Others/Operon	Pseudomonas aeruginosa PAO1			BGC0000936	AF005404.2
Pyoluteorin	Poliketide	Pseudomonas fluorescens Pf-5			BGC0000127	AF081920.3
Pyrrolnitrin	Others	Pseudomonas chlororaphis			BGC0000924	EU188755.1
Hydrogen cyadine (HCN)	operon	Pseudomonas aeruginosa PAO1	hcnABC	GCF_000006765.1				PA2193-PA2195
2-hexyl-5-propyl resorcinol (HPR)	GC	Pseudomonas chlororaphis subsp. aurantiaca BL915				AY135187.1
Siderophores
Enterobactin	NRP	Pseudomonas sp. J465			BGC0000343	GQ370384.1
Pseudomonine	NRP	Pseudomonas fluorescens WCS374			BGC0000410	EF484930.1
Pyochelin	NRP	Pseudomonas aeruginosa PAO1			BGC0000412	AF074705.2
Pyoverdin	NRP	Pseudomonas protegens Pf-5			BGC0000413	CP000076.1	4702146 - 4877199
Quinolobactin	Others	Pseudomonas fluorescens ATCC 17400			BGC0000925	AY271621.1
Achromobactin	Operon	Dyckeya dadntii 3937		CP002038.1			1735886 - 1756488
Plant-Bacteria Interaction
IAA biosynthesis	genes involved in	Various	iaaM/iaaH/other
1-aminocyclopropane-1-carboxylate deaminase (ACCD)	gene	Pseudomonas putida UW4	acdS			AY823987.1
IAA catabolism aerobic pathway (iac)	Gene cluster	Pseudomonas putida 1290	iacABDCDEFGHI
IAA catabolism anaerobic pathway (iaa)	Gene cluster	Aromatoleum aromaticum EbN1	iaaABCDEFGHIJKLM
Phenylacetic acid catabolism (PAA)	Catabolon Gene cluster	Pseudomonas putida				AF029714.3
2,3-butanediol biosynthesis	genes involved in	Various	BudC/ydjL
Acetoin catabolism	genes involved in	Pseudomonas protogens Pf-5	acoRABCD	GCF_000012265.1
Pyrroloquinoline (PQQ)	operon	Pseudomonas aeruginosa PAO1	pqqABCDEH	GCF_000006765.1				PA1985-1990
Denitrification
nar	Gene cluster	Pseudomonas fluorescence C7R12				AF197465.1
nir	Gene cluster	Pseudomonas fluorescence C7R12				AF197466.1
nor	Gene cluster	Pseudomonas fluorescence C7R12				AF197467.1
nos	Gene cluster	Pseudomonas fluorescence C7R12				AF197468.1
